# Supplementary material for: Palladium(ii)-catalyzed intramolecular C–H amination to carbazole: the crucial role of cyclic diacyl peroxides
Source: Royal Society of Chemistry journal article supplement (doi:10.1039/d4qo00779d), 2024-01-01

## Supporting Information

### Palladium(II)-Catalyzed Intramolecular C–H Amination to Carbazole: Crucial Role of Cyclic Diacyl Peroxides

Ting Yuan, Kang Fu, and Lei Shi\*

#### Table of Contents

|                                                                                             |     |
|---------------------------------------------------------------------------------------------|-----|
| 1. General information .....                                                                | S1  |
| 2. Representative conditions in carbazoles Synthesis .....                                  | S2  |
| 3. Representative KIE values of electrophilic aromatic mechanism.....                       | S2  |
| 4. Possible mechanism .....                                                                 | S3  |
| 5. General procedures for the preparation of substrates (1) .....                           | S4  |
| 5.1 General procedure A .....                                                               | S4  |
| 5.2 General procedure B .....                                                               | S11 |
| 6. Synthesis of carbazoles (2) .....                                                        | S13 |
| 6.1 Reaction optimization .....                                                             | S13 |
| 6.2 General procedure for carbazoles synthesis .....                                        | S15 |
| 7. Gram-scale Synthesis of <i>N</i> -Ts-Carbazole (2a).....                                 | S31 |
| 8. Optical and photoperties .....                                                           | S31 |
| 8.1 Photographs of <b>2a</b> , <b>2i</b> , <b>2j</b> powders.....                           | S31 |
| 8.2 UV-Vis and fluorescence spectra. ....                                                   | S31 |
| 8.3 Photophysical data .....                                                                | S32 |
| 9. Green chemistry metrics analysis.....                                                    | S33 |
| 10. Mechanistic experiments.....                                                            | S36 |
| 10.1 Radical inhibition experiments .....                                                   | S36 |
| 10.2 Reaction rate of carbazoles synthesis .....                                            | S37 |
| 10.3 Light On/Off experiment.....                                                           | S38 |
| 10.4 Screening of light source.....                                                         | S38 |
| 10.5 Investigation in palladium(II) 2,2-dimethylmalonate .....                              | S39 |
| 10.6 2,2-Dimethylmalonic acid identified by NMR spectra.....                                | S41 |
| 10.7 Competition experiments of <i>meta</i> -substituted <i>N</i> -Ts-2-Phenylanilines..... | S43 |
| 10.8 Kinetic experiments .....                                                              | S46 |
| 10.9 Intermolecular kinetic isotope effect.....                                             | S50 |
| 10.10 Intramolecular kinetic isotope effect.....                                            | S53 |
| 10.11 The parallel kinetic isotope effect .....                                             | S55 |
| 11. References.....                                                                         | S57 |
| 12. Copies of NMR spectra.....                                                              | S59 |

## 1. General information

Unless otherwise noted, all experiments were carried out under air atmosphere. Commercially available reagents, starting materials and solvents were used without further purification. All the solvents including *N,N*-dimethylformamide (DMF), 1,2-dimethoxyethane (DME), dimethyl sulfoxide (DMSO), 1,2-dichloroethane (DCE), dichloromethane (DCM), acetonitrile (MeCN), toluene (PhMe), tetrahydrofuran (THF), ethyl acetate (EA), petroleum ether (PE) and acetone were used as received without purification. Flash column chromatography was performed using 200-300 mesh silica gel. Schlenk tubes were purchased from Synthware.

All reactions were monitored by TLC and visualized by UV lamp (254 nm).  $^1\text{H}$  NMR (400 MHz or 600 MHz) and  $^{13}\text{C}$  NMR (101 MHz or 150 MHz) spectra were obtained on Bruker 400M or 600M or Zhongke-Niujin (Quantum-I Plus 400M) nuclear magnetic resonance spectrometers. For  $\text{CDCl}_3$  solutions, the chemical shifts are reported as parts per million (ppm) referenced to residual protium or carbon of the solvents;  $\text{CHCl}_3$   $\delta$  H (7.26 ppm) and  $\text{CDCl}_3$   $\delta$  C (77.16 ppm). For  $\text{DMSO-}d_6$  solutions, the chemical shifts are reported as parts per million (ppm) referenced to residual protium or carbon of the solvents;  $\text{DMSO-}d_6$   $\delta$  H (2.5 ppm) and  $\text{DMSO-}d_6$   $\delta$  C (39.6 ppm). Coupling constants ( $J$ ) are reported in Hertz (Hz). Data for  $^1\text{H}$  NMR and  $^{13}\text{C}$  NMR spectra are reported as follows: chemical shift (ppm, referenced to protium: s = singlet, d = doublet, t = triplet, q = quartet, p = pentet (quintet), dd = doublet of doublets, td = triplet of doublets, ddd = doublet of doublet of doublets, m = multiplet, coupling constant (Hz), and integration). HRMS (ESI) was recorded using an Agilent 6520 accurate-Mass Q-TOF spectrometer. Yields of kinetic experiments were determined by LC-MS using the Agilent 1260 Infinity II G7129A/ G7115A/ G6125B or GC using Agilent 7890B.

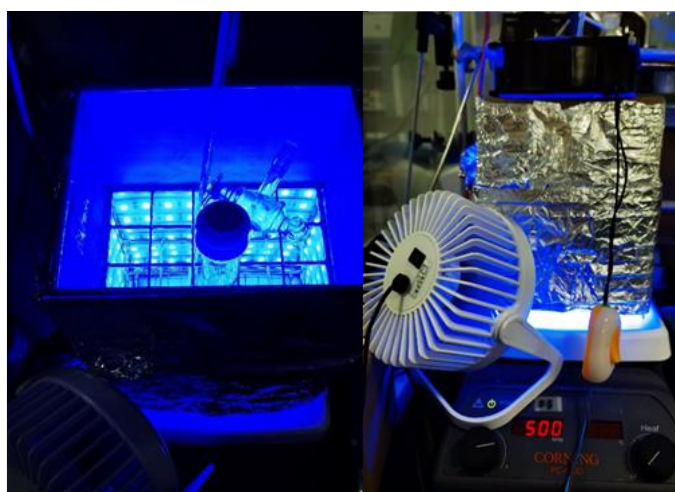

**Figure S1.** The photoreaction setup using blue LEDs

## 2. Representative conditions in carbazoles synthesis

PG = protecting group

Cat = Catalyst Ox = Oxidant A = Additive

|                            | Pd <sup>II</sup> / Pd <sup>IV</sup>  |                                      |                                                            | Pd <sup>0</sup> / Pd <sup>II</sup>                | Cu <sup>II</sup> -catalyzed or Metal-free                    | Metal-free                           |
|----------------------------|--------------------------------------|--------------------------------------|------------------------------------------------------------|---------------------------------------------------|--------------------------------------------------------------|--------------------------------------|
| <b>Cat</b>                 | Pd(OAc) <sub>2</sub><br>5-10 mol%    | Pd(OAc) <sub>2</sub><br>5-10 mol%    | Pd(OAc) <sub>2</sub><br>10 mol%<br>Photocatalyst<br>1 mol% | Pd(OAc) <sub>2</sub><br>5 mol%                    | Cu(OTf) <sub>2</sub><br>5 mol%                               | RI<br>10 mol%                        |
| <b>Ox</b>                  | PhI(OAc) <sub>2</sub><br>1.2 equiv   | Oxone<br>1.0 equiv                   | O <sub>2</sub>                                             | Cu(OAc) <sub>2</sub> /O <sub>2</sub><br>1.0 equiv | PhI(OAc) <sub>2</sub> or PhI(OTFA) <sub>2</sub><br>1.5 equiv | AcOOH<br>2.0 equiv                   |
| <b>A</b>                   | AcOH<br>1.0 equiv                    | <i>p</i> -TsOH<br>0.5 equiv          | —                                                          | —                                                 | CF <sub>3</sub> COOH                                         | —                                    |
| <b>hν</b>                  | —                                    | —                                    | blue LEDs                                                  | —                                                 | —                                                            | —                                    |
| <b>PG</b>                  | Bn<br>up to 96% yield<br>29 examples | Ts<br>up to 98% yield<br>31 examples | Ac, SO <sub>2</sub> Ph<br>up to 98% yield<br>25 examples   | Ac<br>up to 98% yield<br>18 examples              | Ac, SO <sub>2</sub> Ph<br>up to 98% yield<br>27 examples     | Ac<br>up to 98% yield<br>18 examples |
| <b>Solvent &amp; Temp.</b> | Toluene<br>RT                        | PivOH/DMF(1:3)<br>25-80 °C           | DMSO<br>80 °C                                              | Toluene<br>120 °C                                 | DME<br>25-50 °C                                              | HFIP/DCM(1:1)<br>RT                  |

Figure S2. Various conditions in carbazoles synthesis<sup>1-6</sup>

## 3. Representative KIE values of electrophilic aromatic mechanism

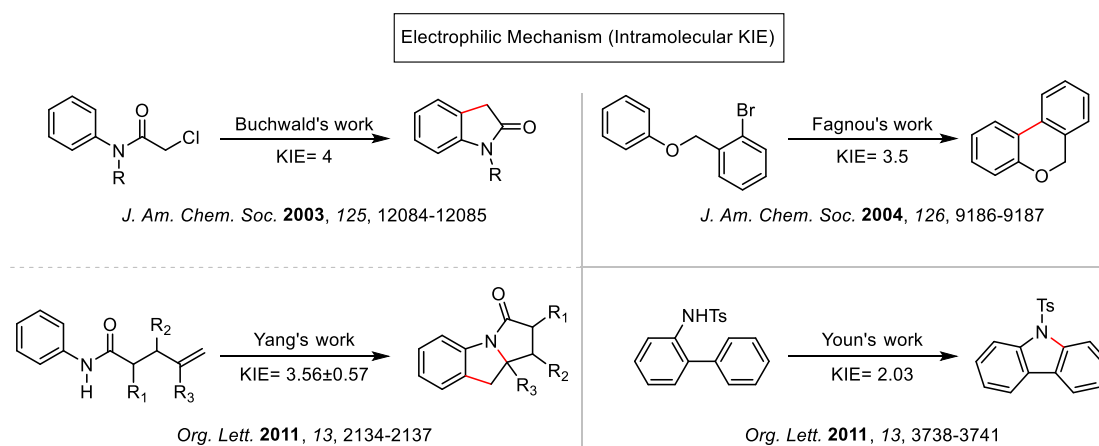

Figure S3. Various intramolecular KIE values in electrophilic aromatic mechanism

## 4. Possible mechanism

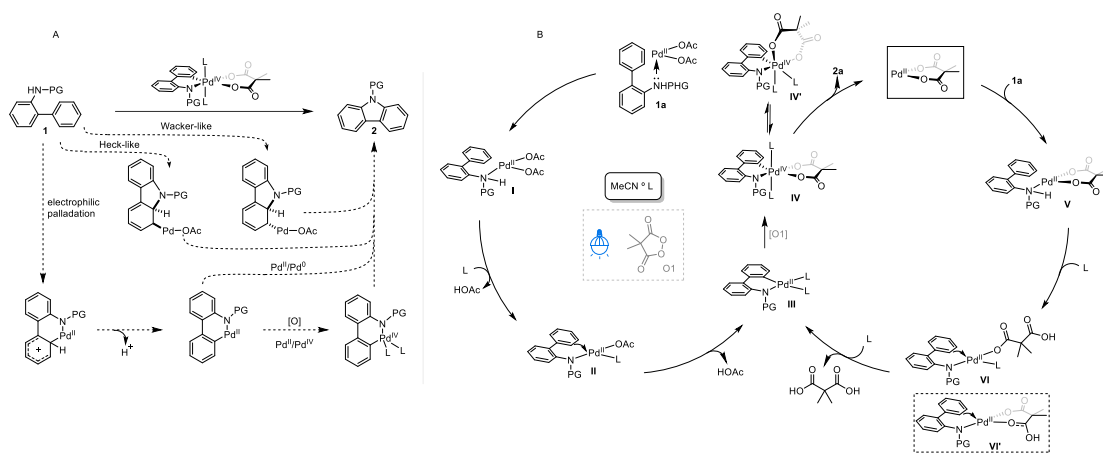

**Figure S4.** Possible mechanism for C–H bond amination



## 5. General procedures for the preparation of substrates (1)

### 5.1 General procedure A

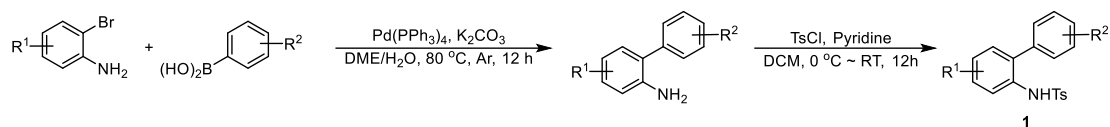

A dry round bottom flask flushed with argon and equipped with a magnetic stirrer bar and a septum was charged with arylboronic acid (1.5 equiv),  $K_2CO_3$  (4.0 equiv), and  $Pd(PPh_3)_4$  (10 mol%). A mixture of DME and  $H_2O$  (DME :  $H_2O$  = 1:1, 0.25 M), 2-Bromoaniline (1.0 equiv) were added, and the resulting mixture was heated to 80 °C for 12 hours. The reaction mixture was then poured into water and extracted with  $CH_2Cl_2$  (3-5 times), dried over anhydrous  $Na_2SO_4$ , and concentrated under reduced pressure. The residue was purified by column chromatography on silica gel to give the corresponding 2-aminobiphenyl product.

A dry round bottom flask equipped with a magnetic stirrer bar was charged with 2-aminobiphenyl (1.0 equiv), pyridine (0.2 M) in  $CH_2Cl_2$  (0.2 M). 4-toluenesulfonyl chloride (1.1 equiv) was added at 0 °C. After being stirred at 25 °C for 12 h, the reaction mixture was poured into water and extracted with  $CH_2Cl_2$  (3-5 times), dried over anhydrous  $Na_2SO_4$ , and concentrated under reduced pressure. The residue was purified by column chromatography on silica gel to give the desired product **1**.

The spectral data of the compounds **1a-1d**, **1g-1n**, **1aa**, **1ab**, **1ad**, **1ae**, **1ag-1ai**, **1ak**, **1al**, **1ao**, **1aq**, **1ba-1be**, **1da**, **1ea**, **1fb**, **1fc** are in accordance with previous reports.<sup>2, 7</sup>

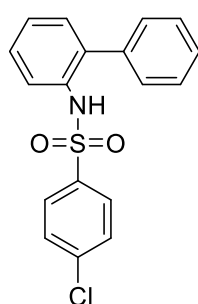

**N-(4-Chlorobenzenesulfonyl)-2-aminobiphenyl(1e)**: white solid; Yield 90%;  $^1H$  NMR (400 MHz,  $CDCl_3$ )  $\delta$  7.70 (dd,  $J$  = 8.2, 1.3 Hz, 1H), 7.48 – 7.41 (m, 2H), 7.41 – 7.30 (m, 6H), 7.19 (td,  $J$  = 7.5, 1.2 Hz, 1H), 7.12 (dd,  $J$  = 7.6, 1.7 Hz, 1H), 6.89 – 6.80 (m, 2H), 6.67 (s, 1H);  $^{13}C$  NMR (101 MHz,  $CDCl_3$ )  $\delta$  139.64, 137.56, 137.22, 134.71, 133.20, 130.50, 129.36, 129.27, 128.90, 128.83, 128.63, 128.29, 125.73, 122.45; HRMS (ESI)  $m/z$  calcd for  $C_{18}H_{14}ClNNaO_2S^+$  ( $M+Na$ )<sup>+</sup> 366.0326, found 366.0329.

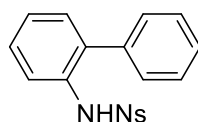

**N-([1,1'-biphenyl]-2-yl)-4-nitrobenzenesulfonamide(1f)**: grey solid; Yield 92%;  $^1H$  NMR (400 MHz,  $CDCl_3$ )  $\delta$  8.21 – 8.13 (m, 2H), 7.71 (dd,  $J$  = 8.2, 1.3 Hz, 1H), 7.68 – 7.60 (m, 2H), 7.43 – 7.28 (m, 4H), 7.23 (dd,  $J$  = 7.5, 1.3 Hz, 1H), 7.13 (dd,  $J$  = 7.6, 1.7 Hz, 1H), 6.82 (dt,  $J$  = 6.5, 1.5 Hz, 3H);  $^{13}C$  NMR (101 MHz,  $CDCl_3$ )  $\delta$  130.64, 129.37, 129.10, 128.70, 128.46, 126.43, 124.24, 123.12; HRMS (ESI)  $m/z$  calcd for  $C_{18}H_{14}N_2NaO_4S^+$  ( $M+Na$ )<sup>+</sup> 377.0566, found 377.0568.

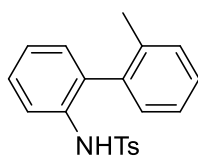

**4-methyl-N-(2'-methyl-[1,1'-biphenyl]-2-yl)benzenesulfonamide(1ac):**

white solid; Yield 87%;  $^1\text{H NMR}$  (400 MHz,  $\text{CDCl}_3$ )  $\delta$  7.81 – 7.59 (m, 2H), 7.54 – 7.48 (m, 2H), 7.33 – 7.27 (m, 1H), 7.20 (d,  $J = 7.9$  Hz, 2H), 7.12 (qd,  $J = 7.5, 1.6$  Hz, 2H), 7.04 – 6.92 (m, 2H), 6.56 (dd,  $J = 7.5, 1.5$  Hz, 1H), 6.25 (s, 1H), 2.40 (s, 3H), 1.84 (s, 3H);  $^{13}\text{C NMR}$  (101 MHz,  $\text{CDCl}_3$ )  $\delta$  144.06, 136.82, 136.32, 136.08, 134.20, 132.69, 132.42, 130.83, 130.17, 129.70, 128.83, 128.65, 127.39, 126.45, 124.48, 120.00, 21.70, 21.66, 19.61; **HRMS (ESI)**  $m/z$  calcd for  $\text{C}_{20}\text{H}_{19}\text{NNaO}_2\text{S}^+$  ( $\text{M}+\text{Na}$ ) $^+$  360.1029, found 360.1029.

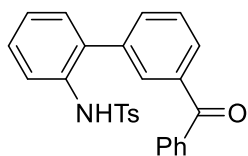

**N-(3'-benzoyl-[1,1'-biphenyl]-2-yl)-4-methylbenzenesulfonamide(1af):**

white solid; Yield 84%;  $^1\text{H NMR}$  (400 MHz,  $\text{CDCl}_3$ )  $\delta$  7.86 – 7.77 (m, 2H), 7.76 – 7.67 (m, 2H), 7.66 – 7.59 (m, 1H), 7.57 – 7.41 (m, 5H), 7.36 (td,  $J = 8.2, 7.8, 1.9$  Hz, 1H), 7.24 – 7.07 (m, 6H), 6.55 (s, 1H), 2.31 (s, 3H);  $^{13}\text{C NMR}$  (101 MHz,  $\text{CDCl}_3$ )  $\delta$  196.03, 144.25, 138.49, 137.79, 137.21, 136.01, 133.77, 133.46, 132.96, 132.81, 130.51, 130.30, 130.20, 129.77, 129.22, 128.99, 128.65, 127.19, 125.40, 122.23, 21.61; **HRMS (ESI)**  $m/z$  calcd for  $\text{C}_{26}\text{H}_{21}\text{NNaO}_3\text{S}^+$  ( $\text{M}+\text{Na}$ ) $^+$  450.1134, found 450.1133.

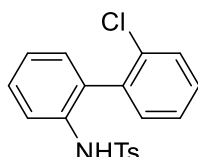

**N-(2'-chloro-[1,1'-biphenyl]-2-yl)-4-methylbenzenesulfonamide(1aj):**

white solid; Yield 90%;  $^1\text{H NMR}$  (400 MHz,  $\text{CDCl}_3$ )  $\delta$  7.71 (dd,  $J = 8.3, 1.3$  Hz, 1H), 7.50 – 7.41 (m, 3H), 7.35 (dtd,  $J = 21.5, 7.8, 1.7$  Hz, 2H), 7.16 (dtd,  $J = 8.7, 7.5, 1.3$  Hz, 4H), 7.05 (dd,  $J = 7.6, 1.7$  Hz, 1H), 6.62 (dd,  $J = 7.6, 1.7$  Hz, 1H), 6.29 (s, 1H), 2.39 (s, 3H);  $^{13}\text{C NMR}$  (101 MHz,  $\text{CDCl}_3$ )  $\delta$  143.94, 136.31, 135.93, 134.04, 133.56, 131.57, 130.58, 130.01, 129.98, 129.70, 129.39, 127.36, 127.29, 125.16, 121.97, 21.69; **HRMS (ESI)**  $m/z$  calcd for  $\text{C}_{19}\text{H}_{16}\text{ClNNaO}_2\text{S}^+$  ( $\text{M}+\text{Na}$ ) $^+$  380.0482, found 380.0486.

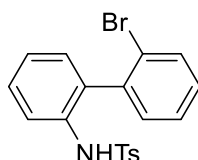

**N-(2'-bromo-[1,1'-biphenyl]-2-yl)-4-methylbenzenesulfonamide(1am):**

white solid; Yield 89%;  $^1\text{H NMR}$  (400 MHz,  $\text{CDCl}_3$ )  $\delta$  7.67 (ddd,  $J = 26.8, 8.0, 1.3$  Hz, 2H), 7.52 – 7.45 (m, 2H), 7.37 (td,  $J = 7.7, 1.7$  Hz, 1H), 7.25 – 7.20 (m, 1H), 7.20 – 7.13 (m, 4H), 7.03 (dd,  $J = 7.6, 1.7$  Hz, 1H), 6.58 (dd,  $J = 7.3, 2.0$  Hz, 1H), 6.24 (s, 1H), 2.40 (s, 3H);  $^{13}\text{C NMR}$  (101 MHz,  $\text{CDCl}_3$ )  $\delta$  143.99, 137.92, 136.34, 133.87, 133.22, 133.06, 131.48, 130.45, 130.17, 129.73, 129.39, 127.87, 127.44, 124.98, 123.90, 121.57, 21.70; **HRMS (ESI)**  $m/z$  calcd for  $\text{C}_{19}\text{H}_{16}\text{BrNNaO}_2\text{S}^+$  ( $\text{M}+\text{Na}$ ) $^+$  423.9977, found 423.9979.

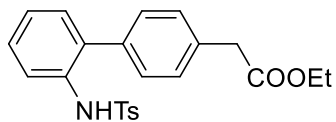

**ethyl 2-(2'-((4-methylphenyl)sulfonamido)-[1,1'-biphenyl]-4-yl)acetate(1an):**

white solid; Yield 85%;  $^1\text{H NMR}$  (400 MHz,  $\text{CDCl}_3$ )  $\delta$  7.70 (dd,  $J = 8.3, 1.3$  Hz, 1H), 7.51 – 7.44 (m, 2H), 7.32 (td,  $J = 8.2, 7.8, 1.8$  Hz, 1H), 7.27 (d,  $J = 8.3$  Hz, 2H), 7.22 – 7.17 (m, 2H), 7.16 – 7.05 (m, 2H), 6.85 – 6.78 (m, 2H), 6.58 (s, 1H), 4.21 (q,  $J = 7.2$  Hz, 2H), 3.65 (s, 2H), 2.40 (s, 3H), 1.30 (t,  $J = 7.1$  Hz, 3H);  $^{13}\text{C NMR}$  (101 MHz,  $\text{CDCl}_3$ )  $\delta$  171.44, 144.03, 136.25, 136.07, 134.25, 133.89, 133.60, 130.42, 130.10, 129.73, 129.24, 128.79, 127.30, 125.02, 121.43, 61.22, 41.14, 21.70, 14.36; **HRMS (ESI)**  $m/z$  calcd for  $\text{C}_{23}\text{H}_{23}\text{NNaO}_4\text{S}^+$  ( $\text{M}+\text{Na}$ ) $^+$  432.1240, found 432.1244.

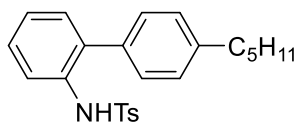

**4-methyl-*N*-(4'-pentyl-[1,1'-biphenyl]-2-yl)benzenesulfonamide(1ap):** white solid; Yield 88%;  $^1\text{H NMR}$  (400 MHz,  $\text{CDCl}_3$ )  $\delta$  7.69 (dd,  $J = 8.2, 1.3$  Hz, 1H), 7.48 (d,  $J = 8.3$  Hz, 2H), 7.35 – 7.26 (m, 1H), 7.22 – 7.00 (m, 6H), 6.80 – 6.71 (m, 2H), 6.64 (s, 1H), 2.63 (dd,  $J = 8.8, 6.7$  Hz, 2H), 2.40 (s, 3H), 1.86 (s, 1H), 1.72 – 1.62 (m, 2H), 1.37 (ddt,  $J = 7.2, 5.6, 2.8$  Hz, 4H), 0.98 – 0.86 (m, 2H);  $^{13}\text{C NMR}$  (101 MHz,  $\text{CDCl}_3$ )  $\delta$  143.95, 143.12, 136.26, 134.45, 133.94, 130.46, 129.68, 129.34, 129.22, 128.87, 128.56, 127.32, 125.50, 124.91, 121.22, 35.75, 31.69, 31.24, 22.69, 21.70, 14.20; **HRMS (ESI)**  $m/z$  calcd for  $\text{C}_{24}\text{H}_{27}\text{NNaO}_2\text{S}^+$  ( $\text{M}+\text{Na}$ ) $^+$  416.1655, found 416.1656.

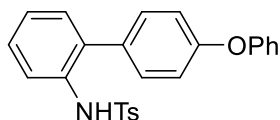

**4-methyl-*N*-(4'-phenoxy-[1,1'-biphenyl]-2-yl)benzenesulfonamide(1as):** white solid; Yield 87%;  $^1\text{H NMR}$  (400 MHz,  $\text{CDCl}_3$ )  $\delta$  7.70 (d,  $J = 8.2$  Hz, 1H), 7.52 (d,  $J = 7.5$  Hz, 2H), 7.41 (t,  $J = 7.3$  Hz, 2H), 7.33 (t,  $J = 7.6$  Hz, 1H), 7.23 – 7.07 (m, 7H), 6.96 (d,  $J = 7.4$  Hz, 2H), 6.82 (d,  $J = 7.4$  Hz, 2H), 6.60 (s, 1H), 2.38 (s, 3H);  $^{13}\text{C NMR}$  (150 MHz,  $\text{CDCl}_3$ )  $\delta$  157.62, 156.51, 144.03, 136.27, 133.93, 133.43, 131.76, 130.53, 130.43, 130.05, 129.70, 128.70, 127.25, 125.03, 124.04, 121.49, 119.61, 118.83, 21.65; **HRMS (ESI)**  $m/z$  calcd for  $\text{C}_{25}\text{H}_{21}\text{NNaO}_3\text{S}^+$  ( $\text{M}+\text{Na}$ ) $^+$  438.1134, found 438.1136.

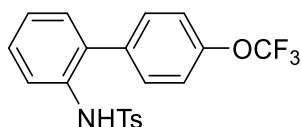

**4-methyl-*N*-(4'-(trifluoromethoxy)-[1,1'-biphenyl]-2-yl)benzenesulfonamide(1at):** white solid; Yield 80%;  $^1\text{H NMR}$  (400 MHz,  $\text{CDCl}_3$ )  $\delta$  7.73 (dd,  $J = 8.2, 1.3$  Hz, 1H), 7.53 – 7.41 (m, 3H), 7.40 (td,  $J = 7.8, 1.7$  Hz, 1H), 7.26 – 7.17 (m, 4H), 7.12 (dd,  $J = 7.6, 1.7$  Hz, 1H), 6.92 (d,  $J = 8.7$  Hz, 2H), 6.50 (s, 1H), 2.45 (s, 3H);  $^{13}\text{C NMR}$  (101 MHz,  $\text{CDCl}_3$ )  $\delta$  149.06, 144.16, 136.33, 136.11, 133.71, 133.12, 132.71, 130.58, 130.45, 129.78, 129.24, 127.23, 125.47, 128.83 – 122.16 (m), 121.52, 21.68;  $^{19}\text{F NMR}$  (376 MHz,  $\text{CDCl}_3$ )  $\delta$  -57.72; **HRMS (ESI)**  $m/z$  calcd for  $\text{C}_{20}\text{H}_{16}\text{F}_3\text{NNaO}_3\text{S}^+$  ( $\text{M}+\text{Na}$ ) $^+$  430.0695, found 430.0699.

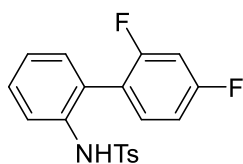

***N*-(2',4'-difluoro-[1,1'-biphenyl]-2-yl)-4-methylbenzenesulfonamide(1au):** white solid; Yield 81%;  $^1\text{H NMR}$  (400 MHz,  $\text{CDCl}_3$ )  $\delta$  7.66 (dd,  $J = 8.1, 1.4$  Hz, 1H), 7.40 (d,  $J = 8.4$  Hz, 2H), 7.21 (td,  $J = 7.5, 1.3$  Hz, 1H), 7.16 – 7.05 (m, 4H), 6.91 – 6.75 (m, 2H), 6.67 (td,  $J = 8.5, 6.4$  Hz, 1H), 6.39 (s, 1H), 2.38 (s, 3H);  $^{13}\text{C NMR}$  (101 MHz,  $\text{CDCl}_3$ )  $\delta$  162.99 (d,  $J = 238.8$  Hz), 159.42 (d,  $J = 260.0$  Hz), 143.88, 136.30, 134.18, 132.55 – 132.40 (m), 132.38, 131.16, 129.79, 129.64, 128.39, 127.11, 126.93 (d,  $J = 105.7$  Hz), 126.01, 124.00, 112.06 (d,  $J = 21.1$  Hz), 104.49 (t,  $J = 25.7$  Hz), 21.65;  $^{19}\text{F NMR}$  (376 MHz,  $\text{CDCl}_3$ )  $\delta$  -109.00, -109.99; **HRMS (ESI)**  $m/z$  calcd for  $\text{C}_{19}\text{H}_{15}\text{F}_2\text{NNaO}_2\text{S}^+$  ( $\text{M}+\text{Na}$ ) $^+$  382.0684, found 382.0689.

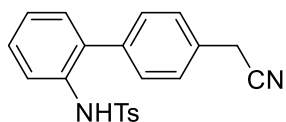

***N*-(4'-(cyanomethyl)-[1,1'-biphenyl]-2-yl)-4-methylbenzenesulfonamide(1av):** white solid; Yield 82%;  $^1\text{H NMR}$  (400 MHz,  $\text{CDCl}_3$ )  $\delta$  7.68 (dd,  $J = 8.2, 1.1$  Hz, 1H), 7.55 – 7.45 (m, 2H), 7.38 – 7.27 (m, 3H), 7.21 (d,  $J = 8.4$  Hz, 2H), 7.16 (td,  $J = 7.5, 1.2$  Hz, 1H), 7.08 (dd,  $J = 7.6, 1.7$  Hz, 1H), 6.92 – 6.86 (m, 2H), 6.52 – 6.48 (m, 1H), 3.80 (s, 2H), 2.41 (s, 3H);  $^{13}\text{C NMR}$  (101 MHz,  $\text{CDCl}_3$ )  $\delta$  144.16, 137.31, 136.21, 133.29, 130.36, 129.97, 129.83, 129.73, 129.05, 128.68, 127.21, 125.24, 121.87, 117.66, 77.48, 77.16, 76.84, 23.45, 21.66; **HRMS (ESI)**  $m/z$  calcd for  $\text{C}_{21}\text{H}_{18}\text{N}_2\text{NaO}_2\text{S}^+$  ( $\text{M}+\text{Na}$ ) $^+$  385.0981, found 385.0987.

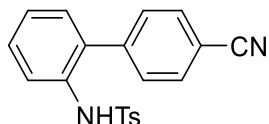

***N*-(4'-cyano-[1,1'-biphenyl]-2-yl)-4-methylbenzenesulfonamide(1aw):** white solid; Yield 72%;  $^1\text{H NMR}$  (400 MHz,  $\text{CDCl}_3$ )  $\delta$  7.63 – 7.56 (m, 3H), 7.46 (d,  $J = 7.5$  Hz, 2H), 7.36 (d,  $J = 7.8$  Hz, 1H), 7.20 (d,  $J = 7.6$  Hz, 3H), 7.09 (d,  $J = 7.6$  Hz, 1H), 7.03 (d,  $J = 7.3$  Hz, 2H), 6.60 (s, 1H), 2.42 (s, 3H);  $^{13}\text{C NMR}$  (150 MHz,  $\text{CDCl}_3$ )  $\delta$  144.15, 142.47, 136.27, 133.54, 133.29, 132.49, 130.22, 129.93, 129.74, 129.60, 127.08, 125.91, 123.62, 118.48, 111.68, 29.70, 21.62; **HRMS (ESI)**  $m/z$  calcd for  $\text{C}_{20}\text{H}_{16}\text{N}_2\text{NaO}_2\text{S}^+$  ( $\text{M}+\text{Na}$ ) $^+$  371.0825, found 371.0825.

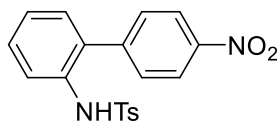

**4-methyl-*N*-(4'-nitro-[1,1'-biphenyl]-2-yl)benzenesulfonamide(1ax):** yellow solid; Yield 70%;  $^1\text{H NMR}$  (400 MHz,  $\text{CDCl}_3$ )  $\delta$  8.16 (d,  $J = 8.8$  Hz, 2H), 7.67 – 7.60 (m, 1H), 7.44 (dd,  $J = 26.7, 7.9$  Hz, 2H), 7.38 (d,  $J = 1.5$  Hz, 1H), 7.28 – 7.18 (m, 3H), 7.11 (ddd,  $J = 14.1, 7.2, 1.7$  Hz, 3H), 6.43 (s, 1H), 2.43 (s, 3H);  $^{13}\text{C NMR}$  (150 MHz,  $\text{CDCl}_3$ )  $\delta$  147.49, 144.47, 144.39, 136.33, 133.44, 133.06, 130.26, 130.20, 129.94, 129.86, 127.20, 126.00, 124.09, 123.59, 77.37, 77.16, 76.95, 21.72; **HRMS (ESI)**  $m/z$  calcd for  $\text{C}_{19}\text{H}_{16}\text{N}_2\text{NaO}_4\text{S}^+$  ( $\text{M}+\text{Na}$ ) $^+$  391.0723, found 391.0722.

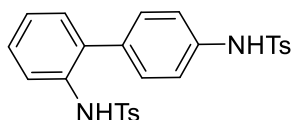

***N,N'*-([1,1'-biphenyl]-2,4'-diyl)bis(4-methylbenzenesulfonamide)(1ay):** white solid; Yield 76%;  $^1\text{H NMR}$  (400 MHz,  $\text{CDCl}_3$ )  $\delta$  7.78 – 7.72 (m, 2H), 7.65 (dd,  $J = 8.2, 1.3$  Hz, 1H), 7.40 – 7.34 (m, 2H), 7.32 (d,  $J = 5.7$  Hz, 2H), 7.16 – 7.07 (m, 4H), 7.09 – 6.96 (m, 4H), 6.75 – 6.67 (m, 2H), 6.44 (d,  $J = 2.7$  Hz, 1H), 2.40 (d,  $J = 10.9$  Hz, 6H);  $^{13}\text{C NMR}$  (101 MHz,  $\text{CDCl}_3$ )  $\delta$  144.54, 144.11, 136.70, 136.11, 134.02, 133.75, 133.43, 130.33, 130.05, 129.70, 128.93, 127.42, 127.21, 125.26, 122.01, 121.46, 77.48, 77.16, 76.84, 21.74, 21.69; **HRMS (ESI)**  $m/z$  calcd for  $\text{C}_{26}\text{H}_{24}\text{N}_2\text{NaO}_4\text{S}_2^+$  ( $\text{M}+\text{Na}$ ) $^+$  515.1070, found 515.1073.

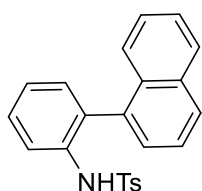

**4-methyl-*N*-(2-(naphthalen-1-yl)phenyl)benzenesulfonamide(1az):** white solid; Yield 77%;  $^1\text{H NMR}$  (400 MHz,  $\text{CDCl}_3$ )  $\delta$  7.92 (t,  $J = 7.1$  Hz, 2H), 7.87 (d,  $J = 8.3$  Hz, 1H), 7.53 (t,  $J = 7.5$  Hz, 1H), 7.44 (dt,  $J = 14.9, 7.6$  Hz, 2H), 7.34 (d,  $J = 8.2$  Hz, 2H), 7.30 (d,  $J = 8.9$  Hz, 1H), 7.23 (t,  $J = 7.4$  Hz, 1H), 7.14 (dd,  $J = 20.9, 9.1$  Hz, 4H), 6.84 (d,  $J = 6.9$  Hz, 1H), 6.27 (s, 1H), 2.41 (s, 3H);  $^{13}\text{C NMR}$  (101 MHz,  $\text{CDCl}_3$ )  $\delta$  143.82, 136.07, 134.84, 134.26, 133.82, 131.73, 131.71, 131.26, 129.57, 129.06, 129.04, 128.63, 127.48, 127.31, 127.01, 126.42, 125.54, 125.10, 124.84, 121.22, 21.69; **HRMS (ESI)**  $m/z$  calcd for  $\text{C}_{23}\text{H}_{19}\text{NNaO}_2\text{S}^+$  ( $\text{M}+\text{Na}$ ) $^+$  396.1029, found 396.1032.

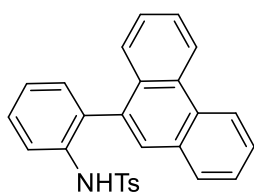

**4-methyl-N-(2-(phenanthren-9-yl)phenyl)benzenesulfonamide(1aa')**: white solid; Yield 78%;  $^1\text{H NMR}$  (400 MHz,  $\text{CDCl}_3$ )  $\delta$  8.78 (dd,  $J = 12.2, 8.3$  Hz, 2H), 7.93 (d,  $J = 8.2$  Hz, 1H), 7.76 (ddd,  $J = 8.3, 5.3, 3.1$  Hz, 1H), 7.72 – 7.64 (m, 3H), 7.55 – 7.46 (m, 1H), 7.46 – 7.38 (m, 1H), 7.32 – 7.24 (m, 3H), 7.26 – 7.17 (m, 2H), 7.08 – 6.97 (m, 3H), 6.31 (s, 1H), 2.44 (s, 3H);  $^{13}\text{C NMR}$  (150 MHz,  $\text{CDCl}_3$ )  $\delta$  143.61, 135.90, 134.78, 132.83, 132.01, 131.14, 130.99, 130.57, 130.42, 130.31, 129.40, 129.01, 128.51, 128.14, 127.39, 127.32, 127.12, 127.08, 127.05, 125.80, 125.14, 123.22, 122.71, 121.85, 21.67; **HRMS (ESI)**  $m/z$  calcd for  $\text{C}_{27}\text{H}_{21}\text{NNaO}_2\text{S}^+$  ( $\text{M}+\text{Na}$ ) $^+$  446.1185, found 446.1187.

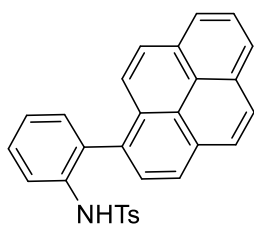

**4-methyl-N-(2-(pyren-1-yl)phenyl)benzenesulfonamide(1ab')**: grey solid; Yield 58%;  $^1\text{H NMR}$  (400 MHz,  $\text{CDCl}_3$ )  $\delta$  8.31 (d,  $J = 7.6$  Hz, 1H), 8.24 – 8.05 (m, 5H), 7.93 (dd,  $J = 10.8, 8.7$  Hz, 2H), 7.54 – 7.51 (m, 1H), 7.42 (dd,  $J = 8.4, 2.9$  Hz, 2H), 7.32 – 7.30 (m, 4H), 7.03 (d,  $J = 8.4$  Hz, 2H), 6.39 (d,  $J = 3.2$  Hz, 1H), 2.37 (s, 3H);  $^{13}\text{C NMR}$  (101 MHz,  $\text{CDCl}_3$ )  $\delta$  143.86, 136.12, 134.99, 132.27, 131.70, 131.53, 131.44, 131.37, 130.87, 129.53, 129.30, 129.19, 128.60, 128.33, 127.37, 127.35, 127.22, 126.53, 125.87, 125.57, 124.95, 124.62, 124.09, 121.47, 21.64; **HRMS (ESI)**  $m/z$  calcd for  $\text{C}_{29}\text{H}_{21}\text{NNaO}_2\text{S}^+$  ( $\text{M}+\text{Na}$ ) $^+$  470.1185, found 470.1189.

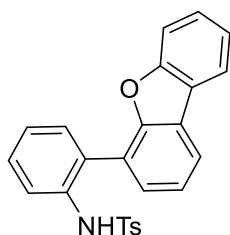

**N-(2-(dibenzo[b,d]furan-4-yl)phenyl)-4-methylbenzenesulfonamide(1ac')**: white solid; Yield 81%;  $^1\text{H NMR}$  (400 MHz,  $\text{CDCl}_3$ )  $\delta$  8.02 (d,  $J = 7.7$  Hz, 1H), 7.96 (d,  $J = 7.7$  Hz, 1H), 7.86 (d,  $J = 8.1$  Hz, 1H), 7.52 (d,  $J = 4.9$  Hz, 3H), 7.42 (t,  $J = 6.8$  Hz, 1H), 7.34 (d,  $J = 4.0$  Hz, 2H), 7.28 (t,  $J = 7.6$  Hz, 1H), 7.18 (d,  $J = 7.8$  Hz, 2H), 7.02 (s, 1H), 6.91 (d,  $J = 7.8$  Hz, 2H), 6.86 (d,  $J = 7.4$  Hz, 1H), 2.21 (s, 3H);  $^{13}\text{C NMR}$  (150 MHz,  $\text{CDCl}_3$ )  $\delta$  155.83, 152.62, 143.30, 135.77, 133.88, 131.15, 130.60, 129.29, 129.23, 127.97, 127.71, 126.59, 126.34, 125.43, 124.59, 123.89, 123.33, 123.28, 121.75, 120.92, 120.54, 111.94, 21.29; **HRMS (ESI)**  $m/z$  calcd for  $\text{C}_{25}\text{H}_{19}\text{NNaO}_3\text{S}^+$  ( $\text{M}+\text{Na}$ ) $^+$  436.0978, found 436.0981.

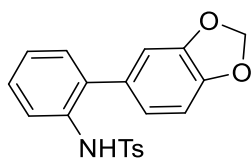

**N-(2-(benzo[d][1,3]dioxol-5-yl)phenyl)-4-methylbenzenesulfonamide(1ad')**: white solid; Yield 82%;  $^1\text{H NMR}$  (400 MHz,  $\text{CDCl}_3$ )  $\delta$  7.68 (d,  $J = 8.2$  Hz, 1H), 7.48 (d,  $J = 7.5$  Hz, 2H), 7.30 (t,  $J = 7.7$  Hz, 1H), 7.19 (d,  $J = 7.8$  Hz, 2H), 7.11 (t,  $J = 7.4$  Hz, 1H), 7.05 (d,  $J = 7.5$  Hz, 1H), 6.76 (d,  $J = 7.8$  Hz, 1H), 6.64 (s, 1H), 6.34 (d,  $J = 7.9$  Hz, 1H), 6.19 (s, 1H), 6.00 (s, 2H), 2.39 (s, 3H);  $^{13}\text{C NMR}$  (150 MHz,  $\text{CDCl}_3$ )  $\delta$  148.17, 147.50, 144.01, 136.07, 133.91, 133.75, 130.76, 130.37, 129.62, 128.56, 127.17, 124.97, 122.20, 121.61, 109.43, 108.72, 101.40, 21.57; **HRMS (ESI)**  $m/z$  calcd for  $\text{C}_{20}\text{H}_{17}\text{NNaO}_4\text{S}^+$  ( $\text{M}+\text{Na}$ ) $^+$  390.0770, found 390.0774.

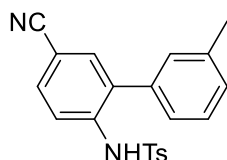

***N*-(5-cyano-3'-methyl-[1,1'-biphenyl]-2-yl)-4-methylbenzenesulfonamide(1ca):** white solid; Yield 73%;  $^1\text{H NMR}$  (400 MHz,  $\text{CDCl}_3$ )  $\delta$  7.79 (d,  $J = 8.6$  Hz, 1H), 7.61 – 7.51 (m, 4H), 7.38 (d,  $J = 2.1$  Hz, 1H), 7.32 (t,  $J = 7.6$  Hz, 1H), 7.26 (d,  $J = 15.3$  Hz, 2H), 6.81 (s, 1H), 6.75 (dt,  $J = 7.5, 1.7$  Hz, 1H), 6.71 – 6.67 (m, 1H), 2.43 (s, 3H), 2.35 (s, 3H);  $^{13}\text{C NMR}$  (101 MHz,  $\text{CDCl}_3$ )  $\delta$  144.84, 139.65, 138.34, 135.78, 134.81, 134.13, 133.74, 132.55, 130.11, 130.06, 129.65, 129.50, 127.29, 125.84, 119.81, 118.52, 107.78, 21.76, 21.54; **HRMS (ESI)**  $m/z$  calcd for  $\text{C}_{21}\text{H}_{18}\text{N}_2\text{NaO}_2\text{S}^+$  ( $\text{M}+\text{Na}$ ) $^+$  385.0981, found 385.0985.

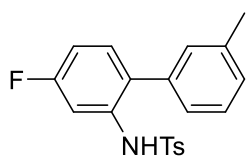

***N*-(4-fluoro-3'-methyl-[1,1'-biphenyl]-2-yl)-4-methylbenzenesulfonamide(1cb):** white solid; Yield 62%;  $^1\text{H NMR}$  (400 MHz,  $\text{CDCl}_3$ )  $\delta$  7.60 – 7.50 (m, 3H), 7.34 – 7.24 (m, 4H), 7.25 – 7.18 (m, 1H), 7.07 (dd,  $J = 8.5, 6.3$  Hz, 1H), 6.86 (td,  $J = 8.2, 2.6$  Hz, 1H), 6.71 (dt,  $J = 7.3, 1.7$  Hz, 1H), 6.66 – 6.60 (m, 1H), 2.45 (s, 3H), 2.36 (s, 3H);  $^{13}\text{C NMR}$  (101 MHz,  $\text{CDCl}_3$ )  $\delta$  162.51 (d,  $J = 246.3$  Hz), 161.29, 144.31, 139.11, 136.14 (d,  $J = 32.3$  Hz), 135.32 (d,  $J = 10.8$  Hz), 131.42 (d,  $J = 9.1$  Hz), 111.60 (d,  $J = 21.1$  Hz), 108.09 (d,  $J = 26.5$  Hz), 129.84, 129.26, 127.33, 126.17, 111.60 (d,  $J = 21.1$  Hz), 108.09 (d,  $J = 26.5$  Hz), 21.72, 21.52;  $^{19}\text{F NMR}$  (376 MHz,  $\text{CDCl}_3$ )  $\delta$  -111.86; **HRMS (ESI)**  $m/z$  calcd for  $\text{C}_{20}\text{H}_{18}\text{FNNaO}_2\text{S}^+$  ( $\text{M}+\text{Na}$ ) $^+$  378.0934, found 378.0934.

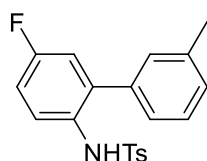

***N*-(5-fluoro-3'-methyl-[1,1'-biphenyl]-2-yl)-4-methylbenzenesulfonamide(1cc):** white solid; Yield 61%;  $^1\text{H NMR}$  (400 MHz,  $\text{CDCl}_3$ )  $\delta$  7.76 (dd,  $J = 9.0, 5.2$  Hz, 1H), 7.44 – 7.37 (m, 2H), 7.29 – 7.17 (m, 5H), 7.09 (ddd,  $J = 9.0, 7.9, 3.0$  Hz, 1H), 6.84 (dd,  $J = 8.8, 3.1$  Hz, 1H), 6.63 (dt,  $J = 7.3, 1.8$  Hz, 1H), 6.51 (q,  $J = 1.4, 1.0$  Hz, 1H), 2.46 (s, 3H), 2.33 (s, 3H);  $^{13}\text{C NMR}$  (101 MHz,  $\text{CDCl}_3$ )  $\delta$  159.95 (d,  $J = 245.9$  Hz), 143.98, 139.01, 136.84, 136.25, 135.96, 129.69, 129.34, 129.29, 129.12, 127.29, 125.64, 124.49 (d,  $J = 8.3$  Hz), 116.95 (d,  $J = 22.8$  Hz), 115.40 (d,  $J = 22.4$  Hz), 21.71, 21.52;  $^{19}\text{F NMR}$  (376 MHz,  $\text{CDCl}_3$ )  $\delta$  -116.98; **HRMS (ESI)**  $m/z$  calcd for  $\text{C}_{20}\text{H}_{18}\text{FNNaO}_2\text{S}^+$  ( $\text{M}+\text{Na}$ ) $^+$  378.0934, found 378.0935.

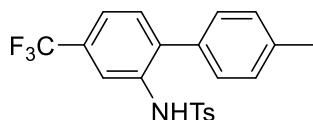

**4-methyl-*N*-(4'-methyl-4-(trifluoromethyl)-[1,1'-biphenyl]-2-yl)benzenesulfonamide(1cd):** white solid; Yield 59%;  $^1\text{H NMR}$  (400 MHz,  $\text{CDCl}_3$ )  $\delta$  7.60 – 7.48 (m, 3H), 7.45 (d,  $J = 8.3$  Hz, 2H), 7.18 (d,  $J = 8.3$  Hz, 2H), 6.99 (dt,  $J = 16.1, 8.1$  Hz, 4H), 6.40 (s, 1H), 2.41 (d,  $J = 5.3$  Hz, 6H);  $^{13}\text{C NMR}$  (101 MHz,  $\text{CDCl}_3$ )  $\delta$  144.12, 141.38, 139.72, 136.34, 133.28, 131.11 (q,  $J = 32.1$  Hz), 130.63, 130.08, 129.76, 129.56, 127.45, 127.19, 126.58, 125.90 (d,  $J = 3.8$  Hz), 123.65, 123.50 (q,  $J = 272.3$  Hz), 21.68, 21.52.  $^{19}\text{F NMR}$  (376 MHz,  $\text{CDCl}_3$ )  $\delta$  -62.61; **HRMS (ESI)**  $m/z$  calcd for  $\text{C}_{21}\text{H}_{19}\text{F}_3\text{NO}_2\text{S}^+$  ( $\text{M}+\text{H}$ ) $^+$  406.1083, found 406.1083.

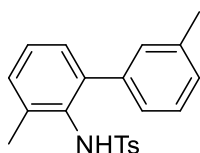

***N*-(3,3'-dimethyl-[1,1'-biphenyl]-2-yl)-4-methylbenzenesulfonamide(1ce)** : white solid; Yield 73%;  $^1\text{H NMR}$  (400 MHz,  $\text{CDCl}_3$ )  $\delta$  7.28 (dd,  $J = 7.6, 2.2$  Hz, 1H), 7.21 (q,  $J = 7.6, 7.0$  Hz, 1H), 7.12 – 6.90 (m, 7H), 6.65 – 6.59 (m, 2H), 6.50 (d,  $J = 2.0$  Hz, 1H), 2.57 (d,  $J = 18.8$  Hz, 3H), 2.40 (d,  $J = 12.6$  Hz, 3H), 2.22 (s, 3H);  $^{13}\text{C NMR}$  (101 MHz,  $\text{CDCl}_3$ )  $\delta$  142.88, 140.57, 138.89, 138.86, 138.24, 136.69, 131.18, 130.97, 129.31, 129.22, 128.40, 128.37, 127.82, 127.50, 127.13, 125.42, 21.69, 21.54, 20.10; **HRMS (ESI)**  $m/z$  calcd for  $\text{C}_{21}\text{H}_{21}\text{NNaO}_2\text{S}^+$  ( $\text{M}+\text{Na}$ ) $^+$  374.1185, found 374.1187.

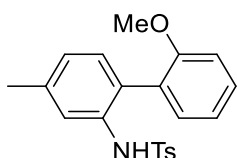

***N*-(2'-methoxy-4-methyl-[1,1'-biphenyl]-2-yl)-4-methylbenzenesulfonamide(1cf)**: white solid; Yield 70%;  $^1\text{H NMR}$  (400 MHz,  $\text{CDCl}_3$ )  $\delta$  7.52 – 7.48 (m, 1H), 7.32 – 7.19 (m, 1H), 7.17 – 7.10 (m, 2H), 7.07 – 6.98 (m, 2H), 6.98 – 6.80 (m, 4H), 6.75 (td,  $J = 7.5, 1.1$  Hz, 1H), 6.39 (dd,  $J = 7.5, 1.8$  Hz, 1H), 3.80 (s, 3H), 2.41 (s, 3H), 2.33 (s, 3H);  $^{13}\text{C NMR}$  (101 MHz,  $\text{CDCl}_3$ )  $\delta$  155.18, 142.99, 138.78, 136.22, 133.96, 131.84, 130.90, 130.57, 129.31, 127.36, 127.03, 126.75, 126.27, 121.34, 111.20, 56.22, 21.58, 21.35; **HRMS (ESI)**  $m/z$  calcd for  $\text{C}_{21}\text{H}_{21}\text{NNaO}_3\text{S}^+$  ( $\text{M}+\text{Na}$ ) $^+$  390.1134, found 390.1135.

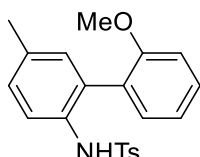

***N*-(2'-methoxy-5-methyl-[1,1'-biphenyl]-2-yl)-4-methylbenzenesulfonamide(1fa)**: white solid; Yield 72%;  $^1\text{H NMR}$  (400 MHz,  $\text{CDCl}_3$ )  $\delta$  7.47 (d,  $J = 8.2$  Hz, 1H), 7.23 – 7.15 (m, 1H), 7.13 – 7.00 (m, 3H), 6.91 – 6.80 (m, 4H), 6.78 (d,  $J = 2.4$  Hz, 1H), 6.66 (td,  $J = 7.5, 1.2$  Hz, 1H), 6.30 (dd,  $J = 7.5, 1.8$  Hz, 1H), 3.71 (s, 3H), 2.24 (d,  $J = 5.4$  Hz, 6H);  $^{13}\text{C NMR}$  (101 MHz,  $\text{CDCl}_3$ )  $\delta$  155.07, 142.90, 136.34, 136.21, 133.55, 131.77, 131.71, 131.61, 129.41, 129.36, 129.31, 127.21, 126.75, 125.99, 121.31, 111.14, 56.24, 21.58, 21.08; **HRMS (ESI)**  $m/z$  calcd for  $\text{C}_{21}\text{H}_{21}\text{NNaO}_3\text{S}^+$  ( $\text{M}+\text{Na}$ ) $^+$  390.1134, found 390.1134.

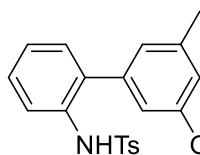

***N*-(3'-methoxy-5'-methyl-[1,1'-biphenyl]-2-yl)-4-methylbenzenesulfonamide(1fe)**: white solid; Yield 73%;  $^1\text{H NMR}$  (400 MHz,  $\text{CDCl}_3$ )  $\delta$  7.74 (dt,  $J = 8.2, 1.5$  Hz, 1H), 7.45 (dd,  $J = 8.4, 2.3$  Hz, 2H), 7.31 (tt,  $J = 8.1, 2.1$  Hz, 1H), 7.22 – 7.01 (m, 4H), 6.72 (dd,  $J = 18.0, 2.0$  Hz, 2H), 6.40 – 5.93 (m, 2H), 3.74 (d,  $J = 2.4$  Hz, 3H), 2.37 (d,  $J = 2.4$  Hz, 3H), 2.28 (d,  $J = 2.4$  Hz, 3H);  $^{13}\text{C NMR}$  (101 MHz,  $\text{CDCl}_3$ )  $\delta$  159.92, 143.73, 140.14, 138.15, 136.00, 134.13, 133.59, 129.96, 129.47, 128.46, 127.04, 124.88, 121.62, 121.50, 114.16, 111.63, 77.48, 77.16, 76.84, 55.11, 21.48, 21.45; **HRMS (ESI)**  $m/z$  calcd for  $\text{C}_{21}\text{H}_{21}\text{NNaO}_3\text{S}^+$  ( $\text{M}+\text{Na}$ ) $^+$  390.1134, found 390.1135.

## 5.2 General procedure B

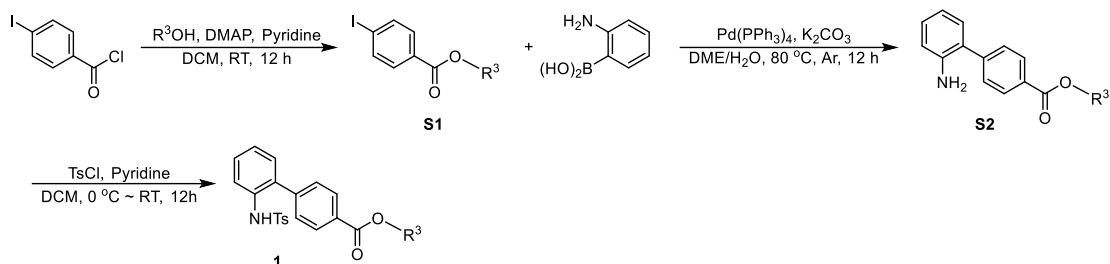

A dry round bottom flask equipped with a magnetic stirrer bar was charged with alcohol (1.0 equiv), pyridine (5 equiv), and DMAP (2 mol%) in  $\text{CH}_2\text{Cl}_2$  (0.1 M). 4-Iodobenzoyl chloride (1.2 equiv) was added and the resulting mixture stirring at 25 °C for 12 h. The reaction mixture was poured into water and extracted with  $\text{CH}_2\text{Cl}_2$  (3-5 times), dried over anhydrous  $\text{Na}_2\text{SO}_4$ , and concentrated under reduced pressure. The residue was purified by column chromatography on silica gel to give the desired product **S1**.

A dry round bottom flask flushed with argon and equipped with a magnetic stirrer bar and a septum was charged with arylboronic acid (1.5 equiv),  $\text{K}_2\text{CO}_3$  (4.0 equiv), and  $\text{Pd}(\text{PPh}_3)_4$  (10 mol%). A mixture of DME and  $\text{H}_2\text{O}$  (DME :  $\text{H}_2\text{O}$  = 1:1, 0.25 M), **S1** (1.0 equiv) were added, and the resulting mixture was heated to 80 °C for 12 h. The reaction mixture was poured into water and extracted with  $\text{CH}_2\text{Cl}_2$  (3-5 times), dried over anhydrous  $\text{Na}_2\text{SO}_4$ , and concentrated under reduced pressure. The residue was purified by column chromatography on silica gel to give the desired product **S2**.

A dry round bottom flask equipped with a magnetic stirrer bar was charged with **S2** (1.0 equiv), DMAP (2 mol%) and pyridine (5.0 equiv) in  $\text{CH}_2\text{Cl}_2$  (0.2 M). 4-toluenesulfonyl chloride (1.1 equiv) was added at 0 °C. After being stirred at 25 °C for 12 h, the reaction mixture was poured into water and extracted with  $\text{CH}_2\text{Cl}_2$  (3-5 times), dried over anhydrous  $\text{Na}_2\text{SO}_4$ , and concentrated under reduced pressure. The residue was purified by column chromatography on silica gel to give the corresponding product **1**.

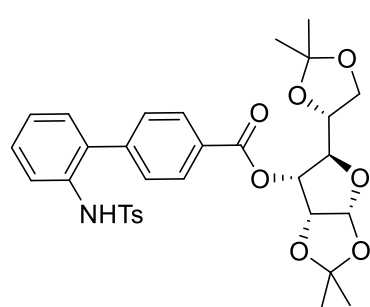

**(3aR,5R,6R,6aR)-5-((R)-2,2-dimethyl-1,3-dioxolan-4-yl)-2,2-dimethyltetrahydrofuro[2,3-*d*][1,3]dioxol-6-yl 2'-((4-methylphenyl)sulfonamido)-[1,1'-biphenyl]-4-carboxylate (**1ff**):**

white solid; Yield 63%;  $^1\text{H NMR}$  (400 MHz,  $\text{CDCl}_3$ )  $\delta$  8.09 (d,  $J$  = 8.4 Hz, 1H), 7.97 – 7.91 (m, 2H), 7.70 – 7.56 (m, 1H), 7.42 (dd,  $J$  = 8.4, 2.1 Hz, 2H), 7.31 (td,  $J$  = 7.8, 1.7 Hz, 1H), 7.15 (dt,  $J$  = 7.5, 2.6 Hz, 2H), 7.07 (dd,  $J$  = 7.7, 1.7 Hz, 1H), 7.00 – 6.94 (m, 2H), 6.61 (dd,  $J$  = 10.4, 6.4 Hz, 1H), 5.95 (q,  $J$  = 3.1, 2.4 Hz, 1H), 5.50 (d,  $J$  = 3.1 Hz, 1H), 4.63 (t,  $J$  = 3.4 Hz, 1H), 4.42 – 4.28 (m, 2H), 4.16 – 4.01 (m, 2H), 2.37 (s, 3H), 1.53 (s, 3H), 1.40 (s, 3H), 1.29 (d,  $J$  = 13.2 Hz, 6H);  $^{13}\text{C NMR}$  (101 MHz,  $\text{CDCl}_3$ )  $\delta$  164.79, 144.23, 142.81, 136.21, 133.60, 133.20, 130.43, 130.16, 129.80, 129.47, 129.36, 127.55, 127.25, 125.43, 122.22, 112.56, 109.63, 105.27, 83.50, 80.03, 76.84, 72.68, 67.42, 27.02, 26.84, 26.32, 25.40, 21.69; **HRMS (ESI)**  $m/z$  calcd for  $\text{C}_{32}\text{H}_{35}\text{KNO}_9\text{S}^+$  ( $\text{M}+\text{K}$ ) $^+$  648.1664, found 648.1669.



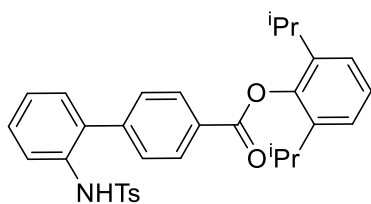

**2,6-diisopropylphenyl 2'-((4-methylphenyl)sulfonamido)-[1,1'-biphenyl]-4-carboxylate(1fg):** white solid; Yield 70%;  $^1\text{H NMR}$  (400 MHz,  $\text{CDCl}_3$ )  $\delta$  8.26 – 8.19 (m, 2H), 7.75 (dd,  $J = 8.3, 1.3$  Hz, 1H), 7.58 – 7.51 (m, 2H), 7.40 (td,  $J = 7.8, 1.8$  Hz, 1H), 7.33 – 7.28 (m, 2H), 7.22 (ddd,  $J = 14.1, 6.7, 2.3$  Hz, 4H), 7.15 (dd,  $J = 7.6, 1.7$  Hz, 1H), 7.05 (dq,  $J = 8.3, 2.0$  Hz, 2H), 6.49 (s, 1H), 3.03 (hept,  $J = 6.9$  Hz, 2H), 2.43 (s, 3H), 1.27 (dd,  $J = 6.8, 2.2$  Hz, 12H);  $^{13}\text{C NMR}$  (101 MHz,  $\text{CDCl}_3$ )  $\delta$  164.80, 145.83, 144.34, 142.88, 140.61, 136.21, 133.71, 133.13, 130.96, 130.19, 129.86, 129.56, 129.19, 127.33, 126.89, 125.38, 124.23, 122.05, 27.81, 24.10, 22.86, 21.73; **HRMS (ESI)**  $m/z$  calcd for  $\text{C}_{32}\text{H}_{33}\text{KNO}_4\text{S}^+$  ( $\text{M}+\text{K}$ ) $^+$  566.1762, found 566.1762.

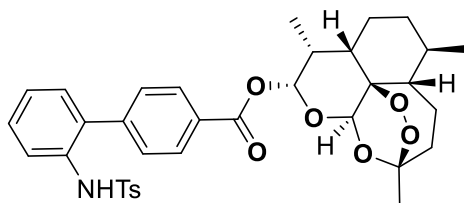

**(3R,5aR,6S,8aR,9S,12S,12aS)-3,6,9-trimethyldecahydro-12H-3,12-epoxy[1,2]dioxepino[4,3-*i*]isochromen-10-yl 2'-((4-methylphenyl)sulfonamido)-[1,1'-biphenyl]-4-carboxylate(1fh):** colorless oil; Yield 88%;  $^1\text{H NMR}$  (400 MHz,  $\text{CDCl}_3$ )  $\delta$  8.00 (dd,  $J = 8.3, 2.2$  Hz, 2H), 7.66 (dd,  $J = 8.1, 2.1$  Hz, 1H), 7.48 – 7.37 (m, 2H), 7.37 – 7.25 (m, 1H), 7.19 – 7.12 (m, 3H), 7.07 (dd,  $J = 7.6, 1.4$  Hz, 1H), 6.91 (d,  $J = 8.3$  Hz, 2H), 6.68 – 6.63 (m, 1H), 5.99 (d,  $J = 1.5$  Hz, 1H), 5.51 (s, 1H), 2.79 – 2.69 (m, 2H), 2.37 (s, 3H), 2.12 – 1.99 (m, 3H), 1.93 – 1.60 (m, 4H), 1.51 – 1.24 (m, 6H), 0.93 (dd,  $J = 9.8, 5.9$  Hz, 6H);  $^{13}\text{C NMR}$  (101 MHz,  $\text{CDCl}_3$ )  $\delta$  164.88, 144.25, 142.54, 136.14, 133.60, 133.47, 130.86, 130.21, 130.05, 129.83, 129.41, 129.08, 127.22, 125.47, 122.53, 104.64, 92.91, 91.79, 80.35, 51.76, 45.45, 37.43, 36.37, 34.24, 32.16, 26.10, 24.72, 22.21, 21.74, 20.39, 12.43; **HRMS (ESI)**  $m/z$  calcd for  $\text{C}_{35}\text{H}_{39}\text{KNO}_8\text{S}^+$  ( $\text{M}+\text{K}$ ) $^+$  672.2028, found 672.2030.

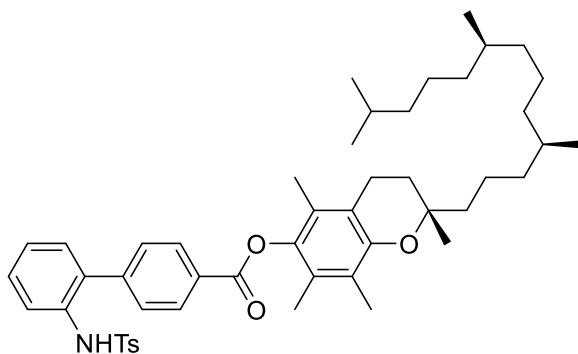

**2,5,7,8-tetramethyl-2-(4,8,12-trimethyltridecyl)chroman-6-yl 2'-((4-methylphenyl)sulfonamido)-[1,1'-biphenyl]-4-carboxylate(1fi):** colorless oil; Yield 66%;  $^1\text{H NMR}$  (400 MHz,  $\text{CDCl}_3$ )  $\delta$  8.25 (d,  $J = 8.3$  Hz, 2H), 7.78 (dd,  $J = 8.2, 1.1$  Hz, 1H), 7.59 – 7.52 (m, 2H), 7.43 (td,  $J = 7.8, 1.7$  Hz, 1H), 7.25 (dd,  $J = 7.7, 6.1$  Hz, 3H), 7.19 (dd,  $J = 7.6, 1.7$  Hz, 1H), 7.10 – 7.04 (m, 2H), 6.59 (s, 1H), 2.70 (t,  $J = 6.8$  Hz, 2H), 2.46 (s, 3H), 2.22 – 2.10 (m, 9H), 1.88 (ddp,  $J = 19.5, 13.4, 6.8, 6.3$  Hz, 2H), 1.73 – 1.07 (m, 24H), 0.92 (t,  $J = 6.0$  Hz, 12H);  $^{13}\text{C NMR}$  (101 MHz,  $\text{CDCl}_3$ )  $\delta$  164.74, 149.69, 144.20, 142.67, 140.64, 136.23, 133.63, 133.41, 130.83, 130.17, 129.79, 129.40, 129.38, 129.32, 127.25, 126.92, 125.44, 125.18, 123.33, 122.40, 117.68, 75.24, 39.47, 37.64, 37.55, 37.49, 37.39, 32.87, 32.81, 28.08, 24.92, 24.55, 22.84, 22.75, 21.67, 21.16, 20.76, 19.87, 19.81, 13.23, 12.39, 12.00; **HRMS (ESI)**  $m/z$  calcd for  $\text{C}_{49}\text{H}_{65}\text{KNO}_5\text{S}^+$  ( $\text{M}+\text{K}$ ) $^+$  818.4215, found 818.4213.

## 6. Synthesis of carbazoles (2)

### 6.1 Reaction optimization

**Table S1.** Optimization of the Reaction Conditions<sup>a</sup>

Reaction scheme: **1a** (NHTs)  $\xrightarrow[\text{Solvent, hv, RT}]{\text{Pd-catalyst, Oxidant}}$  **2a** (Carbazole)

| Entry | Pd-Catalyst          | Oxidant                           | Solvent              | h $\nu$   | Yield (%) <sup>b</sup> | Entry           | Pd-Catalyst                           | Oxidant               | Solvent | h $\nu$   | Yield (%) <sup>b</sup> |
|-------|----------------------|-----------------------------------|----------------------|-----------|------------------------|-----------------|---------------------------------------|-----------------------|---------|-----------|------------------------|
| 1     | Pd(OAc) <sub>2</sub> | <b>O1</b>                         | DMSO                 | -         | 7                      | 21              | Pd(OAc) <sub>2</sub>                  | PhI(OAc) <sub>2</sub> | MeCN    | Blue LEDs | 49                     |
| 2     | Pd(OAc) <sub>2</sub> | <b>O1</b>                         | DMF                  | -         | 11                     | 22              | Pd(OAc) <sub>2</sub>                  | <b>TBPB</b>           | MeCN    | Blue LEDs | 10                     |
| 3     | Pd(OAc) <sub>2</sub> | <b>O1</b>                         | DCE                  | -         | 6                      | 23              | Pd(OAc) <sub>2</sub>                  | <b>TBPA</b>           | MeCN    | Blue LEDs | <5                     |
| 4     | Pd(OAc) <sub>2</sub> | <b>O1</b>                         | Toluene              | -         | 6                      | 24              | Pd(OAc) <sub>2</sub>                  | <b>DTPB</b>           | MeCN    | Blue LEDs | 17                     |
| 5     | Pd(OAc) <sub>2</sub> | <b>O1</b>                         | DCM                  | -         | 5                      | 25              | Pd(OAc) <sub>2</sub>                  | <b>TBHP</b>           | MeCN    | Blue LEDs | <5                     |
| 6     | Pd(OAc) <sub>2</sub> | <b>O1</b>                         | MeCN                 | -         | 70 / 90 <sup>c</sup>   | 26              | Pd(OAc) <sub>2</sub>                  | <b>BPO</b>            | MeCN    | Blue LEDs | <5                     |
| 7     | Pd(OAc) <sub>2</sub> | <b>O1</b>                         | MeCN                 | Blue LEDs | 94                     | 27              | Pd(OAc) <sub>2</sub>                  | <b>LPO</b>            | MeCN    | Blue LEDs | 39                     |
| 8     | Pd(OAc) <sub>2</sub> | <b>O1</b>                         | PhCN                 | Blue LEDs | 80                     | 28              | Pd(TFA) <sub>2</sub>                  | <b>O1</b>             | MeCN    | Blue LEDs | 86                     |
| 9     | Pd(OAc) <sub>2</sub> | <b>O1</b>                         | PhCH <sub>2</sub> CN | Blue LEDs | 75                     | 29              | PdCl <sub>2</sub>                     | <b>O1</b>             | MeCN    | Blue LEDs | 10                     |
| 10    | Pd(OAc) <sub>2</sub> | <b>O2</b>                         | MeCN                 | Blue LEDs | 84                     | 30              | Pd(MeCN) <sub>2</sub> Cl <sub>2</sub> | <b>O1</b>             | MeCN    | Blue LEDs | 12                     |
| 11    | Pd(OAc) <sub>2</sub> | <b>O3</b>                         | MeCN                 | Blue LEDs | 76                     | 31              | Pd(acac) <sub>2</sub>                 | <b>O1</b>             | MeCN    | Blue LEDs | 69                     |
| 12    | Pd(OAc) <sub>2</sub> | <b>O4</b>                         | MeCN                 | Blue LEDs | 90                     | 32 <sup>d</sup> | Pd(OAc) <sub>2</sub>                  | <b>O1</b>             | MeCN    | Blue LEDs | 51                     |
| 13    | Pd(OAc) <sub>2</sub> | <b>O5</b>                         | MeCN                 | Blue LEDs | 88                     | 33 <sup>e</sup> | Pd(OAc) <sub>2</sub>                  | <b>O1</b>             | MeCN    | Blue LEDs | 64                     |
| 14    | Pd(OAc) <sub>2</sub> | <b>O6</b>                         | MeCN                 | Blue LEDs | 92                     | 34 <sup>f</sup> | Pd(OAc) <sub>2</sub>                  | <b>O1</b>             | MeCN    | Blue LEDs | 90                     |
| 15    | Pd(OAc) <sub>2</sub> | <b>O7</b>                         | MeCN                 | Blue LEDs | 90                     | 35 <sup>g</sup> | Pd(OAc) <sub>2</sub>                  | <b>O1</b>             | MeCN    | Blue LEDs | <b>98</b>              |
| 16    | Pd(OAc) <sub>2</sub> | <b>O8</b>                         | MeCN                 | Blue LEDs | 83                     | 36 <sup>h</sup> | Pd(OAc) <sub>2</sub>                  | <b>O1</b>             | MeCN    | Blue LEDs | 94                     |
| 17    | Pd(OAc) <sub>2</sub> | <b>PPO</b>                        | MeCN                 | Blue LEDs | 80                     | 37 <sup>i</sup> | Pd(OAc) <sub>2</sub>                  | <b>O1</b>             | MeCN    | Blue LEDs | 86                     |
| 18    | Pd(OAc) <sub>2</sub> | <b>NFSI</b>                       | MeCN                 | Blue LEDs | 23                     | 38 <sup>j</sup> | Pd(OAc) <sub>2</sub>                  | <b>O1</b>             | MeCN    | Blue LEDs | 81                     |
| 19    | Pd(OAc) <sub>2</sub> | <b>H<sub>2</sub>O<sub>2</sub></b> | MeCN                 | Blue LEDs | <5                     | 39 <sup>k</sup> | Pd(OAc) <sub>2</sub>                  | <b>O1</b>             | MeCN    | Blue LEDs | 95                     |
| 20    | Pd(OAc) <sub>2</sub> | <b>m-CPBA</b>                     | MeCN                 | Blue LEDs | 40                     |                 |                                       |                       |         |           |                        |

Chemical structures: **TBPB**, **TBPA**, **DTPB**, **TBHP**, **BPO**, **LPO**

<sup>a</sup>Reaction conditions: **1a** (0.10 mmol, 1.0 equiv), Pd(OAc)<sub>2</sub> (0.01 mmol, 10 mol%), oxidant (0.20 mmol, 2.0 equiv) and solvent (1 mL), irradiation with blue LEDs for 6 h at room temperature.

<sup>b</sup>Isolated yields. <sup>c</sup>24 h. <sup>d</sup>Oxidant (1 equiv). <sup>e</sup>Oxidant (1.2 equiv). <sup>f</sup>Oxidant (1.4 equiv). <sup>g</sup>Oxidant (1.6 equiv). <sup>h</sup>Oxidant (1.8 equiv). <sup>i</sup>Solvent (0.2 M), **O1** (1.6 equiv). <sup>j</sup>Solvent (0.07 M), **O1** (1.6 equiv).

<sup>k</sup>Pd(OAc)<sub>2</sub> (5 mol%), **O1** (1.6 equiv), 24 h.

**Table S2.** Effect of Nitrogen-Protecting Groups on the Carbazole Synthesis<sup>a</sup>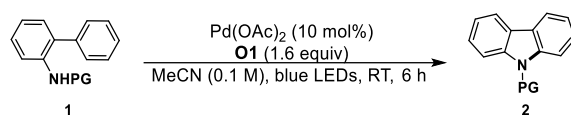

| Entry | PG                                                        | Product   | Yield (%) <sup>b</sup> | Predicted pK <sub>a</sub> <sup>c</sup> |
|-------|-----------------------------------------------------------|-----------|------------------------|----------------------------------------|
| 1     | Ts                                                        | <b>2a</b> | 98                     | 17.69                                  |
| 2     | H                                                         | <b>2b</b> | 80                     | 26.03                                  |
| 3     | PhSO <sub>2</sub>                                         | <b>2c</b> | 94                     | 17.45                                  |
| 4     | Ms                                                        | <b>2d</b> | 96                     | 16.86                                  |
| 5     | <i>p</i> -ClC <sub>6</sub> H <sub>4</sub> SO <sub>2</sub> | <b>2e</b> | 91                     | 16.5                                   |
| 6     | Ns                                                        | <b>2f</b> | 72                     | 15.79                                  |
| 7     | COOMe                                                     | <b>2g</b> | 56                     | 20.51                                  |
| 8     | Ac                                                        | <b>2h</b> | 41                     | 23.17                                  |
| 9     | PhCO                                                      | <b>2i</b> | 23                     | 22.21                                  |
| 10    | <i>p</i> -ClC <sub>6</sub> H <sub>4</sub> CO              | <b>2j</b> | 20                     | 21.07                                  |
| 11    | <sup>t</sup> BuCO                                         | <b>2k</b> | <5                     | 23.87                                  |
| 12    | CF <sub>3</sub> CO                                        | <b>2l</b> | <5                     | 13.91                                  |
| 13    | Me                                                        | <b>2m</b> | <5                     | 25.48                                  |
| 14    | Bn                                                        | <b>2n</b> | <5                     | 24.54                                  |

<sup>a</sup>Reaction conditions: **1** (0.1 mmol, 1.0 equiv), Pd(OAc)<sub>2</sub> (0.01 mmol 10 mol%), **O1** (0.16 mmol, 1.6 equiv) and solvent (1 mL), irradiation with blue LEDs for 6 h at room temperature. PG = protecting group, Ts = *p*-MeC<sub>6</sub>H<sub>4</sub>SO<sub>2</sub>, Ns = *p*-NO<sub>2</sub>C<sub>6</sub>H<sub>4</sub>SO<sub>2</sub>, Ms = MeSO<sub>2</sub>. <sup>b</sup>Isolated yield.

<sup>c</sup>Predicted pK<sub>a</sub> in MeCN.

## 6.2 General procedure for carbazoles synthesis

A dry Schlenk tube equipped with a magnetic stirrer bar was charged with substrate **1** (0.10 mmol, 1.0 equiv) and Pd(OAc)<sub>2</sub> (0.01 mmol, 10 mol%) in MeCN (1 mL). **O1** (0.16 mmol, 1.6 equiv) was added, and the reaction mixture was stirred at room temperature under irradiation with blue LEDs (20 W) for 6-12 h. The reaction mixture was then purified by flash chromatography on silica gel (PE/EA).

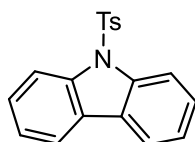

**9-Tosyl-9H-carbazole (2a)**: white solid; Yield 98%, 6h; **<sup>1</sup>H NMR (600 MHz, CDCl<sub>3</sub>)** δ 8.37 (d, *J* = 8.4 Hz, 2H; H<sub>Ar</sub>), 7.89 (d, *J* = 7.7 Hz, 2H; H<sub>Ar</sub>), 7.71 (d, *J* = 8.4 Hz, 2H; H<sub>Ar</sub>), 7.50 (t, *J* = 7.8 Hz, 2H; H<sub>Ar</sub>), 7.36 (t, *J* = 7.5 Hz, 2H; H<sub>Ar</sub>), 7.05 (d, *J* = 8.3 Hz, 2H; H<sub>Ar</sub>), 2.21 (s, 3H; CH<sub>3</sub>); **<sup>13</sup>C NMR (150 MHz, CDCl<sub>3</sub>)** δ 144.95 (C<sub>Ar</sub>), 138.43 (C<sub>Ar</sub>), 134.98 (C<sub>Ar</sub>), 129.71 (C<sub>Ar</sub>), 127.46 (C<sub>Ar</sub>), 126.52 (C<sub>Ar</sub>), 126.44 (C<sub>Ar</sub>), 123.98 (C<sub>Ar</sub>), 120.09 (C<sub>Ar</sub>), 115.21 (C<sub>Ar</sub>), 21.52 (CH<sub>3</sub>).

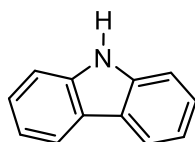

**9H-carbazole (2b)**: white solid; Yield 80%, 6h; **<sup>1</sup>H NMR (400 MHz, CDCl<sub>3</sub>)** δ 8.09 (d, *J* = 7.8 Hz, 2H; H<sub>Ar</sub>), 8.04 (s, 1H; NH), 7.46 – 7.39 (m, 4H; H<sub>Ar</sub>), 7.27 – 7.22 (m, 2H; H<sub>Ar</sub>); **<sup>13</sup>C NMR (101 MHz, CDCl<sub>3</sub>)** δ 139.62 (C<sub>Ar</sub>), 125.98 (C<sub>Ar</sub>), 123.50 (C<sub>Ar</sub>), 120.47 (C<sub>Ar</sub>), 119.59 (C<sub>Ar</sub>), 110.71 (C<sub>Ar</sub>).

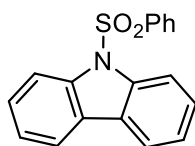

**9-(Phenylsulfonyl)-9H-carbazole (2c)**: white solid; Yield 94%, 6h; **<sup>1</sup>H NMR (400 MHz, CDCl<sub>3</sub>)** δ 8.35 (d, *J* = 8.4 Hz, 2H; H<sub>Ar</sub>), 7.90 (d, *J* = 7.6 Hz, 2H; H<sub>Ar</sub>), 7.83 (d, *J* = 8.0 Hz, 2H; H<sub>Ar</sub>), 7.50 (t, *J* = 7.6 Hz, 2H; H<sub>Ar</sub>), 7.43 (t, *J* = 7.6 Hz, 1H; H<sub>Ar</sub>), 7.37 (t, *J* = 7.6 Hz, 2H; H<sub>Ar</sub>), 7.30 (t, *J* = 7.6 Hz, 2H; H<sub>Ar</sub>); **<sup>13</sup>C NMR (101 MHz, CDCl<sub>3</sub>)** δ 138.46 (C<sub>Ar</sub>), 137.99 (C<sub>Ar</sub>), 133.88 (C<sub>Ar</sub>), 129.13 (C<sub>Ar</sub>), 127.54 (C<sub>Ar</sub>), 126.53 (C<sub>Ar</sub>), 126.52 (C<sub>Ar</sub>), 124.11 (C<sub>Ar</sub>), 120.15 (C<sub>Ar</sub>), 115.24 (C<sub>Ar</sub>).

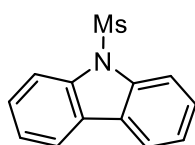

**9-(Methylsulfonyl)-9H-carbazole (2d)**: white solid; Yield 96%, 6h; **<sup>1</sup>H NMR (400 MHz, CDCl<sub>3</sub>)** δ 8.17 (d, *J* = 8.4 Hz, 2H; H<sub>Ar</sub>), 8.01 (d, *J* = 7.6 Hz, 2H; H<sub>Ar</sub>), 7.51 (t, *J* = 7.6 Hz, 2H; H<sub>Ar</sub>), 7.43 (t, *J* = 7.6 Hz, 2H; H<sub>Ar</sub>), 2.98 (s, 3H; CH<sub>3</sub>); **<sup>13</sup>C NMR (101 MHz, CDCl<sub>3</sub>)** δ 138.45 (C<sub>Ar</sub>), 127.70 (C<sub>Ar</sub>), 126.34 (C<sub>Ar</sub>), 124.23 (C<sub>Ar</sub>), 120.31 (C<sub>Ar</sub>), 114.77 (C<sub>Ar</sub>), 38.75 (CH<sub>3</sub>).

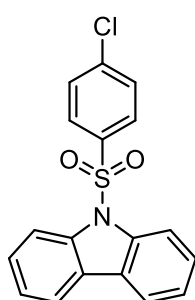

**9-((4-chlorophenyl)sulfonyl)-9H-carbazole (2e)**: white solid; Yield 91%, 6h; **<sup>1</sup>H NMR (400 MHz, CDCl<sub>3</sub>)** δ 8.30 (dd, *J* = 8.3, 4.3 Hz, 2H; H<sub>Ar</sub>), 7.91 (dd, *J* = 7.9, 3.8 Hz, 2H; H<sub>Ar</sub>), 7.76 – 7.68 (m, 2H; H<sub>Ar</sub>), 7.49 (td, *J* = 7.9, 3.7 Hz, 2H; H<sub>Ar</sub>), 7.38 (td, *J* = 7.6, 4.1 Hz, 2H; H<sub>Ar</sub>), 7.27 (dd, *J* = 9.0, 4.3 Hz, 2H; H<sub>Ar</sub>); **<sup>13</sup>C NMR (101 MHz, CDCl<sub>3</sub>)** δ 140.64 (C<sub>Ar</sub>), 138.34 (C<sub>Ar</sub>), 136.23 (C<sub>Ar</sub>), 129.53 (C<sub>Ar</sub>), 127.98 (C<sub>Ar</sub>), 127.71 (C<sub>Ar</sub>), 126.74 (C<sub>Ar</sub>), 124.44 (C<sub>Ar</sub>), 120.31 (C<sub>Ar</sub>), 115.32 (C<sub>Ar</sub>).

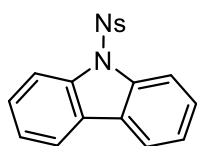

**4-(9H-carbazol-9-yl)-3-nitrobenzenesulfonic acid (2f):** yellow solid; Yield 72%, 6h;  $^1\text{H NMR}$  (400 MHz,  $\text{CDCl}_3$ )  $\delta$  8.31 (d,  $J = 8.4$  Hz, 2H;  $\text{H}_{\text{Ar}}$ ), 8.11 (d,  $J = 8.9$  Hz, 2H;  $\text{H}_{\text{Ar}}$ ), 7.98 – 7.92 (m, 2H;  $\text{H}_{\text{Ar}}$ ), 7.89 (d,  $J = 7.7$  Hz, 2H;  $\text{H}_{\text{Ar}}$ ), 7.55 – 7.48 (m, 2H;  $\text{H}_{\text{Ar}}$ ), 7.40 (t,  $J = 7.5$  Hz, 2H;  $\text{H}_{\text{Ar}}$ );  $^{13}\text{C NMR}$  (101 MHz,  $\text{CDCl}_3$ )  $\delta$  150.73 ( $\text{C}_{\text{Ar}}$ ), 142.83 ( $\text{C}_{\text{Ar}}$ ), 138.07 ( $\text{C}_{\text{Ar}}$ ), 127.93 ( $\text{C}_{\text{Ar}}$ ), 127.82 ( $\text{C}_{\text{Ar}}$ ), 126.90 ( $\text{C}_{\text{Ar}}$ ), 124.93 ( $\text{C}_{\text{Ar}}$ ), 124.36 ( $\text{C}_{\text{Ar}}$ ), 120.46 ( $\text{C}_{\text{Ar}}$ ), 115.33 ( $\text{C}_{\text{Ar}}$ ); **HRMS (ESI)**  $m/z$  calcd for  $\text{C}_{18}\text{H}_{13}\text{N}_2\text{O}_4\text{S}^+$  ( $\text{M}+\text{H}$ ) $^+$  353.0591, found 353.0595.

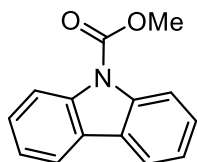

**Methyl 9H-carbazole-9-carboxylate (g):** white solid; Yield 56%, 6h;  $^1\text{H NMR}$  (400 MHz,  $\text{CDCl}_3$ )  $\delta$  8.31 (d,  $J = 8.3$  Hz, 2H;  $\text{H}_{\text{Ar}}$ ), 7.99 (d,  $J = 7.6$  Hz, 2H;  $\text{H}_{\text{Ar}}$ ), 7.49 (dd,  $J = 11.5, 4.2$  Hz, 2H;  $\text{H}_{\text{Ar}}$ ), 7.38 (t,  $J = 7.5$  Hz, 2H;  $\text{H}_{\text{Ar}}$ ), 4.15 (s, 3H;  $\text{CH}_3$ );  $^{13}\text{C NMR}$  (101 MHz,  $\text{CDCl}_3$ )  $\delta$  153.12 (CO), 138.36 ( $\text{C}_{\text{Ar}}$ ), 127.37 ( $\text{C}_{\text{Ar}}$ ), 126.09 ( $\text{C}_{\text{Ar}}$ ), 123.52 ( $\text{C}_{\text{Ar}}$ ), 119.81 ( $\text{C}_{\text{Ar}}$ ), 116.39 ( $\text{C}_{\text{Ar}}$ ), 53.71 ( $\text{CH}_3$ ); **HRMS (ESI)**  $m/z$  calcd for  $\text{C}_{14}\text{H}_{12}\text{NO}_2^+$  ( $\text{M}+\text{H}$ ) $^+$  226.0863, found 226.0868.

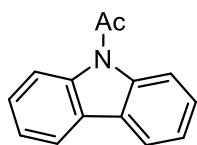

**1-(9H-carbazol-9-yl)ethan-1-one (2h):** white solid; Yield 41%, 6h;  $^1\text{H NMR}$  (400 MHz,  $\text{CDCl}_3$ )  $\delta$  8.23 (d,  $J = 8.4$  Hz, 2H;  $\text{H}_{\text{Ar}}$ ), 8.01 (d,  $J = 7.6$  Hz, 2H;  $\text{H}_{\text{Ar}}$ ), 7.49 (t,  $J = 7.6$  Hz, 2H;  $\text{H}_{\text{Ar}}$ ), 7.40 (t,  $J = 7.6$  Hz, 2H;  $\text{H}_{\text{Ar}}$ ), 2.90 (s, 3H;  $\text{CH}_3$ );  $^{13}\text{C NMR}$  (101 MHz,  $\text{CDCl}_3$ )  $\delta$  170.23 ( $\text{C}_{\text{Ar}}$ ), 138.84 ( $\text{C}_{\text{Ar}}$ ), 127.52 ( $\text{C}_{\text{Ar}}$ ), 126.61 ( $\text{C}_{\text{Ar}}$ ), 123.85 ( $\text{C}_{\text{Ar}}$ ), 110.01 ( $\text{C}_{\text{Ar}}$ ), 116.43 ( $\text{C}_{\text{Ar}}$ ), 27.89 ( $\text{CH}_3$ ).

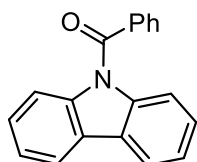

**(9H-carbazol-9-yl)(phenyl)methanone (2i):** white solid; Yield 23%, 6h;  $^1\text{H NMR}$  (400 MHz,  $\text{CDCl}_3$ )  $\delta$  8.02 (dd,  $J = 6.8, 2.3$  Hz, 2H;  $\text{H}_{\text{Ar}}$ ), 7.75 – 7.70 (m, 2H;  $\text{H}_{\text{Ar}}$ ), 7.69 – 7.63 (m, 1H;  $\text{H}_{\text{Ar}}$ ), 7.57 – 7.49 (m, 4H;  $\text{H}_{\text{Ar}}$ ), 7.34 (pd,  $J = 7.3, 1.7$  Hz, 4H;  $\text{H}_{\text{Ar}}$ );  $^{13}\text{C NMR}$  (101 MHz,  $\text{CDCl}_3$ )  $\delta$  169.81 (CO), 139.31 ( $\text{C}_{\text{Ar}}$ ), 135.91 ( $\text{C}_{\text{Ar}}$ ), 132.55 ( $\text{C}_{\text{Ar}}$ ), 129.22 ( $\text{C}_{\text{Ar}}$ ), 129.07 ( $\text{C}_{\text{Ar}}$ ), 126.90 ( $\text{C}_{\text{Ar}}$ ), 126.19 ( $\text{C}_{\text{Ar}}$ ), 123.57 ( $\text{C}_{\text{Ar}}$ ), 119.98 ( $\text{C}_{\text{Ar}}$ ), 115.96 ( $\text{C}_{\text{Ar}}$ ).

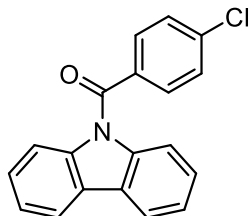

**(9H-carbazol-9-yl)(4-chlorophenyl)methanone (2j):** white solid; Yield 20%, 6h;  $^1\text{H NMR}$  (400 MHz,  $\text{CDCl}_3$ )  $\delta$  8.03 – 8.00 (m, 2H;  $\text{H}_{\text{Ar}}$ ), 7.71 – 7.66 (m, 2H;  $\text{H}_{\text{Ar}}$ ), 7.55 – 7.48 (m, 4H;  $\text{H}_{\text{Ar}}$ ), 7.40 – 7.32 (m, 4H;  $\text{H}_{\text{Ar}}$ );  $^{13}\text{C NMR}$  (101 MHz,  $\text{CDCl}_3$ )  $\delta$  168.56 ( $\text{C}_{\text{Ar}}$ ), 139.10 ( $\text{C}_{\text{Ar}}$ ), 138.94 ( $\text{C}_{\text{Ar}}$ ), 134.10 ( $\text{C}_{\text{Ar}}$ ), 130.79 ( $\text{C}_{\text{Ar}}$ ), 129.40 ( $\text{C}_{\text{Ar}}$ ), 126.97 ( $\text{C}_{\text{Ar}}$ ), 126.19 ( $\text{C}_{\text{Ar}}$ ), 123.73 ( $\text{C}_{\text{Ar}}$ ), 120.07 ( $\text{C}_{\text{Ar}}$ ), 115.80 ( $\text{C}_{\text{Ar}}$ ).

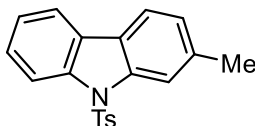

**2-Methyl-9-tosyl-9H-carbazole (2aa/2ba):** white solid; Yield 98% from **1aa**; Yield 93% from **1ba**, 6h;  $^1\text{H NMR}$  (400 MHz,  $\text{CDCl}_3$ )  $\delta$  8.31 (d,  $J = 8.4$  Hz, 1H;  $\text{H}_{\text{Ar}}$ ), 8.17 (s, 1H;  $\text{H}_{\text{Ar}}$ ), 7.84 (d,  $J = 7.7$  Hz, 1H;  $\text{H}_{\text{Ar}}$ ), 7.76 (d,  $J = 7.9$  Hz, 1H;  $\text{H}_{\text{Ar}}$ ), 7.70 (d,  $J = 8.4$  Hz, 2H;  $\text{H}_{\text{Ar}}$ ), 7.49 – 7.41 (m, 1H;  $\text{H}_{\text{Ar}}$ ), 7.37 – 7.30 (m, 1H;  $\text{H}_{\text{Ar}}$ ), 7.18 (d,  $J = 7.8$  Hz, 1H;  $\text{H}_{\text{Ar}}$ ), 7.08 (d,  $J = 8.2$  Hz, 2H;  $\text{H}_{\text{Ar}}$ ), 2.57 (s, 3H;  $\text{CH}_3$ ), 2.24 (s, 3H;  $\text{CH}_3$ );  $^{13}\text{C NMR}$  (150 MHz,  $\text{CDCl}_3$ )  $\delta$  144.88 ( $\text{C}_{\text{Ar}}$ ), 138.87 ( $\text{C}_{\text{Ar}}$ ), 138.41 ( $\text{C}_{\text{Ar}}$ ), 137.85 ( $\text{C}_{\text{Ar}}$ ), 135.14 ( $\text{C}_{\text{Ar}}$ ), 129.74 ( $\text{C}_{\text{Ar}}$ ), 126.91 ( $\text{C}_{\text{Ar}}$ ), 126.58 ( $\text{C}_{\text{Ar}}$ ), 126.53 ( $\text{C}_{\text{Ar}}$ ), 125.30 ( $\text{C}_{\text{Ar}}$ ), 124.08 ( $\text{C}_{\text{Ar}}$ ), 123.91 ( $\text{C}_{\text{Ar}}$ ), 119.76 ( $\text{C}_{\text{Ar}}$ ), 119.71 ( $\text{C}_{\text{Ar}}$ ), 115.42 ( $\text{C}_{\text{Ar}}$ ), 115.20 ( $\text{C}_{\text{Ar}}$ ), 22.40 ( $\text{CH}_3$ ), 21.57 ( $\text{CH}_3$ ); **HRMS (ESI)**  $m/z$  calcd for  $\text{C}_{20}\text{H}_{18}\text{NO}_2\text{S}^+$  ( $\text{M}+\text{H}$ ) $^+$  336.1053, found 336.1055.

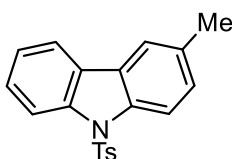

**2-Methyl-9-tosyl-9H-carbazole (2ab/2bb):** white solid; Yield 97% from **1ab**; Yield 97% from **1bb**, 6h;  $^1\text{H NMR}$  (400 MHz,  $\text{CDCl}_3$ )  $\delta$  8.31 (d,  $J = 8.4$  Hz, 1H;  $\text{H}_{\text{Ar}}$ ), 8.17 (s, 1H;  $\text{H}_{\text{Ar}}$ ), 7.84 (d,  $J = 7.6$  Hz, 1H;  $\text{H}_{\text{Ar}}$ ), 7.76 (d,  $J = 8.0$  Hz, 1H;  $\text{H}_{\text{Ar}}$ ), 7.70 (d,  $J = 8.4$  Hz, 2H;  $\text{H}_{\text{Ar}}$ ), 7.49 – 7.41 (m, 1H;  $\text{H}_{\text{Ar}}$ ), 7.37 – 7.30 (m, 1H;  $\text{H}_{\text{Ar}}$ ), 7.18 (d,  $J = 7.6$  Hz, 1H;  $\text{H}_{\text{Ar}}$ ), 7.08 (d,  $J = 8.0$  Hz, 2H;  $\text{H}_{\text{Ar}}$ ), 2.57 (s, 3H;  $\text{CH}_3$ ), 2.24 (s, 3H;  $\text{CH}_3$ );  $^{13}\text{C NMR}$  (150 MHz,  $\text{CDCl}_3$ )  $\delta$  144.85 ( $\text{C}_{\text{Ar}}$ ), 138.75 ( $\text{C}_{\text{Ar}}$ ), 136.61 ( $\text{C}_{\text{Ar}}$ ), 135.02 ( $\text{C}_{\text{Ar}}$ ), 133.74 ( $\text{C}_{\text{Ar}}$ ), 129.89 ( $\text{C}_{\text{Ar}}$ ), 129.71 ( $\text{C}_{\text{Ar}}$ ), 128.70 ( $\text{C}_{\text{Ar}}$ ), 127.32 ( $\text{C}_{\text{Ar}}$ ), 126.66 ( $\text{C}_{\text{Ar}}$ ), 126.57 ( $\text{C}_{\text{Ar}}$ ), 123.93 ( $\text{C}_{\text{Ar}}$ ), 120.19 ( $\text{C}_{\text{Ar}}$ ), 110.00 ( $\text{C}_{\text{Ar}}$ ), 115.33 ( $\text{C}_{\text{Ar}}$ ), 115.00 ( $\text{C}_{\text{Ar}}$ ), 21.60 ( $\text{CH}_3$ ), 21.41 ( $\text{CH}_3$ ); **HRMS (ESI)**  $m/z$  calcd for  $\text{C}_{20}\text{H}_{18}\text{NO}_2\text{S}^+$  ( $\text{M}+\text{H}$ ) $^+$  336.1053, found 336.1055.

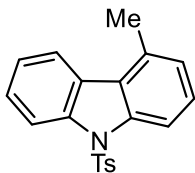

**4-Methyl-9-tosyl-9H-carbazole (2ac/2bc):** white solid; Yield 64% from **1ac**; Yield 39% from **1bc**, 6h;  $^1\text{H NMR}$  (600 MHz,  $\text{CDCl}_3$ )  $\delta$  8.41 (d,  $J = 8.4$  Hz, 1H;  $\text{H}_{\text{Ar}}$ ), 8.24 (d,  $J = 8.4$  Hz, 1H;  $\text{H}_{\text{Ar}}$ ), 8.03 (d,  $J = 7.8$  Hz, 1H;  $\text{H}_{\text{Ar}}$ ), 7.69 (d,  $J = 8.3$  Hz, 2H;  $\text{H}_{\text{Ar}}$ ), 7.50 (t,  $J = 7.8$  Hz, 1H;  $\text{H}_{\text{Ar}}$ ), 7.38 (td,  $J = 7.8, 3.7$  Hz, 2H;  $\text{H}_{\text{Ar}}$ ), 7.14 (d,  $J = 7.4$  Hz, 1H;  $\text{H}_{\text{Ar}}$ ), 7.08 (d,  $J = 8.3$  Hz, 2H;  $\text{H}_{\text{Ar}}$ ), 2.76 (s, 3H;  $\text{CH}_3$ ), 2.25 (s, 3H;  $\text{CH}_3$ );  $^{13}\text{C NMR}$  (150 MHz,  $\text{CDCl}_3$ )  $\delta$  144.88 ( $\text{C}_{\text{Ar}}$ ), 138.66 ( $\text{C}_{\text{Ar}}$ ), 138.55 ( $\text{C}_{\text{Ar}}$ ), 135.21 ( $\text{C}_{\text{Ar}}$ ), 133.30 ( $\text{C}_{\text{Ar}}$ ), 129.72 ( $\text{C}_{\text{Ar}}$ ), 127.28 ( $\text{C}_{\text{Ar}}$ ), 127.06 ( $\text{C}_{\text{Ar}}$ ), 126.76 ( $\text{C}_{\text{Ar}}$ ), 126.61 ( $\text{C}_{\text{Ar}}$ ), 125.85 ( $\text{C}_{\text{Ar}}$ ), 124.82 ( $\text{C}_{\text{Ar}}$ ), 123.91 ( $\text{C}_{\text{Ar}}$ ), 122.67 ( $\text{C}_{\text{Ar}}$ ), 115.09 ( $\text{C}_{\text{Ar}}$ ), 112.78 ( $\text{C}_{\text{Ar}}$ ), 21.57 ( $\text{CH}_3$ ), 21.02 ( $\text{CH}_3$ ); **HRMS (ESI)**  $m/z$  calcd for  $\text{C}_{20}\text{H}_{18}\text{NO}_2\text{S}^+$  ( $\text{M}+\text{H}$ ) $^+$  336.1053, found 336.1056.

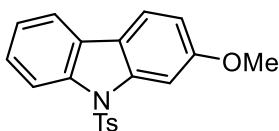

**2-Methoxy-9-tosyl-9H-carbazole (2ad):** yellow solid; Yield 87%, 6h;  $^1\text{H NMR}$  (400 MHz,  $\text{CDCl}_3$ )  $\delta$  8.28 (d,  $J = 8.3$  Hz, 1H;  $\text{H}_{\text{Ar}}$ ), 7.90 (d,  $J = 2.2$  Hz, 1H;  $\text{H}_{\text{Ar}}$ ), 7.79-7.76 (m, 1H;  $\text{H}_{\text{Ar}}$ ), 7.75 (d,  $J = 8.5$  Hz, 1H;  $\text{H}_{\text{Ar}}$ ), 7.69 (d,  $J = 8.4$  Hz, 2H;  $\text{H}_{\text{Ar}}$ ), 7.40 (td,  $J = 8.4, 7.9, 1.3$  Hz, 1H;  $\text{H}_{\text{Ar}}$ ), 7.31 (td,  $J = 7.6, 0.9$  Hz, 1H;  $\text{H}_{\text{Ar}}$ ), 7.09 (d,  $J = 8.1$  Hz, 2H;  $\text{H}_{\text{Ar}}$ ), 6.95 (dd,  $J = 8.5, 2.3$  Hz, 1H;  $\text{H}_{\text{Ar}}$ ), 3.95 (s, 3H;  $\text{CH}_3$ ), 2.25 (s, 3H;  $\text{CH}_3$ );  $^{13}\text{C NMR}$  (101 MHz,  $\text{CDCl}_3$ )  $\delta$  159.92 ( $\text{C}_{\text{Ar}}$ ), 144.99 ( $\text{C}_{\text{Ar}}$ ), 139.86 ( $\text{C}_{\text{Ar}}$ ), 138.48 ( $\text{C}_{\text{Ar}}$ ), 135.10 ( $\text{C}_{\text{Ar}}$ ), 129.77 ( $\text{C}_{\text{Ar}}$ ), 126.62 ( $\text{C}_{\text{Ar}}$ ), 126.58 ( $\text{C}_{\text{Ar}}$ ), 126.14 ( $\text{C}_{\text{Ar}}$ ), 124.06 ( $\text{C}_{\text{Ar}}$ ), 120.68 ( $\text{C}_{\text{Ar}}$ ), 119.93 ( $\text{C}_{\text{Ar}}$ ), 119.26 ( $\text{C}_{\text{Ar}}$ ), 115.17 ( $\text{C}_{\text{Ar}}$ ), 112.21 ( $\text{C}_{\text{Ar}}$ ), 100.03 ( $\text{C}_{\text{Ar}}$ ), 55.94 ( $\text{CH}_3$ ), 21.59 ( $\text{CH}_3$ ); **HRMS (ESI)**  $m/z$  calcd for  $\text{C}_{20}\text{H}_{18}\text{NO}_3\text{S}^+$  ( $\text{M}+\text{H}$ ) $^+$  352.1002, found 352.1001.

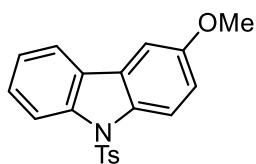

**3-Methoxy-9-tosyl-9H-carbazole (2ae):** red solid; Yield 92%, 6h;  $^1\text{H}$  NMR (400 MHz,  $\text{CDCl}_3$ )  $\delta$  8.31 (d,  $J = 8.4$  Hz, 1H;  $\text{H}_{\text{Ar}}$ ), 8.23 (d,  $J = 9.2$  Hz, 1H;  $\text{H}_{\text{Ar}}$ ), 7.84 (d,  $J = 7.7$  Hz, 1H;  $\text{H}_{\text{Ar}}$ ), 7.64 (d,  $J = 8.4$  Hz, 2H;  $\text{H}_{\text{Ar}}$ ), 7.51 – 7.44 (m, 1H;  $\text{H}_{\text{Ar}}$ ), 7.38 – 7.30 (m, 2H;  $\text{H}_{\text{Ar}}$ ), 7.11 – 7.03 (m, 3H;  $\text{H}_{\text{Ar}}$ ), 3.89 (s, 3H;  $\text{CH}_3$ ), 2.24 (s, 3H;  $\text{CH}_3$ );  $^{13}\text{C}$  NMR (150 MHz,  $\text{CDCl}_3$ )  $\delta$  156.95 ( $\text{C}_{\text{Ar}}$ ), 144.85 ( $\text{C}_{\text{Ar}}$ ), 139.18 ( $\text{C}_{\text{Ar}}$ ), 134.82 ( $\text{C}_{\text{Ar}}$ ), 132.82 ( $\text{C}_{\text{Ar}}$ ), 129.70 ( $\text{C}_{\text{Ar}}$ ), 127.66 ( $\text{C}_{\text{Ar}}$ ), 127.55 ( $\text{C}_{\text{Ar}}$ ), 126.70 ( $\text{C}_{\text{Ar}}$ ), 126.58 ( $\text{C}_{\text{Ar}}$ ), 123.94 ( $\text{C}_{\text{Ar}}$ ), 120.06 ( $\text{C}_{\text{Ar}}$ ), 116.39 ( $\text{C}_{\text{Ar}}$ ), 115.60 ( $\text{C}_{\text{Ar}}$ ), 115.42 ( $\text{C}_{\text{Ar}}$ ), 103.31 ( $\text{C}_{\text{Ar}}$ ), 55.88 ( $\text{CH}_3$ ), 21.62 ( $\text{CH}_3$ ); HRMS (ESI)  $m/z$  calcd for  $\text{C}_{20}\text{H}_{18}\text{NO}_3\text{S}^+$  ( $\text{M}+\text{H}$ ) $^+$  352.1002, found 352.1001.

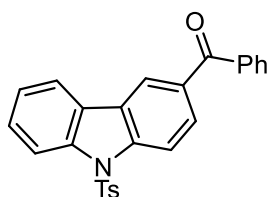

**phenyl(9-tosyl-9H-carbazol-3-yl)methanone (2af):** colorless liquid; Yield 90%, 6h;  $^1\text{H}$  NMR (400 MHz,  $\text{CDCl}_3$ ):  $\delta$  8.43 (d,  $J = 8.8$  Hz, 1H;  $\text{H}_{\text{Ar}}$ ), 8.40 (d,  $J = 2.0$  Hz, 1H;  $\text{H}_{\text{Ar}}$ ), 8.35 (d,  $J = 8.4$  Hz, 1H;  $\text{H}_{\text{Ar}}$ ), 7.98 (dd,  $J = 8.8, 1.8$  Hz, 1H;  $\text{H}_{\text{Ar}}$ ), 7.96 – 7.90 (m, 1H;  $\text{H}_{\text{Ar}}$ ), 7.87 – 7.80 (m, 2H;  $\text{H}_{\text{Ar}}$ ), 7.78 – 7.71 (m, 2H;  $\text{H}_{\text{Ar}}$ ), 7.66 – 7.58 (m, 1H;  $\text{H}_{\text{Ar}}$ ), 7.58 – 7.47 (m, 3H;  $\text{H}_{\text{Ar}}$ ), 7.38 (td,  $J = 7.7, 0.9$  Hz, 1H;  $\text{H}_{\text{Ar}}$ ), 7.14 (d,  $J = 8.3$  Hz, 2H;  $\text{H}_{\text{Ar}}$ ), 2.27 (s, 3H;  $\text{CH}_3$ );  $^{13}\text{C}$  NMR (101 MHz,  $\text{CDCl}_3$ ):  $\delta$  196.27 ( $\text{C}_{\text{Ar}}$ ), 145.47 ( $\text{C}_{\text{Ar}}$ ), 140.91 ( $\text{C}_{\text{Ar}}$ ), 138.97 ( $\text{C}_{\text{Ar}}$ ), 137.93 ( $\text{C}_{\text{Ar}}$ ), 134.86 ( $\text{C}_{\text{Ar}}$ ), 133.34 ( $\text{C}_{\text{Ar}}$ ), 132.51 ( $\text{C}_{\text{Ar}}$ ), 130.12 ( $\text{C}_{\text{Ar}}$ ), 129.96 ( $\text{C}_{\text{Ar}}$ ), 129.64 ( $\text{C}_{\text{Ar}}$ ), 128.47 ( $\text{C}_{\text{Ar}}$ ), 128.22 ( $\text{C}_{\text{Ar}}$ ), 126.61 ( $\text{C}_{\text{Ar}}$ ), 126.28 ( $\text{C}_{\text{Ar}}$ ), 125.83 ( $\text{C}_{\text{Ar}}$ ), 124.36 ( $\text{C}_{\text{Ar}}$ ), 122.58 ( $\text{C}_{\text{Ar}}$ ), 120.50 ( $\text{C}_{\text{Ar}}$ ), 115.17 ( $\text{C}_{\text{Ar}}$ ), 114.66 ( $\text{C}_{\text{Ar}}$ ), 21.62 ( $\text{CH}_3$ ); HRMS (ESI)  $m/z$  calcd for  $\text{C}_{26}\text{H}_{20}\text{NO}_3\text{S}^+$  ( $\text{M}+\text{H}$ ) $^+$  426.1158, found 426.1159.

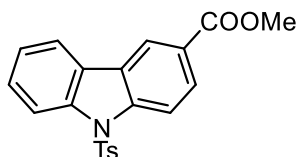

**methyl 9-tosyl-9H-carbazole-3-carboxylate (2ag):** white solid; Yield 84%, 6h;  $^1\text{H}$  NMR (400 MHz,  $\text{CDCl}_3$ )  $\delta$  8.61 (d,  $J = 1.7$  Hz, 1H;  $\text{H}_{\text{Ar}}$ ), 8.35 (dd,  $J = 16.1, 8.7$  Hz, 2H;  $\text{H}_{\text{Ar}}$ ), 8.18 (dt,  $J = 8.7, 1.5$  Hz, 1H;  $\text{H}_{\text{Ar}}$ ), 7.97 (d,  $J = 7.8$  Hz, 1H;  $\text{H}_{\text{Ar}}$ ), 7.71 (d,  $J = 8.4$  Hz, 2H;  $\text{H}_{\text{Ar}}$ ), 7.53 (ddd,  $J = 8.6, 7.3, 1.3$  Hz, 1H;  $\text{H}_{\text{Ar}}$ ), 7.40 (t,  $J = 7.6$  Hz, 1H;  $\text{H}_{\text{Ar}}$ ), 7.12 (d,  $J = 8.3$  Hz, 2H;  $\text{H}_{\text{Ar}}$ ), 3.97 (s, 3H;  $\text{CH}_3$ ), 2.28 (s, 3H;  $\text{CH}_3$ );  $^{13}\text{C}$  NMR (150 MHz,  $\text{CDCl}_3$ )  $\delta$  167.11 (CO), 145.46 ( $\text{C}_{\text{Ar}}$ ), 141.28 ( $\text{C}_{\text{Ar}}$ ), 138.96 ( $\text{C}_{\text{Ar}}$ ), 134.88 ( $\text{C}_{\text{Ar}}$ ), 129.97 ( $\text{C}_{\text{Ar}}$ ), 128.81 ( $\text{C}_{\text{Ar}}$ ), 128.19 ( $\text{C}_{\text{Ar}}$ ), 126.64 ( $\text{C}_{\text{Ar}}$ ), 126.45 ( $\text{C}_{\text{Ar}}$ ), 125.91 ( $\text{C}_{\text{Ar}}$ ), 124.43 ( $\text{C}_{\text{Ar}}$ ), 122.16 ( $\text{C}_{\text{Ar}}$ ), 120.49 ( $\text{C}_{\text{Ar}}$ ), 115.25 ( $\text{C}_{\text{Ar}}$ ), 114.81 ( $\text{C}_{\text{Ar}}$ ), 52.43 ( $\text{CH}_3$ ), 21.69 ( $\text{CH}_3$ ); HRMS (ESI)  $m/z$  calcd for  $\text{C}_{21}\text{H}_{18}\text{NO}_4\text{S}^+$  ( $\text{M}+\text{H}$ ) $^+$  380.0951, found 380.0951.

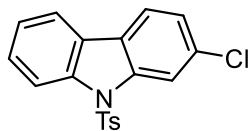

**2-Chloro-9-tosyl-9H-carbazole (2ah):** white solid; Yield 93%, 6h;  $^1\text{H}$  NMR (400 MHz,  $\text{CDCl}_3$ )  $\delta$  8.37 (d,  $J = 1.6$  Hz, 1H;  $\text{H}_{\text{Ar}}$ ), 8.30 (d,  $J = 8.4$  Hz, 1H;  $\text{H}_{\text{Ar}}$ ), 7.85 (d,  $J = 7.6$  Hz, 1H;  $\text{H}_{\text{Ar}}$ ), 7.79 (d,  $J = 8.4$  Hz, 1H;  $\text{H}_{\text{Ar}}$ ), 7.71 (d,  $J = 8.4$  Hz, 2H;  $\text{H}_{\text{Ar}}$ ), 7.54 – 7.46 (m, 1H;  $\text{H}_{\text{Ar}}$ ), 7.40 – 7.30 (m, 2H;  $\text{H}_{\text{Ar}}$ ), 7.12 (d,  $J = 8.0$  Hz, 2H;  $\text{H}_{\text{Ar}}$ ), 2.27 (s, 3H;  $\text{CH}_3$ );  $^{13}\text{C}$  NMR (150 MHz,  $\text{CDCl}_3$ )  $\delta$  145.35 ( $\text{C}_{\text{Ar}}$ ), 138.93 ( $\text{C}_{\text{Ar}}$ ), 138.61 ( $\text{C}_{\text{Ar}}$ ), 134.82 ( $\text{C}_{\text{Ar}}$ ), 133.22 ( $\text{C}_{\text{Ar}}$ ), 129.94 ( $\text{C}_{\text{Ar}}$ ), 127.77 ( $\text{C}_{\text{Ar}}$ ), 126.63 ( $\text{C}_{\text{Ar}}$ ), 125.63 ( $\text{C}_{\text{Ar}}$ ), 124.98 ( $\text{C}_{\text{Ar}}$ ), 124.52 ( $\text{C}_{\text{Ar}}$ ), 124.26 ( $\text{C}_{\text{Ar}}$ ), 120.85 ( $\text{C}_{\text{Ar}}$ ), 120.10 ( $\text{C}_{\text{Ar}}$ ), 115.43 ( $\text{C}_{\text{Ar}}$ ), 115.21 ( $\text{C}_{\text{Ar}}$ ), 21.66 ( $\text{CH}_3$ ); HRMS (ESI)  $m/z$  calcd for  $\text{C}_{19}\text{H}_{15}\text{ClNO}_2\text{S}^+$  ( $\text{M}+\text{H}$ ) $^+$  356.0507, found 356.0505.

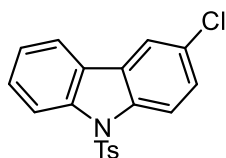

**3-Chloro-9-tosyl-9H-carbazole (2ai):** yellow solid; Yield 97%, 6h;  $^1\text{H}$  NMR (600 MHz,  $\text{CDCl}_3$ )  $\delta$  8.32 (d,  $J = 8.4$  Hz, 1H;  $\text{H}_{\text{Ar}}$ ), 8.26 (d,  $J = 8.9$  Hz, 1H;  $\text{H}_{\text{Ar}}$ ), 7.86 – 7.82 (m, 2H;  $\text{H}_{\text{Ar}}$ ), 7.67 (d,  $J = 8.4$  Hz, 2H;  $\text{H}_{\text{Ar}}$ ), 7.54 – 7.50 (m, 1H;  $\text{H}_{\text{Ar}}$ ), 7.44 (dd,  $J = 8.9, 2.1$  Hz, 1H;  $\text{H}_{\text{Ar}}$ ), 7.37 (dd,  $J = 11.2, 3.9$  Hz, 1H;  $\text{H}_{\text{Ar}}$ ), 7.10 (d,  $J = 8.3$  Hz, 2H;  $\text{H}_{\text{Ar}}$ ), 2.26 (s, 3H;  $\text{CH}_3$ );  $^{13}\text{C}$  NMR (150 MHz,  $\text{CDCl}_3$ )  $\delta$  145.27 ( $\text{C}_{\text{Ar}}$ ), 138.96 ( $\text{C}_{\text{Ar}}$ ), 136.81 ( $\text{C}_{\text{Ar}}$ ), 134.75 ( $\text{C}_{\text{Ar}}$ ), 129.86 ( $\text{C}_{\text{Ar}}$ ), 129.79 ( $\text{C}_{\text{Ar}}$ ), 128.24 ( $\text{C}_{\text{Ar}}$ ), 127.91 ( $\text{C}_{\text{Ar}}$ ), 127.50 ( $\text{C}_{\text{Ar}}$ ), 126.57 ( $\text{C}_{\text{Ar}}$ ), 125.43 ( $\text{C}_{\text{Ar}}$ ), 124.27 ( $\text{C}_{\text{Ar}}$ ), 120.31 ( $\text{C}_{\text{Ar}}$ ), 110.00 ( $\text{C}_{\text{Ar}}$ ), 116.36 ( $\text{C}_{\text{Ar}}$ ), 115.39 ( $\text{C}_{\text{Ar}}$ ), 21.63 ( $\text{CH}_3$ ); HRMS (ESI)  $m/z$  calcd for  $\text{C}_{19}\text{H}_{15}\text{ClNO}_2\text{S}^+$  ( $\text{M}+\text{H}$ ) $^+$  356.0507, found 356.0502.

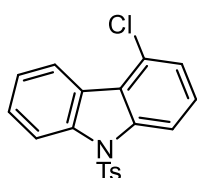

**4-Chloro-9-tosyl-9H-carbazole (2aj):** white solid; Yield 96%, 6h;  $^1\text{H}$  NMR (400 MHz,  $\text{CDCl}_3$ )  $\delta$  8.53 (d,  $J = 7.9$  Hz, 1H;  $\text{H}_{\text{Ar}}$ ), 8.39 (d,  $J = 8.4$  Hz, 1H;  $\text{H}_{\text{Ar}}$ ), 8.31 (d,  $J = 8.2$  Hz, 1H;  $\text{H}_{\text{Ar}}$ ), 7.69 (d,  $J = 8.4$  Hz, 2H;  $\text{H}_{\text{Ar}}$ ), 7.59 – 7.51 (m, 1H;  $\text{H}_{\text{Ar}}$ ), 7.40 (t,  $J = 8.0$  Hz, 2H;  $\text{H}_{\text{Ar}}$ ), 7.34 (d,  $J = 7.8$  Hz, 1H;  $\text{H}_{\text{Ar}}$ ), 7.10 (d,  $J = 8.2$  Hz, 2H;  $\text{H}_{\text{Ar}}$ ), 2.26 (s, 3H;  $\text{CH}_3$ );  $^{13}\text{C}$  NMR (101 MHz,  $\text{CDCl}_3$ )  $\delta$  145.31 ( $\text{C}_{\text{Ar}}$ ), 139.71 ( $\text{C}_{\text{Ar}}$ ), 138.63 ( $\text{C}_{\text{Ar}}$ ), 134.89 ( $\text{C}_{\text{Ar}}$ ), 129.87 ( $\text{C}_{\text{Ar}}$ ), 128.69 ( $\text{C}_{\text{Ar}}$ ), 127.99 ( $\text{C}_{\text{Ar}}$ ), 127.59 ( $\text{C}_{\text{Ar}}$ ), 126.63 ( $\text{C}_{\text{Ar}}$ ), 125.34 ( $\text{C}_{\text{Ar}}$ ), 125.13 ( $\text{C}_{\text{Ar}}$ ), 124.14 ( $\text{C}_{\text{Ar}}$ ), 123.72 ( $\text{C}_{\text{Ar}}$ ), 123.24 ( $\text{C}_{\text{Ar}}$ ), 114.91 ( $\text{C}_{\text{Ar}}$ ), 113.56 ( $\text{C}_{\text{Ar}}$ ), 21.62 ( $\text{CH}_3$ ); HRMS (ESI)  $m/z$  calcd for  $\text{C}_{19}\text{H}_{15}\text{ClNO}_2\text{S}^+$  ( $\text{M}+\text{H}$ ) $^+$  356.0507, found 356.0505.

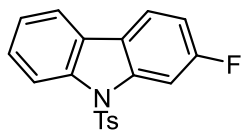

**2-Fluoro-9-tosyl-9H-carbazole (2ak):** white solid; Yield 94%, 6h;  $^1\text{H}$  NMR (400 MHz,  $\text{CDCl}_3$ )  $\delta$  8.31 (d,  $J = 8.3$  Hz, 1H;  $\text{H}_{\text{Ar}}$ ), 8.08 (dd,  $J = 10.2, 1.9$  Hz, 1H;  $\text{H}_{\text{Ar}}$ ), 7.82 (dd,  $J = 12.2, 6.6$  Hz, 2H;  $\text{H}_{\text{Ar}}$ ), 7.71 (d,  $J = 8.2$  Hz, 2H;  $\text{H}_{\text{Ar}}$ ), 7.47 (t,  $J = 7.8$  Hz, 1H;  $\text{H}_{\text{Ar}}$ ), 7.35 (t,  $J = 7.5$  Hz, 1H;  $\text{H}_{\text{Ar}}$ ), 7.09 (dd,  $J = 16.2, 5.1$  Hz, 3H;  $\text{H}_{\text{Ar}}$ ), 2.26 (s, 3H;  $\text{CH}_3$ );  $^{13}\text{C}$  NMR (101 MHz,  $\text{CDCl}_3$ )  $\delta$  162.47 (d,  $J = 244.0$  Hz) ( $\text{C}_{\text{Ar}}$ ), 145.30 ( $\text{C}_{\text{Ar}}$ ), 139.11 (d,  $J = 12.5$  Hz) ( $\text{C}_{\text{Ar}}$ ), 138.85 (d,  $J = 2.2$  Hz) ( $\text{C}_{\text{Ar}}$ ), 134.93 ( $\text{C}_{\text{Ar}}$ ), 129.89 ( $\text{C}_{\text{Ar}}$ ), 127.11 ( $\text{C}_{\text{Ar}}$ ), 126.63 ( $\text{C}_{\text{Ar}}$ ), 125.84 ( $\text{C}_{\text{Ar}}$ ), 124.23 ( $\text{C}_{\text{Ar}}$ ), 122.68 (d,  $J = 1.9$  Hz) ( $\text{C}_{\text{Ar}}$ ), 120.97 (d,  $J = 10.1$  Hz) ( $\text{C}_{\text{Ar}}$ ), 119.80 ( $\text{C}_{\text{Ar}}$ ), 115.16 ( $\text{C}_{\text{Ar}}$ ), 111.97 (d,  $J = 24.0$  Hz) ( $\text{C}_{\text{Ar}}$ ), 102.93 (d,  $J = 29.1$  Hz) ( $\text{C}_{\text{Ar}}$ ), 21.60 ( $\text{CH}_3$ );  $^{19}\text{F}$  NMR (376 MHz,  $\text{CDCl}_3$ )  $\delta$  -36.11 – -36.22 (m, 1F); HRMS (ESI)  $m/z$  calcd for  $\text{C}_{19}\text{H}_{15}\text{FNO}_2\text{S}^+$  ( $\text{M}+\text{H}$ ) $^+$  340.0802, found 340.0807.

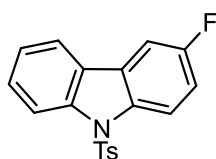

**3-Fluoro-9-tosyl-9H-carbazole (2al):** white solid; Yield 92%, 6h;  $^1\text{H}$  NMR (400 MHz,  $\text{CDCl}_3$ )  $\delta$  8.27 – 8.14 (m, 2H;  $\text{H}_{\text{Ar}}$ ), 7.73 (d,  $J = 7.6$  Hz, 1H;  $\text{H}_{\text{Ar}}$ ), 7.56 (d,  $J = 8.0$  Hz, 2H;  $\text{H}_{\text{Ar}}$ ), 7.42 (t,  $J = 7.9$  Hz, 2H;  $\text{H}_{\text{Ar}}$ ), 7.26 (t,  $J = 7.5$  Hz, 1H;  $\text{H}_{\text{Ar}}$ ), 7.11 (dd,  $J = 12.4, 5.3$  Hz, 1H;  $\text{H}_{\text{Ar}}$ ), 6.99 (d,  $J = 7.9$  Hz, 2H;  $\text{H}_{\text{Ar}}$ ), 2.15 (s, 3H;  $\text{CH}_3$ );  $^{13}\text{C}$  NMR (101 MHz,  $\text{CDCl}_3$ )  $\delta$  160.05 (d,  $J = 242.1$  Hz) ( $\text{C}_{\text{Ar}}$ ), 145.15 ( $\text{C}_{\text{Ar}}$ ), 139.37 ( $\text{C}_{\text{Ar}}$ ), 134.83 ( $\text{C}_{\text{Ar}}$ ), 134.65 (d,  $J = 1.8$  Hz) ( $\text{C}_{\text{Ar}}$ ), 129.81 ( $\text{C}_{\text{Ar}}$ ), 128.15 ( $\text{C}_{\text{Ar}}$ ), 127.89 (d,  $J = 9.5$  Hz) ( $\text{C}_{\text{Ar}}$ ), 126.58 ( $\text{C}_{\text{Ar}}$ ), 126.01 (d,  $J = 3.7$  Hz) ( $\text{C}_{\text{Ar}}$ ), 124.15 ( $\text{C}_{\text{Ar}}$ ), 110.35 ( $\text{C}_{\text{Ar}}$ ), 116.53 (d,  $J = 8.9$  Hz) ( $\text{C}_{\text{Ar}}$ ), 115.58 ( $\text{C}_{\text{Ar}}$ ), 114.94 (d,  $J = 24.7$  Hz) ( $\text{C}_{\text{Ar}}$ ), 106.28 (d,  $J = 24.2$  Hz) ( $\text{C}_{\text{Ar}}$ ), 21.60 ( $\text{CH}_3$ );  $^{19}\text{F}$  NMR (376 MHz,  $\text{CDCl}_3$ )  $\delta$  -42.55 (td,  $J = 8.6, 4.5$  Hz, 1F); HRMS (ESI)  $m/z$  calcd for  $\text{C}_{19}\text{H}_{15}\text{FNO}_2\text{S}^+$  ( $\text{M}+\text{H}$ ) $^+$  340.0802, found 340.0800.



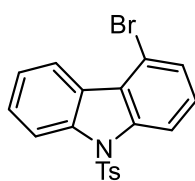

**4-bromo-9-tosyl-9H-carbazole (2am):** colorless liquid; Yield 90%, 6h;  $^1\text{H NMR}$  (400 MHz,  $\text{CDCl}_3$ ):  $\delta$  8.71 (d,  $J = 7.9$  Hz, 1H;  $\text{H}_{\text{Ar}}$ ), 8.39 (t,  $J = 8.6$  Hz, 2H;  $\text{H}_{\text{Ar}}$ ), 7.68 (d,  $J = 8.4$  Hz, 2H;  $\text{H}_{\text{Ar}}$ ), 7.60 – 7.49 (m, 2H;  $\text{H}_{\text{Ar}}$ ), 7.41 (t,  $J = 7.6$  Hz, 1H;  $\text{H}_{\text{Ar}}$ ), 7.33 (t,  $J = 8.1$  Hz, 1H;  $\text{H}_{\text{Ar}}$ ), 7.10 (d,  $J = 8.4$  Hz, 2H;  $\text{H}_{\text{Ar}}$ ), 2.25 (s, 3H;  $\text{CH}_3$ );  $^{13}\text{C NMR}$  (101 MHz,  $\text{CDCl}_3$ ):  $\delta$  145.35 ( $\text{C}_{\text{Ar}}$ ), 139.71 ( $\text{C}_{\text{Ar}}$ ), 138.69 ( $\text{C}_{\text{Ar}}$ ), 134.73 ( $\text{C}_{\text{Ar}}$ ), 129.87 ( $\text{C}_{\text{Ar}}$ ), 128.56 ( $\text{C}_{\text{Ar}}$ ), 128.14 ( $\text{C}_{\text{Ar}}$ ), 127.79 ( $\text{C}_{\text{Ar}}$ ), 126.60 ( $\text{C}_{\text{Ar}}$ ), 125.85 ( $\text{C}_{\text{Ar}}$ ), 124.99 ( $\text{C}_{\text{Ar}}$ ), 123.83 ( $\text{C}_{\text{Ar}}$ ), 122.82 ( $\text{C}_{\text{Ar}}$ ), 116.42 ( $\text{C}_{\text{Ar}}$ ), 114.89 ( $\text{C}_{\text{Ar}}$ ), 114.07 ( $\text{C}_{\text{Ar}}$ ), 21.63 ( $\text{CH}_3$ ); **HRMS (ESI)**  $m/z$  calcd for  $\text{C}_{19}\text{H}_{15}\text{BrNO}_2\text{S}^+$  ( $\text{M}+\text{H}$ ) $^+$  400.0001, found 400.0000.

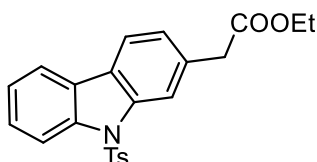

**Ethyl 2-(9-tosyl-9H-carbazol-2-yl)acetate (2an):** yellow solid; Yield 97%, 6h;  $^1\text{H NMR}$  (600 MHz,  $\text{CDCl}_3$ )  $\delta$  8.34 – 8.28 (m, 2H;  $\text{H}_{\text{Ar}}$ ), 7.86 (d,  $J = 7.7$  Hz, 1H;  $\text{H}_{\text{Ar}}$ ), 7.83 (d,  $J = 7.9$  Hz, 1H;  $\text{H}_{\text{Ar}}$ ), 7.71 (d,  $J = 8.4$  Hz, 2H;  $\text{H}_{\text{Ar}}$ ), 7.50 – 7.44 (m, 1H;  $\text{H}_{\text{Ar}}$ ), 7.34 (t,  $J = 7.5$  Hz, 1H;  $\text{H}_{\text{Ar}}$ ), 7.29 (dd,  $J = 7.9, 0.9$  Hz, 1H;  $\text{H}_{\text{Ar}}$ ), 7.08 (d,  $J = 8.4$  Hz, 2H;  $\text{H}_{\text{Ar}}$ ), 4.21 (q,  $J = 7.1$  Hz, 2H;  $\text{CH}_2$ ), 3.82 (s, 2H;  $\text{CH}_2$ ), 2.24 (s, 3H;  $\text{CH}_3$ ), 1.30 (t,  $J = 7.1$  Hz, 3H;  $\text{CH}_3$ );  $^{13}\text{C NMR}$  (150 MHz,  $\text{CDCl}_3$ )  $\delta$  171.57 (CO), 144.99 ( $\text{C}_{\text{Ar}}$ ), 138.68 ( $\text{C}_{\text{Ar}}$ ), 138.62 ( $\text{C}_{\text{Ar}}$ ), 134.91 ( $\text{C}_{\text{Ar}}$ ), 133.75 ( $\text{C}_{\text{Ar}}$ ), 129.74 ( $\text{C}_{\text{Ar}}$ ), 127.37 ( $\text{C}_{\text{Ar}}$ ), 126.61 ( $\text{C}_{\text{Ar}}$ ), 126.28 ( $\text{C}_{\text{Ar}}$ ), 125.50 ( $\text{C}_{\text{Ar}}$ ), 125.34 ( $\text{C}_{\text{Ar}}$ ), 124.03 ( $\text{C}_{\text{Ar}}$ ), 110.05 ( $\text{C}_{\text{Ar}}$ ), 110.02 ( $\text{C}_{\text{Ar}}$ ), 116.17 ( $\text{C}_{\text{Ar}}$ ), 115.25 ( $\text{C}_{\text{Ar}}$ ), 61.09 ( $\text{CH}_2$ ), 41.98 ( $\text{CH}_2$ ), 21.57 ( $\text{CH}_3$ ), 14.33 ( $\text{CH}_3$ ); **HRMS (ESI)**  $m/z$  calcd for  $\text{C}_{23}\text{H}_{22}\text{NO}_4\text{S}^+$  ( $\text{M}+\text{H}$ ) $^+$  408.1264, found 408.1267.

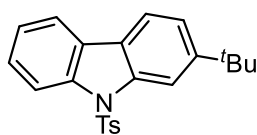

**2-(tert-butyl)-9-tosyl-9H-carbazole (2ao):** white solid; Yield 96%, 6h;  $^1\text{H NMR}$  (400 MHz,  $\text{CDCl}_3$ )  $\delta$  8.37 (dd,  $J = 12.0, 4.8$  Hz, 2H;  $\text{H}_{\text{Ar}}$ ), 7.85 (dd,  $J = 7.6, 0.4$  Hz, 1H;  $\text{H}_{\text{Ar}}$ ), 7.79 (d,  $J = 8.0$  Hz, 1H;  $\text{H}_{\text{Ar}}$ ), 7.68 (d,  $J = 8.4$  Hz, 2H;  $\text{H}_{\text{Ar}}$ ), 7.50 – 7.43 (m, 1H;  $\text{H}_{\text{Ar}}$ ), 7.41 (dd,  $J = 8.0, 1.6$  Hz, 1H;  $\text{H}_{\text{Ar}}$ ), 7.34 (td,  $J = 7.6, 0.8$  Hz, 1H;  $\text{H}_{\text{Ar}}$ ), 7.07 (d,  $J = 8.0$  Hz, 2H;  $\text{H}_{\text{Ar}}$ ), 2.24 (s, 3H;  $\text{CH}_3$ ), 1.46 (s, 9H;  $\text{CH}_3$ );  $^{13}\text{C NMR}$  (150 MHz,  $\text{CDCl}_3$ )  $\delta$  151.28 ( $\text{C}_{\text{Ar}}$ ), 144.88 ( $\text{C}_{\text{Ar}}$ ), 138.82 ( $\text{C}_{\text{Ar}}$ ), 138.74 ( $\text{C}_{\text{Ar}}$ ), 135.04 ( $\text{C}_{\text{Ar}}$ ), 129.67 ( $\text{C}_{\text{Ar}}$ ), 126.99 ( $\text{C}_{\text{Ar}}$ ), 126.59 ( $\text{C}_{\text{Ar}}$ ), 126.56 ( $\text{C}_{\text{Ar}}$ ), 124.12 ( $\text{C}_{\text{Ar}}$ ), 123.97 ( $\text{C}_{\text{Ar}}$ ), 121.60 ( $\text{C}_{\text{Ar}}$ ), 119.84 ( $\text{C}_{\text{Ar}}$ ), 119.46 ( $\text{C}_{\text{Ar}}$ ), 115.35 ( $\text{C}_{\text{Ar}}$ ), 112.15 ( $\text{C}_{\text{Ar}}$ ), 35.53 (C), 31.81 ( $\text{CH}_3$ ), 21.58 ( $\text{CH}_3$ ); **HRMS (ESI)**  $m/z$  calcd for  $\text{C}_{23}\text{H}_{24}\text{NO}_2\text{S}^+$  ( $\text{M}+\text{H}$ ) $^+$  378.1522, found 378.1521.

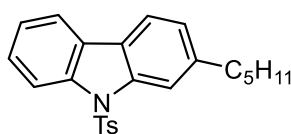

**2-pentyl-9-tosyl-9H-carbazole (2ap):** white solid; Yield 98%, 6h;  $^1\text{H NMR}$  (600 MHz,  $\text{CDCl}_3$ )  $\delta$  8.32 (d,  $J = 8.4$  Hz, 1H;  $\text{H}_{\text{Ar}}$ ), 8.16 (s, 1H;  $\text{H}_{\text{Ar}}$ ), 7.84 (d,  $J = 7.6$  Hz, 1H;  $\text{H}_{\text{Ar}}$ ), 7.78 (d,  $J = 7.9$  Hz, 1H;  $\text{H}_{\text{Ar}}$ ), 7.69 (d,  $J = 8.4$  Hz, 2H;  $\text{H}_{\text{Ar}}$ ), 7.45 (dd,  $J = 11.5, 4.1$  Hz, 1H;  $\text{H}_{\text{Ar}}$ ), 7.33 (t,  $J = 7.5$  Hz, 1H;  $\text{H}_{\text{Ar}}$ ), 7.18 (d,  $J = 7.4$  Hz, 1H;  $\text{H}_{\text{Ar}}$ ), 7.08 (d,  $J = 8.3$  Hz, 2H;  $\text{H}_{\text{Ar}}$ ), 2.81 (t,  $J = 7.7$  Hz, 2H;  $\text{CH}_2$ ), 2.25 (s, 3H;  $\text{CH}_3$ ), 1.77 – 1.68 (m, 2H;  $\text{CH}_2$ ), 1.43 – 1.32 (m, 4H;  $\text{CH}_2$ ), 0.93 (t,  $J = 7.0$  Hz, 3H;  $\text{CH}_3$ );  $^{13}\text{C NMR}$  (101 MHz,  $\text{CDCl}_3$ )  $\delta$  144.87 ( $\text{C}_{\text{Ar}}$ ), 143.04 ( $\text{C}_{\text{Ar}}$ ), 138.85 ( $\text{C}_{\text{Ar}}$ ), 138.57 ( $\text{C}_{\text{Ar}}$ ), 135.13 ( $\text{C}_{\text{Ar}}$ ), 129.69 ( $\text{C}_{\text{Ar}}$ ), 126.93 ( $\text{C}_{\text{Ar}}$ ), 126.70 ( $\text{C}_{\text{Ar}}$ ), 126.58 ( $\text{C}_{\text{Ar}}$ ), 124.77 ( $\text{C}_{\text{Ar}}$ ), 124.38 ( $\text{C}_{\text{Ar}}$ ), 123.97 ( $\text{C}_{\text{Ar}}$ ), 119.77 ( $\text{C}_{\text{Ar}}$ ), 119.74 ( $\text{C}_{\text{Ar}}$ ), 115.31 ( $\text{C}_{\text{Ar}}$ ), 115.01 ( $\text{C}_{\text{Ar}}$ ), 36.72 ( $\text{CH}_2$ ), 31.76 ( $\text{CH}_2$ ), 31.53 ( $\text{CH}_2$ ), 22.73 ( $\text{CH}_2$ ), 21.58 ( $\text{CH}_3$ ), 14.22 ( $\text{CH}_3$ ); **HRMS (ESI)**  $m/z$  calcd for  $\text{C}_{24}\text{H}_{26}\text{NO}_2\text{S}^+$  ( $\text{M}+\text{H}$ ) $^+$  392.1679, found 392.1679.

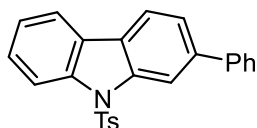

**2-Phenyl-9-tosyl-9H-carbazole (2aq):** yellow solid; Yield 98%, 6h;  $^1\text{H NMR}$  (400 MHz,  $\text{CDCl}_3$ )  $\delta$  8.60 (d,  $J = 1.1$  Hz, 1H;  $\text{H}_{\text{Ar}}$ ), 8.36 (d,  $J = 8.4$  Hz, 1H;  $\text{H}_{\text{Ar}}$ ), 7.92 (dd,  $J = 10.0, 8.1$  Hz, 2H;  $\text{H}_{\text{Ar}}$ ), 7.78 – 7.70 (m, 4H;  $\text{H}_{\text{Ar}}$ ), 7.61 (dd,  $J = 8.1, 1.4$  Hz, 1H;  $\text{H}_{\text{Ar}}$ ), 7.51 (dt,  $J = 8.3, 4.3$  Hz, 3H;  $\text{H}_{\text{Ar}}$ ), 7.40 (dt,  $J = 18.4, 7.3$  Hz, 2H;  $\text{H}_{\text{Ar}}$ ), 7.09 (d,  $J = 8.2$  Hz, 2H;  $\text{H}_{\text{Ar}}$ ), 2.25 (s, 3H;  $\text{CH}_3$ );  $^{13}\text{C NMR}$  (101 MHz,  $\text{CDCl}_3$ )  $\delta$  145.05 ( $\text{C}_{\text{Ar}}$ ), 141.26 ( $\text{C}_{\text{Ar}}$ ), 139.15 ( $\text{C}_{\text{Ar}}$ ), 138.90 ( $\text{C}_{\text{Ar}}$ ), 135.09 ( $\text{C}_{\text{Ar}}$ ), 129.82 ( $\text{C}_{\text{Ar}}$ ), 129.04 ( $\text{C}_{\text{Ar}}$ ), 127.67 ( $\text{C}_{\text{Ar}}$ ), 127.49 ( $\text{C}_{\text{Ar}}$ ), 126.62 ( $\text{C}_{\text{Ar}}$ ), 126.27 ( $\text{C}_{\text{Ar}}$ ), 125.63 ( $\text{C}_{\text{Ar}}$ ), 124.13 ( $\text{C}_{\text{Ar}}$ ), 123.47 ( $\text{C}_{\text{Ar}}$ ), 120.31 ( $\text{C}_{\text{Ar}}$ ), 120.14 ( $\text{C}_{\text{Ar}}$ ), 115.31 ( $\text{C}_{\text{Ar}}$ ), 113.72 ( $\text{C}_{\text{Ar}}$ ), 21.61 ( $\text{CH}_3$ ); **HRMS (ESI)**  $m/z$  calcd for  $\text{C}_{25}\text{H}_{20}\text{NO}_2\text{S}^+$  ( $\text{M}+\text{H}$ ) $^+$  398.1209, found 398.1206.

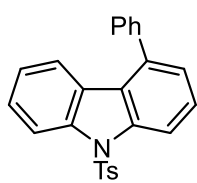

**4-phenyl-9-tosyl-9H-carbazole (2ar):** yellow solid; Yield 72%, 6h;  $^1\text{H NMR}$  (400 MHz,  $\text{CDCl}_3$ )  $\delta$  8.35 – 8.20 (m, 2H;  $\text{H}_{\text{Ar}}$ ), 7.71 – 7.56 (m, 2H;  $\text{H}_{\text{Ar}}$ ), 7.45 – 7.23 (m, 6H;  $\text{H}_{\text{Ar}}$ ), 7.13 (d,  $J = 6.3$  Hz, 1H;  $\text{H}_{\text{Ar}}$ ), 7.12 – 7.07 (m, 1H;  $\text{H}_{\text{Ar}}$ ), 7.02 (dt,  $J = 13.7, 6.7$  Hz, 3H;  $\text{H}_{\text{Ar}}$ ), 6.94 (dd,  $J = 13.9, 7.0$  Hz, 1H;  $\text{H}_{\text{Ar}}$ ), 2.16 (d,  $J = 5.9$  Hz, 3H;  $\text{CH}_3$ );  $^{13}\text{C NMR}$  (101 MHz,  $\text{CDCl}_3$ )  $\delta$  145.02 ( $\text{C}_{\text{Ar}}$ ), 130.36 ( $\text{C}_{\text{Ar}}$ ), 138.78 ( $\text{C}_{\text{Ar}}$ ), 138.71 ( $\text{C}_{\text{Ar}}$ ), 137.76 ( $\text{C}_{\text{Ar}}$ ), 135.27 ( $\text{C}_{\text{Ar}}$ ), 129.83 ( $\text{C}_{\text{Ar}}$ ), 129.18 ( $\text{C}_{\text{Ar}}$ ), 128.66 ( $\text{C}_{\text{Ar}}$ ), 127.99 ( $\text{C}_{\text{Ar}}$ ), 127.18 ( $\text{C}_{\text{Ar}}$ ), 126.96 ( $\text{C}_{\text{Ar}}$ ), 126.70 ( $\text{C}_{\text{Ar}}$ ), 126.19 ( $\text{C}_{\text{Ar}}$ ), 125.71 ( $\text{C}_{\text{Ar}}$ ), 123.82 ( $\text{C}_{\text{Ar}}$ ), 123.46 ( $\text{C}_{\text{Ar}}$ ), 122.44 ( $\text{C}_{\text{Ar}}$ ), 114.93 ( $\text{C}_{\text{Ar}}$ ), 112.8 ( $\text{C}_{\text{Ar}}$ ), 21.63 ( $\text{CH}_3$ ); **HRMS (ESI)**  $m/z$  calcd for  $\text{C}_{25}\text{H}_{20}\text{NO}_2\text{S}^+$  ( $\text{M}+\text{H}$ ) $^+$  398.1209, found 398.1205.

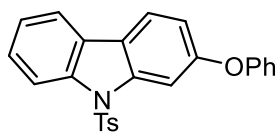

**2-Phenoxy-9-tosyl-9H-carbazole (2as):** yellow solid; Yield 93%, 6h;  $^1\text{H NMR}$  (400 MHz,  $\text{CDCl}_3$ )  $\delta$  8.34 (d,  $J = 8.4$  Hz, 1H;  $\text{H}_{\text{Ar}}$ ), 8.01 (d,  $J = 1.2$  Hz, 1H;  $\text{H}_{\text{Ar}}$ ), 7.88 – 7.79 (m, 2H;  $\text{H}_{\text{Ar}}$ ), 7.67 (d,  $J = 8.4$  Hz, 2H;  $\text{H}_{\text{Ar}}$ ), 7.47 (t,  $J = 7.6$  Hz, 1H;  $\text{H}_{\text{Ar}}$ ), 7.43 – 7.32 (m, 3H;  $\text{H}_{\text{Ar}}$ ), 7.16 (t,  $J = 7.6$  Hz, 1H;  $\text{H}_{\text{Ar}}$ ), 7.11 (d,  $J = 8.0$  Hz, 2H;  $\text{H}_{\text{Ar}}$ ), 7.05 (d,  $J = 7.6$  Hz, 3H;  $\text{H}_{\text{Ar}}$ ), 2.28 (s, 3H;  $\text{CH}_3$ );  $^{13}\text{C NMR}$  (150 MHz,  $\text{CDCl}_3$ )  $\delta$  157.73 ( $\text{C}_{\text{Ar}}$ ), 156.94 ( $\text{C}_{\text{Ar}}$ ), 145.14 ( $\text{C}_{\text{Ar}}$ ), 139.37 ( $\text{C}_{\text{Ar}}$ ), 138.83 ( $\text{C}_{\text{Ar}}$ ), 134.87 ( $\text{C}_{\text{Ar}}$ ), 129.95 ( $\text{C}_{\text{Ar}}$ ), 129.80 ( $\text{C}_{\text{Ar}}$ ), 126.89 ( $\text{C}_{\text{Ar}}$ ), 126.69 ( $\text{C}_{\text{Ar}}$ ), 126.16 ( $\text{C}_{\text{Ar}}$ ), 124.16 ( $\text{C}_{\text{Ar}}$ ), 123.54 ( $\text{C}_{\text{Ar}}$ ), 122.22 ( $\text{C}_{\text{Ar}}$ ), 120.94 ( $\text{C}_{\text{Ar}}$ ), 119.68 ( $\text{C}_{\text{Ar}}$ ), 118.73 ( $\text{C}_{\text{Ar}}$ ), 115.95 ( $\text{C}_{\text{Ar}}$ ), 115.18 ( $\text{C}_{\text{Ar}}$ ), 106.44 ( $\text{C}_{\text{Ar}}$ ), 21.65 ( $\text{CH}_3$ ); **HRMS (ESI)**  $m/z$  calcd for  $\text{C}_{25}\text{H}_{20}\text{NO}_3\text{S}^+$  ( $\text{M}+\text{H}$ ) $^+$  414.1158, found 414.1157.

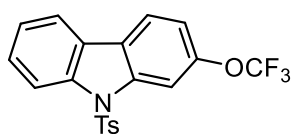

**9-Tosyl-2-(trifluoromethoxy)-9H-carbazole (2at):** yellow solid; Yield 95%, 6h;  $^1\text{H NMR}$  (600 MHz,  $\text{CDCl}_3$ )  $\delta$  8.34 (d,  $J = 8.4$  Hz, 1H;  $\text{H}_{\text{Ar}}$ ), 8.25 (s, 1H;  $\text{H}_{\text{Ar}}$ ), 7.87 (d,  $J = 8.3$  Hz, 2H;  $\text{H}_{\text{Ar}}$ ), 7.70 (d,  $J = 8.4$  Hz, 2H;  $\text{H}_{\text{Ar}}$ ), 7.52 (t,  $J = 7.8$  Hz, 1H;  $\text{H}_{\text{Ar}}$ ), 7.38 (t,  $J = 7.5$  Hz, 1H;  $\text{H}_{\text{Ar}}$ ), 7.24 (d,  $J = 8.4$  Hz, 1H;  $\text{H}_{\text{Ar}}$ ), 7.12 (d,  $J = 8.4$  Hz, 2H;  $\text{H}_{\text{Ar}}$ ), 2.27 (s, 3H;  $\text{CH}_3$ );  $^{13}\text{C NMR}$  (150 MHz,  $\text{CDCl}_3$ )  $\delta$  148.37 (d,  $J = 1.8$  Hz) ( $\text{C}_{\text{Ar}}$ ), 145.46 ( $\text{C}_{\text{Ar}}$ ), 139.09 ( $\text{C}_{\text{Ar}}$ ), 138.65 ( $\text{C}_{\text{Ar}}$ ), 134.64 ( $\text{C}_{\text{Ar}}$ ), 129.93 ( $\text{C}_{\text{Ar}}$ ), 127.87 ( $\text{C}_{\text{Ar}}$ ), 126.65 ( $\text{C}_{\text{Ar}}$ ), 125.47 ( $\text{C}_{\text{Ar}}$ ), 125.14 ( $\text{C}_{\text{Ar}}$ ), 124.38 ( $\text{C}_{\text{Ar}}$ ), 120.84 ( $\text{C}_{\text{Ar}}$ ), 120.73 (q,  $J = 257.2$  Hz) ( $\text{C}_{\text{Ar}}$ ), 120.22 ( $\text{C}_{\text{Ar}}$ ), 117.41 ( $\text{C}_{\text{Ar}}$ ), 115.29 ( $\text{C}_{\text{Ar}}$ ), 108.93 ( $\text{C}_{\text{Ar}}$ ), 21.64 ( $\text{CH}_3$ );  $^{19}\text{F NMR}$  (376 MHz,  $\text{CDCl}_3$ )  $\delta$  -57.86 (s, 3F); **HRMS (ESI)**  $m/z$  calcd for  $\text{C}_{20}\text{H}_{15}\text{F}_3\text{NO}_3\text{S}^+$  ( $\text{M}+\text{H}$ ) $^+$  406.0719, found 406.0725.

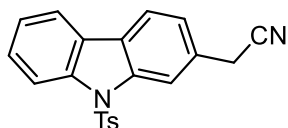

**2-(9-Tosyl-9H-carbazol-2-yl)acetonitrile (2au):** yellow solid; Yield 83%, 6h;  $^1\text{H NMR}$  (400 MHz,  $\text{CDCl}_3$ )  $\delta$  8.35 – 8.24 (m, 2H;  $\text{H}_{\text{Ar}}$ ), 7.87 (dd,  $J = 7.6, 4.6$  Hz, 2H;  $\text{H}_{\text{Ar}}$ ), 7.70 (d,  $J = 8.2$  Hz, 2H;  $\text{H}_{\text{Ar}}$ ), 7.51 (t,  $J = 7.6$  Hz, 1H;  $\text{H}_{\text{Ar}}$ ), 7.41 – 7.30 (m, 2H;  $\text{H}_{\text{Ar}}$ ), 7.11 (d,  $J = 8.1$  Hz, 2H;  $\text{H}_{\text{Ar}}$ ), 3.93 (s, 2H;  $\text{CH}_2$ ), 2.26 (s, 3H;  $\text{CH}_3$ );  $^{13}\text{C NMR}$  (101 MHz,  $\text{CDCl}_3$ )  $\delta$  145.30 ( $\text{C}_{\text{Ar}}$ ), 138.79 ( $\text{C}_{\text{Ar}}$ ), 138.73 ( $\text{C}_{\text{Ar}}$ ), 134.88 ( $\text{C}_{\text{Ar}}$ ), 129.92 ( $\text{C}_{\text{Ar}}$ ), 129.35 ( $\text{C}_{\text{Ar}}$ ), 127.91 ( $\text{C}_{\text{Ar}}$ ), 126.59 ( $\text{C}_{\text{Ar}}$ ), 126.28 ( $\text{C}_{\text{Ar}}$ ), 125.72 ( $\text{C}_{\text{Ar}}$ ), 124.20 ( $\text{C}_{\text{Ar}}$ ), 123.77 ( $\text{C}_{\text{Ar}}$ ), 120.76 ( $\text{C}_{\text{Ar}}$ ), 120.26 (CN), 118.03 ( $\text{C}_{\text{Ar}}$ ), 115.22 ( $\text{C}_{\text{Ar}}$ ), 114.82 ( $\text{C}_{\text{Ar}}$ ), 24.34 ( $\text{CH}_2$ ), 21.60 ( $\text{CH}_3$ ); **HRMS (ESI)**  $m/z$  calcd for  $\text{C}_{21}\text{H}_{17}\text{N}_2\text{O}_2\text{S}^+$  ( $\text{M}+\text{H}$ ) $^+$  361.1005, found 361.1008.

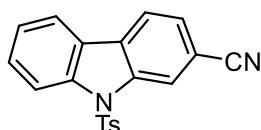

**9-Tosyl-9H-carbazole-2-carbonitrile (2av):** yellow solid; Yield 83%, 6h;  $^1\text{H NMR}$  (400 MHz,  $\text{CDCl}_3$ )  $\delta$  8.66 (s, 1H), 8.36 (d,  $J = 8.4$  Hz, 1H;  $\text{H}_{\text{Ar}}$ ), 7.98 (dd,  $J = 12.8, 8.0$  Hz, 2H;  $\text{H}_{\text{Ar}}$ ), 7.72 (d,  $J = 8.0$  Hz, 2H;  $\text{H}_{\text{Ar}}$ ), 7.61 (dd,  $J = 15.6, 8.0$  Hz, 2H;  $\text{H}_{\text{Ar}}$ ), 7.43 (t,  $J = 7.6$  Hz, 1H;  $\text{H}_{\text{Ar}}$ ), 7.16 (d,  $J = 8.0$  Hz, 2H;  $\text{H}_{\text{Ar}}$ ), 2.30 (s, 3H;  $\text{CH}_3$ );  $^{13}\text{C NMR}$  (150 MHz,  $\text{CDCl}_3$ )  $\delta$  145.78 ( $\text{C}_{\text{Ar}}$ ), 139.45 ( $\text{C}_{\text{Ar}}$ ), 137.68 ( $\text{C}_{\text{Ar}}$ ), 134.64 ( $\text{C}_{\text{Ar}}$ ), 130.13 ( $\text{C}_{\text{Ar}}$ ), 129.51 ( $\text{C}_{\text{Ar}}$ ), 127.36 ( $\text{C}_{\text{Ar}}$ ), 126.68 ( $\text{C}_{\text{Ar}}$ ), 124.89 ( $\text{C}_{\text{Ar}}$ ), 124.60 ( $\text{C}_{\text{Ar}}$ ), 121.07 ( $\text{C}_{\text{Ar}}$ ), 120.93 ( $\text{C}_{\text{Ar}}$ ), 119.46 (CN), 119.17 ( $\text{C}_{\text{Ar}}$ ), 115.29 ( $\text{C}_{\text{Ar}}$ ), 110.33 ( $\text{C}_{\text{Ar}}$ ), 21.72 ( $\text{CH}_3$ ); **HRMS (ESI)**  $m/z$  calcd for  $\text{C}_{20}\text{H}_{15}\text{N}_2\text{O}_2\text{S}^+$  ( $\text{M}+\text{H}$ ) $^+$  347.0849, found 347.0851.

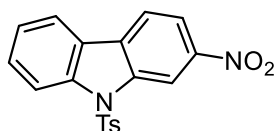

**2-Nitro-9-tosyl-9H-carbazole (2aw/2be):** white solid; Yield 47% from 1ax, 12h; Yield 23% from 1be, 12h;  $^1\text{H NMR}$  (400 MHz,  $\text{CDCl}_3$ )  $\delta$  9.23 (d,  $J = 2.0$  Hz, 1H;  $\text{H}_{\text{Ar}}$ ), 8.39 (d,  $J = 8.4$  Hz, 1H;  $\text{H}_{\text{Ar}}$ ), 8.28 (dd,  $J = 8.4, 2.0$  Hz, 1H;  $\text{H}_{\text{Ar}}$ ), 8.01 (t,  $J = 8.0$  Hz, 2H;  $\text{H}_{\text{Ar}}$ ), 7.76 (d,  $J = 8.4$  Hz, 2H;  $\text{H}_{\text{Ar}}$ ), 7.63 (t,  $J = 8.4$  Hz, 1H;  $\text{H}_{\text{Ar}}$ ), 7.45 (t,  $J = 7.6$  Hz, 1H;  $\text{H}_{\text{Ar}}$ ), 7.17 (d,  $J = 8.0$  Hz, 2H;  $\text{H}_{\text{Ar}}$ ), 2.30 (s, 3H;  $\text{CH}_3$ );  $^{13}\text{C NMR}$  (101 MHz,  $\text{CDCl}_3$ )  $\delta$  158.00 ( $\text{C}_{\text{Ar}}$ ), 147.37 ( $\text{C}_{\text{Ar}}$ ), 145.82 ( $\text{C}_{\text{Ar}}$ ), 136.21 ( $\text{C}_{\text{Ar}}$ ), 133.02 ( $\text{C}_{\text{Ar}}$ ), 132.92 ( $\text{C}_{\text{Ar}}$ ), 130.17 ( $\text{C}_{\text{Ar}}$ ), 129.79 ( $\text{C}_{\text{Ar}}$ ), 126.80 ( $\text{C}_{\text{Ar}}$ ), 124.72 ( $\text{C}_{\text{Ar}}$ ), 120.28 ( $\text{C}_{\text{Ar}}$ ), 119.36 ( $\text{C}_{\text{Ar}}$ ), 116.25 ( $\text{C}_{\text{Ar}}$ ), 115.45 ( $\text{C}_{\text{Ar}}$ ), 111.28 ( $\text{C}_{\text{Ar}}$ ), 111.25 ( $\text{C}_{\text{Ar}}$ ), 21.71 ( $\text{CH}_3$ ); **HRMS (ESI)**  $m/z$  calcd for  $\text{C}_{19}\text{H}_{15}\text{N}_2\text{O}_4\text{S}^+$  ( $\text{M}+\text{H}$ ) $^+$  367.0704, found 367.0702.

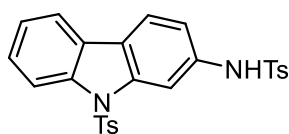

**4-Methyl-N-(9-tosyl-9H-carbazol-2-yl)benzenesulfonamide (2ax):** red solid; Yield 75%, 6h;  $^1\text{H NMR}$  (400 MHz,  $\text{CDCl}_3$ )  $\delta$  8.28 (d,  $J = 8.4$  Hz, 1H;  $\text{H}_{\text{Ar}}$ ), 8.10 (d,  $J = 1.5$  Hz, 1H;  $\text{H}_{\text{Ar}}$ ), 7.79 (d,  $J = 7.6$  Hz, 1H;  $\text{H}_{\text{Ar}}$ ), 7.73 (t,  $J = 8.9$  Hz, 3H;  $\text{H}_{\text{Ar}}$ ), 7.65 (d,  $J = 8.3$  Hz, 2H;  $\text{H}_{\text{Ar}}$ ), 7.44 (dd,  $J = 11.5, 4.1$  Hz, 1H;  $\text{H}_{\text{Ar}}$ ), 7.32 (t,  $J = 7.2$  Hz, 1H;  $\text{H}_{\text{Ar}}$ ), 7.23 (d,  $J = 8.0$  Hz, 2H;  $\text{H}_{\text{Ar}}$ ), 7.10 (dd,  $J = 10.8, 4.7$  Hz, 4H;  $\text{H}_{\text{Ar}}$ ), 2.36 (s, 3H;  $\text{CH}_3$ ), 2.27 (s, 3H;  $\text{CH}_3$ );  $^{13}\text{C NMR}$  (101 MHz,  $\text{CDCl}_3$ )  $\delta$  145.16 ( $\text{C}_{\text{Ar}}$ ), 144.13 ( $\text{C}_{\text{Ar}}$ ), 138.85 ( $\text{C}_{\text{Ar}}$ ), 138.75 ( $\text{C}_{\text{Ar}}$ ), 136.18 ( $\text{C}_{\text{Ar}}$ ), 136.13 ( $\text{C}_{\text{Ar}}$ ), 134.83 ( $\text{C}_{\text{Ar}}$ ), 129.88 ( $\text{C}_{\text{Ar}}$ ), 129.85 ( $\text{C}_{\text{Ar}}$ ), 127.61 ( $\text{C}_{\text{Ar}}$ ), 127.32 ( $\text{C}_{\text{Ar}}$ ), 126.76 ( $\text{C}_{\text{Ar}}$ ), 125.89 ( $\text{C}_{\text{Ar}}$ ), 124.17 ( $\text{C}_{\text{Ar}}$ ), 123.63 ( $\text{C}_{\text{Ar}}$ ), 120.75 ( $\text{C}_{\text{Ar}}$ ), 119.86 ( $\text{C}_{\text{Ar}}$ ), 117.77 ( $\text{C}_{\text{Ar}}$ ), 115.17 ( $\text{C}_{\text{Ar}}$ ), 108.04 ( $\text{C}_{\text{Ar}}$ ), 21.69 ( $\text{CH}_3$ ), 21.65 ( $\text{CH}_3$ ); **HRMS (ESI)**  $m/z$  calcd for  $\text{C}_{26}\text{H}_{23}\text{N}_2\text{O}_4\text{S}_2^+$  ( $\text{M}+\text{H}$ ) $^+$  491.1094, found 491.1098.

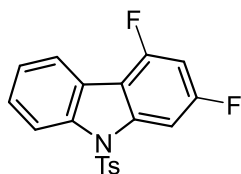

**2,4-Difluoro-9-tosyl-9H-carbazole (2ay):** white solid; Yield 91%, 6h;  $^1\text{H}$  NMR (400 MHz,  $\text{CDCl}_3$ )  $\delta$  8.30 (d,  $J = 8.4$  Hz, 1H;  $\text{H}_{\text{Ar}}$ ), 8.00 (d,  $J = 7.7$  Hz, 1H;  $\text{H}_{\text{Ar}}$ ), 7.91 (d,  $J = 9.8$  Hz, 1H;  $\text{H}_{\text{Ar}}$ ), 7.72 (d,  $J = 8.1$  Hz, 2H;  $\text{H}_{\text{Ar}}$ ), 7.50 (t,  $J = 7.9$  Hz, 1H;  $\text{H}_{\text{Ar}}$ ), 7.38 (t,  $J = 7.6$  Hz, 1H;  $\text{H}_{\text{Ar}}$ ), 7.16 (d,  $J = 8.2$  Hz, 2H;  $\text{H}_{\text{Ar}}$ ), 6.84 (t,  $J = 9.5$  Hz, 1H;  $\text{H}_{\text{Ar}}$ ), 2.30 (s, 3H;  $\text{CH}_3$ );  $^{13}\text{C}$  NMR (101 MHz,  $\text{CDCl}_3$ )  $\delta$  163.37 (d,  $J = 12.0$  Hz) ( $\text{C}_{\text{Ar}}$ ), 160.93 (d,  $J = 12.1$  Hz) ( $\text{C}_{\text{Ar}}$ ), 158.77 (d,  $J = 14.8$  Hz) ( $\text{C}_{\text{Ar}}$ ), 156.27 (d,  $J = 14.8$  Hz) ( $\text{C}_{\text{Ar}}$ ), 145.63 ( $\text{C}_{\text{Ar}}$ ), 140.18 ( $\text{C}_{\text{Ar}}$ ), 140.03 ( $\text{C}_{\text{Ar}}$ ), 139.92 ( $\text{C}_{\text{Ar}}$ ), 138.31 (d,  $J = 2.2$  Hz) ( $\text{C}_{\text{Ar}}$ ), 134.70 ( $\text{C}_{\text{Ar}}$ ), 120.04 ( $\text{C}_{\text{Ar}}$ ), 127.38 ( $\text{C}_{\text{Ar}}$ ), 126.71 ( $\text{C}_{\text{Ar}}$ ), 124.66 ( $\text{C}_{\text{Ar}}$ ), 123.19 ( $\text{C}_{\text{Ar}}$ ), 122.62 (d,  $J = 4.7$  Hz) ( $\text{C}_{\text{Ar}}$ ), 114.87 ( $\text{C}_{\text{Ar}}$ ), 111.53 (d,  $J = 19.8$  Hz) ( $\text{C}_{\text{Ar}}$ ), 100.07 ( $\text{C}_{\text{Ar}}$ ), 99.82 (d,  $J = 4.9$  Hz) ( $\text{C}_{\text{Ar}}$ ), 99.57 ( $\text{C}_{\text{Ar}}$ ), 99.16 (d,  $J = 4.4$  Hz) ( $\text{C}_{\text{Ar}}$ ), 98.87 (d,  $J = 4.3$  Hz) ( $\text{C}_{\text{Ar}}$ ), 21.70 ( $\text{CH}_3$ );  $^{19}\text{F}$  NMR (376 MHz,  $\text{CDCl}_3$ )  $\delta$  -33.47 (td,  $J = 9.6, 6.6$  Hz, 1F), -39.75 (dd,  $J = 9.7, 6.7$  Hz, 1F); HRMS (ESI)  $m/z$  calcd for  $\text{C}_{19}\text{H}_{14}\text{F}_2\text{NO}_2\text{S}^+$  ( $\text{M}+\text{H}$ ) $^+$  358.0708, found 358.0702.

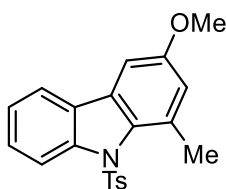

**3-methoxy-1-methyl-9-tosyl-9H-carbazole (2az):** pale yellow solid; Yield 65%, 6h;  $^1\text{H}$  NMR (400 MHz,  $\text{CDCl}_3$ ):  $\delta$  8.20 (dd,  $J = 8.3, 2.5$  Hz, 1H;  $\text{H}_{\text{Ar}}$ ), 7.61 – 7.54 (m, 1H;  $\text{H}_{\text{Ar}}$ ), 7.41 (tdd,  $J = 8.4, 2.9, 1.4$  Hz, 1H;  $\text{H}_{\text{Ar}}$ ), 7.33 – 7.25 (m, 1H;  $\text{H}_{\text{Ar}}$ ), 7.06 – 7.00 (m, 3H;  $\text{H}_{\text{Ar}}$ ), 6.87 (dd,  $J = 7.9, 2.4$  Hz, 3H;  $\text{H}_{\text{Ar}}$ ), 3.90 (s, 3H;  $\text{CH}_3$ ), 2.83 (s, 3H;  $\text{CH}_3$ ), 2.22 (s, 3H;  $\text{CH}_3$ );  $^{13}\text{C}$  NMR (101 MHz,  $\text{CDCl}_3$ ):  $\delta$  157.90 ( $\text{C}_{\text{Ar}}$ ), 144.10 ( $\text{C}_{\text{Ar}}$ ), 142.43 ( $\text{C}_{\text{Ar}}$ ), 134.47 ( $\text{C}_{\text{Ar}}$ ), 132.53 ( $\text{C}_{\text{Ar}}$ ), 132.47 ( $\text{C}_{\text{Ar}}$ ), 132.05 ( $\text{C}_{\text{Ar}}$ ), 130.20 ( $\text{C}_{\text{Ar}}$ ), 128.69 ( $\text{C}_{\text{Ar}}$ ), 127.23 ( $\text{C}_{\text{Ar}}$ ), 127.15 ( $\text{C}_{\text{Ar}}$ ), 125.52 ( $\text{C}_{\text{Ar}}$ ), 119.96 ( $\text{C}_{\text{Ar}}$ ), 119.66 ( $\text{C}_{\text{Ar}}$ ), 117.63 ( $\text{C}_{\text{Ar}}$ ), 101.19 ( $\text{C}_{\text{Ar}}$ ), 55.72 ( $\text{CH}_3$ ), 21.88 ( $\text{CH}_3$ ), 21.60 ( $\text{CH}_3$ ); HRMS (ESI)  $m/z$  calcd for  $\text{C}_{21}\text{H}_{19}\text{NNaO}_3\text{S}^+$  ( $\text{M}+\text{Na}$ ) $^+$  388.0978, found 388.0975.

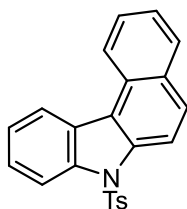

**7-Tosyl-7H-benzo[c]carbazole (2aa')**: white solid; Yield 89%, 12h;  $^1\text{H}$  NMR (400 MHz,  $\text{CDCl}_3$ )  $\delta$  8.71 (d,  $J = 8.4$  Hz, 1H;  $\text{H}_{\text{Ar}}$ ), 8.61 (d,  $J = 9.2$  Hz, 1H;  $\text{H}_{\text{Ar}}$ ), 8.53 (d,  $J = 8.4$  Hz, 1H;  $\text{H}_{\text{Ar}}$ ), 8.47 (d,  $J = 7.6$  Hz, 1H;  $\text{H}_{\text{Ar}}$ ), 8.00 (d,  $J = 8.0$  Hz, 1H;  $\text{H}_{\text{Ar}}$ ), 7.95 (d,  $J = 9.2$  Hz, 1H;  $\text{H}_{\text{Ar}}$ ), 7.69 (d,  $J = 8.0$  Hz, 3H;  $\text{H}_{\text{Ar}}$ ), 7.52 (dt,  $J = 20.0, 7.6$  Hz, 3H;  $\text{H}_{\text{Ar}}$ ), 7.05 (d,  $J = 8.0$  Hz, 2H;  $\text{H}_{\text{Ar}}$ ), 2.21 (s, 3H;  $\text{CH}_3$ );  $^{13}\text{C}$  NMR (101 MHz,  $\text{CDCl}_3$ )  $\delta$  145.07 ( $\text{C}_{\text{Ar}}$ ), 138.31 ( $\text{C}_{\text{Ar}}$ ), 136.73 ( $\text{C}_{\text{Ar}}$ ), 135.17 ( $\text{C}_{\text{Ar}}$ ), 131.17 ( $\text{C}_{\text{Ar}}$ ), 129.80 ( $\text{C}_{\text{Ar}}$ ), 129.26 ( $\text{C}_{\text{Ar}}$ ), 128.93 ( $\text{C}_{\text{Ar}}$ ), 128.71 ( $\text{C}_{\text{Ar}}$ ), 127.43 ( $\text{C}_{\text{Ar}}$ ), 127.26 ( $\text{C}_{\text{Ar}}$ ), 126.53 ( $\text{C}_{\text{Ar}}$ ), 126.30 ( $\text{C}_{\text{Ar}}$ ), 125.00 ( $\text{C}_{\text{Ar}}$ ), 124.44 ( $\text{C}_{\text{Ar}}$ ), 123.66 ( $\text{C}_{\text{Ar}}$ ), 122.27 ( $\text{C}_{\text{Ar}}$ ), 120.01 ( $\text{C}_{\text{Ar}}$ ), 115.58 ( $\text{C}_{\text{Ar}}$ ), 115.09 ( $\text{C}_{\text{Ar}}$ ), 21.58 ( $\text{CH}_3$ ); HRMS (ESI)  $m/z$  calcd for  $\text{C}_{23}\text{H}_{18}\text{NO}_2\text{S}^+$  ( $\text{M}+\text{H}$ ) $^+$  372.1053, found 372.1052.

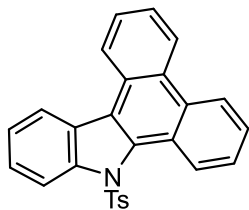

**9-Tosyl-9H-dibenzo[*a,c*]carbazole (2ab')**: white solid; Yield 41%, 12h; **<sup>1</sup>H NMR (400 MHz, CDCl<sub>3</sub>)** δ 8.97 (d, *J* = 7.6 Hz, 1H; H<sub>Ar</sub>), 8.82 (d, *J* = 7.6 Hz, 1H; H<sub>Ar</sub>), 8.75 (d, *J* = 7.6 Hz, 1H; H<sub>Ar</sub>), 8.56 (d, *J* = 7.6 Hz, 1H; H<sub>Ar</sub>), 8.42 (d, *J* = 8.0 Hz, 1H; H<sub>Ar</sub>), 8.18 (d, *J* = 7.6 Hz, 1H; H<sub>Ar</sub>), 7.78 – 7.67 (m, 4H; H<sub>Ar</sub>), 7.44 (dt, *J* = 21.6, 7.6 Hz, 2H; H<sub>Ar</sub>), 6.84 (d, *J* = 8.0 Hz, 2H; H<sub>Ar</sub>), 6.68 (d, *J* = 8.0 Hz, 2H; H<sub>Ar</sub>), 2.09 (s, 3H; CH<sub>3</sub>); **<sup>13</sup>C NMR (150 MHz, CDCl<sub>3</sub>)** δ 144.38 (C<sub>Ar</sub>), 142.17 (C<sub>Ar</sub>), 137.01 (C<sub>Ar</sub>), 131.07 (C<sub>Ar</sub>), 130.81 (C<sub>Ar</sub>), 130.77 (C<sub>Ar</sub>), 130.26 (C<sub>Ar</sub>), 128.82 (C<sub>Ar</sub>), 128.57 (C<sub>Ar</sub>), 127.79 (C<sub>Ar</sub>), 127.37 (C<sub>Ar</sub>), 127.20 (C<sub>Ar</sub>), 127.12 (C<sub>Ar</sub>), 126.51 (C<sub>Ar</sub>), 126.25 (C<sub>Ar</sub>), 126.08 (C<sub>Ar</sub>), 126.02 (C<sub>Ar</sub>), 125.79 (C<sub>Ar</sub>), 124.37 (C<sub>Ar</sub>), 124.19 (C<sub>Ar</sub>), 123.83 (C<sub>Ar</sub>), 122.97 (C<sub>Ar</sub>), 121.97 (C<sub>Ar</sub>), 120.08 (C<sub>Ar</sub>), 21.52 (CH<sub>3</sub>); **HRMS (ESI)** *m/z* calcd for C<sub>27</sub>H<sub>20</sub>NO<sub>2</sub>S<sup>+</sup> (M+H)<sup>+</sup> 422.1209, found 422.1210.

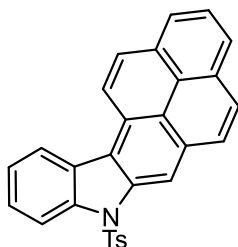

**7-Tosyl-7H-phenaleno[1,9-*bc*]carbazole (2ac')**: yellow solid; Yield 39%, 12h; **<sup>1</sup>H NMR (400 MHz, CDCl<sub>3</sub>)** δ 9.27 (s, 1H; H<sub>Ar</sub>), 9.03 (d, *J* = 9.2 Hz, 1H; H<sub>Ar</sub>), 8.75 – 8.68 (m, 1H; H<sub>Ar</sub>), 8.63 (d, *J* = 8.1 Hz, 1H; H<sub>Ar</sub>), 8.36 (d, *J* = 9.0 Hz, 1H; H<sub>Ar</sub>), 8.33 – 8.25 (m, 2H; H<sub>Ar</sub>), 8.17 (d, *J* = 8.9 Hz, 1H; H<sub>Ar</sub>), 8.08 (t, *J* = 7.6 Hz, 1H; H<sub>Ar</sub>), 7.80 – 7.73 (m, 2H; H<sub>Ar</sub>), 7.70 – 7.57 (m, 2H; H<sub>Ar</sub>), 7.06 (d, *J* = 8.4 Hz, 2H; H<sub>Ar</sub>), 2.22 (s, 3H; CH<sub>3</sub>); **<sup>13</sup>C NMR (101 MHz, CDCl<sub>3</sub>)** δ 145.11 (C<sub>Ar</sub>), 139.39 (C<sub>Ar</sub>), 137.22 (C<sub>Ar</sub>), 134.92 (C<sub>Ar</sub>), 132.09 (C<sub>Ar</sub>), 131.21 (C<sub>Ar</sub>), 131.02 (C<sub>Ar</sub>), 130.31 (C<sub>Ar</sub>), 129.80 (C<sub>Ar</sub>), 129.11 (C<sub>Ar</sub>), 128.43 (C<sub>Ar</sub>), 127.99 (C<sub>Ar</sub>), 127.42 (C<sub>Ar</sub>), 127.11 (C<sub>Ar</sub>), 126.93 (C<sub>Ar</sub>), 126.59 (C<sub>Ar</sub>), 126.29 (C<sub>Ar</sub>), 125.92 (C<sub>Ar</sub>), 125.85 (C<sub>Ar</sub>), 125.75 (C<sub>Ar</sub>), 124.97 (C<sub>Ar</sub>), 124.58 (C<sub>Ar</sub>), 123.09 (C<sub>Ar</sub>), 122.91 (C<sub>Ar</sub>), 122.41 (C<sub>Ar</sub>), 115.67 (C<sub>Ar</sub>), 111.68 (C<sub>Ar</sub>), 21.59 (CH<sub>3</sub>); **HRMS (ESI)** *m/z* calcd for C<sub>29</sub>H<sub>20</sub>NO<sub>2</sub>S (M+H)<sup>+</sup> 446.1209, found 446.1213.

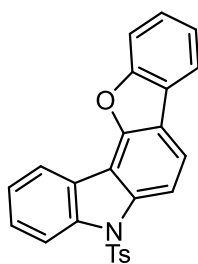

**5-Tosyl-5H-benzofuro[3,2-*c*]carbazole (2ad')**: white solid; Yield 71%, 12h; **<sup>1</sup>H NMR (400 MHz, CDCl<sub>3</sub>)** δ 8.40 (dd, *J* = 13.2, 8.4 Hz, 3H; H<sub>Ar</sub>), 8.02 (dd, *J* = 15.2, 8.0 Hz, 2H; H<sub>Ar</sub>), 7.70 (dd, *J* = 13.6, 8.4 Hz, 3H; H<sub>Ar</sub>), 7.56 (t, *J* = 7.6 Hz, 1H; H<sub>Ar</sub>), 7.48 (dd, *J* = 14.4, 7.2 Hz, 2H; H<sub>Ar</sub>), 7.39 (t, *J* = 7.2 Hz, 1H; H<sub>Ar</sub>), 7.08 (d, *J* = 8.0 Hz, 2H; H<sub>Ar</sub>), 2.24 (s, 3H; CH<sub>3</sub>); **<sup>13</sup>C NMR (150 MHz, CDCl<sub>3</sub>)** δ 156.69 (C<sub>Ar</sub>), 150.37 (C<sub>Ar</sub>), 150.33 (C<sub>Ar</sub>), 145.17 (C<sub>Ar</sub>), 138.46 (C<sub>Ar</sub>), 138.40 (C<sub>Ar</sub>), 134.90 (C<sub>Ar</sub>), 129.82 (C<sub>Ar</sub>), 127.39 (C<sub>Ar</sub>), 126.67 (C<sub>Ar</sub>), 126.61 (C<sub>Ar</sub>), 124.56 (C<sub>Ar</sub>), 124.25 (C<sub>Ar</sub>), 123.34 (C<sub>Ar</sub>), 122.84 (C<sub>Ar</sub>), 120.48 (C<sub>Ar</sub>), 120.38 (C<sub>Ar</sub>), 119.25 (C<sub>Ar</sub>), 115.34 (C<sub>Ar</sub>), 112.25 (C<sub>Ar</sub>), 111.96 (C<sub>Ar</sub>), 110.43 (C<sub>Ar</sub>), 21.64 (CH<sub>3</sub>); **HRMS (ESI)** *m/z* calcd for C<sub>25</sub>H<sub>18</sub>NO<sub>3</sub>S<sup>+</sup> (M+H)<sup>+</sup> 412.1002, found 412.1004.

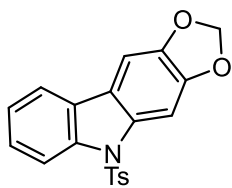

**5-Tosyl-5H-[1,3]dioxolo[4,5-*b*]carbazole (2ae')**: white solid; Yield 47%, 12h;  $^1\text{H NMR}$  (400 MHz,  $\text{CDCl}_3$ )  $\delta$  8.27 (d,  $J = 8.3$  Hz, 1H;  $\text{H}_{\text{Ar}}$ ), 7.86 (s, 1H;  $\text{H}_{\text{Ar}}$ ), 7.72 (d,  $J = 7.8$  Hz, 1H;  $\text{H}_{\text{Ar}}$ ), 7.66 (d,  $J = 8.3$  Hz, 2H;  $\text{H}_{\text{Ar}}$ ), 7.39 (t,  $J = 7.2$  Hz, 1H;  $\text{H}_{\text{Ar}}$ ), 7.31 (t,  $J = 7.5$  Hz, 1H;  $\text{H}_{\text{Ar}}$ ), 7.24 (s, 1H;  $\text{H}_{\text{Ar}}$ ), 7.10 (d,  $J = 8.0$  Hz, 2H;  $\text{H}_{\text{Ar}}$ ), 6.06 (s, 2H;  $\text{CH}_2$ ), 2.27 (s, 3H;  $\text{CH}_3$ );  $^{13}\text{C NMR}$  (101 MHz,  $\text{CDCl}_3$ )  $\delta$  148.30 ( $\text{C}_{\text{Ar}}$ ), 145.51 ( $\text{C}_{\text{Ar}}$ ), 145.00 ( $\text{C}_{\text{Ar}}$ ), 138.59 ( $\text{C}_{\text{Ar}}$ ), 134.96 ( $\text{C}_{\text{Ar}}$ ), 133.55 ( $\text{C}_{\text{Ar}}$ ), 129.80 ( $\text{C}_{\text{Ar}}$ ), 126.88 ( $\text{C}_{\text{Ar}}$ ), 126.65 ( $\text{C}_{\text{Ar}}$ ), 126.10 ( $\text{C}_{\text{Ar}}$ ), 124.00 ( $\text{C}_{\text{Ar}}$ ), 120.46 ( $\text{C}_{\text{Ar}}$ ), 119.12 ( $\text{C}_{\text{Ar}}$ ), 115.46 ( $\text{C}_{\text{Ar}}$ ), 101.84 ( $\text{C}_{\text{Ar}}$ ), 99.22 ( $\text{C}_{\text{Ar}}$ ), 97.36 ( $\text{CH}_2$ ), 21.66 ( $\text{CH}_3$ ); **HRMS (ESI)**  $m/z$  calcd for  $\text{C}_{20}\text{H}_{16}\text{NO}_4\text{S}^+$  ( $\text{M}+\text{H}$ ) $^+$  366.0795, found 366.0797.

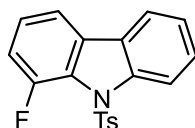

**1-Fluoro-9-tosyl-9H-carbazole (2bd)**: yellow solid; Yield 51%, 6h;  $^1\text{H NMR}$  (400 MHz,  $\text{CDCl}_3$ )  $\delta$  8.45 (d,  $J = 8.4$  Hz, 1H;  $\text{H}_{\text{Ar}}$ ), 7.92 (d,  $J = 7.2$  Hz, 1H;  $\text{H}_{\text{Ar}}$ ), 7.75 (d,  $J = 8.0$  Hz, 2H;  $\text{H}_{\text{Ar}}$ ), 7.70 (dd,  $J = 7.6, 0.8$  Hz, 1H;  $\text{H}_{\text{Ar}}$ ), 7.58 – 7.51 (m, 1H;  $\text{H}_{\text{Ar}}$ ), 7.40 (t,  $J = 7.6$  Hz, 1H;  $\text{H}_{\text{Ar}}$ ), 7.27 (td,  $J = 7.8, 4.0$  Hz, 1H;  $\text{H}_{\text{Ar}}$ ), 7.21 – 7.09 (m, 3H;  $\text{H}_{\text{Ar}}$ ), 2.33 (s, 3H;  $\text{CH}_3$ );  $^{13}\text{C NMR}$  (150 MHz,  $\text{CDCl}_3$ )  $\delta$  150.62 (d,  $J = 252.5$  Hz) ( $\text{C}_{\text{Ar}}$ ), 145.00 ( $\text{C}_{\text{Ar}}$ ), 140.39 ( $\text{C}_{\text{Ar}}$ ), 136.11 ( $\text{C}_{\text{Ar}}$ ), 130.74 (d,  $J = 3.3$  Hz) ( $\text{C}_{\text{Ar}}$ ), 129.84 ( $\text{C}_{\text{Ar}}$ ), 128.37 ( $\text{C}_{\text{Ar}}$ ), 127.27 ( $\text{C}_{\text{Ar}}$ ), 127.25 ( $\text{C}_{\text{Ar}}$ ), 126.05 (d,  $J = 2.8$  Hz) ( $\text{C}_{\text{Ar}}$ ), 125.62 (d,  $J = 9.9$  Hz) ( $\text{C}_{\text{Ar}}$ ), 125.09 (d,  $J = 7.2$  Hz) ( $\text{C}_{\text{Ar}}$ ), 124.34 ( $\text{C}_{\text{Ar}}$ ), 120.29 ( $\text{C}_{\text{Ar}}$ ), 116.52 ( $\text{C}_{\text{Ar}}$ ), 115.87 (d,  $J = 3.3$  Hz) ( $\text{C}_{\text{Ar}}$ ), 115.07 (d,  $J = 22.0$  Hz) ( $\text{C}_{\text{Ar}}$ ), 77.37 ( $\text{C}_{\text{Ar}}$ ), 77.16 ( $\text{C}_{\text{Ar}}$ ), 76.95 ( $\text{C}_{\text{Ar}}$ ), 21.85 ( $\text{CH}_3$ );  $^{19}\text{F NMR}$  (376 MHz,  $\text{CDCl}_3$ )  $\delta$  -40.52 (dd,  $J = 12.4, 4.0$  Hz, 1F); **HRMS (ESI)**  $m/z$  calcd for  $\text{C}_{19}\text{H}_{15}\text{FNO}_2\text{S}$  ( $\text{M}+\text{H}$ ) $^+$  340.0802, found 340.0801.

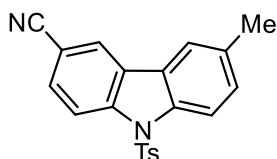

**6-Methyl-9-tosyl-9H-carbazole-3-carbonitrile (2ca)**: yellow oil; Yield 66%, 12h;  $^1\text{H NMR}$  (400 MHz,  $\text{DMSO}-d_6$ )  $\delta$  7.79 (d,  $J = 5.2$  Hz, 1H;  $\text{H}_{\text{Ar}}$ ), 7.50 (d,  $J = 8.0$  Hz, 1H;  $\text{H}_{\text{Ar}}$ ), 7.26 (d,  $J = 7.7$  Hz, 1H;  $\text{H}_{\text{Ar}}$ ), 7.14 (d,  $J = 4.1$  Hz, 1H;  $\text{H}_{\text{Ar}}$ ), 7.06 (d,  $J = 7.9$  Hz, 1H;  $\text{H}_{\text{Ar}}$ ), 6.89 (s, 2H;  $\text{H}_{\text{Ar}}$ ), 6.58 (s, 1H;  $\text{H}_{\text{Ar}}$ ), 6.42 (s, 2H;  $\text{H}_{\text{Ar}}$ ), 1.58 (d,  $J = 5.5$  Hz, 3H;  $\text{CH}_3$ ), 1.38 (d,  $J = 5.5$  Hz, 3H;  $\text{CH}_3$ );  $^{13}\text{C NMR}$  (101 MHz,  $\text{DMSO}-d_6$ )  $\delta$  146.06 ( $\text{C}_{\text{Ar}}$ ), 139.90 ( $\text{C}_{\text{Ar}}$ ), 136.12 ( $\text{C}_{\text{Ar}}$ ), 134.28 ( $\text{C}_{\text{Ar}}$ ), 133.53 ( $\text{C}_{\text{Ar}}$ ), 130.94 ( $\text{C}_{\text{Ar}}$ ), 130.32 ( $\text{C}_{\text{Ar}}$ ), 130.18 ( $\text{C}_{\text{Ar}}$ ), 126.34 ( $\text{C}_{\text{Ar}}$ ), 126.26 ( $\text{C}_{\text{Ar}}$ ), 125.48 ( $\text{C}_{\text{Ar}}$ ), 124.47 ( $\text{C}_{\text{Ar}}$ ), 121.30 (CN), 118.98 ( $\text{C}_{\text{Ar}}$ ), 115.48 ( $\text{C}_{\text{Ar}}$ ), 114.32 ( $\text{C}_{\text{Ar}}$ ), 106.69 ( $\text{C}_{\text{Ar}}$ ), 21.07 ( $\text{CH}_3$ ), 20.88 ( $\text{CH}_3$ ); **HRMS (ESI)**  $m/z$  calcd for  $\text{C}_{21}\text{H}_{17}\text{N}_2\text{O}_2\text{S}^+$  ( $\text{M}+\text{H}$ ) $^+$  361.1005, found 361.1007.

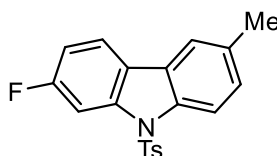

**2-Fluoro-6-methyl-9-tosyl-9H-carbazole (2cb)**: yellow solid; Yield 69%, 12h;  $^1\text{H NMR}$  (400 MHz,  $\text{CDCl}_3$ )  $\delta$  8.16 (d,  $J = 8.5$  Hz, 1H;  $\text{H}_{\text{Ar}}$ ), 8.04 (dd,  $J = 10.3, 2.3$  Hz, 1H;  $\text{H}_{\text{Ar}}$ ), 7.77 (dd,  $J = 8.5, 5.4$  Hz, 1H;  $\text{H}_{\text{Ar}}$ ), 7.71 – 7.67 (m, 2H;  $\text{H}_{\text{Ar}}$ ), 7.62 (s, 1H;  $\text{H}_{\text{Ar}}$ ), 7.28 (s, 1H;  $\text{H}_{\text{Ar}}$ ), 7.08 (ddd,  $J = 11.1, 9.6, 5.2$  Hz, 3H;  $\text{H}_{\text{Ar}}$ ), 2.47 (s, 3H;  $\text{CH}_3$ ), 2.27 (s, 3H;  $\text{CH}_3$ );  $^{13}\text{C NMR}$  (101 MHz,  $\text{CDCl}_3$ )  $\delta$  162.40 (d,  $J = 243.8$  Hz) ( $\text{C}_{\text{Ar}}$ ), 145.17 ( $\text{C}_{\text{Ar}}$ ), 139.36 (d,  $J = 12.4$  Hz) ( $\text{C}_{\text{Ar}}$ ), 136.99 (d,  $J = 2.2$  Hz) ( $\text{C}_{\text{Ar}}$ ), 134.91 ( $\text{C}_{\text{Ar}}$ ), 134.03 ( $\text{C}_{\text{Ar}}$ ), 129.87 ( $\text{C}_{\text{Ar}}$ ), 128.30 ( $\text{C}_{\text{Ar}}$ ), 126.65 ( $\text{C}_{\text{Ar}}$ ), 126.02 ( $\text{C}_{\text{Ar}}$ ), 122.75 (d,  $J = 1.8$  Hz) ( $\text{C}_{\text{Ar}}$ ), 120.82 (d,  $J = 10.0$  Hz) ( $\text{C}_{\text{Ar}}$ ), 119.91 ( $\text{C}_{\text{Ar}}$ ), 114.92 ( $\text{C}_{\text{Ar}}$ ), 111.89 (d,  $J = 24.0$  Hz) ( $\text{C}_{\text{Ar}}$ ), 103.00 (d,  $J = 29.1$  Hz) ( $\text{C}_{\text{Ar}}$ ), 21.64 ( $\text{CH}_3$ ), 21.40 ( $\text{CH}_3$ );  $^{19}\text{F NMR}$  (376 MHz,  $\text{CDCl}_3$ )  $\delta$  -42.70 (td,  $J = 8.5, 4.4$  Hz, 1F); **HRMS (ESI)**  $m/z$  calcd for  $\text{C}_{20}\text{H}_{17}\text{FNO}_2\text{S}^+$  ( $\text{M}+\text{H}$ ) $^+$  354.0959, found 354.0956.

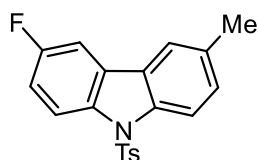

**3-Fluoro-6-methyl-9-tosyl-9H-carbazole (2cc):** yellow solid; Yield 67%, 12h;  $^1\text{H NMR}$  (400 MHz,  $\text{CDCl}_3$ )  $\delta$  8.26 (dd,  $J = 9.1, 4.4$  Hz, 1H;  $\text{H}_{\text{Ar}}$ ), 8.18 (d,  $J = 8.5$  Hz, 1H;  $\text{H}_{\text{Ar}}$ ), 7.62 (dd,  $J = 9.9, 4.5$  Hz, 3H;  $\text{H}_{\text{Ar}}$ ), 7.48 (dd,  $J = 8.3, 2.6$  Hz, 1H;  $\text{H}_{\text{Ar}}$ ), 7.32 (d,  $J = 7.7$  Hz, 1H;  $\text{H}_{\text{Ar}}$ ), 7.17 (td,  $J = 9.0, 2.6$  Hz, 1H;  $\text{H}_{\text{Ar}}$ ), 7.08 (d,  $J = 8.5$  Hz, 2H;  $\text{H}_{\text{Ar}}$ ), 2.47 (s, 3H;  $\text{CH}_3$ ), 2.25 (s, 3H;  $\text{CH}_3$ );  $^{13}\text{C NMR}$  (101 MHz,  $\text{CDCl}_3$ )  $\delta$  160.04 (d,  $J = 241.9$  Hz) ( $\text{C}_{\text{Ar}}$ ), 145.02 ( $\text{C}_{\text{Ar}}$ ), 137.52 ( $\text{C}_{\text{Ar}}$ ), 134.85 (d,  $J = 12.6$  Hz) ( $\text{C}_{\text{Ar}}$ ), 133.97 ( $\text{C}_{\text{Ar}}$ ), 129.76 ( $\text{C}_{\text{Ar}}$ ), 129.40 ( $\text{C}_{\text{Ar}}$ ), 127.97 (d,  $J = 9.5$  Hz) ( $\text{C}_{\text{Ar}}$ ), 126.59 ( $\text{C}_{\text{Ar}}$ ), 126.19 (d,  $J = 3.5$  Hz) ( $\text{C}_{\text{Ar}}$ ), 120.38 ( $\text{C}_{\text{Ar}}$ ), 116.58 (d,  $J = 9.0$  Hz) ( $\text{C}_{\text{Ar}}$ ), 115.34 ( $\text{C}_{\text{Ar}}$ ), 114.75 (d,  $J = 24.7$  Hz) ( $\text{C}_{\text{Ar}}$ ), 106.17 (d,  $J = 24.2$  Hz) ( $\text{C}_{\text{Ar}}$ ), 21.62 ( $\text{CH}_3$ ), 21.38 ( $\text{CH}_3$ );  $^{19}\text{F NMR}$  (376 MHz,  $\text{CDCl}_3$ )  $\delta$  -112.50 (s, 1F); **HRMS (ESI)**  $m/z$  calcd for  $\text{C}_{20}\text{H}_{17}\text{FNO}_2\text{S}^+$  ( $\text{M}+\text{H}$ ) $^+$  354.0959, found 354.0958.

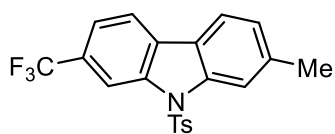

**2-Methyl-9-tosyl-7-(trifluoromethyl)-9H-carbazole (2cd):** white solid; Yield 65%, 12h;  $^1\text{H NMR}$  (400 MHz,  $\text{CDCl}_3$ )  $\delta$  8.58 (s, 1H), 8.17 (s, 1H), 7.92 (d,  $J = 8.0$  Hz, 1H), 7.81 (d,  $J = 8.0$  Hz, 1H), 7.70 (d,  $J = 8.4$  Hz, 2H), 7.59 (d,  $J = 8.0$  Hz, 1H), 7.22 (d,  $J = 7.6$  Hz, 1H), 7.14 (d,  $J = 8.4$  Hz, 2H), 2.58 (s, 3H), 2.28 (s, 3H);  $^{13}\text{C NMR}$  (101 MHz,  $\text{CDCl}_3$ )  $\delta$  145.42 ( $\text{C}_{\text{Ar}}$ ), 139.80 ( $\text{C}_{\text{Ar}}$ ), 139.46 ( $\text{C}_{\text{Ar}}$ ), 137.88 ( $\text{C}_{\text{Ar}}$ ), 134.91 ( $\text{C}_{\text{Ar}}$ ), 129.98 ( $\text{C}_{\text{Ar}}$ ), 129.37 ( $\text{C}_{\text{Ar}}$ ), 128.97 ( $\text{C}_{\text{Ar}}$ ), 128.64 ( $\text{C}_{\text{Ar}}$ ), 125.92 ( $\text{C}_{\text{Ar}}$ ), 125. ( $\text{C}_{\text{Ar}}$ ), 124.76(q,  $J = 272.3$  Hz) ( $\text{C}_{\text{Ar}}$ ), 122.89 ( $\text{C}_{\text{Ar}}$ ), 120.81 (d,  $J = 3.7$  Hz) ( $\text{C}_{\text{Ar}}$ ), 120.37 ( $\text{C}_{\text{Ar}}$ ), 120.08 ( $\text{C}_{\text{Ar}}$ ), 115.48 ( $\text{C}_{\text{Ar}}$ ), 112.57 (d,  $J = 4.2$  Hz) ( $\text{C}_{\text{Ar}}$ ), 22.52 ( $\text{CH}_3$ ), 21.65 ( $\text{CH}_3$ );  $^{19}\text{F NMR}$  (376 MHz,  $\text{CDCl}_3$ )  $\delta$  -61.17 (s, 3F); **HRMS (ESI)**  $m/z$  calcd for  $\text{C}_{21}\text{H}_{17}\text{F}_3\text{NO}_2\text{S}^+$  ( $\text{M}+\text{H}$ ) $^+$  404.0927, found 404.0931.

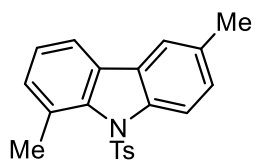

**1,6-Dimethyl-9-tosyl-9H-carbazole (2ce):** white solid; Yield 34%, 12h;  $^1\text{H NMR}$  (400 MHz,  $\text{CDCl}_3$ )  $\delta$  8.06 (d,  $J = 8.4$  Hz, 1H;  $\text{H}_{\text{Ar}}$ ), 7.52 – 7.45 (m, 1H;  $\text{H}_{\text{Ar}}$ ), 7.40 (s, 1H;  $\text{H}_{\text{Ar}}$ ), 7.29 – 7.16 (m, 3H;  $\text{H}_{\text{Ar}}$ ), 7.03 (d,  $J = 8.2$  Hz, 2H;  $\text{H}_{\text{Ar}}$ ), 6.85 (d,  $J = 8.0$  Hz, 2H;  $\text{H}_{\text{Ar}}$ ), 2.81 (s, 3H;  $\text{CH}_3$ ), 2.41 (s, 3H;  $\text{CH}_3$ ), 2.19 (s, 3H;  $\text{CH}_3$ );  $^{13}\text{C NMR}$  (101 MHz,  $\text{CDCl}_3$ )  $\delta$  144.06 ( $\text{C}_{\text{Ar}}$ ), 140.65 ( $\text{C}_{\text{Ar}}$ ), 139.56 ( $\text{C}_{\text{Ar}}$ ), 135.30 ( $\text{C}_{\text{Ar}}$ ), 132.59 ( $\text{C}_{\text{Ar}}$ ), 131.26 ( $\text{C}_{\text{Ar}}$ ), 131.06 ( $\text{C}_{\text{Ar}}$ ), 130.88 ( $\text{C}_{\text{Ar}}$ ), 129.99 ( $\text{C}_{\text{Ar}}$ ), 128.74 ( $\text{C}_{\text{Ar}}$ ), 128.30 ( $\text{C}_{\text{Ar}}$ ), 127.08 ( $\text{C}_{\text{Ar}}$ ), 125.71 ( $\text{C}_{\text{Ar}}$ ), 119.90 ( $\text{C}_{\text{Ar}}$ ), 119.37 ( $\text{C}_{\text{Ar}}$ ), 117.19 ( $\text{C}_{\text{Ar}}$ ), 21.92 ( $\text{CH}_3$ ), 21.60 ( $\text{CH}_3$ ), 21.48 ( $\text{CH}_3$ ); **HRMS (ESI)**  $m/z$  calcd for  $\text{C}_{21}\text{H}_{20}\text{NO}_2\text{S}^+$  ( $\text{M}+\text{H}$ ) $^+$  350.1209, found 350.1210.

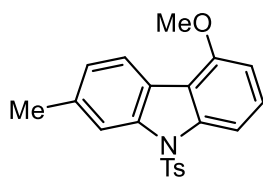

**5-Methoxy-2-methyl-9-tosyl-9H-carbazole (2cf):** white solid; Yield 76%, 12h;  $^1\text{H NMR}$  (400 MHz,  $\text{CDCl}_3$ )  $\delta$  8.14 (s, 1H;  $\text{H}_{\text{Ar}}$ ), 8.07 (d,  $J = 8.0$  Hz, 1H;  $\text{H}_{\text{Ar}}$ ), 7.92 (d,  $J = 8.4$  Hz, 1H;  $\text{H}_{\text{Ar}}$ ), 7.69 (d,  $J = 8.4$  Hz, 2H;  $\text{H}_{\text{Ar}}$ ), 7.36 (t,  $J = 8.4$  Hz, 1H;  $\text{H}_{\text{Ar}}$ ), 7.17 (d,  $J = 8.0$  Hz, 1H;  $\text{H}_{\text{Ar}}$ ), 7.08 (d,  $J = 8.0$  Hz, 2H;  $\text{H}_{\text{Ar}}$ ), 6.80 (d,  $J = 8.0$  Hz, 1H;  $\text{H}_{\text{Ar}}$ ), 3.99 (s, 3H;  $\text{CH}_3$ ), 2.55 (s, 3H;  $\text{CH}_3$ ), 2.25 (s, 3H;  $\text{CH}_3$ );  $^{13}\text{C NMR}$  (101 MHz,  $\text{CDCl}_3$ )  $\delta$  155.48 ( $\text{C}_{\text{Ar}}$ ), 144.82 ( $\text{C}_{\text{Ar}}$ ), 139.71 ( $\text{C}_{\text{Ar}}$ ), 138.20 ( $\text{C}_{\text{Ar}}$ ), 136.76 ( $\text{C}_{\text{Ar}}$ ), 135.28 ( $\text{C}_{\text{Ar}}$ ), 129.73 ( $\text{C}_{\text{Ar}}$ ), 127.57 ( $\text{C}_{\text{Ar}}$ ), 126.59 ( $\text{C}_{\text{Ar}}$ ), 125.33 ( $\text{C}_{\text{Ar}}$ ), 123.42 ( $\text{C}_{\text{Ar}}$ ), 122.88 ( $\text{C}_{\text{Ar}}$ ), 115.73 ( $\text{C}_{\text{Ar}}$ ), 114.87 ( $\text{C}_{\text{Ar}}$ ), 107.81 ( $\text{C}_{\text{Ar}}$ ), 105.12 ( $\text{C}_{\text{Ar}}$ ), 55.62 ( $\text{CH}_3$ ), 22.39 ( $\text{CH}_3$ ), 21.59 ( $\text{CH}_3$ ); **HRMS (ESI)**  $m/z$  calcd for  $\text{C}_{21}\text{H}_{20}\text{NO}_3\text{S}^+$  ( $\text{M}+\text{H}$ ) $^+$  366.1158, found 366.1159.

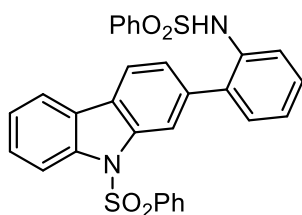

**N-(2-(9-(phenylsulfonyl)-9H-carbazol-2-yl)phenyl)benzenesulfonamide (2da):** yellow solid; Yield 70%, 6h;  $^1\text{H NMR}$  (400 MHz,  $\text{CDCl}_3$ )  $\delta$  8.36 (d,  $J = 8.4$  Hz, 1H;  $\text{H}_{\text{Ar}}$ ), 8.04 (s, 1H;  $\text{H}_{\text{Ar}}$ ), 7.94 (d,  $J = 7.7$  Hz, 1H;  $\text{H}_{\text{Ar}}$ ), 7.85 (dd,  $J = 15.3, 8.0$  Hz, 3H;  $\text{H}_{\text{Ar}}$ ), 7.70 (d,  $J = 8.1$  Hz, 1H;  $\text{H}_{\text{Ar}}$ ), 7.57 (dd,  $J = 16.8, 8.2$  Hz, 4H;  $\text{H}_{\text{Ar}}$ ), 7.50 (t,  $J = 7.2$  Hz, 1H;  $\text{H}_{\text{Ar}}$ ), 7.40 (dt,  $J = 16.5, 8.1$  Hz, 6H;  $\text{H}_{\text{Ar}}$ ), 7.25 – 7.16 (m, 2H;  $\text{H}_{\text{Ar}}$ ), 6.87 (d,  $J = 7.9$  Hz, 1H;  $\text{H}_{\text{Ar}}$ ), 6.72 (s, 1H; NH);  $^{13}\text{C NMR}$  (101 MHz,  $\text{CDCl}_3$ )  $\delta$  139.00 ( $\text{C}_{\text{Ar}}$ ), 138.84 ( $\text{C}_{\text{Ar}}$ ), 138.83 ( $\text{C}_{\text{Ar}}$ ), 137.80 ( $\text{C}_{\text{Ar}}$ ), 136.61 ( $\text{C}_{\text{Ar}}$ ), 134.28 ( $\text{C}_{\text{Ar}}$ ), 134.05 ( $\text{C}_{\text{Ar}}$ ), 133.85 ( $\text{C}_{\text{Ar}}$ ), 133.35 ( $\text{C}_{\text{Ar}}$ ), 130.82 ( $\text{C}_{\text{Ar}}$ ), 129.51 ( $\text{C}_{\text{Ar}}$ ), 129.18 ( $\text{C}_{\text{Ar}}$ ), 129.09 ( $\text{C}_{\text{Ar}}$ ), 128.14 ( $\text{C}_{\text{Ar}}$ ), 127.29 ( $\text{C}_{\text{Ar}}$ ), 126.56 ( $\text{C}_{\text{Ar}}$ ), 126.28 ( $\text{C}_{\text{Ar}}$ ), 125.86 ( $\text{C}_{\text{Ar}}$ ), 125.27 ( $\text{C}_{\text{Ar}}$ ), 124.83 ( $\text{C}_{\text{Ar}}$ ), 124.46 ( $\text{C}_{\text{Ar}}$ ), 121.56 ( $\text{C}_{\text{Ar}}$ ), 120.79 ( $\text{C}_{\text{Ar}}$ ), 120.38 ( $\text{C}_{\text{Ar}}$ ), 115.74 ( $\text{C}_{\text{Ar}}$ ), 115.38 ( $\text{C}_{\text{Ar}}$ ); **HRMS (ESI)**  $m/z$  calcd for  $\text{C}_{30}\text{H}_{23}\text{N}_2\text{O}_4\text{S}_2^+$  ( $\text{M}+\text{H}$ ) $^+$  539.1094, found 539.1091.

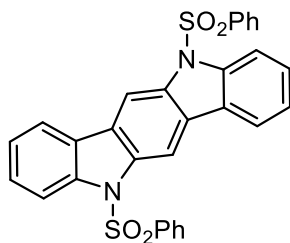

**5,11-Bis(phenylsulfonyl)-5,11-dihydroindolo[3,2-b]carbazole (2da')**: white solid; Yield 80% (with 4.0 equiv **O1**), 12h;  $^1\text{H NMR}$  (400 MHz,  $\text{CDCl}_3$ )  $\delta$  8.83 (s, 2H;  $\text{H}_{\text{Ar}}$ ), 8.34 (d,  $J = 8.4$  Hz, 2H  $\text{H}_{\text{Ar}}$ ), 8.10 (d,  $J = 7.7$  Hz, 2H  $\text{H}_{\text{Ar}}$ ), 7.81 (d,  $J = 8.1$  Hz, 4H  $\text{H}_{\text{Ar}}$ ), 7.58 – 7.48 (m, 3H  $\text{H}_{\text{Ar}}$ ), 7.44 (t,  $J = 7.6$  Hz, 5H  $\text{H}_{\text{Ar}}$ ), 7.30 (d,  $J = 7.7$  Hz, 2H  $\text{H}_{\text{Ar}}$ );  $^{13}\text{C NMR}$  (101 MHz,  $\text{CDCl}_3$ )  $\delta$  139.41 ( $\text{C}_{\text{Ar}}$ ), 137.75 ( $\text{C}_{\text{Ar}}$ ), 135.89 ( $\text{C}_{\text{Ar}}$ ), 134.07 ( $\text{C}_{\text{Ar}}$ ), 129.25 ( $\text{C}_{\text{Ar}}$ ), 128.06 ( $\text{C}_{\text{Ar}}$ ), 127.00 ( $\text{C}_{\text{Ar}}$ ), 126.82 ( $\text{C}_{\text{Ar}}$ ), 126.61 ( $\text{C}_{\text{Ar}}$ ), 124.43 ( $\text{C}_{\text{Ar}}$ ), 120.54 ( $\text{C}_{\text{Ar}}$ ), 115.50 ( $\text{C}_{\text{Ar}}$ ), 106.43 ( $\text{C}_{\text{Ar}}$ ).

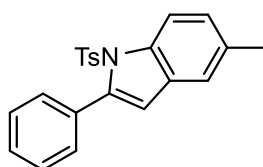

**6-Methyl-2-phenyl-1-tosyl-1H-indole (2ea):** yellow solid; Yield 13%, 12h;  $^1\text{H NMR}$  (400 MHz,  $\text{CDCl}_3$ )  $\delta$  8.13 (s, 1H;  $\text{H}_{\text{Ar}}$ ), 7.50 – 7.44 (m, 2H;  $\text{H}_{\text{Ar}}$ ), 7.41 (d,  $J = 5.2$  Hz, 3H;  $\text{H}_{\text{Ar}}$ ), 7.27 (s, 1H;  $\text{H}_{\text{Ar}}$ ), 7.25 (s, 1H;  $\text{H}_{\text{Ar}}$ ), 7.22 (s, 1H;  $\text{H}_{\text{Ar}}$ ), 7.17 (d,  $J = 8.6$  Hz, 1H;  $\text{H}_{\text{Ar}}$ ), 7.03 (d,  $J = 8.2$  Hz, 2H;  $\text{H}_{\text{Ar}}$ ), 6.49 (s, 1H; CH), 2.53 (s, 3H;  $\text{CH}_3$ ), 2.29 (s, 3H;  $\text{CH}_3$ );  $^{13}\text{C NMR}$  (101 MHz,  $\text{CDCl}_3$ )  $\delta$  144.53 ( $\text{C}_{\text{Ar}}$ ), 142.39 ( $\text{C}_{\text{Ar}}$ ), 136.63 ( $\text{C}_{\text{Ar}}$ ), 134.73 ( $\text{C}_{\text{Ar}}$ ), 134.12 ( $\text{C}_{\text{Ar}}$ ), 132.67 ( $\text{C}_{\text{Ar}}$ ), 130.97 ( $\text{C}_{\text{Ar}}$ ), 130.41 ( $\text{C}_{\text{Ar}}$ ), 129.30 ( $\text{C}_{\text{Ar}}$ ), 128.71 ( $\text{C}_{\text{Ar}}$ ), 127.62 ( $\text{C}_{\text{Ar}}$ ), 126.95 ( $\text{C}_{\text{Ar}}$ ), 126.31 ( $\text{C}_{\text{Ar}}$ ), 120.77 ( $\text{C}_{\text{Ar}}$ ), 116.52 ( $\text{C}_{\text{Ar}}$ ), 113.74 ( $\text{C}_{\text{Ar}}$ ), 100.11 (CH), 21.67 ( $\text{CH}_3$ ), 21.42 ( $\text{CH}_3$ ); **HRMS (ESI)**  $m/z$  calcd for  $\text{C}_{22}\text{H}_{20}\text{NO}_2\text{S}^+$  ( $\text{M}+\text{H}$ ) $^+$  362.1209, found 362.1209.



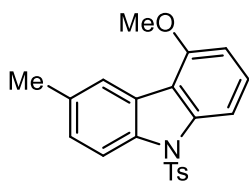

**5-methoxy-3-methyl-9-tosyl-9H-carbazole (2fa):** white solid; Yield 70%, 12h;  $^1\text{H NMR}$  (400 MHz,  $\text{CDCl}_3$ ):  $\delta$  8.10 (d,  $J = 8.4$  Hz, 1H;  $\text{H}_{\text{Ar}}$ ), 7.93–7.90 (m, 1H;  $\text{H}_{\text{Ar}}$ ), 7.84 (dd,  $J = 8.4, 0.6$  Hz, 1H;  $\text{H}_{\text{Ar}}$ ), 7.58 (d,  $J = 8.6$  Hz, 2H;  $\text{H}_{\text{Ar}}$ ), 7.29 (t,  $J = 8.3$  Hz, 1H;  $\text{H}_{\text{Ar}}$ ), 7.20 – 7.14 (m, 1H;  $\text{H}_{\text{Ar}}$ ), 7.04 – 6.91 (m, 2H;  $\text{H}_{\text{Ar}}$ ), 6.71 (d,  $J = 8.2$  Hz, 1H;  $\text{H}_{\text{Ar}}$ ), 3.91 (s, 3H;  $\text{CH}_3$ ), 2.39 (s, 3H;  $\text{CH}_3$ ), 2.14 (s, 3H;  $\text{CH}_3$ );  $^{13}\text{C NMR}$  (101 MHz,  $\text{CDCl}_3$ ):  $\delta$  155.72 ( $\text{C}_{\text{Ar}}$ ), 144.78 ( $\text{C}_{\text{Ar}}$ ), 140.01 ( $\text{C}_{\text{Ar}}$ ), 135.88 ( $\text{C}_{\text{Ar}}$ ), 135.07 ( $\text{C}_{\text{Ar}}$ ), 133.72 ( $\text{C}_{\text{Ar}}$ ), 129.67 ( $\text{C}_{\text{Ar}}$ ), 127.96 ( $\text{C}_{\text{Ar}}$ ), 127.65 ( $\text{C}_{\text{Ar}}$ ), 126.58 ( $\text{C}_{\text{Ar}}$ ), 125.99 ( $\text{C}_{\text{Ar}}$ ), 123.37 ( $\text{C}_{\text{Ar}}$ ), 115.62 ( $\text{C}_{\text{Ar}}$ ), 114.31 ( $\text{C}_{\text{Ar}}$ ), 107.85 ( $\text{C}_{\text{Ar}}$ ), 105.09 ( $\text{C}_{\text{Ar}}$ ), 55.62 ( $\text{CH}_3$ ), 21.57 ( $\text{CH}_3$ ), 21.45 ( $\text{CH}_3$ ). **HRMS (ESI)**  $m/z$  calcd for  $\text{C}_{21}\text{H}_{19}\text{NNaO}_3\text{S}^+$  ( $\text{M}+\text{Na}$ ) $^+$  388.0978, found 388.0978.

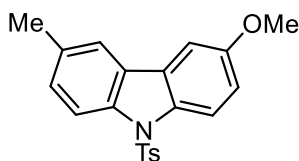

**3-Methoxy-6-methyl-9-tosyl-9H-carbazole (2fb):** white solid; Yield 98%, 12h;  $^1\text{H NMR}$  (400 MHz,  $\text{CDCl}_3$ )  $\delta$  8.18 (dd,  $J = 12.4, 8.8$  Hz, 2H;  $\text{H}_{\text{Ar}}$ ), 7.62 (d,  $J = 8.4$  Hz, 3H;  $\text{H}_{\text{Ar}}$ ), 7.29 (t,  $J = 6.0$  Hz, 2H;  $\text{H}_{\text{Ar}}$ ), 7.05 (dd,  $J = 8.8, 2.8$  Hz, 3H;  $\text{H}_{\text{Ar}}$ ), 3.88 (s, 3H;  $\text{CH}_3$ ), 2.47 (s, 3H;  $\text{CH}_3$ ), 2.24 (s, 3H;  $\text{CH}_3$ );  $^{13}\text{C NMR}$  (101 MHz,  $\text{CDCl}_3$ )  $\delta$  156.95 ( $\text{C}_{\text{Ar}}$ ), 144.70 ( $\text{C}_{\text{Ar}}$ ), 137.37 ( $\text{C}_{\text{Ar}}$ ), 134.88 ( $\text{C}_{\text{Ar}}$ ), 133.69 ( $\text{C}_{\text{Ar}}$ ), 133.15 ( $\text{C}_{\text{Ar}}$ ), 129.64 ( $\text{C}_{\text{Ar}}$ ), 128.77 ( $\text{C}_{\text{Ar}}$ ), 127.76 ( $\text{C}_{\text{Ar}}$ ), 126.90 ( $\text{C}_{\text{Ar}}$ ), 126.59 ( $\text{C}_{\text{Ar}}$ ), 120.14 ( $\text{C}_{\text{Ar}}$ ), 116.47 ( $\text{C}_{\text{Ar}}$ ), 115.38 ( $\text{C}_{\text{Ar}}$ ), 115.25 ( $\text{C}_{\text{Ar}}$ ), 103.26 ( $\text{C}_{\text{Ar}}$ ), 55.87 ( $\text{CH}_3$ ), 21.60 ( $\text{CH}_3$ ), 21.41 ( $\text{CH}_3$ ); **HRMS (ESI)**  $m/z$  calcd for  $\text{C}_{21}\text{H}_{20}\text{NO}_3\text{S}^+$  ( $\text{M}+\text{H}$ ) $^+$  366.1158, found 365.1159.

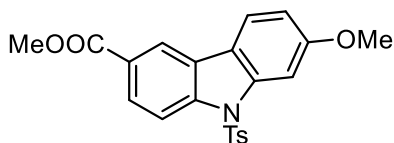

**methyl 7-methoxy-9-tosyl-9H-carbazole-3-carboxylate (2fc):** white solid; Yield 85%, 12h;  $^1\text{H NMR}$  (400 MHz,  $\text{CDCl}_3$ ):  $\delta$  8.48 (d,  $J = 1.7$  Hz, 1H;  $\text{H}_{\text{Ar}}$ ), 8.30 (d,  $J = 8.8$  Hz, 1H;  $\text{H}_{\text{Ar}}$ ), 8.09 (dd,  $J = 8.7, 1.8$  Hz, 1H;  $\text{H}_{\text{Ar}}$ ), 7.87 (d,  $J = 2.3$  Hz, 1H;  $\text{H}_{\text{Ar}}$ ), 7.82 (d,  $J = 8.6$  Hz, 1H;  $\text{H}_{\text{Ar}}$ ), 7.72 – 7.67 (m, 2H;  $\text{H}_{\text{Ar}}$ ), 7.13 (d,  $J = 7.8$  Hz, 2H;  $\text{H}_{\text{Ar}}$ ), 6.99 (dd,  $J = 8.6, 2.3$  Hz, 1H;  $\text{H}_{\text{Ar}}$ ), 3.95 (d,  $J = 1.0$  Hz, 6H;  $\text{CH}_3$ ), 2.28 (s, 3H;  $\text{CH}_3$ );  $^{13}\text{C NMR}$  (101 MHz,  $\text{CDCl}_3$ ):  $\delta$  167.19 ( $\text{C}=\text{O}$ ), 160.41 ( $\text{C}_{\text{Ar}}$ ), 145.45 ( $\text{C}_{\text{Ar}}$ ), 141.30 ( $\text{C}_{\text{Ar}}$ ), 140.41 ( $\text{C}_{\text{Ar}}$ ), 134.94 ( $\text{C}_{\text{Ar}}$ ), 129.97 ( $\text{C}_{\text{Ar}}$ ), 127.53 ( $\text{C}_{\text{Ar}}$ ), 126.63 ( $\text{C}_{\text{Ar}}$ ), 126.01 ( $\text{C}_{\text{Ar}}$ ), 121.19 ( $\text{C}_{\text{Ar}}$ ), 121.09 ( $\text{C}_{\text{Ar}}$ ), 119.27 ( $\text{C}_{\text{Ar}}$ ), 114.70 ( $\text{C}_{\text{Ar}}$ ), 112.63 ( $\text{C}_{\text{Ar}}$ ), 99.99 ( $\text{C}_{\text{Ar}}$ ), 56.01 ( $\text{CH}_3$ ), 52.34 ( $\text{CH}_3$ ), 21.67 ( $\text{CH}_3$ ); **HRMS (ESI)**  $m/z$  calcd for  $\text{C}_{22}\text{H}_{19}\text{NNaO}_5\text{S}^+$  ( $\text{M}+\text{Na}$ ) $^+$  432.0876, found 432.0879.

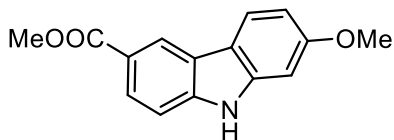

To a solution of **2fc** in THF (0.1 M) was added TBAF (1.0 M solution in THF, 5 equiv) at room temperature. The reaction mixture was refluxed for 3 h. The reaction mixture was poured into water and extracted with  $\text{CH}_2\text{Cl}_2$  (3–5 times), dried over anhydrous  $\text{Na}_2\text{SO}_4$ , and concentrated in vacuo. The residue was purified by flash chromatography on silica gel (PE/EA).

**Clausine C (2fd):** white solid; Yield 80% in two steps;  $^1\text{H NMR}$  (400 MHz,  $\text{DMSO}-d_6$ )  $\delta$  10.73 (s, 1H; NH), 7.81 (d,  $J = 1.8$  Hz, 1H;  $\text{H}_{\text{Ar}}$ ), 7.27 (d,  $J = 8.6$  Hz, 1H;  $\text{H}_{\text{Ar}}$ ), 7.08 (dd,  $J = 8.5, 1.8$  Hz, 1H;  $\text{H}_{\text{Ar}}$ ), 6.65 (d,  $J = 8.6$  Hz, 1H;  $\text{H}_{\text{Ar}}$ ), 6.16 (d,  $J = 2.3$  Hz, 1H;  $\text{H}_{\text{Ar}}$ ), 5.98 (dd,  $J = 8.6, 2.3$  Hz, 1H;  $\text{H}_{\text{Ar}}$ ), 3.02 (s, 3H;  $\text{CH}_3$ ), 3.00 (s, 3H;  $\text{CH}_3$ );  $^{13}\text{C NMR}$  (101 MHz,  $\text{DMSO}-d_6$ )  $\delta$  167.17 ( $\text{C}_{\text{Ar}}$ ), 159.17 ( $\text{C}_{\text{Ar}}$ ), 142.77 ( $\text{C}_{\text{Ar}}$ ), 141.93 ( $\text{C}_{\text{Ar}}$ ), 125.60 ( $\text{C}_{\text{Ar}}$ ), 122.65 ( $\text{C}_{\text{Ar}}$ ), 121.65 ( $\text{C}_{\text{Ar}}$ ), 121.44 ( $\text{C}_{\text{Ar}}$ ), 119.98 ( $\text{C}_{\text{Ar}}$ ), 116.13 ( $\text{C}_{\text{Ar}}$ ), 110.57 ( $\text{C}_{\text{Ar}}$ ), 108.88 ( $\text{C}_{\text{Ar}}$ ), 94.93 ( $\text{C}_{\text{Ar}}$ ), 55.44 ( $\text{CH}_3$ ), 51.85 ( $\text{CH}_3$ ).

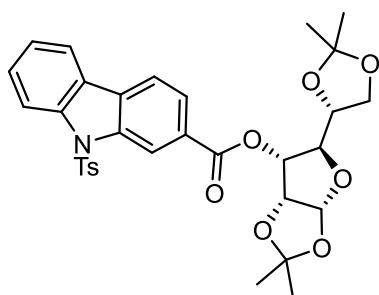

**(3aR,5R,6R,6aR)-5-((R)-2,2-dimethyl-1,3-dioxolan-4-yl)-2,2-dimethyltetrahydrofuro[2,3-d][1,3]dioxol-6-yl 9-tosyl-9H-carbazole-2-carboxylate (2fe):** colorless liquid; Yield 90%, 12h;  $^1\text{H NMR}$  (400 MHz,  $\text{CDCl}_3$ ):  $\delta$  9.00 (d,  $J = 1.6$  Hz, 1H;  $\text{H}_{\text{Ar}}$ ), 8.36 (d,  $J = 8.4$  Hz, 1H;  $\text{H}_{\text{Ar}}$ ), 8.03 (dd,  $J = 8.1, 1.7$  Hz, 1H;  $\text{H}_{\text{Ar}}$ ), 7.97 (d,  $J = 3.7$  Hz, 1H;  $\text{H}_{\text{Ar}}$ ), 7.95 (d,  $J = 4.0$  Hz, 1H;  $\text{H}_{\text{Ar}}$ ), 7.74 – 7.68 (m, 2H;  $\text{H}_{\text{Ar}}$ ), 7.58 (ddd,  $J = 8.7, 7.2, 1.6$  Hz, 1H;  $\text{H}_{\text{Ar}}$ ), 7.41 (t,  $J = 7.5$  Hz, 1H;  $\text{H}_{\text{Ar}}$ ), 7.12 (d,  $J = 8.4$  Hz, 2H;  $\text{H}_{\text{Ar}}$ ), 6.01 (d,  $J = 3.7$  Hz, 1H; CH), 5.54 (d,  $J = 3.1$  Hz, 1H; CH), 4.74 (d,  $J = 3.7$  Hz, 1H; CH), 4.51 (dt,  $J = 7.9, 5.4$  Hz, 1H; CH), 4.39 (dd,  $J = 7.9, 3.1$  Hz, 1H; CH), 4.17 (dd,  $J = 9.2, 5.5$  Hz, 2H;  $\text{CH}_2$ ), 2.27 (s, 3H;  $\text{CH}_3$ ), 1.59 (s, 3H;  $\text{CH}_3$ ), 1.45 (s, 3H;  $\text{CH}_3$ ), 1.35 (s, 3H;  $\text{CH}_3$ ), 1.29 (s, 3H;  $\text{CH}_3$ );  $^{13}\text{C NMR}$  (101 MHz,  $\text{CDCl}_3$ ):  $\delta$  165.43 (CO), 145.40 ( $\text{C}_{\text{Ar}}$ ), 139.79 ( $\text{C}_{\text{Ar}}$ ), 138.06 ( $\text{C}_{\text{Ar}}$ ), 134.90 ( $\text{C}_{\text{Ar}}$ ), 130.67 ( $\text{C}_{\text{Ar}}$ ), 129.97 ( $\text{C}_{\text{Ar}}$ ), 129.06 ( $\text{C}_{\text{Ar}}$ ), 128.38 ( $\text{C}_{\text{Ar}}$ ), 126.71 ( $\text{C}_{\text{Ar}}$ ), 125.33 ( $\text{C}_{\text{Ar}}$ ), 125.25 ( $\text{C}_{\text{Ar}}$ ), 124.36 ( $\text{C}_{\text{Ar}}$ ), 121.02 ( $\text{C}_{\text{Ar}}$ ), 120.02 ( $\text{C}_{\text{Ar}}$ ), 116.90 ( $\text{C}_{\text{Ar}}$ ), 115.38 ( $\text{C}_{\text{Ar}}$ ), 112.52 (C), 109.58 (C), 105.32 (CH), 83.54 (CH), 80.18 (CH), 77.23 (CH), 72.87 (CH), 67.50 ( $\text{CH}_2$ ), 27.03 ( $\text{CH}_3$ ), 26.90 ( $\text{CH}_3$ ), 26.38 ( $\text{CH}_3$ ), 25.37 ( $\text{CH}_3$ ), 21.68 ( $\text{CH}_3$ ); **HRMS (ESI)**  $m/z$  calcd for  $\text{C}_{32}\text{H}_{33}\text{NNaO}_9\text{S}^+$  ( $\text{M}+\text{Na}$ ) $^+$  630.1768, found 630.1763.

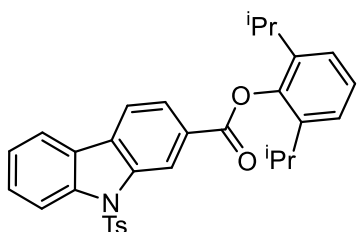

**2,6-Diisopropylphenyl 9-tosyl-9H-carbazole-2-carboxylate (2ff):** white solid; Yield 74%, 12h;  $^1\text{H NMR}$  (400 MHz,  $\text{CDCl}_3$ )  $\delta$  9.23 (s, 1H;  $\text{H}_{\text{Ar}}$ ), 8.43 (d,  $J = 8.4$  Hz, 1H;  $\text{H}_{\text{Ar}}$ ), 8.25 (dd,  $J = 8.1, 1.2$  Hz, 1H;  $\text{H}_{\text{Ar}}$ ), 8.03 (dd,  $J = 13.7, 7.9$  Hz, 2H;  $\text{H}_{\text{Ar}}$ ), 7.77 (d,  $J = 8.3$  Hz, 2H;  $\text{H}_{\text{Ar}}$ ), 7.61 (t,  $J = 7.4$  Hz, 1H;  $\text{H}_{\text{Ar}}$ ), 7.44 (t,  $J = 7.5$  Hz, 1H;  $\text{H}_{\text{Ar}}$ ), 7.34 – 7.21 (m, 3H;  $\text{H}_{\text{Ar}}$ ), 7.13 (d,  $J = 8.2$  Hz, 2H;  $\text{H}_{\text{Ar}}$ ), 3.13 – 2.99 (m, 2H; CH), 2.30 (s, 3H;  $\text{CH}_3$ ), 1.30 (s, 2H;  $\text{CH}_3$ ), 1.27 (dd,  $J = 7.9, 4.3$  Hz, 10H;  $\text{CH}_3$ );  $^{13}\text{C NMR}$  (101 MHz,  $\text{CDCl}_3$ )  $\delta$  165.23 (CO), 146.19 ( $\text{C}_{\text{Ar}}$ ), 145.42 ( $\text{C}_{\text{Ar}}$ ), 140.65 ( $\text{C}_{\text{Ar}}$ ), 139.91 ( $\text{C}_{\text{Ar}}$ ), 138.11 ( $\text{C}_{\text{Ar}}$ ), 135.00 ( $\text{C}_{\text{Ar}}$ ), 130.81 ( $\text{C}_{\text{Ar}}$ ), 129.94 ( $\text{C}_{\text{Ar}}$ ), 129.08 ( $\text{C}_{\text{Ar}}$ ), 128.25 ( $\text{C}_{\text{Ar}}$ ), 126.77 ( $\text{C}_{\text{Ar}}$ ), 125.93 ( $\text{C}_{\text{Ar}}$ ), 125.41 ( $\text{C}_{\text{Ar}}$ ), 124.39 ( $\text{C}_{\text{Ar}}$ ), 124.21 ( $\text{C}_{\text{Ar}}$ ), 121.04 ( $\text{C}_{\text{Ar}}$ ), 120.18 ( $\text{C}_{\text{Ar}}$ ), 117.13 ( $\text{C}_{\text{Ar}}$ ), 115.41 ( $\text{C}_{\text{Ar}}$ ), 114.2 ( $\text{C}_{\text{Ar}}$ ), 27.96 (CH), 24.13 ( $\text{CH}_3$ ), 22.77 ( $\text{CH}_3$ ), 21.70 ( $\text{CH}_3$ ); **HRMS (ESI)**  $m/z$  calcd for  $\text{C}_{32}\text{H}_{31}\text{NO}_4\text{S}^+$  ( $\text{M}+\text{H}$ ) $^+$  526.2047, found 526.2045.

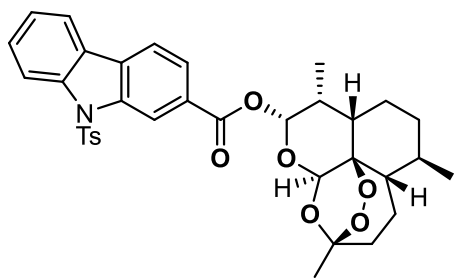

**(3R,5aS,6R,8aS,9R,12R)-3,6,9-trimethyldecahydro-12H-3,12-epoxy[1,2]dioxepino[4,3-i]isochromen-10-yl 9-tosyl-9H-carbazole-2-carboxylate (2fg):** white solid; Yield 90%, 12h;  $^1\text{H NMR}$  (600 MHz,  $\text{CDCl}_3$ )  $\delta$  9.04 (s, 1H;  $\text{H}_{\text{Ar}}$ ), 8.36 (d,  $J = 8.4$  Hz, 1H;  $\text{H}_{\text{Ar}}$ ), 8.12 (d,  $J = 8.1$  Hz, 1H;  $\text{H}_{\text{Ar}}$ ), 7.92 (t,  $J = 8.8$  Hz, 2H;  $\text{H}_{\text{Ar}}$ ), 7.72 (d,  $J = 8.1$  Hz, 2H;  $\text{H}_{\text{Ar}}$ ), 7.55 (t,  $J = 7.8$  Hz, 1H;  $\text{H}_{\text{Ar}}$ ),

7.38 (t,  $J = 7.5$  Hz, 1H;  $\text{H}_{\text{Ar}}$ ), 7.10 (d,  $J = 8.0$  Hz, 2H;  $\text{H}_{\text{Ar}}$ ), 6.05 (d,  $J = 9.8$  Hz, 1H; CH), 5.57 (s, 1H; CH), 2.92 – 2.80 (m, 1H; CH), 2.40 (td,  $J = 14.2, 3.4$  Hz, 1H; CH), 2.24 (s, 3H;  $\text{CH}_3$ ), 2.05 (d,  $J = 14.6$  Hz, 1H; CH), 1.91 (dd,  $J = 8.9, 4.7$  Hz, 1H; CH), 1.84 (d,  $J = 13.1$  Hz, 1H;  $\text{CH}_2$ ), 1.79 – 1.68 (m, 2H;  $\text{CH}_2$ ), 1.56 – 1.46 (m, 2H;  $\text{CH}_2$ ), 1.44 (s, 3H;  $\text{CH}_3$ ), 1.41 – 1.30 (m, 2H;  $\text{CH}_2$ ), 1.09 – 1.03 (m, 1H;  $\text{CH}_2$ ), 0.99 (dd,  $J = 11.0, 6.7$  Hz, 6H;  $\text{CH}_3$ );  $^{13}\text{C NMR}$  (150 MHz,  $\text{CDCl}_3$ )  $\delta$  165.30 (CO), 145.23 ( $\text{C}_{\text{Ar}}$ ), 139.66 ( $\text{C}_{\text{Ar}}$ ), 137.92 ( $\text{C}_{\text{Ar}}$ ), 134.77 ( $\text{C}_{\text{Ar}}$ ), 130.50 ( $\text{C}_{\text{Ar}}$ ), 129.88 ( $\text{C}_{\text{Ar}}$ ), 128.85 ( $\text{C}_{\text{Ar}}$ ), 128.56 ( $\text{C}_{\text{Ar}}$ ), 126.68 ( $\text{C}_{\text{Ar}}$ ), 125.64 ( $\text{C}_{\text{Ar}}$ ), 125.37 ( $\text{C}_{\text{Ar}}$ ), 124.24 ( $\text{C}_{\text{Ar}}$ ), 120.93 ( $\text{C}_{\text{Ar}}$ ), 119.73 ( $\text{C}_{\text{Ar}}$ ), 117.14 ( $\text{C}_{\text{Ar}}$ ), 115.29 ( $\text{C}_{\text{Ar}}$ ), 104.52 (C), 92.91 (CH), 91.74 (CH), 80.31 (C), 51.73 (CH), 45.43 (CH), 37.35 (CH), 36.35 ( $\text{CH}_2$ ), 34.19 (CH), 32.07 ( $\text{CH}_2$ ), 26.09 ( $\text{CH}_3$ ), 24.66 ( $\text{CH}_2$ ), 22.15 ( $\text{CH}_2$ ), 21.59 ( $\text{CH}_3$ ), 20.33 ( $\text{CH}_3$ ), 12.44 ( $\text{CH}_3$ ); **HRMS (ESI)**  $m/z$  calcd for  $\text{C}_{35}\text{H}_{37}\text{NNaO}_8\text{S}^+$  ( $\text{M}+\text{Na}$ ) $^+$  654.2138, found 654.2141.

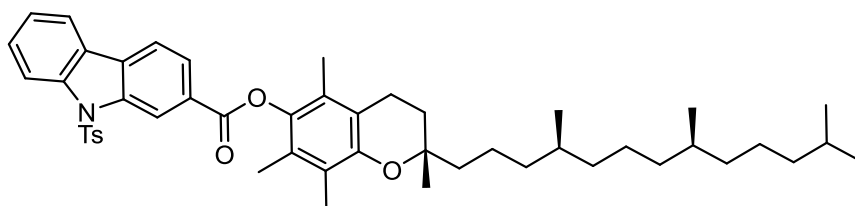

**(R)-2,5,7,8-tetramethyl-2-((4R,8R)-4,8,12-trimethyltridecyl)chroman-6-yl 9-tosyl-9H-carbazole-2-carboxylate (2fh):** white solid; Yield 63%, 12h;  $^1\text{H NMR}$  (400 MHz,  $\text{CDCl}_3$ )  $\delta$  9.21 (d,  $J = 0.8$  Hz, 1H;  $\text{H}_{\text{Ar}}$ ), 8.42 (d,  $J = 8.4$  Hz, 1H;  $\text{H}_{\text{Ar}}$ ), 8.25 (dd,  $J = 8.0, 1.3$  Hz, 1H;  $\text{H}_{\text{Ar}}$ ), 8.01 (t,  $J = 8.4$  Hz, 2H;  $\text{H}_{\text{Ar}}$ ), 7.77 (d,  $J = 8.4$  Hz, 2H;  $\text{H}_{\text{Ar}}$ ), 7.64 – 7.56 (m, 1H;  $\text{H}_{\text{Ar}}$ ), 7.43 (t,  $J = 7.8$  Hz, 1H;  $\text{H}_{\text{Ar}}$ ), 7.13 (d,  $J = 8.0$  Hz, 2H;  $\text{H}_{\text{Ar}}$ ), 2.66 (t,  $J = 6.4$  Hz, 2H;  $\text{CH}_2$ ), 2.29 (s, 3H;  $\text{CH}_3$ ), 2.17 (s, 3H;  $\text{CH}_3$ ), 2.14 (s, 3H;  $\text{CH}_3$ ), 2.09 (s, 3H;  $\text{CH}_3$ ), 1.85 (m, 2H;  $\text{CH}_2$ ), 1.69 – 1.57 (m, 2H;  $\text{CH}_2$ ), 1.56 – 1.48 (m, 2H;  $\text{CH}_2$ ), 1.47 – 1.36 (m, 4H;  $\text{CH}_2$ ), 1.29 (s, 10H;  $\text{CH}_2$ ), 1.19 – 1.07 (m, 6H; CH,  $\text{CH}_3$ ), 0.90 – 0.85 (m, 12H;  $\text{CH}_3$ );  $^{13}\text{C NMR}$  (101 MHz,  $\text{CDCl}_3$ )  $\delta$  165.21 (CO), 149.69 ( $\text{C}_{\text{Ar}}$ ), 145.35 ( $\text{C}_{\text{Ar}}$ ), 140.92 ( $\text{C}_{\text{Ar}}$ ), 139.89 ( $\text{C}_{\text{Ar}}$ ), 138.09 ( $\text{C}_{\text{Ar}}$ ), 135.00 ( $\text{C}_{\text{Ar}}$ ), 130.64 ( $\text{C}_{\text{Ar}}$ ), 129.92 ( $\text{C}_{\text{Ar}}$ ), 128.97 ( $\text{C}_{\text{Ar}}$ ), 128.53 ( $\text{C}_{\text{Ar}}$ ), 127.06 ( $\text{C}_{\text{Ar}}$ ), 126.79 ( $\text{C}_{\text{Ar}}$ ), 125.83 ( $\text{C}_{\text{Ar}}$ ), 125.46 ( $\text{C}_{\text{Ar}}$ ), 125.31 ( $\text{C}_{\text{Ar}}$ ), 124.33 ( $\text{C}_{\text{Ar}}$ ), 123.35 ( $\text{C}_{\text{Ar}}$ ), 120.99 ( $\text{C}_{\text{Ar}}$ ), 120.06 ( $\text{C}_{\text{Ar}}$ ), 117.70 ( $\text{C}_{\text{Ar}}$ ), 117.14 ( $\text{C}_{\text{Ar}}$ ), 115.41 ( $\text{C}_{\text{Ar}}$ ), 75.27 (C), 39.53 ( $\text{CH}_2$ ), 37.74 ( $\text{CH}_2$ ), 37.63 ( $\text{CH}_2$ ), 37.55 ( $\text{CH}_2$ ), 37.45 ( $\text{CH}_2$ ), 32.94 (CH), 32.88 (CH), 28.13 ( $\text{CH}_2$ ), 24.95 ( $\text{CH}_2$ ), 24.61 ( $\text{CH}_3$ ), 22.87 ( $\text{CH}_3$ ), 22.78 ( $\text{CH}_3$ ), 21.67 ( $\text{CH}_3$ ), 20.83 ( $\text{CH}_2$ ), 19.91 ( $\text{CH}_2$ ), 19.86 ( $\text{CH}_3$ ), 19.85 ( $\text{CH}_3$ ), 13.29 ( $\text{CH}_3$ ), 12.45 ( $\text{CH}_3$ ), 12.03 ( $\text{CH}_3$ ); **HRMS (ESI)**  $m/z$  calcd for  $\text{C}_{49}\text{H}_{64}\text{NO}_5\text{S}^+$  ( $\text{M}+\text{H}$ ) $^+$  778.4500, found 778.4504.

## 7. Gram-scale synthesis of *N*-Ts-Carbazole (2a)

A dry round bottom flask equipped with a magnetic stirrer bar was charged with **1a** (1.29 g, 4.00 mmol, 1.0 equiv) and Pd(OAc)<sub>2</sub> (0.40 mmol, 10 mol%) in MeCN (40 mL). **O1** (6.4 mmol, 1.6 equiv) was added, and the reaction mixture was stirred at room temperature under irradiation with blue LEDs (20 W). The reaction mixture was then purified by flash chromatography on silica gel (PE/EA). Yield 95%, 12h.

## 8. Optical and photoperties

### 8.1 Photographs of 2a, 2i, 2j Powders.

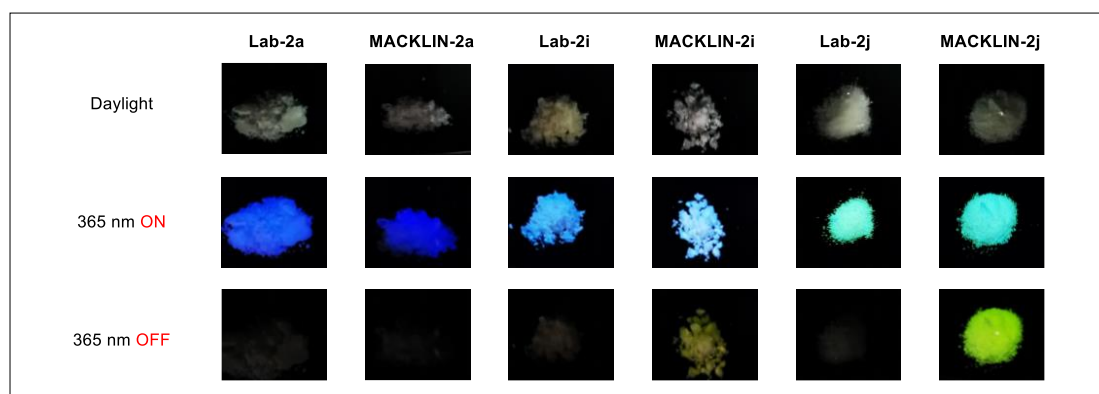

Figure S5. Photographs of **2a**, **2i**, **2j** powders in daylight and under 365 nm irradiation ON/OFF

### 8.2 UV-Vis and fluorescence spectra.

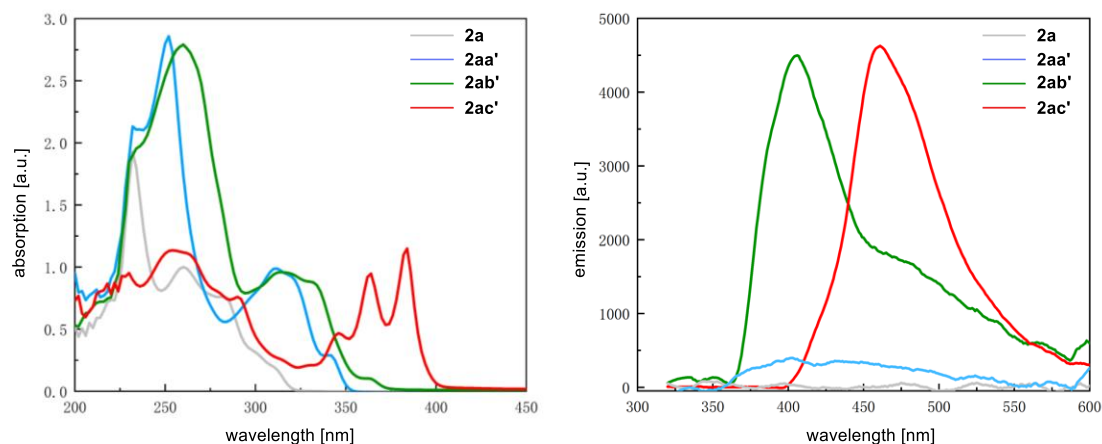

Figure S6. Absorption and emission spectra of selected compounds in CH<sub>2</sub>Cl<sub>2</sub>

### 8.3 Photophysical data

**Table S3.** Photophysical Data of Representative Carbazoles

| Compound    | $\lambda_{\text{max, abs}}^a$ | $\lambda_{\text{max, em}}^b$ | Stokes Shift ( $\text{cm}^{-1}$ ) | $\lambda_{\text{onset, abs}}$ | $E_{\text{g(opt)}} \text{ (eV)}^c$ |
|-------------|-------------------------------|------------------------------|-----------------------------------|-------------------------------|------------------------------------|
| <b>2a</b>   | 232 nm                        | -                            | -                                 | 255 nm                        | 4.86                               |
| <b>2aa'</b> | 252 nm                        | -                            | -                                 | 288 nm                        | 4.31                               |
| <b>2ab'</b> | 260 nm                        | 403 nm                       | 13648                             | 303 nm                        | 4.09                               |
| <b>2ac'</b> | 384 nm                        | 461 nm                       | 4350                              | 402 nm                        | 3.09                               |

<sup>a</sup>Maximum of the longest absorption wavelength. <sup>b</sup>Maximum of the shortest emission wavelength.

<sup>c</sup>Optical gap estimated from  $\lambda_{\text{onset, abs}}$ :  $E_{\text{g(opt)}} = 1239.8/\lambda_{\text{onset, abs}}$ .

## 9. Green chemistry metrics analysis

**Table S4. *E*-Factor, AE, RME, PMI, CE and Atom Efficiency for Carbazoles Synthesis (This work).**

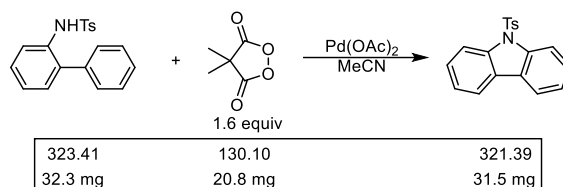

Total amount of reactants: 32.3 mg + 20.8 mg = 53.1 mg

Amount of final product: 31.5 mg

Amount of waste: 53.1 mg - 31.5 mg = 21.6 mg

***E*-Factor** = Amount of waste/Amount of final product = 21.6/31.5 = **0.69**

Molecular weight of product: 321.39

Sum of molecular weight of reagent: 323.41 + 130.10 × 1.6 = 531.57

**Atom economy** = Molecular weight of product/Sum of molecular weight of reagent = 321.39/531.57 = **60.5%**

Mass of product: 31.5 mg

Total Mass of reagent: 32.3 mg + 20.8 mg = 53.1 mg

**RME** = Mass of product/Total Mass of reagent = 31.5/53.1 = **59.3%**

Total Mass in process: 32.3 mg + 20.8 mg = 53.1 mg

Mass of product: 31.5 mg

**PMI** = Total Mass in process/Mass of product = 53.1/31.5 = **1.69**

Amount of carbon in desired product: 19

Total amount of carbon presenten in all reactants: 19 + 5 × 1.6 = 27

**Carbon Efficiency (%)** =  $\frac{\text{Amount of carbon in desired product}}{\text{Total amount of carbon presenten in all reactants}} \times 100\% = 70.4\%$

Yield of product: 98%

Atom economy: 60.5%

**Atom Efficiency (%)** = (% Yield of product × % Atom economy) × 100% = **59.3%**

**Table S5. *E*-Factor, AE, RME, PMI, CE and Atom Efficiency for Carbazoles Synthesis Using Oxone as Oxidant.<sup>2</sup>**

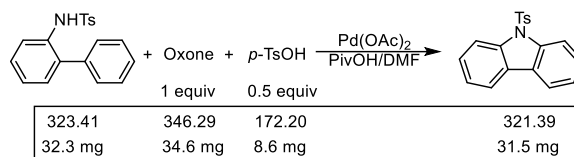

Total amount of reactants: 32.3 mg + 34.6 mg + 8.6 mg = 75.5 mg

Amount of final product: 31.5 mg

Amount of waste: 75.5 mg - 31.5 mg = 44 mg

***E*-Factor** = Amount of waste/Amount of final product = 44/31.5 = **1.40**

Molecular weight of product: 321.39

Sum of molecular weight of reagent: 323.41 + 346.29 + 172.2 × 0.5 = 755.8

**Atom economy** = Molecular weight of product/Sum of molecular weight of reagent = 321.39/755.8 = **42.5%**

Mass of product: 31.5 mg

Total Mass of reagent: 32.3 mg + 34.6 mg + 8.6 mg = 75.5 mg

**RME** = Mass of product/Total Mass of reagent = 31.5/75.5 = **41.7%**

Total Mass in process: 32.3 mg + 34.6 mg + 8.6 mg = 75.5 mg

Mass of product: 31.5 mg

**PMI** = Total Mass in process/Mass of product = 75.5/31.5 = **2.40**

Amount of carbon in desired product: 19

Total amount of carbon present in all reactants: 19 + 7 × 0.5 = 22.5

**Carbon Efficiency (%)** =  $\frac{\text{Amount of carbon in desired product}}{\text{Total amount of carbon present in all reactants}} \times 100\% = 84.4\%$

Yield of product: 98%

Atom economy: 42.5%

**Atom Efficiency (%)** = (% Yield of product × % Atom economy) × 100% = **41.7%**

**Table S6. E-Factor, AE, RME, PMI, CE and Atom Efficiency for Carbazoles Synthesis Using  $\text{PhI}(\text{OAc})_2$  as Oxidant.<sup>1</sup>**

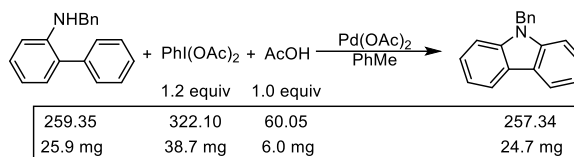

Total amount of reactants: 25.9 mg + 38.7 mg + 6.0 mg = 70.6 mg

Amount of final product: 24.7 mg

Amount of waste: 70.6 mg - 24.7 mg = 45.9 mg

**E-Factor** = Amount of waste/Amount of final product = 45.9/24.7 = **1.86**

Molecular weight of product: 257.34

Sum of molecular weight of reagent: 259.35 + 322.10 × 1.2 + 60.05 × 1.0 = 705.92

**Atom economy** = Molecular weight of product/Sum of molecular weight of reagent = 257.34/705.92 = **36.5%**

Mass of product: 24.7 mg

Total Mass of reagent: 25.9 mg + 38.7 mg + 6.0 mg = 70.6 mg

**RME** = Mass of product/Total Mass of reagent = 24.7/70.6 = **35.0%**

Total Mass in process: 25.9 mg + 38.7 mg + 6.0 mg = 70.6 mg

Mass of product: 24.7 mg

**PMI** = Total Mass in process/Mass of product = 70.6/24.7 = **2.86**

Amount of carbon in desired product: 19

Total amount of carbon present in all reactants: 19 + 10 × 1.2 + 2 × 1.0 = 33

**Carbon Efficiency (%)** =  $\frac{\text{Amount of carbon in desired product}}{\text{Total amount of carbon present in all reactants}} \times 100\% = 57.6\%$

Yield of product: 96%

Atom economy: 36.5%

**Atom Efficiency (%)** = (% Yield of product × % Atom economy) × 100% = **35.1%**



## 10. Mechanistic experiments

### 10.1 Radical inhibition experiments

A dry Schlenk tube equipped with a magnetic stirrer bar was charged with **1a** (0.10 mmol, 1.0 equiv), Pd(OAc)<sub>2</sub> (0.01 mmol, 10 mol%) and additive (0.10 mmol, 1.0 equiv) in MeCN (1 mL). **O1** (0.16 mmol, 1.6 equiv) was added, and the reaction mixture was stirred at room temperature under irradiation with blue LEDs (20 W) for 6 h. The reaction mixture was then purified by flash chromatography on silica gel (PE/EA).

**Table S7:** Effect of Radical Inhibitors<sup>a, b</sup>

| Radical Inhibitors | None | TEMPO | <i>p</i> -benzoquinone | BHT | Hydroquinone | 9,10-Dihydroanthracene | 1,1-Diphenylethylene | 1,4-Dinitrobenzene |
|--------------------|------|-------|------------------------|-----|--------------|------------------------|----------------------|--------------------|
| Yield(%)           | 97   | 60    | 62.5                   | 97  | 96           | 97                     | 96                   | 97                 |

  

|  |  |  |  |  |  |  |  |
|--|--|--|--|--|--|--|--|
|  |  |  |  |  |  |  |  |
|--|--|--|--|--|--|--|--|

<sup>a</sup>Reaction conditions: **1a** (0.10 mmol, 1.0 equiv), additive (0.10 mmol, 1.0 equiv), Pd(OAc)<sub>2</sub> (0.01 mmol, 10 mol%), **O1** (0.16 mmol, 1.6 equiv), MeCN (1 mL), irradiation with blue LEDs for 6 h at room temperature. <sup>b</sup>Isolated yields.

## 10.2 Reaction rate of carbazoles synthesis

**Carbazoles synthesis under blue LEDs:** A dry Schlenk tube equipped with a magnetic stirrer bar was charged with **1a** (0.10 mmol, 1.0 equiv) and Pd(OAc)<sub>2</sub> (0.01 mmol, 10 mol%) in MeCN (1 mL). **O1** (0.16 mmol, 1.6 equiv) was added, and the reaction mixture was stirred at room temperature under irradiation with blue LEDs (20 W). Aliquots (50  $\mu$ l) were taken out by syringe at every 30 minutes and immediately quenched by Na<sub>2</sub>S<sub>2</sub>O<sub>3</sub>, diluted with EA (1 mL) and immediately tested by GC using naphthalene as an internal standard and the results were presented in Figure S7.

**Carbazoles synthesis in the dark:** A dry Schlenk tube equipped with a magnetic stirrer bar was charged with **1a** (0.10 mmol, 1.0 equiv) and Pd(OAc)<sub>2</sub> (0.01 mmol, 10 mol%) in MeCN (1 mL). **O1** (0.16 mmol, 1.6 equiv) was added, and the reaction mixture was stirred at room temperature in the dark. Aliquots (50  $\mu$ l) were taken out by syringe at every 30 minutes and immediately quenched by Na<sub>2</sub>S<sub>2</sub>O<sub>3</sub>, diluted with EA (1 mL) and immediately tested by GC using naphthalene as an internal standard and the results were presented in Figure S7.

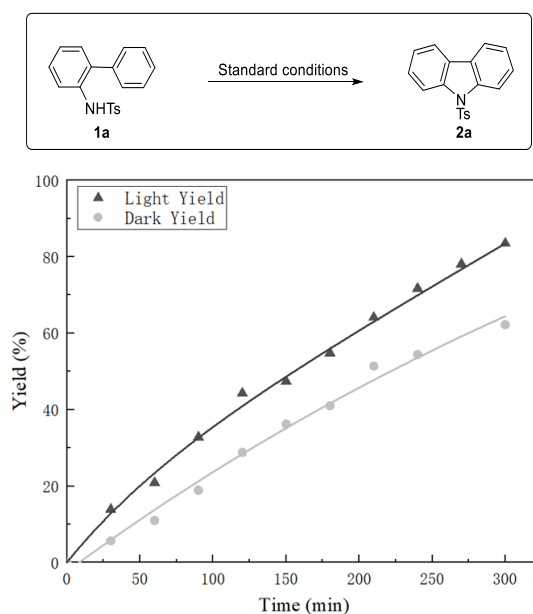

**Figure S7.** Reactivity comparison between blue LEDs and dark

### 10.3 Light On/Off experiment

A dry Schlenk tube equipped with a magnetic stirrer bar was charged with **1a** (0.10 mmol, 1.0 equiv) and Pd(OAc)<sub>2</sub> (0.01 mmol, 10 mol%) in MeCN (1 mL). **O1** (0.16 mmol, 1.6 equiv) was added, and the reaction mixture was stirred alternately in the dark and irradiation with blue LEDs (20 W) at room temperature. Aliquots (50 μl) were taken out by syringe at every 30 minutes and immediately quenched by Na<sub>2</sub>S<sub>2</sub>O<sub>3</sub>, diluted with EA (1 mL). Product yield was tested by GC using naphthalene as an internal standard and the results were presented in Figure S8.

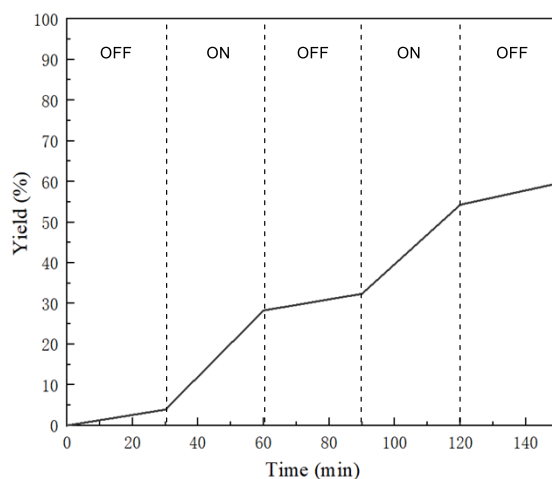

Figure S8. Light on/off experiment

### 10.4 Screening of light source

A dry Schlenk tube equipped with a magnetic stirrer bar was charged with **1a** (0.10 mmol, 1.0 equiv) and Pd(OAc)<sub>2</sub> (0.01 mmol, 10 mol%) in MeCN (1 mL). **O1** (0.16 mmol, 1.6 equiv) was added, and the reaction mixture was stirred at room temperature under irradiation with green or red LEDs (20 W) for 12 h. The reaction mixture was then purified by flash chromatography on silica gel (PE/EA).

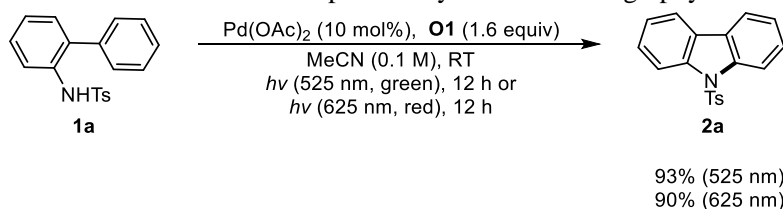

## 10.5 Investigation in palladium(II) 2,2-dimethylmalonate

A Soxhlet set up was charged with solid sodium carbonate (approx. 2 g), in which the dry round bottom flask equipped with a magnetic stirrer bar was charged with a solution of palladium(II) acetate (2.0 mmol) and dimethylmalonic acid (1 mmol) in toluene (30 mL). The reaction mixture was heated at reflux for 3 h, such that the solvent condensed through the solid sodium carbonate before returning to the round bottomed flask. The reaction mixture was allowed to cool to ambient temperature and concentrated under reduced pressure. Acetone (6 mL) was added to the residue and the suspension stirred for 10 minutes at ambient temperature. The precipitate was filtered and dried under vacuum to provide desired product.<sup>9</sup>

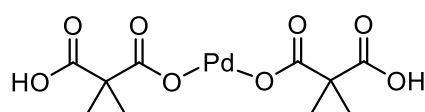

With 2 mmol dimethylmalonic acid. **bis((2-carboxy-2-methylpropanoyl)oxy)palladium**: yellow solid;  $^1\text{H NMR}$  (400 MHz,  $\text{DMSO-}d_6$ )  $\delta$  12.56 (s, 2H), 3.34 (s, 12H).

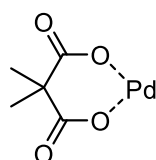

**palladium(II) 2,2-dimethylmalonate**: brown yellow solid;  $^1\text{H NMR}$  (400 MHz,  $\text{DMSO-}d_6$ )  $\delta$  3.49 (s, 6H).

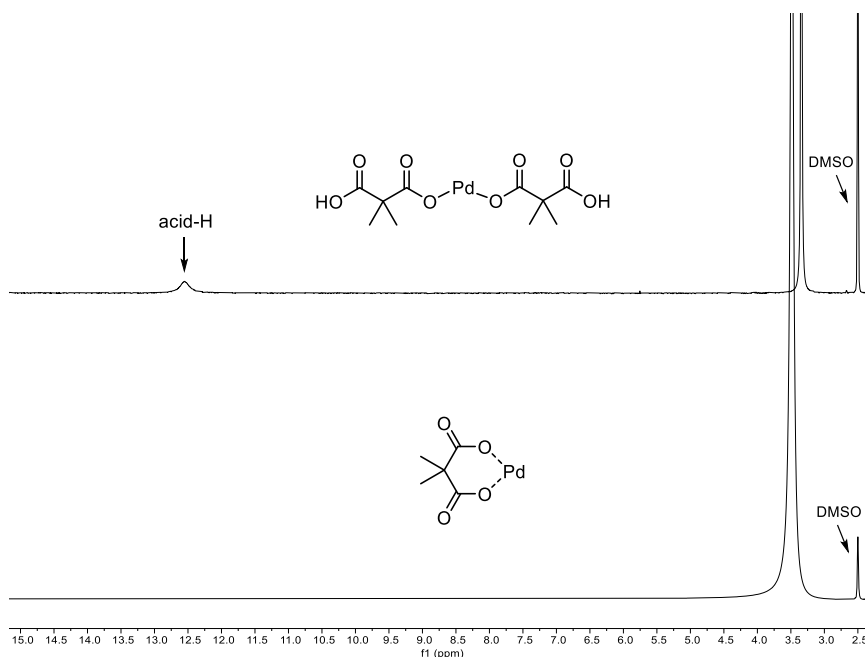

**Figure S9.** Comparison of two palladium compounds

A dry Schlenk tube equipped with a magnetic stirrer bar was charged with **1a** (0.10 mmol, 1.0 equiv) and palladium(II) 2,2-dimethylmalonate (0.01 mmol, 10 mol%) in MeCN (1 mL). **O1** (0.16 mmol, 1.6 equiv) was added, and the mixture was stirred at room temperature under irradiation with blue LEDs (20 W) for 6 h. The reaction mixture was then purified by flash chromatography on silica gel (PE/EA).

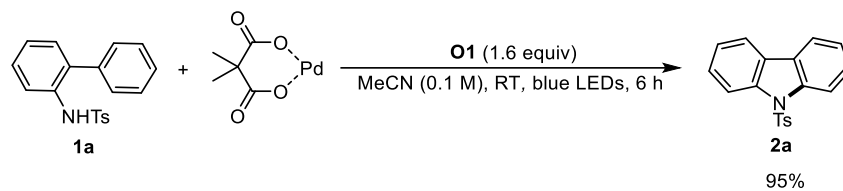

## 10.6 2,2-Dimethylmalonic acid identified by NMR spectra

A dry Schlenk tube equipped with a magnetic stirrer bar was charged with **1a** (4 mmol, 1.0 equiv) and Pd(OAc)<sub>2</sub> (0.4 mmol, 10 mol%) in MeCN (40 mL). **O1** (6.4 mmol, 1.6 equiv) was added, and the reaction mixture was stirred at room temperature under irradiation with blue LEDs (20 W) for 6 h. Next, an aqueous NaOH (10 mL, 1 M) and EA (20 mL) was added. The layers were separated, and the aqueous layer was extracted with EA (15 mL × 2). The combined aqueous layers were acidified by aqueous HCl until PH < 2 and extracted with EA (15 mL × 2). The combined organic layers were washed with brine, dried over anhydrous Na<sub>2</sub>SO<sub>4</sub>, filtered, and concentrated. The residue was detected by NMR spectra.

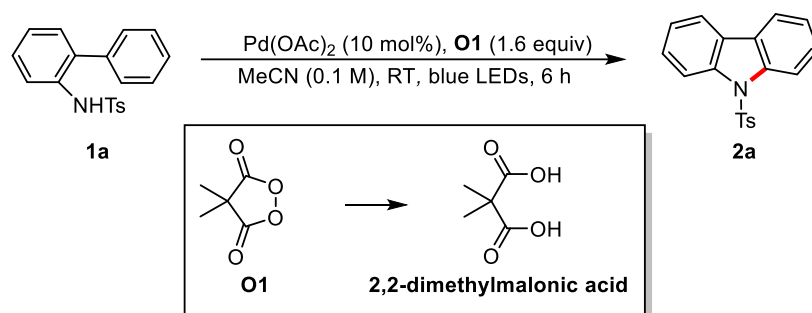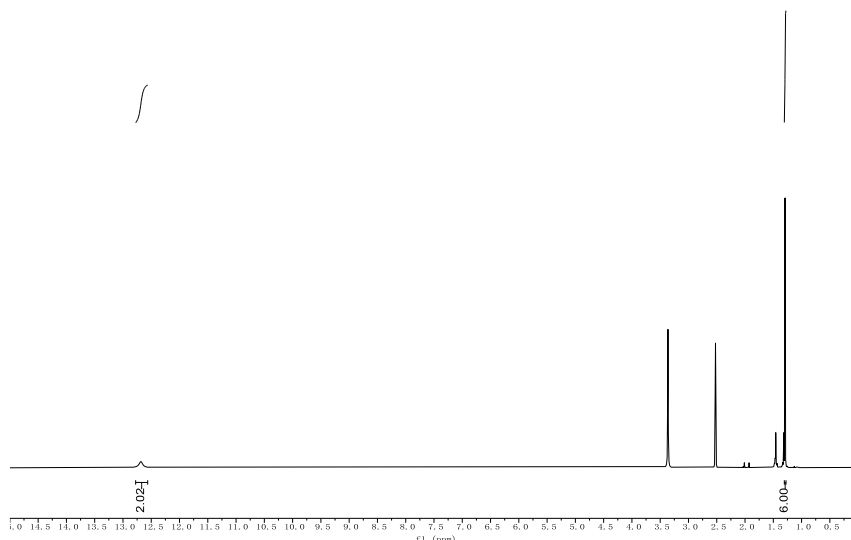

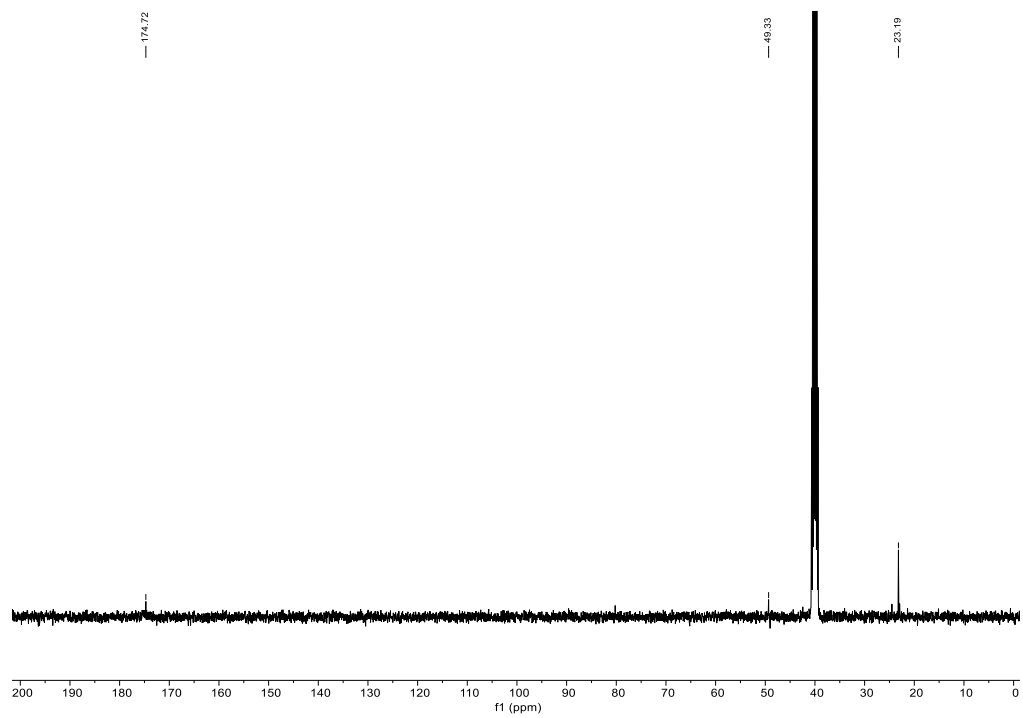

## 10.7 Competition experiments of *meta*-substituted *N*-Ts-2-Phenylanilines

A dry Schlenk tube equipped with a magnetic stirrer bar was charged with two substrates (0.20 mmol, 1:1) and Pd(OAc)<sub>2</sub> (0.01 mmol) in MeCN (1 mL). **O1** (0.16 mmol) was added, and the reaction mixture was stirred at room temperature under irradiation with blue LEDs (20 W) for 6 h. The reaction mixture was then purified by flash chromatography on silica gel (PE/EA).

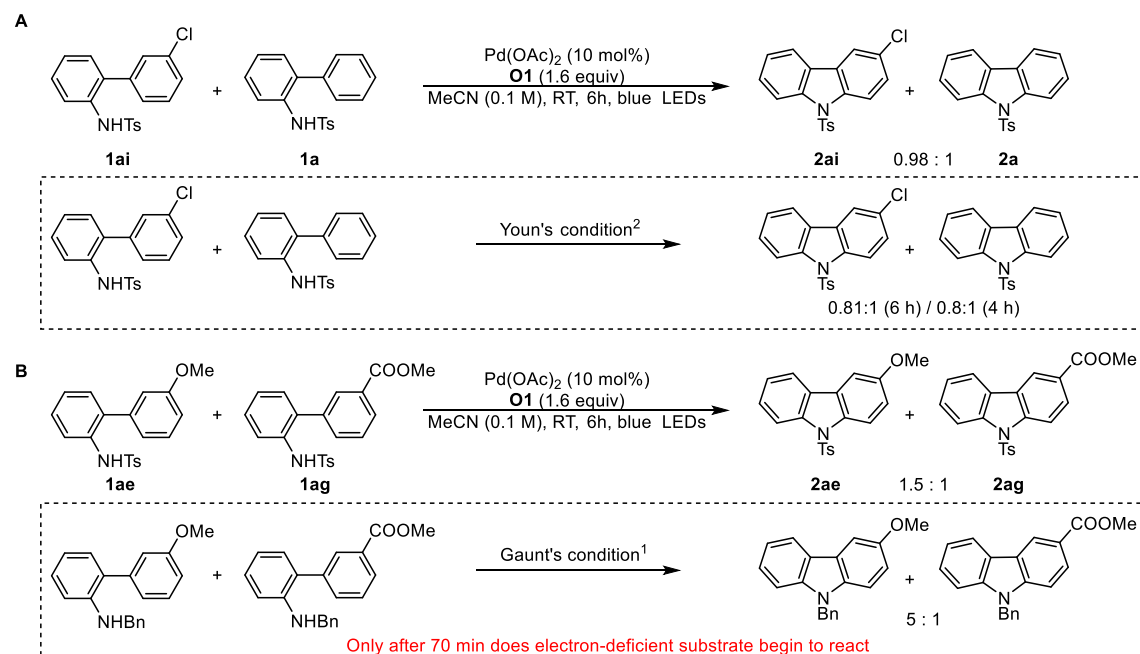

**Figure S10.** Two competition experiments in comparison with the literatures



A dry Schlenk tube equipped with a magnetic stirrer bar was charged with two substrates (0.20 mmol, 1:1) and Pd(OAc)<sub>2</sub> (0.01 mmol) in MeCN (1 mL). **O1** (0.16 mmol) was added, and the reaction mixture was stirred at room temperature under irradiation with blue LEDs (20 W). The mixture was detected by <sup>1</sup>H NMR spectra (*in-situ*).

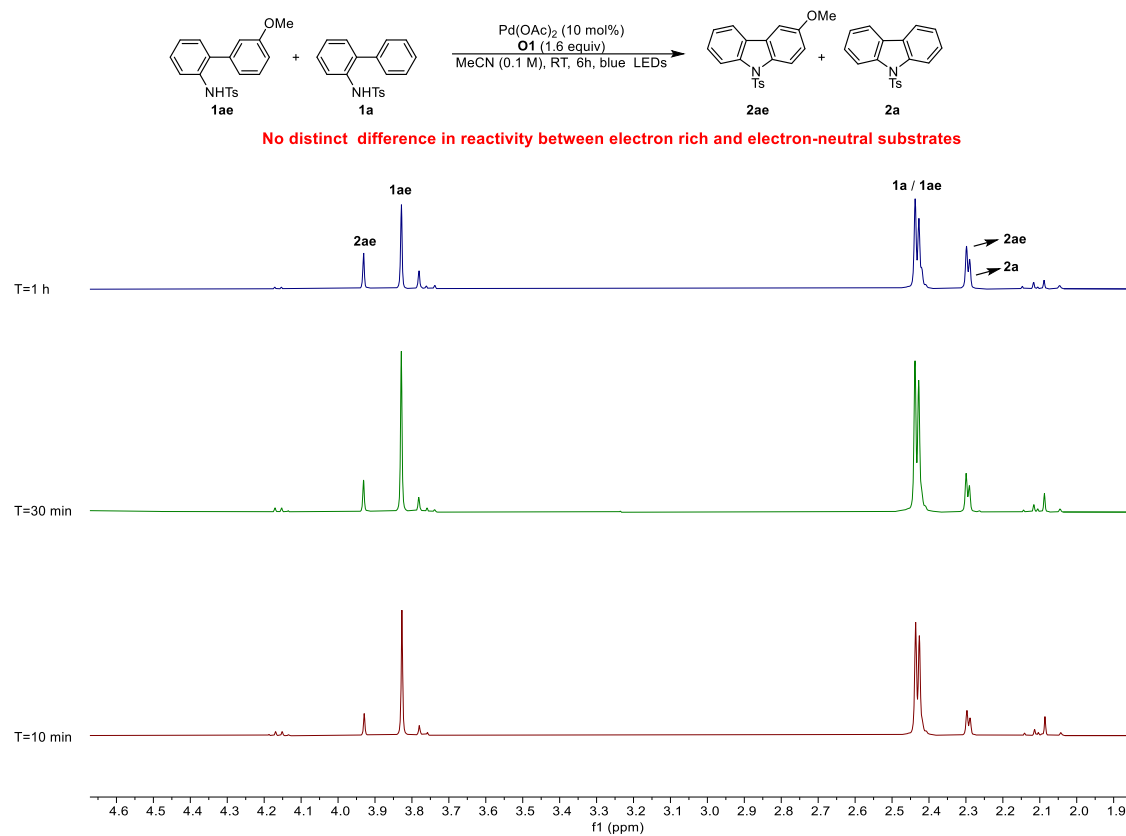

**Figure S11.** Competition experiment between electron rich and electron-neutral substrates

A dry Schlenk tube equipped with a magnetic stirrer bar was charged with two substrates (0.20 mmol, 1:1) and Pd(OAc)<sub>2</sub> (0.01 mmol) in MeCN (1 mL). **O1** (0.16 mmol) was added, and the reaction mixture was stirred at room temperature under irradiation with blue LEDs (20 W). The mixture was detected by <sup>1</sup>H NMR spectra (*in-situ*).

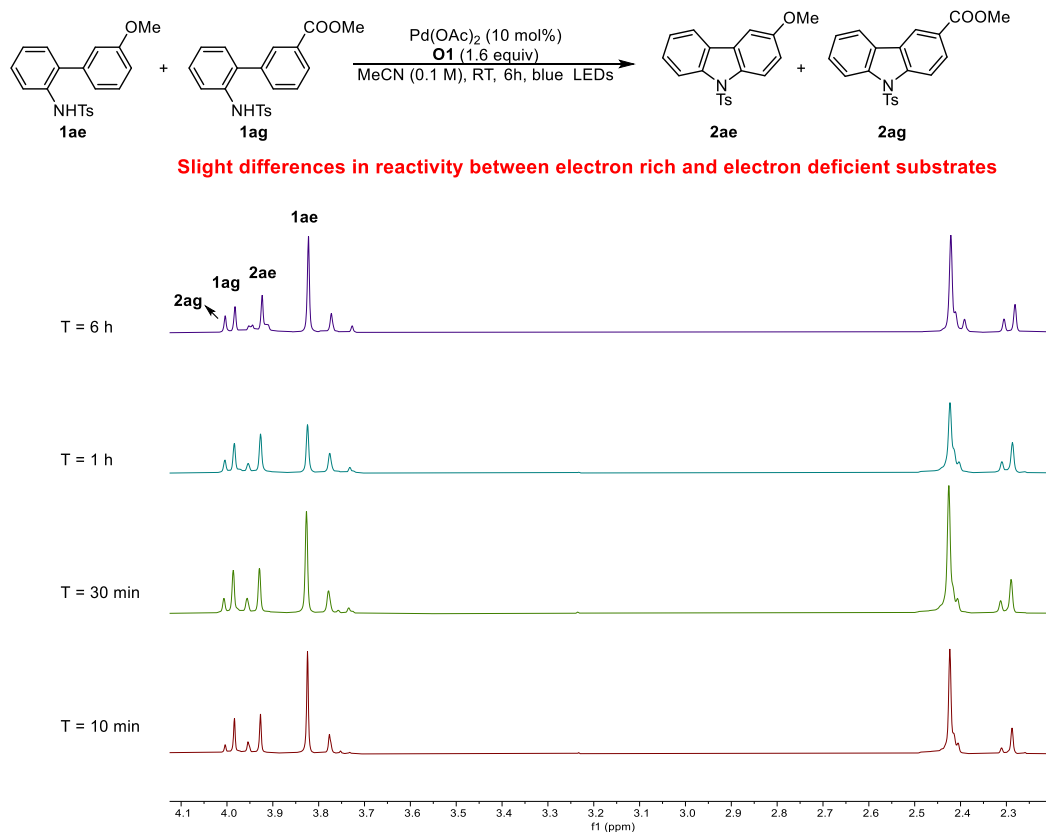

**Figure S12.** Competition experiment between electron rich and electron deficient substrates

## 10.8 Kinetic experiments

**Reaction rate profile:** A dry Schlenk tube equipped with a magnetic stirrer bar was charged with **1a** (0.10 mmol, 1.0 equiv) and Pd(OAc)<sub>2</sub> (0.01 mmol, 10 mol%) in MeCN (1 mL). **O1** (0.16 mmol, 1.6 equiv) was added, and the reaction mixture was stirred at room temperature under irradiation with blue LEDs (20 W). Aliquots (50 μl) were taken out by syringe at every 30 minutes and immediately quenched by Na<sub>2</sub>S<sub>2</sub>O<sub>3</sub>, diluted with EA (1 mL). Product yield was tested by GC using naphthalene as an internal standard and the results were presented in Figure S13.

**Initial rate profile:** A dry Schlenk tube equipped with a magnetic stirrer bar was charged with **1a** (0.10 mmol, 1.0 equiv) and Pd(OAc)<sub>2</sub> (0.01 mmol, 10 mol%) in MeCN (1 mL). **O1** (0.16 mmol, 1.6 equiv) was added, and the reaction mixture was stirred at room temperature under irradiation with blue LEDs (20 W). Aliquots (50 μL) were taken out by syringe at every 5 minutes and immediately quenched by Na<sub>2</sub>S<sub>2</sub>O<sub>3</sub>, diluted with EA (1 mL). Product yield was tested by GC using naphthalene as an internal standard and the results were presented in Figure S13.

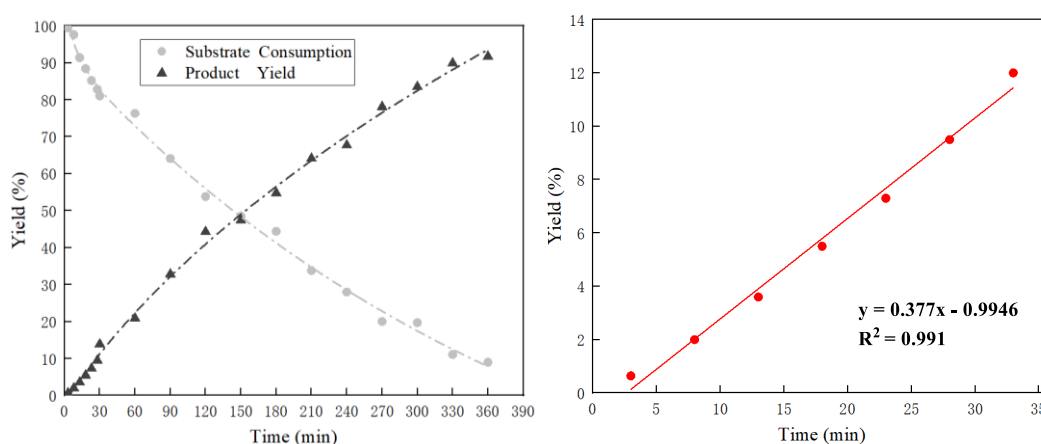

**Figure S13.** Representative time course of the reaction

**Order in catalyst:** A dry Schlenk tube equipped with a magnetic stirrer bar was charged with **1a** (0.10 mmol, 1.0 equiv) and Pd(OAc)<sub>2</sub> (0.004 ~ 0.012 mmol) in MeCN (1 mL). **O1** (0.16 mmol, 1.6 equiv) was added, and the reaction mixture was stirred at room temperature under irradiation with blue LEDs (20 W). Aliquots (50 μL) were taken out by syringe at every 5 minutes and immediately quenched by Na<sub>2</sub>S<sub>2</sub>O<sub>3</sub>, diluted with EA (1 mL). Product yield from the corresponding reaction was tested by GC using naphthalene as an internal standard, and each reported initial rate represents an average of three experiments. The results were presented in Figure S14. A plot of initial rate versus [Pd(OAc)<sub>2</sub>] gave a straight line ( $R^2 = 0.9961$ ), indicating a 1st order dependence on [Pd(OAc)<sub>2</sub>].  $Y = 0.0286 \text{ mM/min} \times X + 0.085$ .

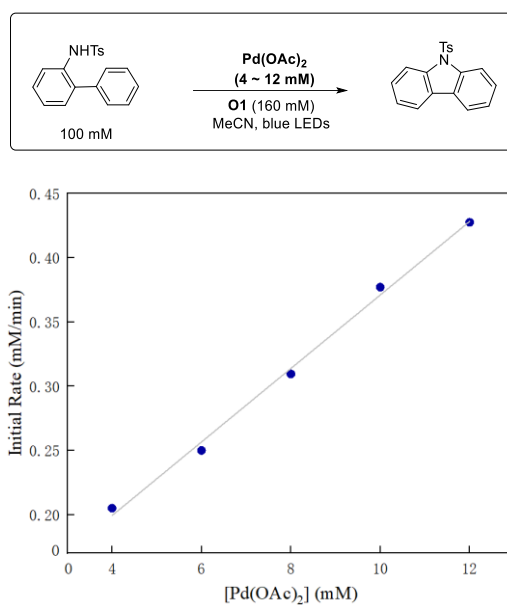

**Figure S14.** Dependence of the initial rate on Pd(OAc)<sub>2</sub>

**Order in substrate:** A dry Schlenk tube equipped with a magnetic stirrer bar was charged with **1a** (0.07 ~ 0.11 mmol) and Pd(OAc)<sub>2</sub> (0.01 mmol, 10 mol%) in MeCN (1 mL). **O1** (0.16 mmol, 1.6 equiv) was added, and the reaction mixture was stirred at room temperature under irradiation with blue LEDs (20 W). Aliquots (1 mL) were taken out by syringe at every 5 minutes and immediately quenched by Na<sub>2</sub>S<sub>2</sub>O<sub>3</sub> (0.5 mL), diluted with EA (1 mL). Product yield from the corresponding reaction was tested by GC using naphthalene as an internal standard, and each reported initial rate represents an average of three experiments. The results were presented in Figure S15. A plot of initial rate versus substrate gave a straight line ( $R^2 = 0.9992$ ), indicating of a 1st order dependence on [substrate].  $Y = 0.00405 \text{ mM/min} \times X - 0.0299$ .

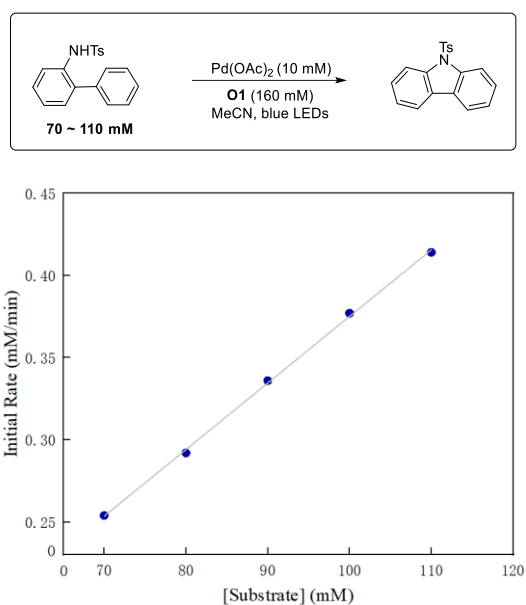

**Figure S15.** Dependence of the initial rate on substrate

**Order in oxidant:** A dry Schlenk tube equipped with a magnetic stirrer bar was charged with **1a** (0.10 mmol, 1.0 equiv) and Pd(OAc)<sub>2</sub> (0.01 mmol, 10 mol%) in MeCN (1 mL). **O1** (0.08 ~ 0.24 mmol) was added, and the reaction mixture was stirred at room temperature under irradiation with blue LEDs (20 W). Aliquots (50 μL) were taken out by syringe at every 5 minutes and immediately quenched by Na<sub>2</sub>S<sub>2</sub>O<sub>3</sub>, diluted with EA (1 mL). Product yield from the corresponding reaction was tested by GC using naphthalene as an internal standard, and each reported initial rate represents an average of three experiments. The results were presented in Figure S16. A plot of initial rate versus substrate gave a flat line, indicating of a zero order dependence on [MPO].  $Y = 0.00004 \text{ mM/min} \times X + 0.367$ .

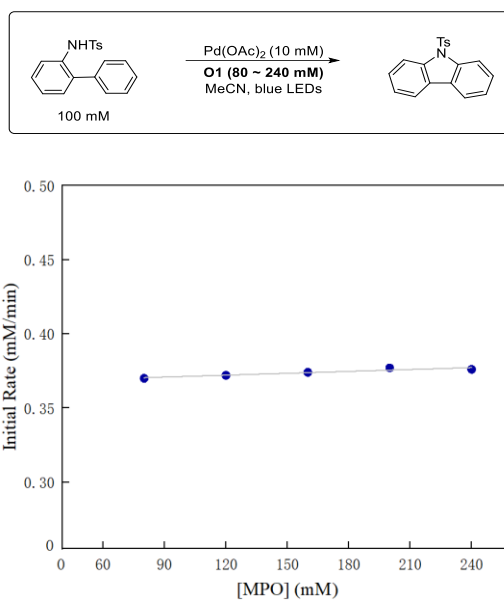

**Figure S16.** Dependence of the initial rate on oxidant

## 10.9 Intermolecular kinetic isotope effect

### Under blue LEDs

A dry round bottom flask flushed with argone and quipped with a magnetic stirrer bar and a septum was charged with arylboronic acid (1.5 equiv),  $K_2CO_3$  (4.0 equiv), and  $Pd(PPh_3)_4$  (10 mol%). A mixture of DME and  $H_2O$  (DME :  $H_2O$  = 1:1, 0.25 M), bromobenzene- $d_5$  (1.0 equiv) were added, and the resulting mixture was heated to 80 °C for 12 hours. The reaction mixture was poured into water and extracted with  $CH_2Cl_2$  (3-5 times), dried over anhydrous  $Na_2SO_4$ , and concentrated under reduced pressure. The residue was purified by column chromatography on silica gel to give the corresponding 2-aminobiphenyl product.

A round bottom flask equipped with a magnetic stirrer bar was charged with the corresponding 2-aminobiphenyl (1.0 equiv) and pyridine (0.2 M) in  $CH_2Cl_2$  (0.2 M). 4-toluenesulfonyl chloride (1.1 equiv) was added at 0 °C. After being stirred at 25 °C for 12 h, the reaction mixture was poured into water and extracted with  $CH_2Cl_2$  (3 times), dried over anhydrous  $Na_2SO_4$ , and concentrated under reduced pressure. The residue was purified by column chromatography on silica gel to give the product **1a- $d_5$** .

A dry Schlenk tube equipped with a magnetic stirrer bar was charged with **1a** (0.05 mmol), **1a-d<sub>5</sub>** (0.05 mmol) and Pd(OAc)<sub>2</sub> (0.01 mmol) in MeCN (1 mL). **O1** (0.10 mmol) was added, and the reaction mixture was stirred at room temperature under irradiation with blue LEDs (20 W) for 6 h. The reaction mixture was then purified by flash chromatography on silica gel (PE/EA). The *KIE* was calculated as 1.33 ± 0.02 based on the average of three kinetics experiments.

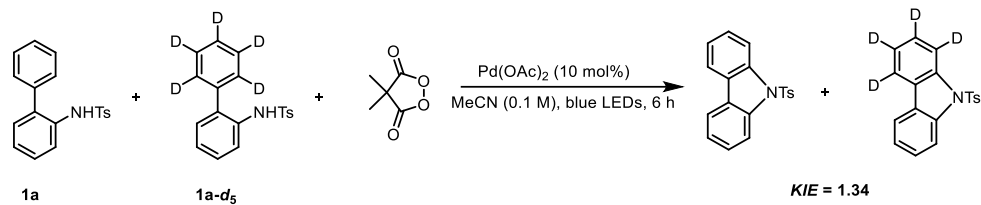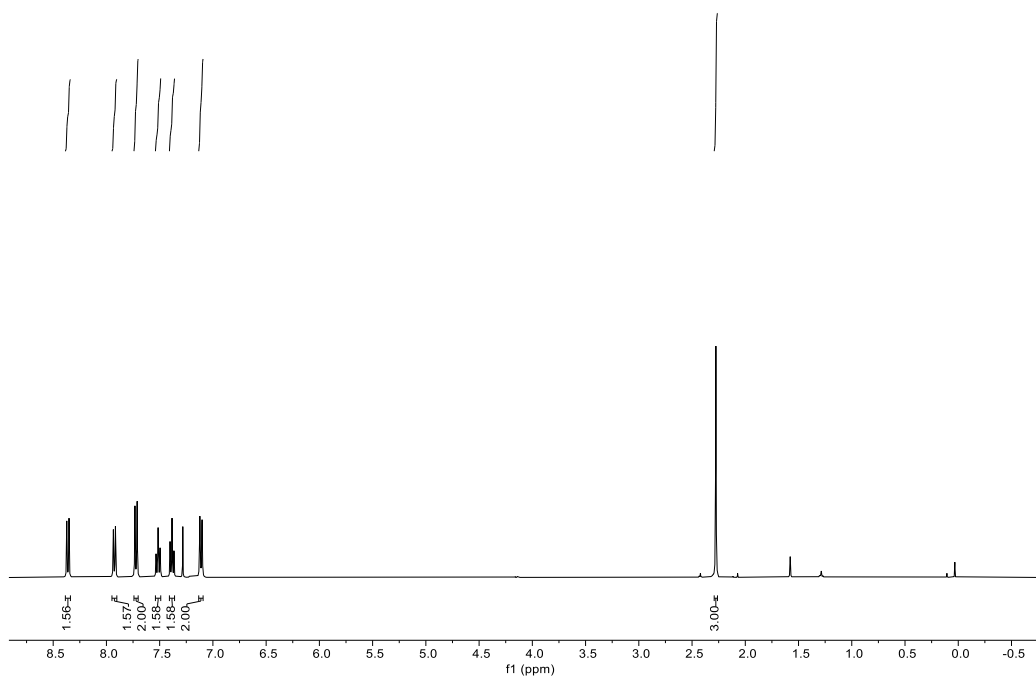



## In the dark

A dry Schlenk tube equipped with a magnetic stirrer bar was charged with **1a** (0.05 mmol), **1a-d<sub>5</sub>** (0.05 mmol) and Pd(OAc)<sub>2</sub> (0.01 mmol) in MeCN (1 mL) **O1** (0.10 mmol) was added, and the reaction mixture was stirred at room temperature in the dark for 6 h. The reaction mixture was then purified by flash chromatography on silica gel (PE/EA). The *KIE* was calculated as  $1.39 \pm 0.02$  based on the average of three kinetics experiments.

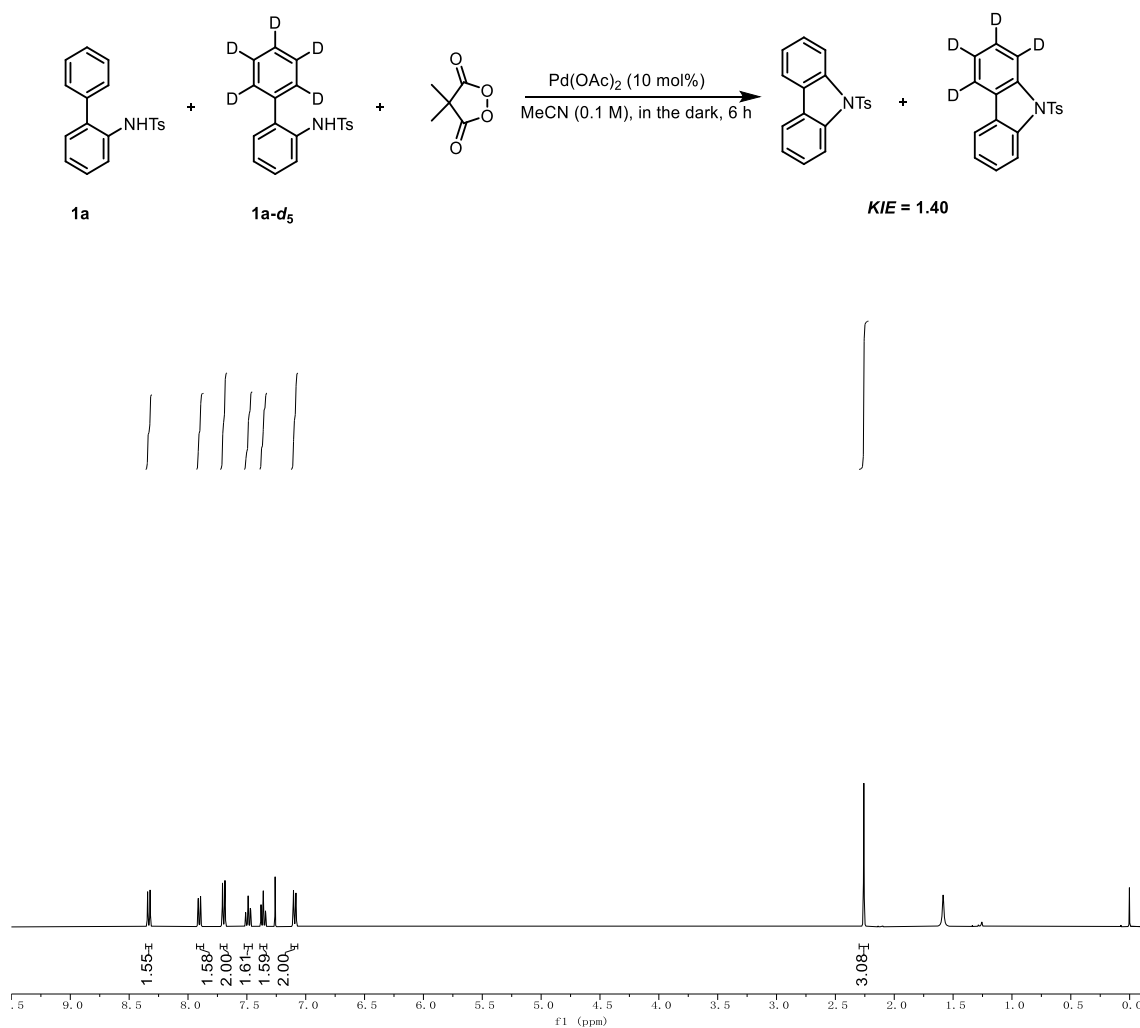

## 10.10 Intramolecular kinetic isotope effect

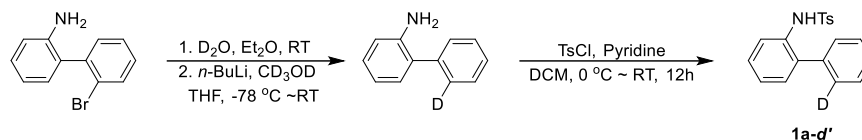

2'-bromobiphenyl-2-amine was dissolved in diethyl ether (25 mL) and washed with D<sub>2</sub>O (3 × 15 mL) to replace most of the amine protons by deuterium. The ethereal solution was dried (anhydrous Na<sub>2</sub>SO<sub>4</sub>) and concentrated. A dry round bottom flask flushed with argon and equipped with a magnetic stirrer bar and a septum was charged with above yellowish liquid (2.5 mmol, 1 equiv.) in dry THF (25 mL). The mixture was cooled to -78 °C and a solution of *n*-BuLi (1.65 M solution in hexane, 6.05 mL, 10 mmol) was added dropwise under vigorous stirring (the color was immediately changed to red). After 1 h at -78 °C, CD<sub>3</sub>OD (3.0 mL) was added, and then quenched with H<sub>2</sub>O (10 mL). The aqueous layer was extracted three times with Et<sub>2</sub>O (10 mL), and the combined organic layers were dried over anhydrous Na<sub>2</sub>SO<sub>4</sub>. The solvent was removed under reduced pressure and 2'-*d*-biphenyl-2-amine was obtained as light yellow oil.<sup>5</sup> The product **1a-d'** was obtained from General procedure A.

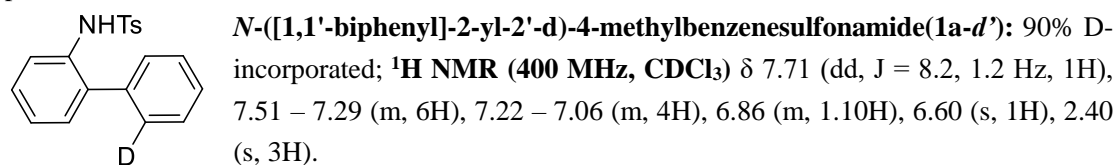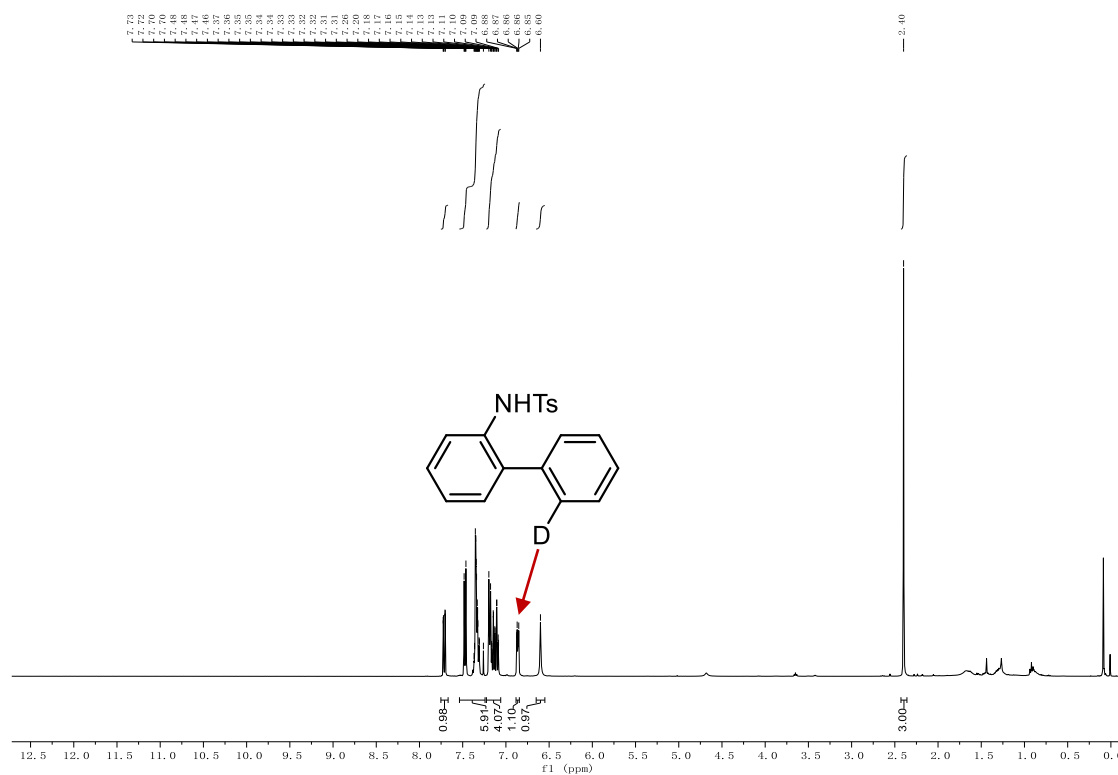

A dry Schlenk tube equipped with a magnetic stirrer bar was charged with **1a-d'** (0.10 mmol, 1.0 equiv) and Pd(OAc)<sub>2</sub> (0.01 mmol, 10 mol%) in MeCN (1 mL). **O1** (0.16 mmol, 1.6 equiv) was added, and the reaction mixture was stirred at room temperature under irradiation with blue LEDs (20 W) for 45 mins. The reaction mixture was then purified by flash chromatography on silica gel (PE/EA). The *KIE* was calculated as 1.92 ± 0.02 based on the average of three kinetics experiments.

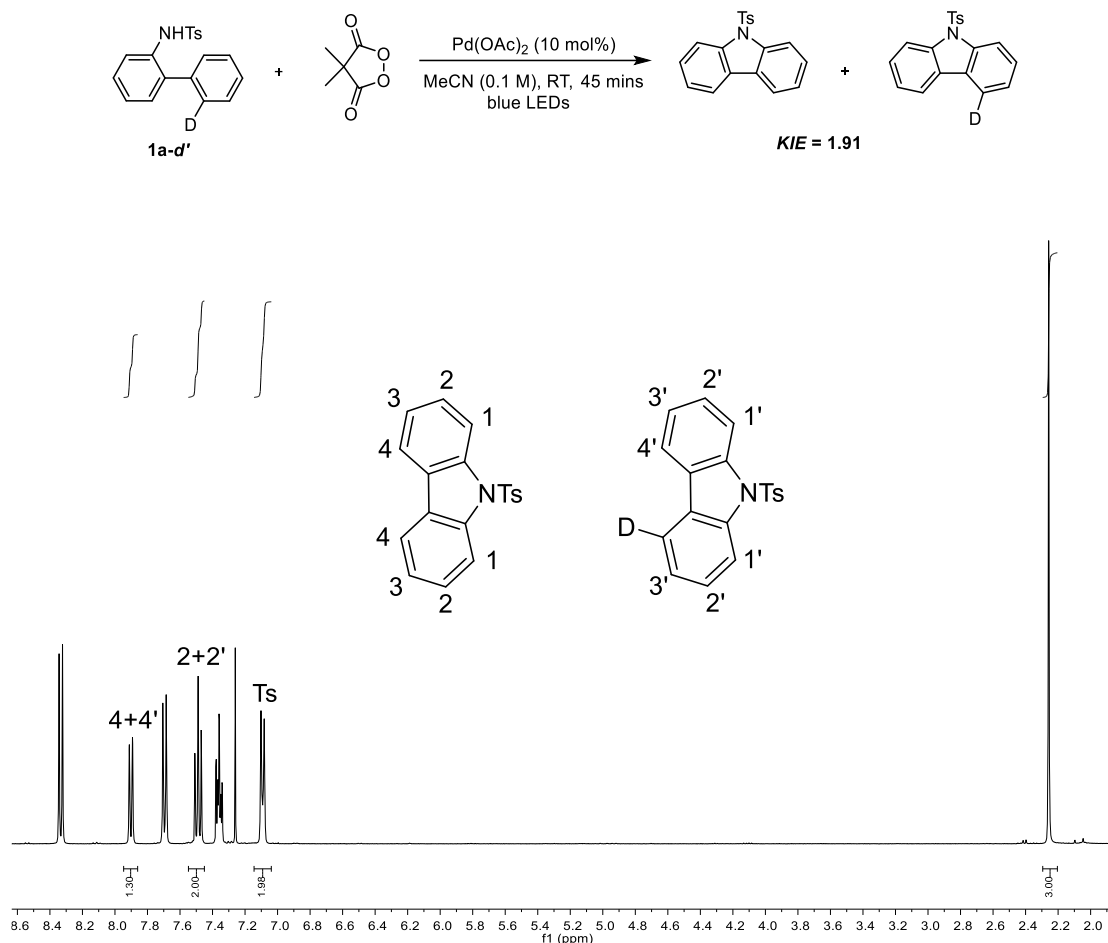

## 10.11 The parallel kinetic isotope effect

A dry round bottom flask flushed with argon and equipped with a magnetic stirrer bar and a septum was charged with **1a** (2.0 mmol, 1 equiv) in dry THF (10 mL). The mixture was cooled to -78 °C and *n*-butyl lithium (1.3 equiv) was added dropwise via syringe. The reaction mixture was stirred for 15 min and D<sub>2</sub>O (6 mL) was added. The resulting mixture was allowed to warm to room temperature and was stirred for another 30 minutes. The mixture was extracted with dry EA (2 × 6 mL) and the combined organic layer was dried with anhydrous Na<sub>2</sub>SO<sub>4</sub> and concentrated in vacuo to give **1a-d**.<sup>10</sup>

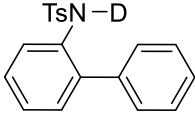 **N-([1,1'-biphenyl]-2-yl)-4-methylbenzenesulfonamide-d (**1a-d**):** white solid; <sup>1</sup>H NMR (400 MHz, CDCl<sub>3</sub>) δ 7.73 (dd, *J* = 8.3, 1.2 Hz, 1H), 7.52 – 7.45 (m, 2H), 7.37 – 7.28 (m, 4H), 7.21 – 7.06 (m, 4H), 6.91 – 6.84 (m, 2H), 2.38 (s, 3H).

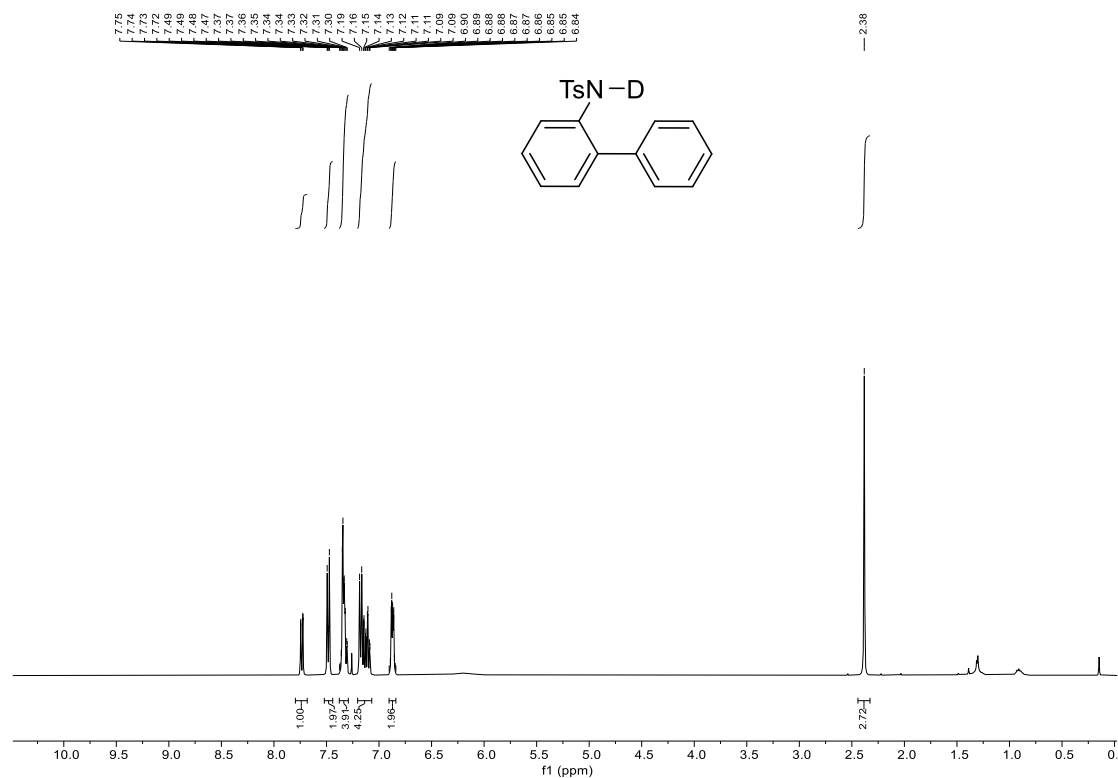

The kinetic isotope effect was determined by studying the initial rate profiles of reactions between two substrates (Figure S17). A dry Schlenk tube equipped with a magnetic stirrer bar was charged with substrate (0.10 mmol, 1.0 equiv) and Pd(OAc)<sub>2</sub> (0.01 mmol, 10 mol%) in MeCN (1 mL). **O1** (0.16 mmol, 1.6 equiv) was added, and the reaction mixture was stirred at room temperature under irradiation with blue LEDs (20 W). Aliquots (50 μL) were taken out by syringe at every 5 minutes and immediately quenched by Na<sub>2</sub>S<sub>2</sub>O<sub>3</sub>, diluted with EA (1 mL). Product yield was tested by GC using naphthalene as an internal standard. The *KIE* was calculated as 0.64.

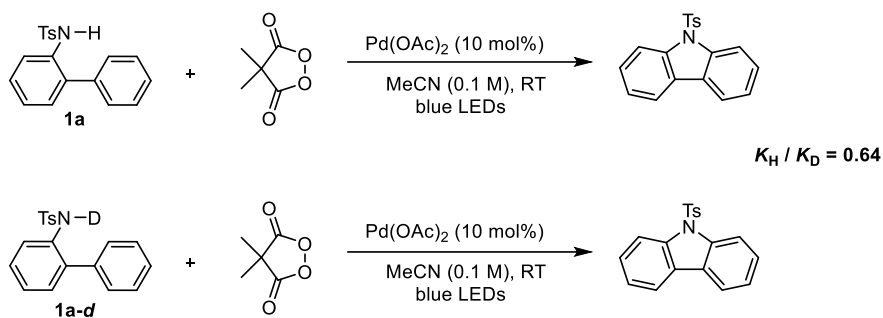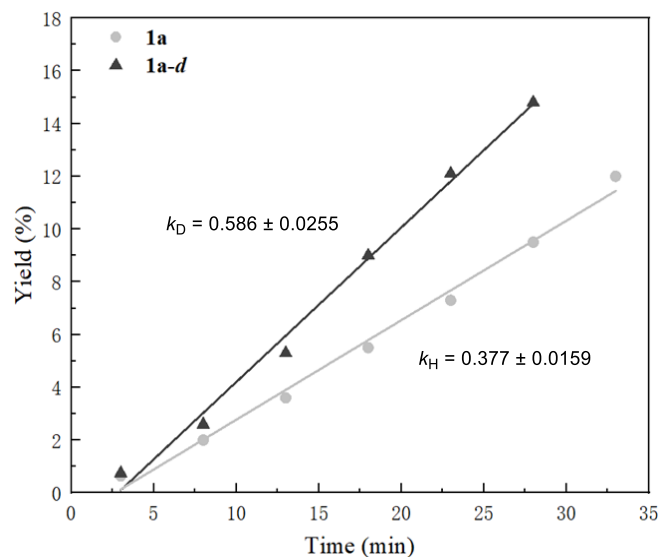

**Figure S17.** The initial rate profiles of reactions.

## 11. References

- (1) J. A. Jordan-Hore, C. C. C. Johansson, M. Gulias, E. M. Beck, M. J. Gaunt, Oxidative Pd(II)-Catalyzed C–H Bond Amination to Carbazole at Ambient Temperature. *J. Am. Chem. Soc.* 2008, **130**, 16184–16186.
- (2) S. W. Youn, J. H. Bihn, B. S. Kim, Pd-Catalyzed Intramolecular Oxidative C–H Amination: Synthesis of Carbazoles. *Org. Lett.* 2011, **13**, 3738–3741.
- (3) S. Choi, T. Chatterjee, W. J. Choi, Y. You, E. J. Cho, Synthesis of Carbazoles by a Merged Visible Light Photoredox and Palladium-Catalyzed Process. *ACS Catal.* 2015, **5**, 4796–4802.
- (4) W. C. P. Tsang, N. Zheng, S. L. Buchwald, Combined C–H Functionalization/C–N Bond Formation Route to Carbazoles. *J. Am. Chem. Soc.* 2005, **127**, 14560–14561.
- (5) S. H. Cho, J. Yoon, S. Chang, Intramolecular Oxidative C–N Bond Formation for the Synthesis of Carbazoles: Comparison of Reactivity between the Copper-Catalyzed and Metal-Free Conditions. *J. Am. Chem. Soc.* 2011, **133**, 5996–6005.
- (6) A. P. Antonchick, R. Samanta, K. Kulikov, J. Lategahn, Organocatalytic, Oxidative, Intramolecular C–H Bond Amination and Metal-free Cross-Amination of Unactivated Arenes at Ambient Temperature. *Angew. Chem., Int. Ed.* 2011, **50**, 8605–8608.
- (7) (a) W. C. P. Tsang, R. H. Munday, G. Brasche, N. Zheng, S. L. Buchwald, Palladium-Catalyzed Method for the Synthesis of Carbazoles via Tandem C–H Functionalization and C–N Bond Formation. *J. Org. Chem.* 2008, **73**, 7603–7610; (b) B. S. Kim, S. Y. Lee, S. W. Youn, Pd-Catalyzed Sequential C–C and C–N Bond Formations for the Synthesis of *N*-Heterocycles: Exploiting Protecting Group-Directed C–H Activation under Modified Reaction Conditions. *Chem. Asian J.* 2011, **6**, 1952–1957; (c) D.-D. Li, T.-T. Yuan, G.-W. Wang, Palladium-Catalyzed *Ortho*-Arylation of Benzamides via Direct sp<sup>2</sup> C–H Bond Activation. *J. Org. Chem.* 2012, **77**, 3341–3347; (d) V. Rajeshkumar, F.-W. Chan, S.-C. Chuang, Palladium-Catalyzed and Hybrid Acids-Assisted Synthesis of [60]Fulleroazepines in One Pot under Mild Conditions: Annulation of *N*-Sulfonyl-2-aminobiaryls with [60]Fullerene through Sequential C–H Bond Activation, C–C and C–N Bond Formation. *Adv. Synth. Catal.* 2012, **354**, 2473–2483; (e) J. Hubrich, T. Himmler, L. Rodefeld, L. Ackermann, Ruthenium(II)-Catalyzed C–H Arylation of Anilides with Boronic Acids, Borinic Acids and Potassium Trifluoroborates. *Adv. Synth. Catal.* 2015, **357**, 474–480; (f) L. Bai, Y. Wang, Y. Ge, J. Liu, X. Luan, Diastereoselective Synthesis of Dibenzob[*b,d*]azepines by Pd(II)-Catalyzed [5 + 2] Annulation of *o*-Arylanilines with Dienes. *Org. Lett.* 2017, **19**, 1734–1737; (g) P.-X. Ling, K. Chen, B.-F. Shi, Palladium-catalyzed interannular *meta*-C–H arylation. *Chem. Commun.* 2017, **53**, 2166–2169; (h) P. Sharma, N. Jain, Chemoselective Synthesis of *N*-arylbenzamides and Benzoyloxyacetanilides from Aryl Isocyanides: Styrene as Aryl and Arylcarboxymethylene Source. *Adv. Synth. Catal.* 2018, **360**, 1932–1937; (i) H. Jiang, K. Li, S. Dong, Z. Chen, G. Yin, Pd(II)/Lewis acid catalyzed oxidative C–H olefination/annulation with dioxygen to construct dihydrophenanthridines and its mechanistic studies. *Tetrahedron* 2023, **138**, 133419.
- (8) Q. Yang, Y. Li, J.-D. Yang, Y. Liu, L. Zhang, S. Luo, J.-P. Cheng, Holistic Prediction of the pK<sub>a</sub> in Diverse Solvents Based on a Machine-Learning Approach. *Angew. Chem., Int. Ed.* 2020, **59**, 19282–19291.
- (9) D. Willcox, B. G. N. Chappell, K. F. Hogg, J. Calleja, A. P. Smalley, M. J. Gaunt, A general catalytic β-C–H carbonylation of aliphatic amines to β-lactams. *Science* 2016, **354**, 851–857.

(10) M. C. Paderes, L. Belding, T. Dudding, J. B. Keister, S. R. Chemler, Evidence for Alkene cis-Aminocupration, an Aminooxygenation Case Study: Kinetics, EPR Spectroscopy, and DFT Calculations. *Chem. Eur. J.* 2012, **18**, 1711–1726.

## 12. Copies of NMR spectra

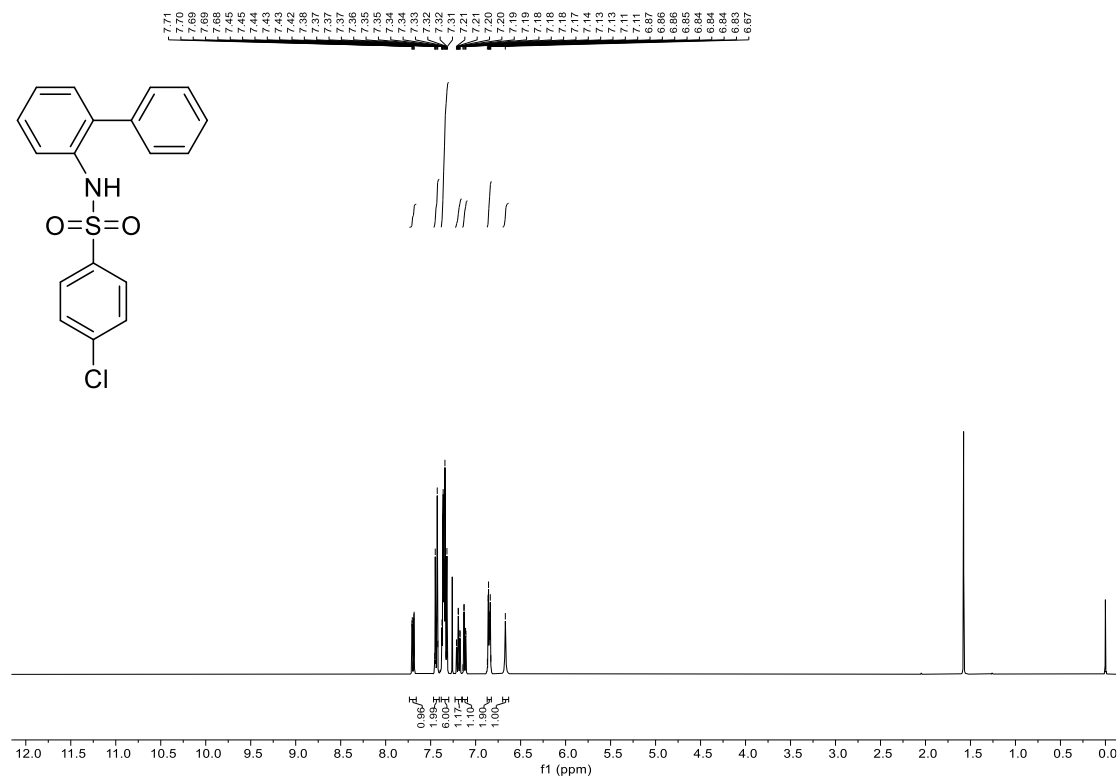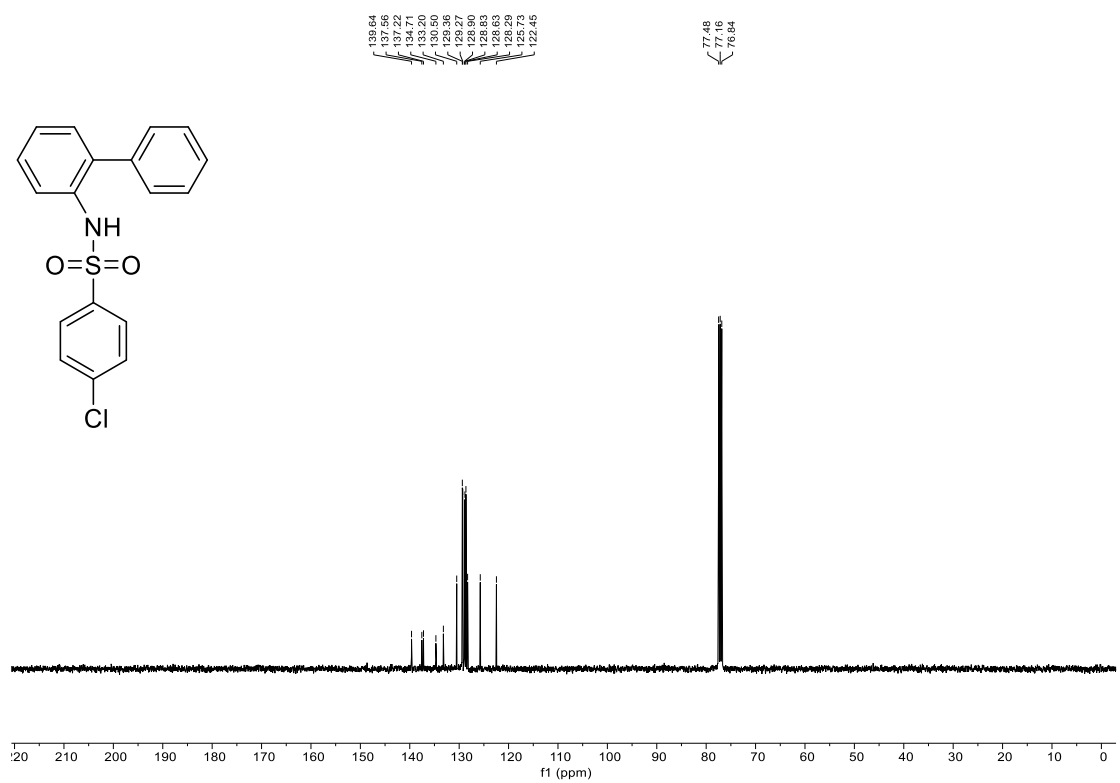



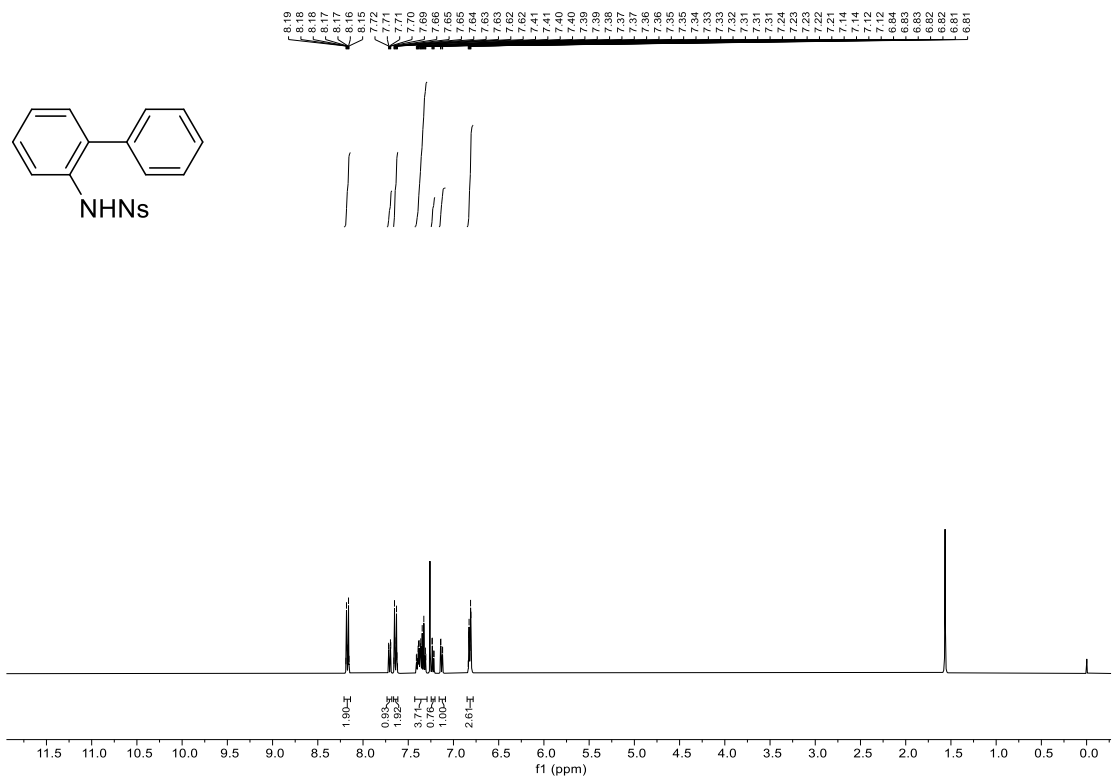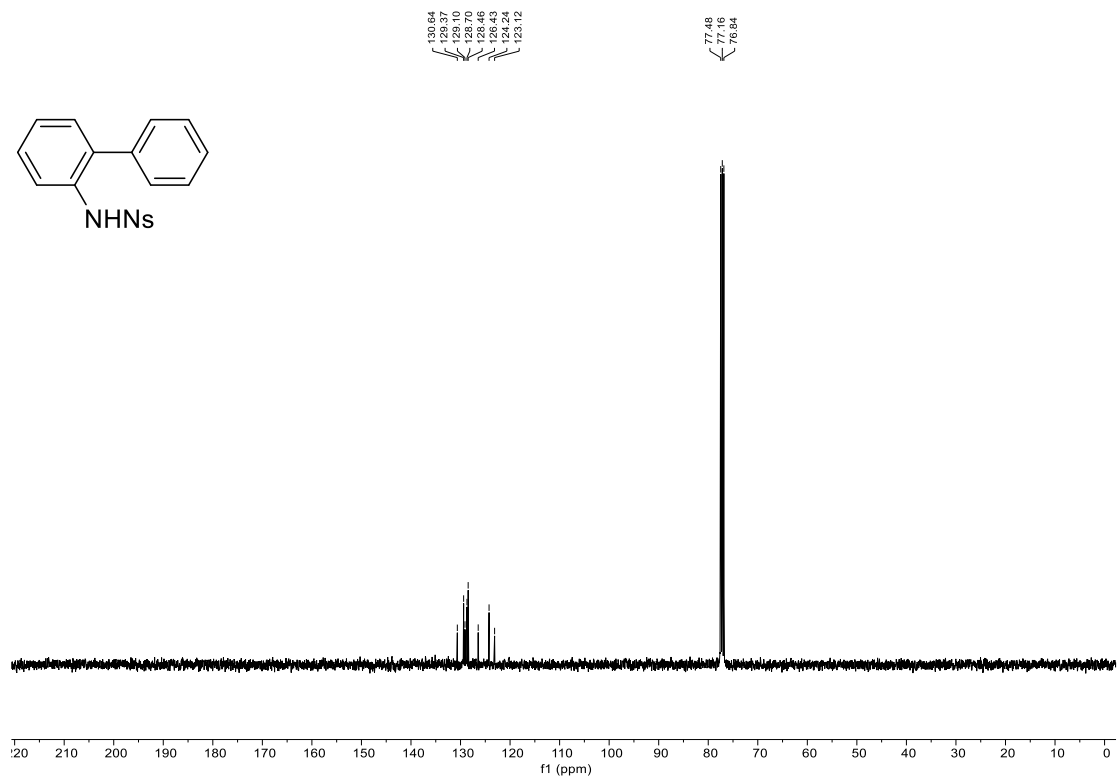

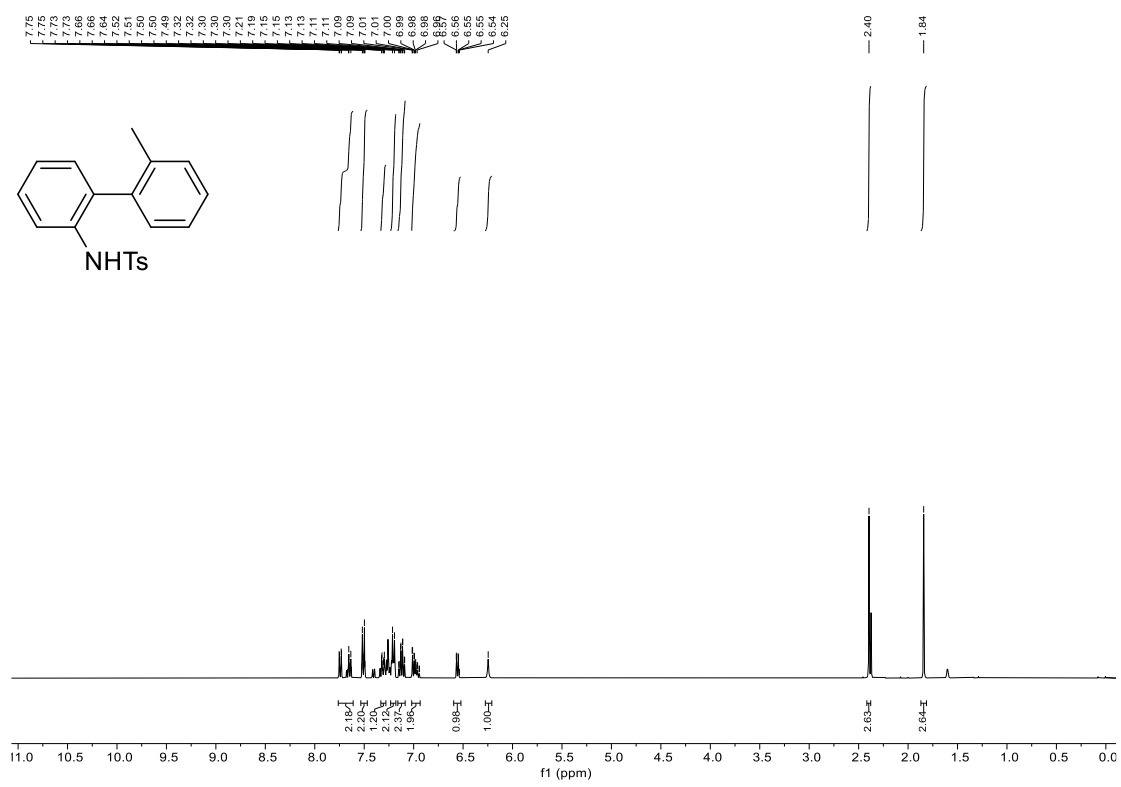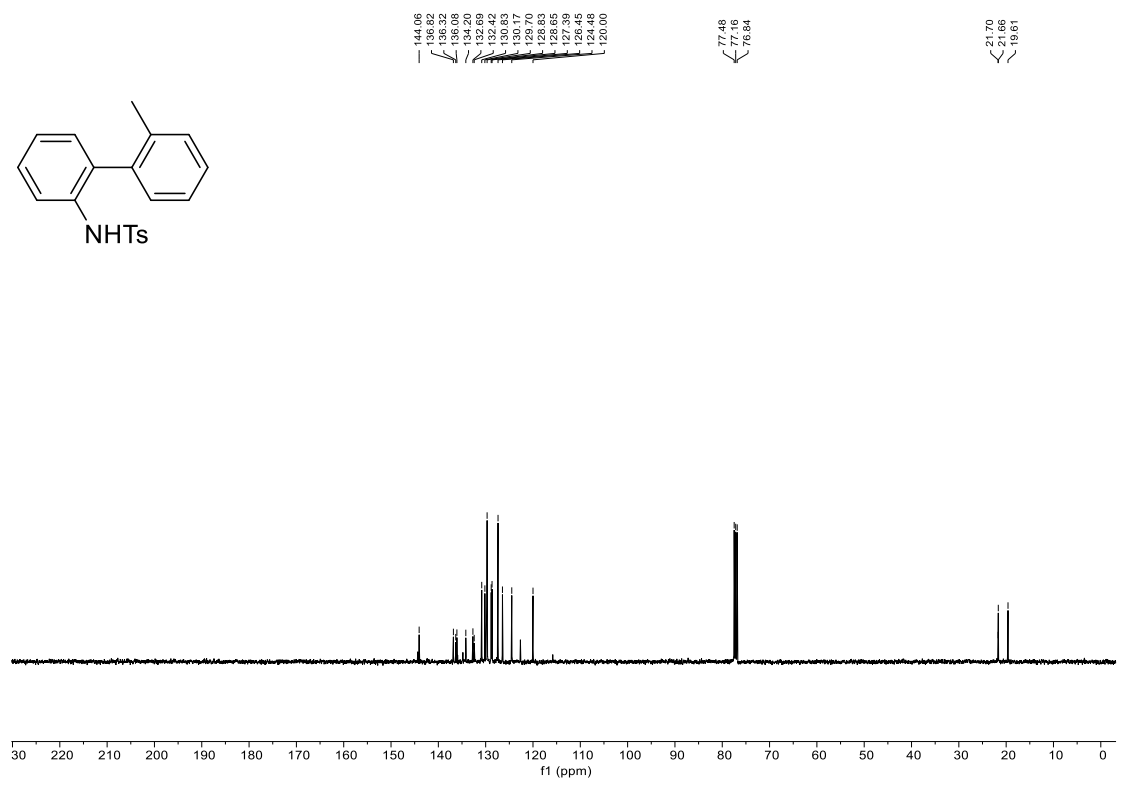

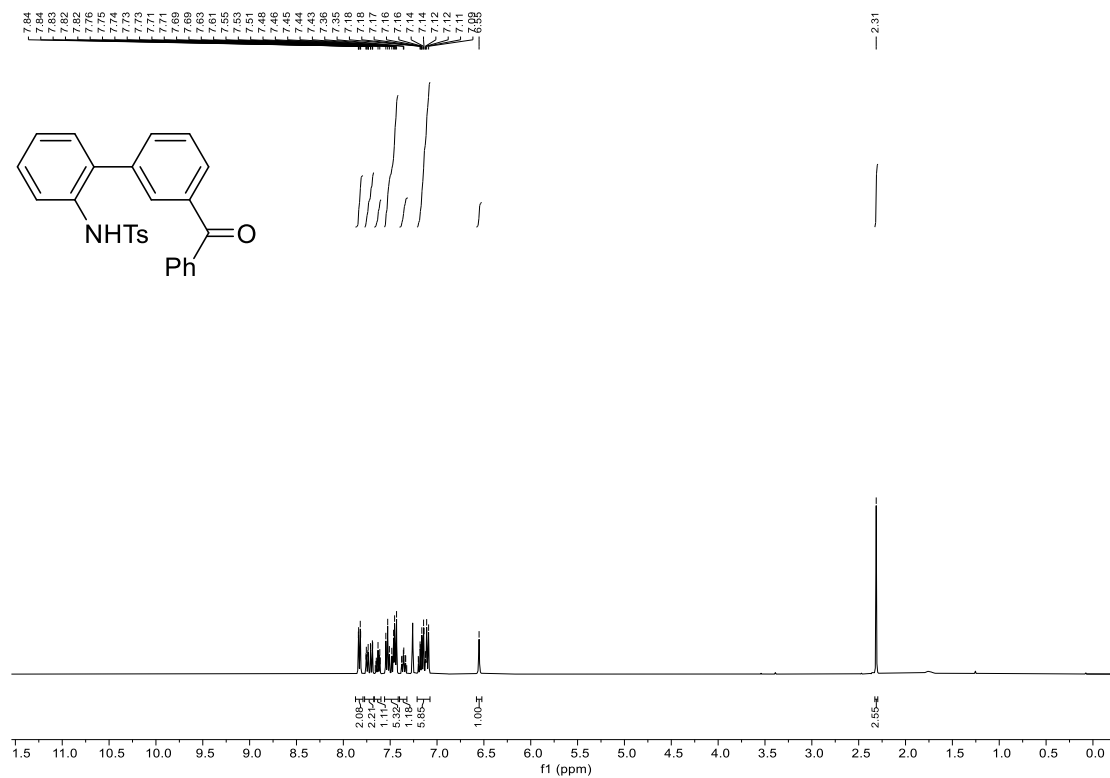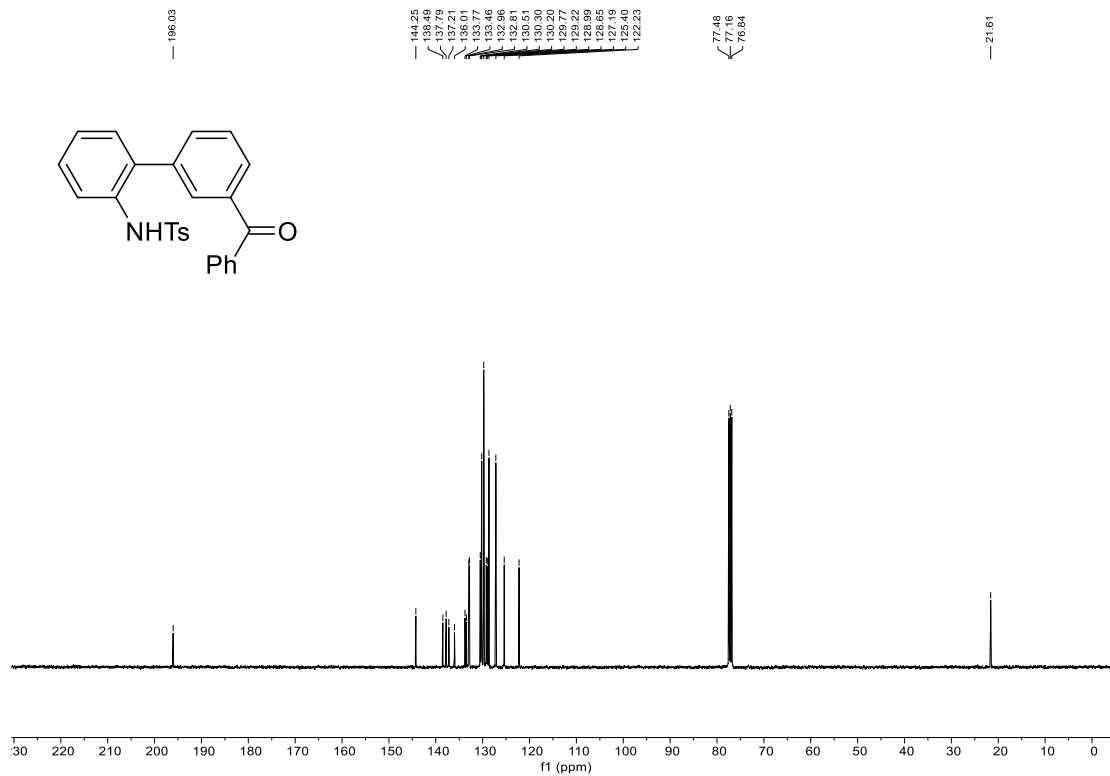

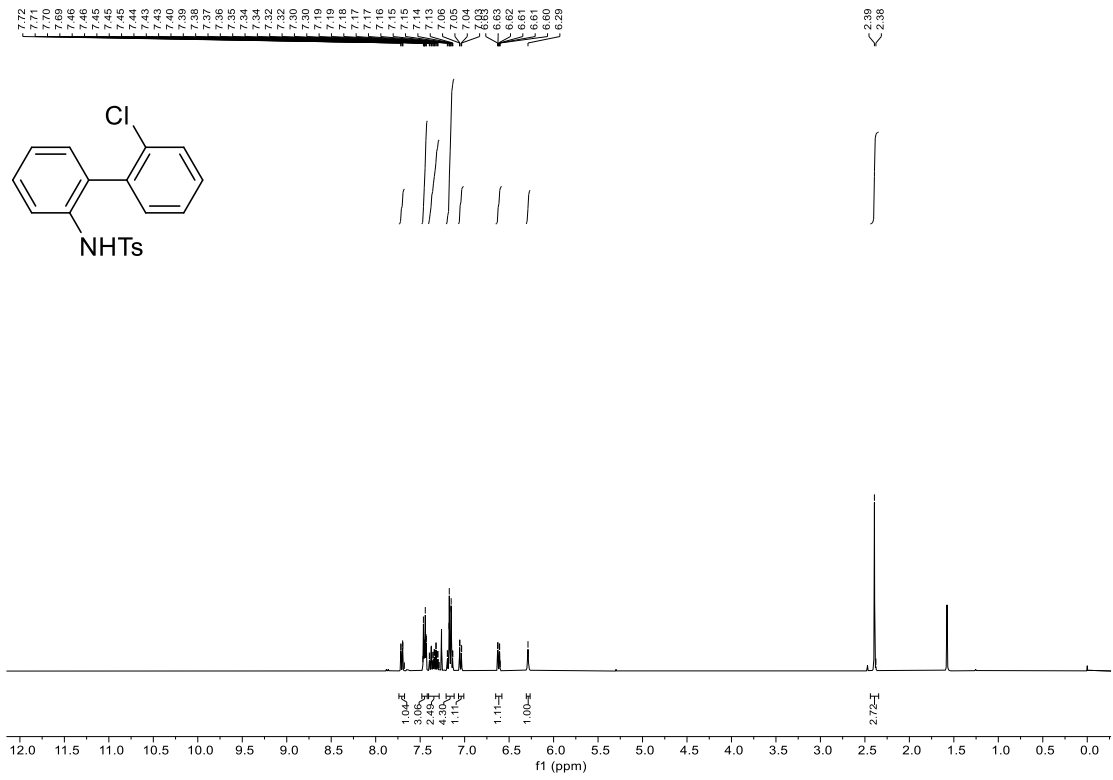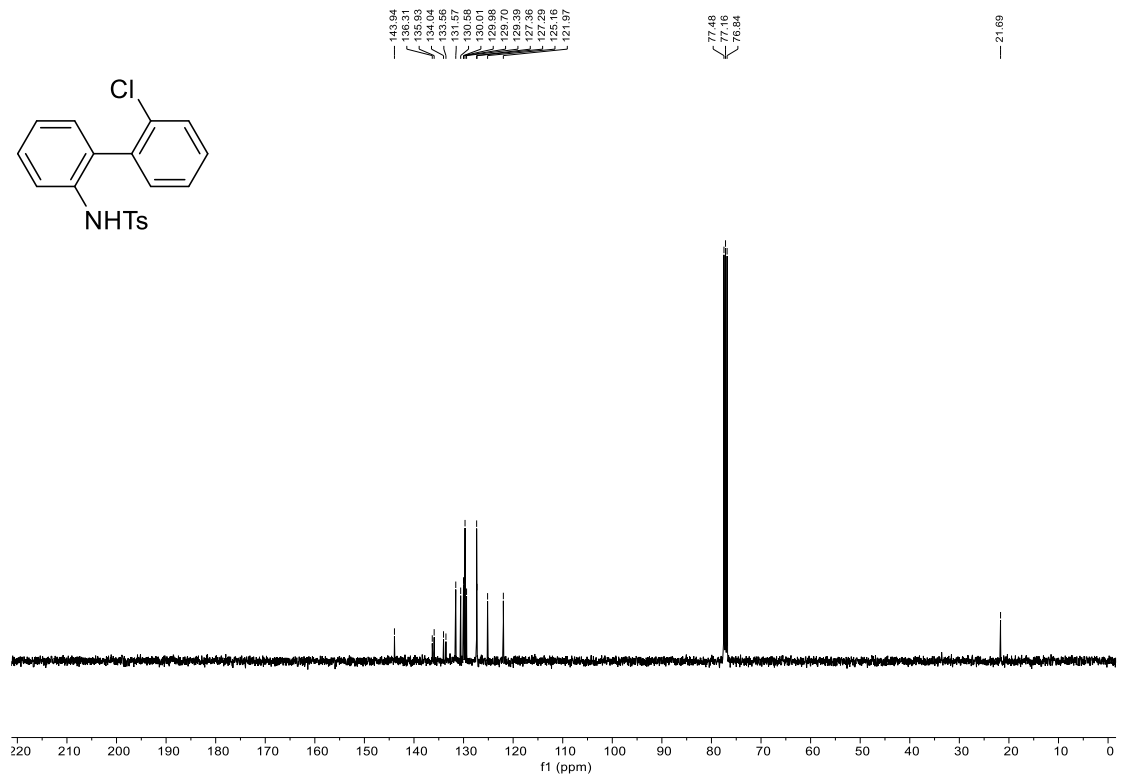

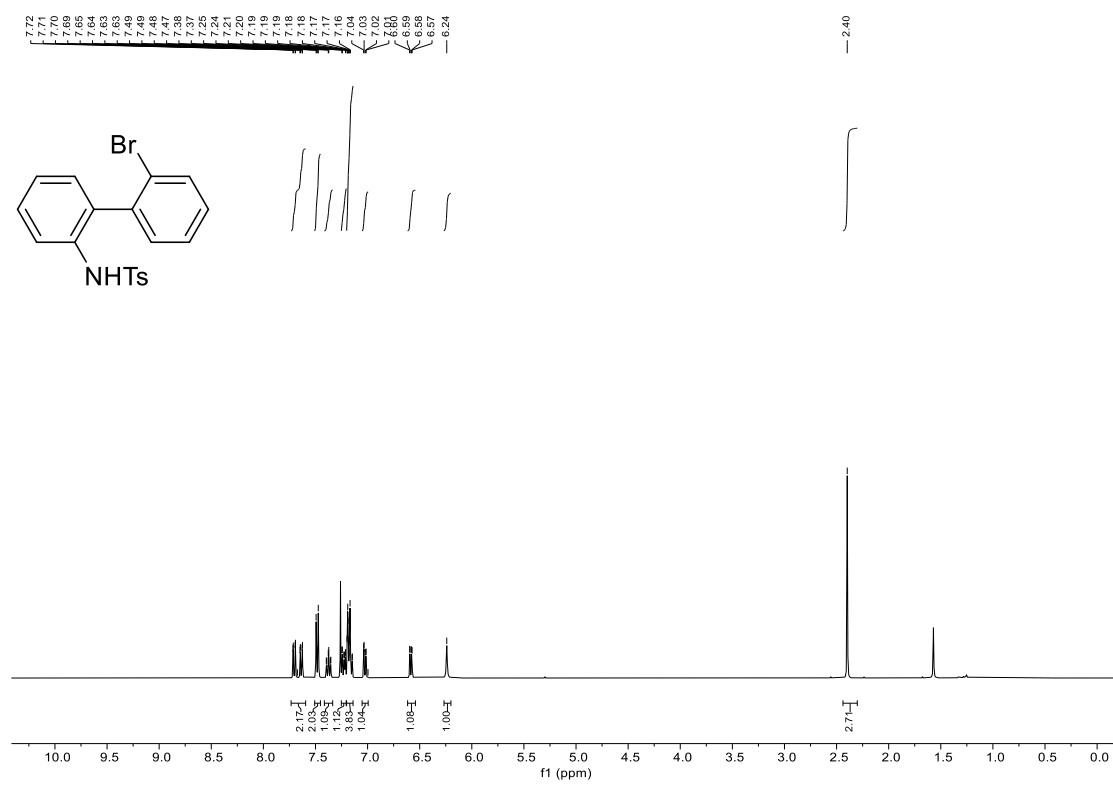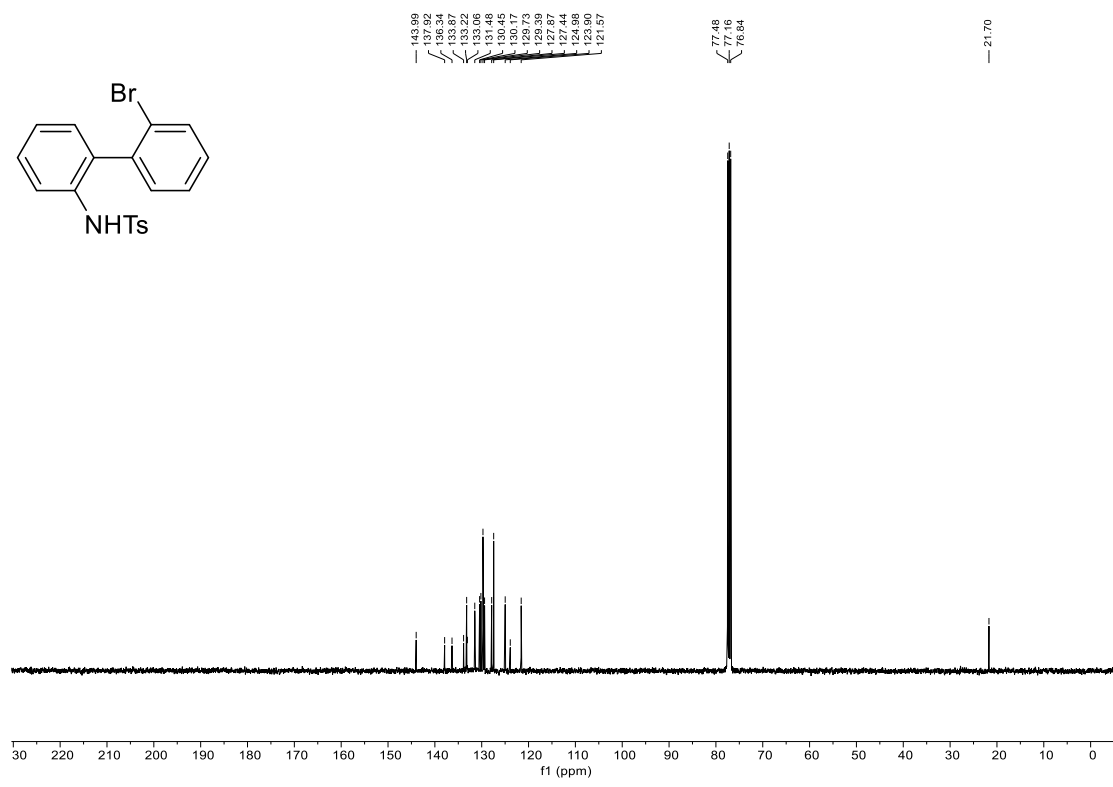

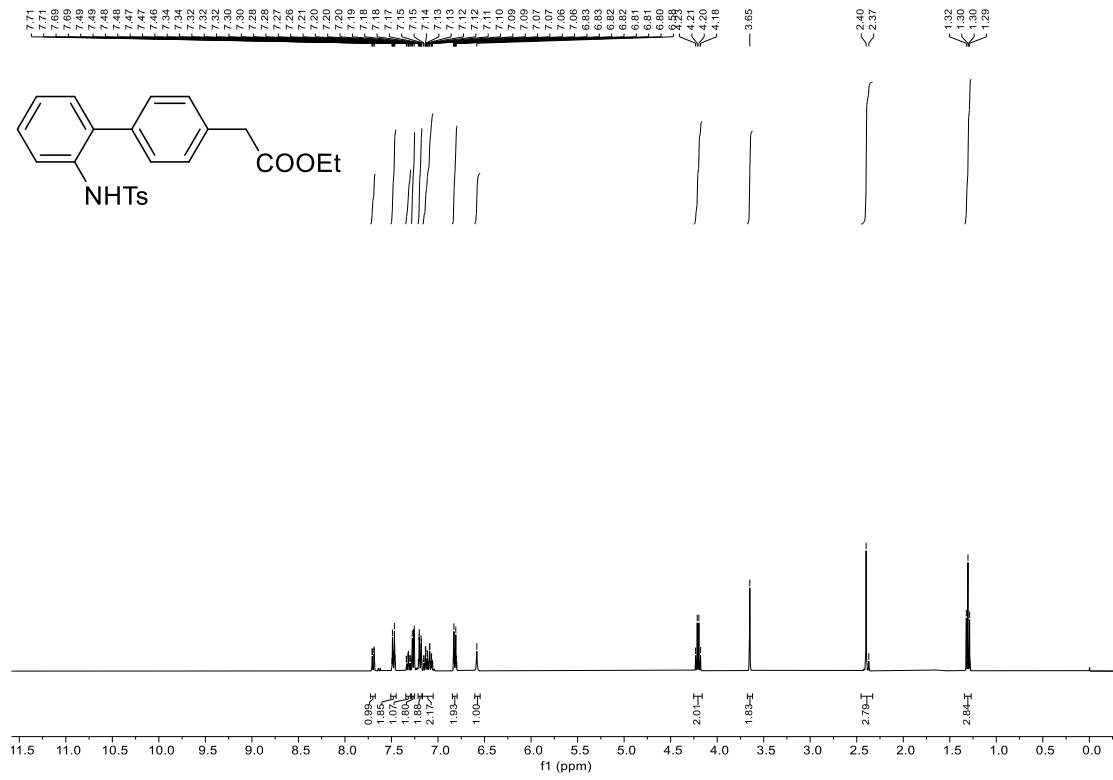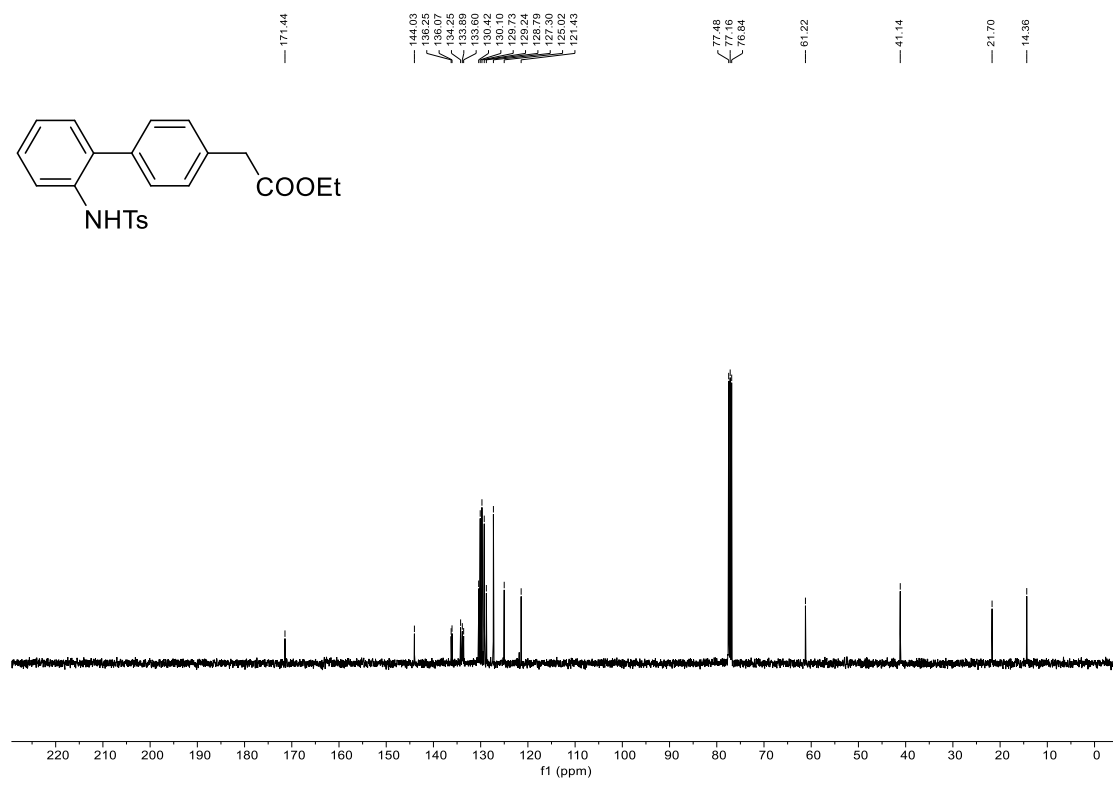

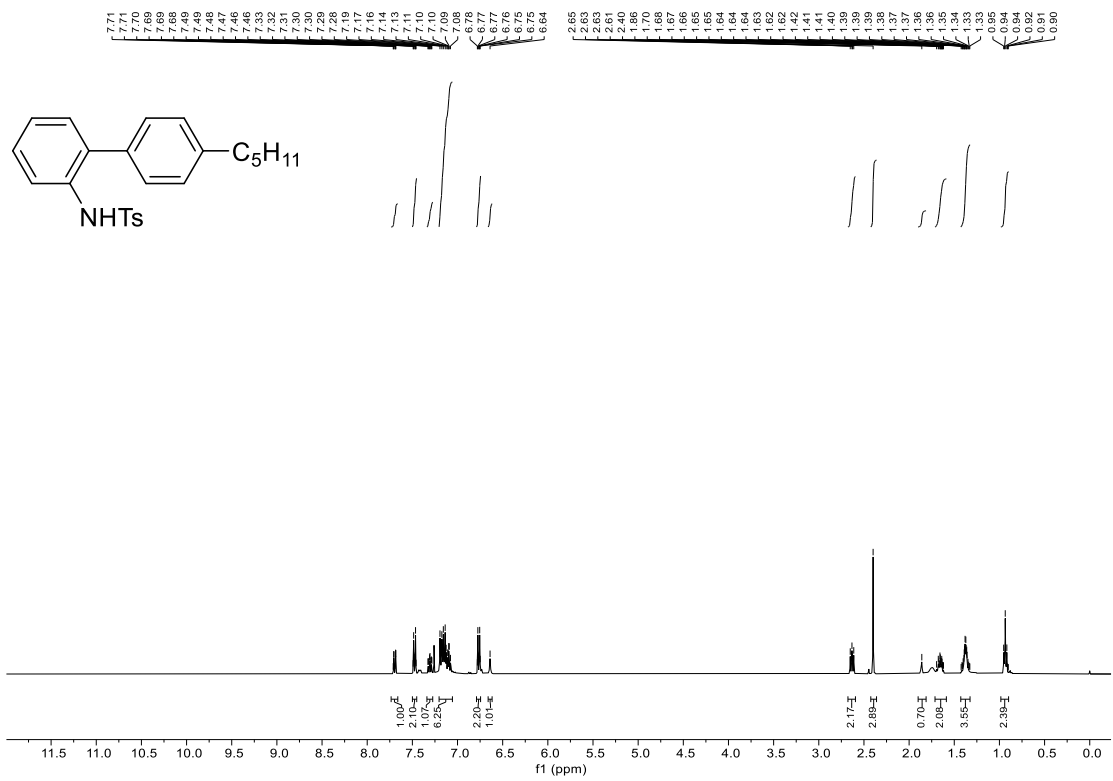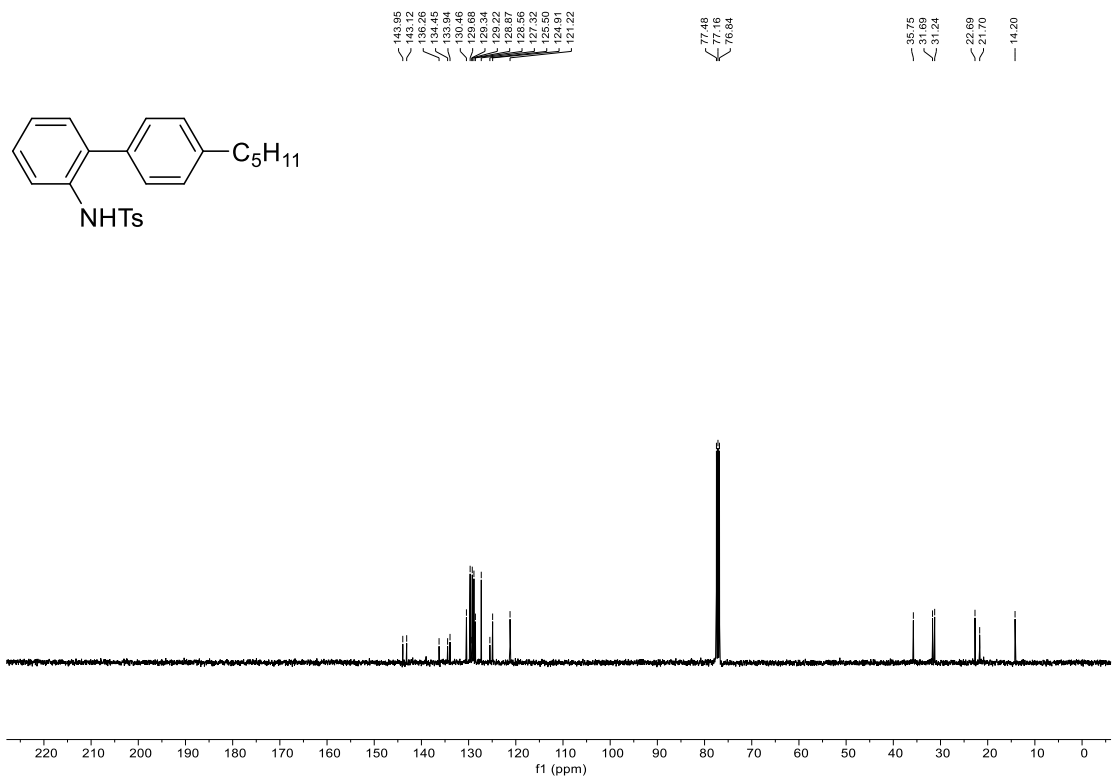

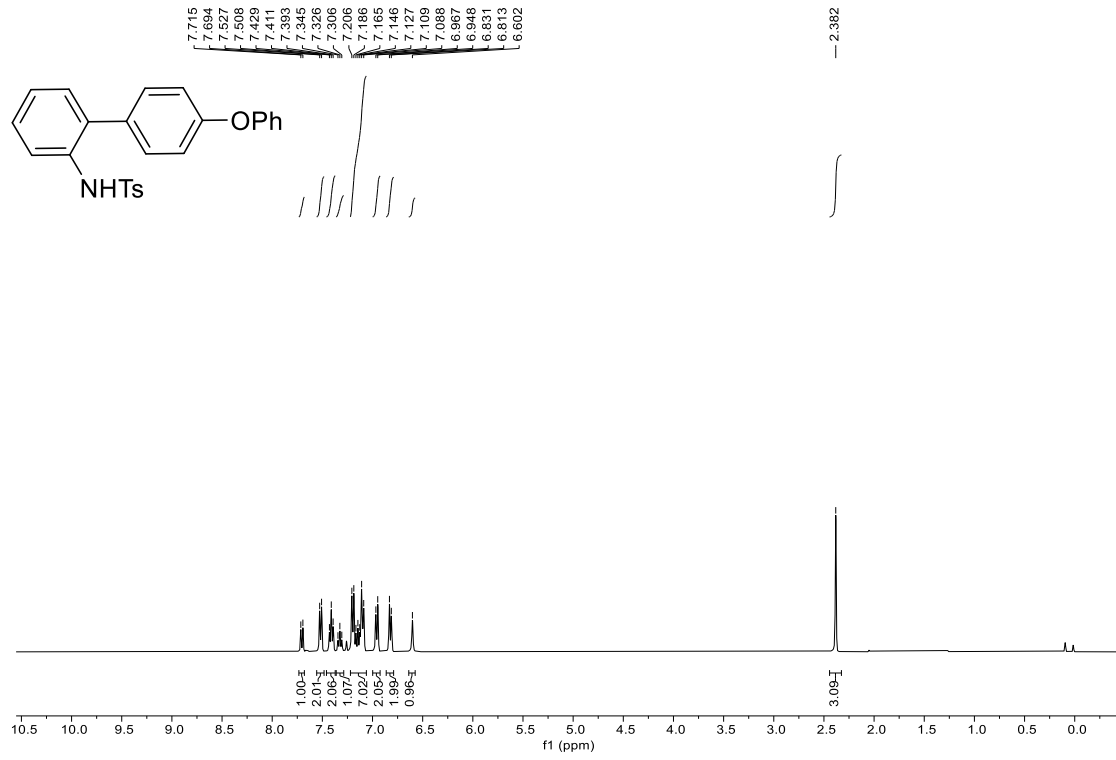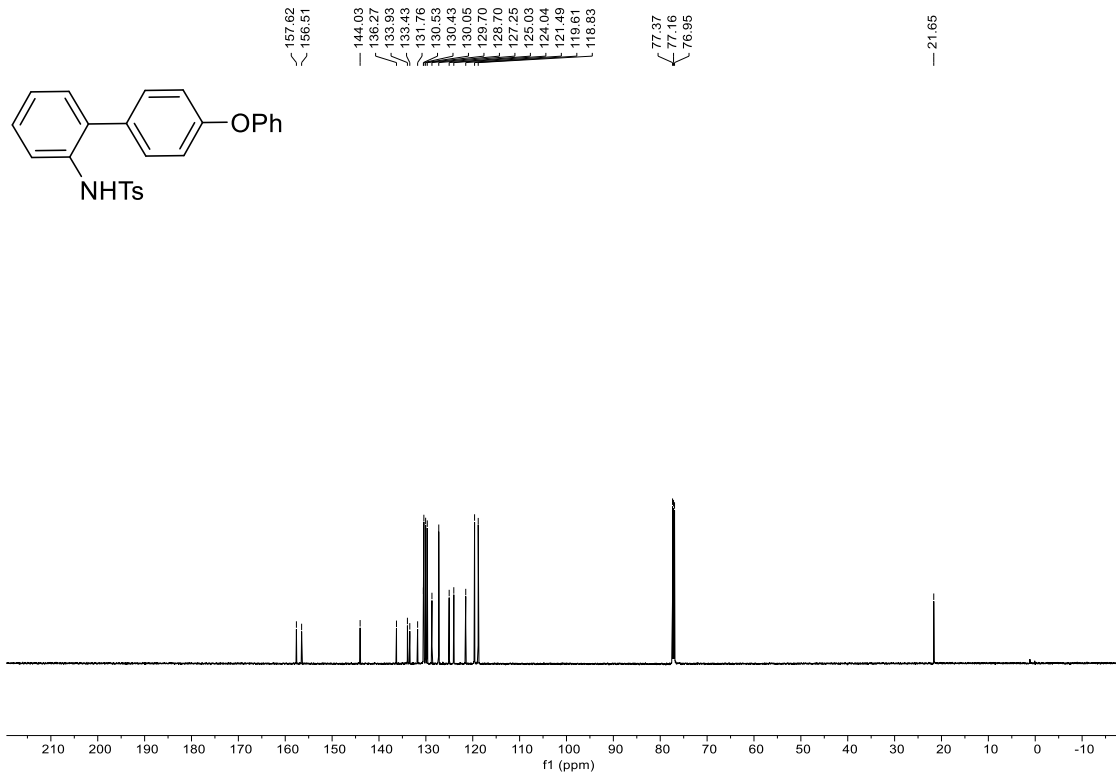



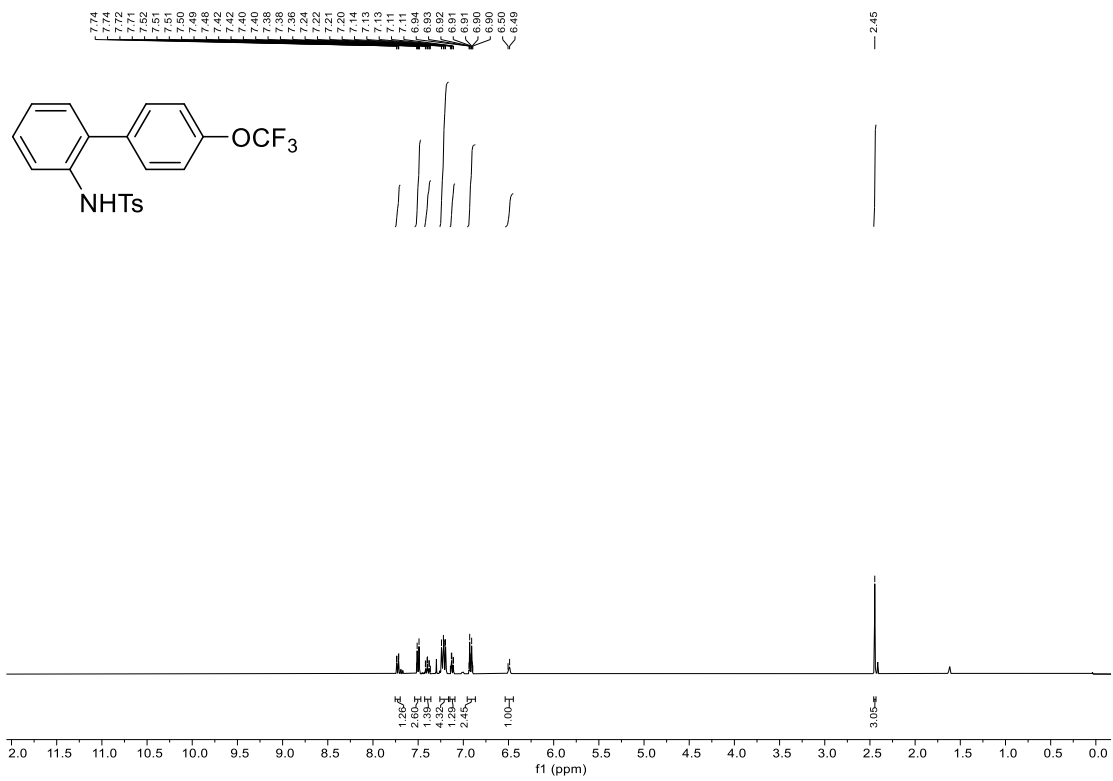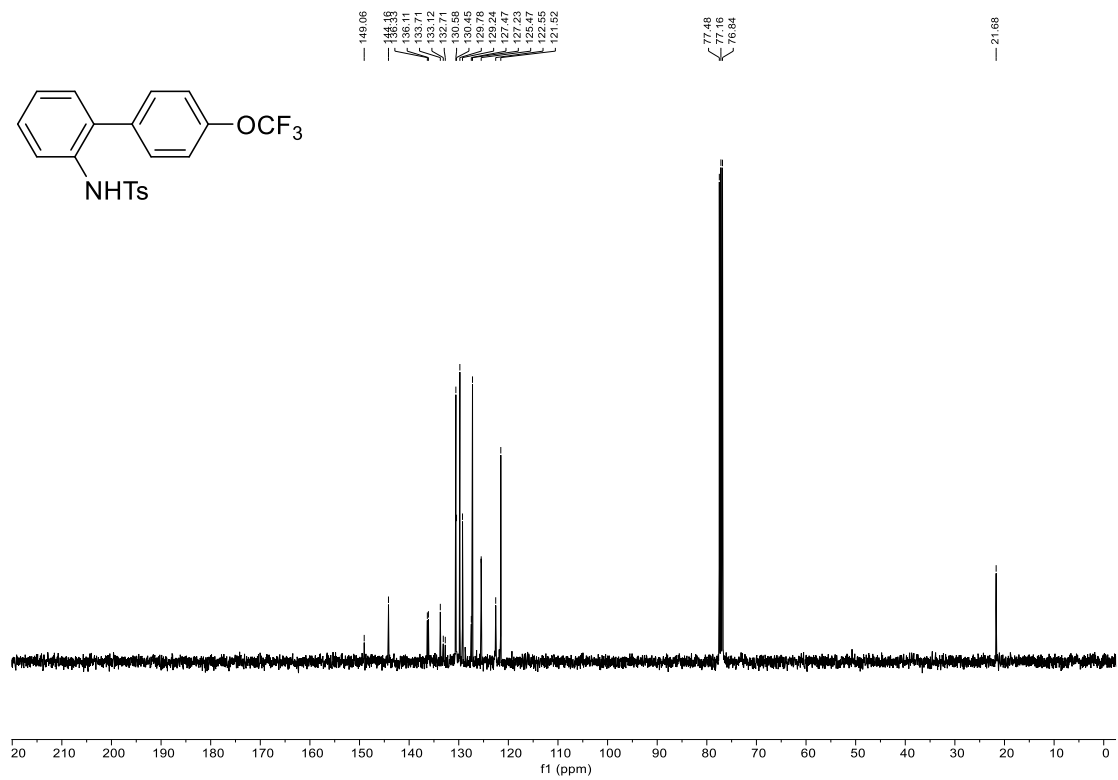

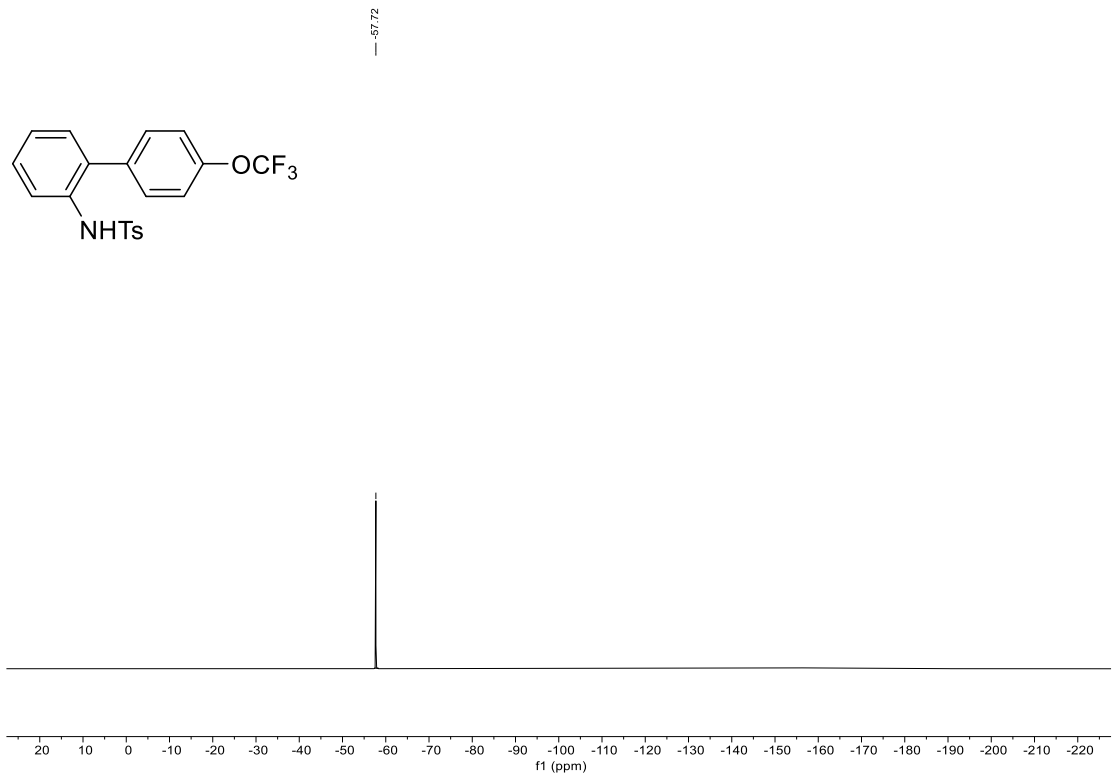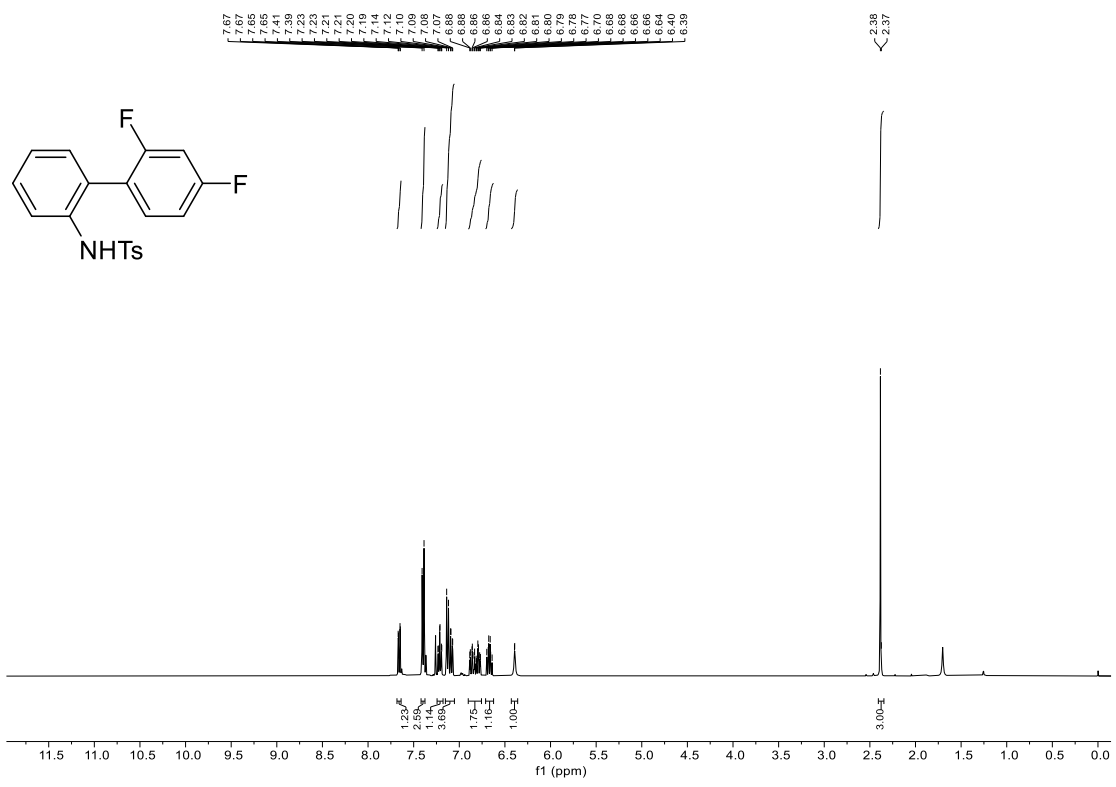

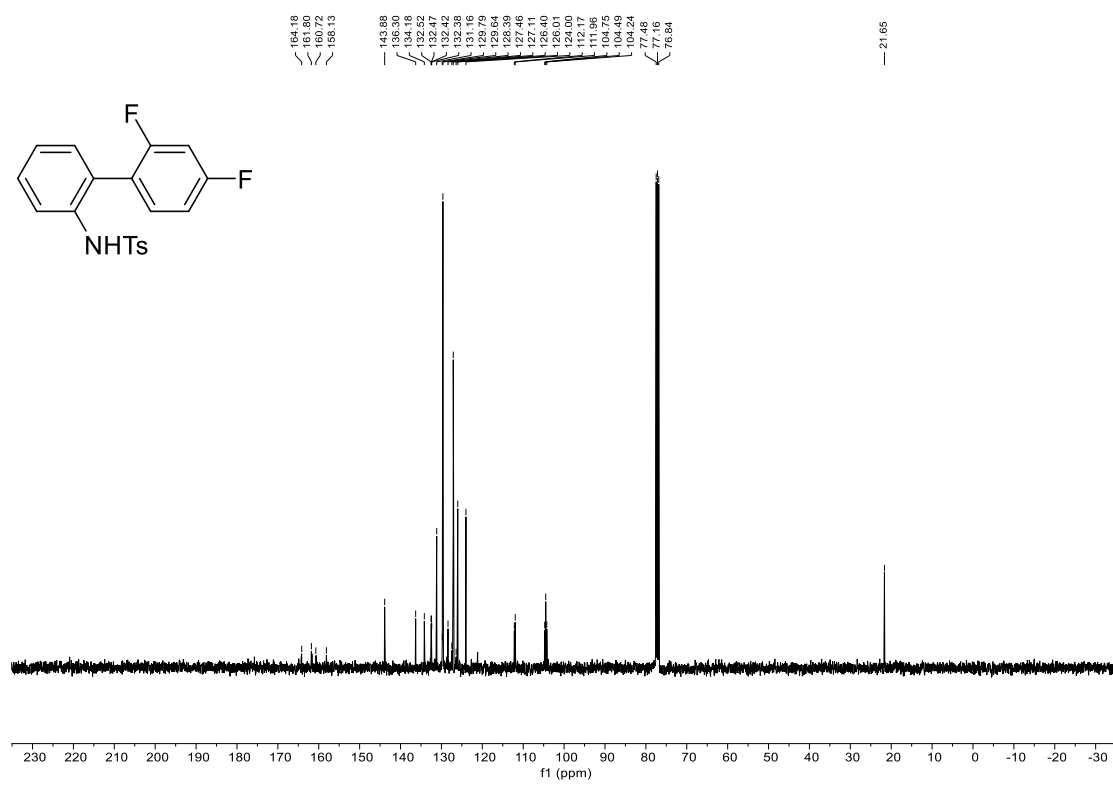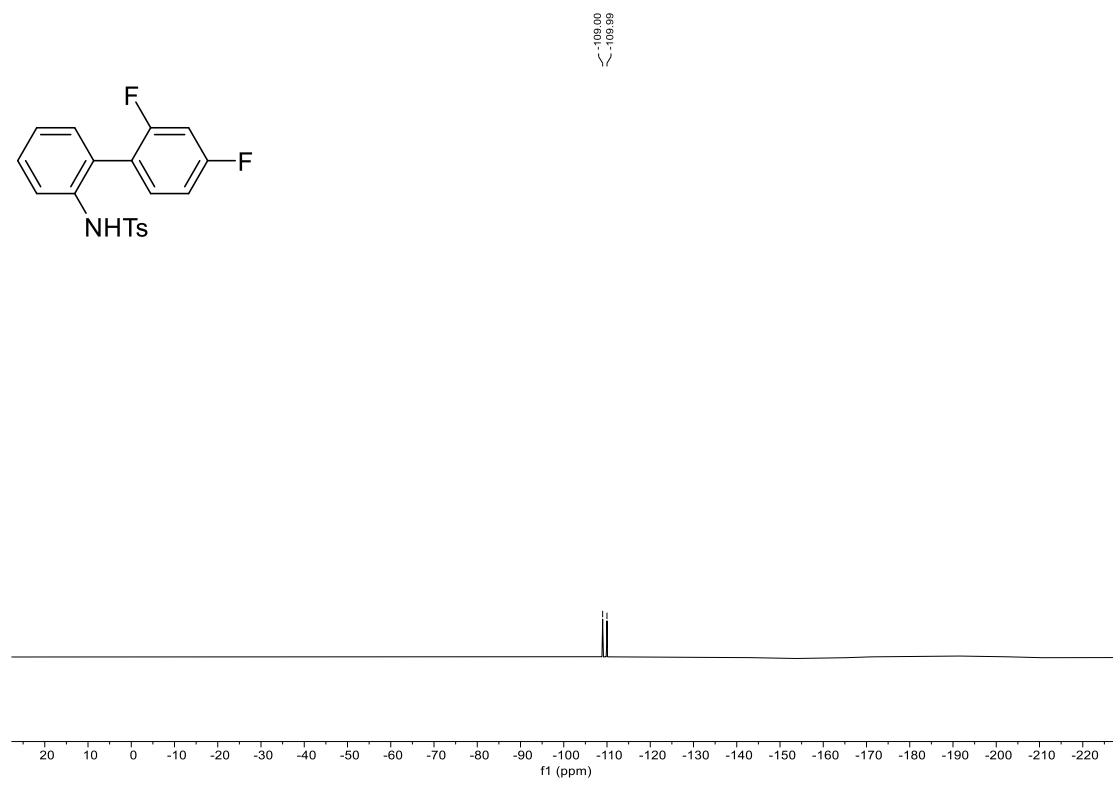

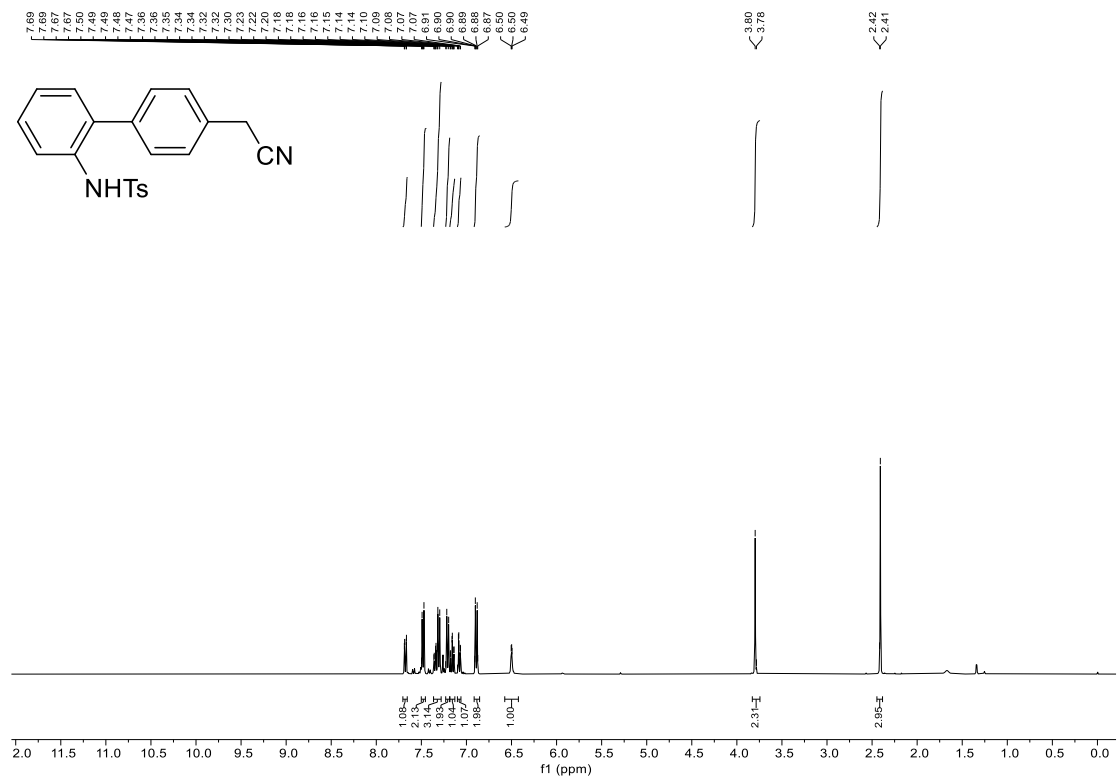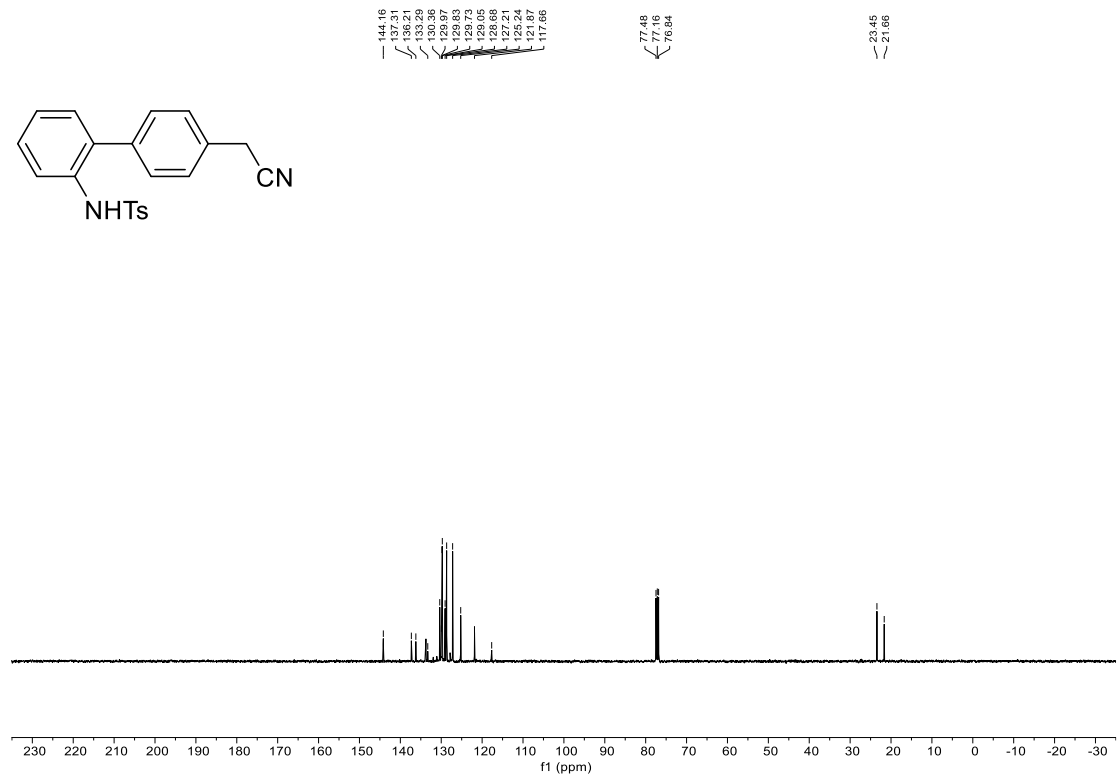

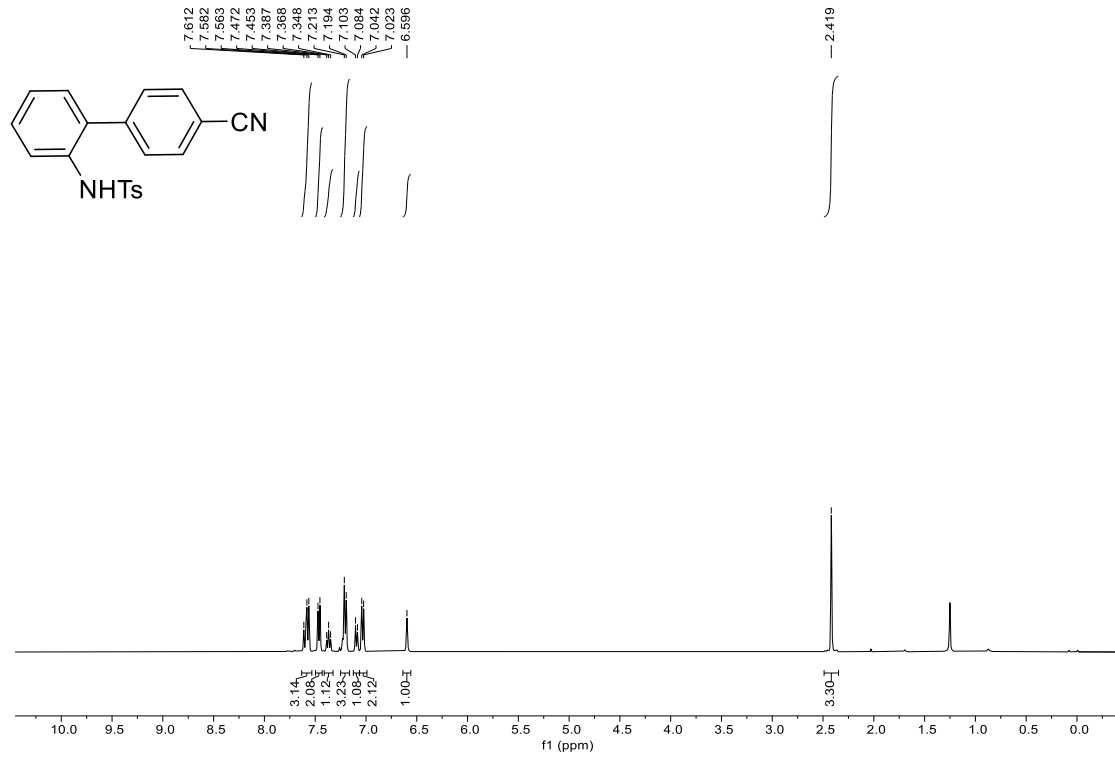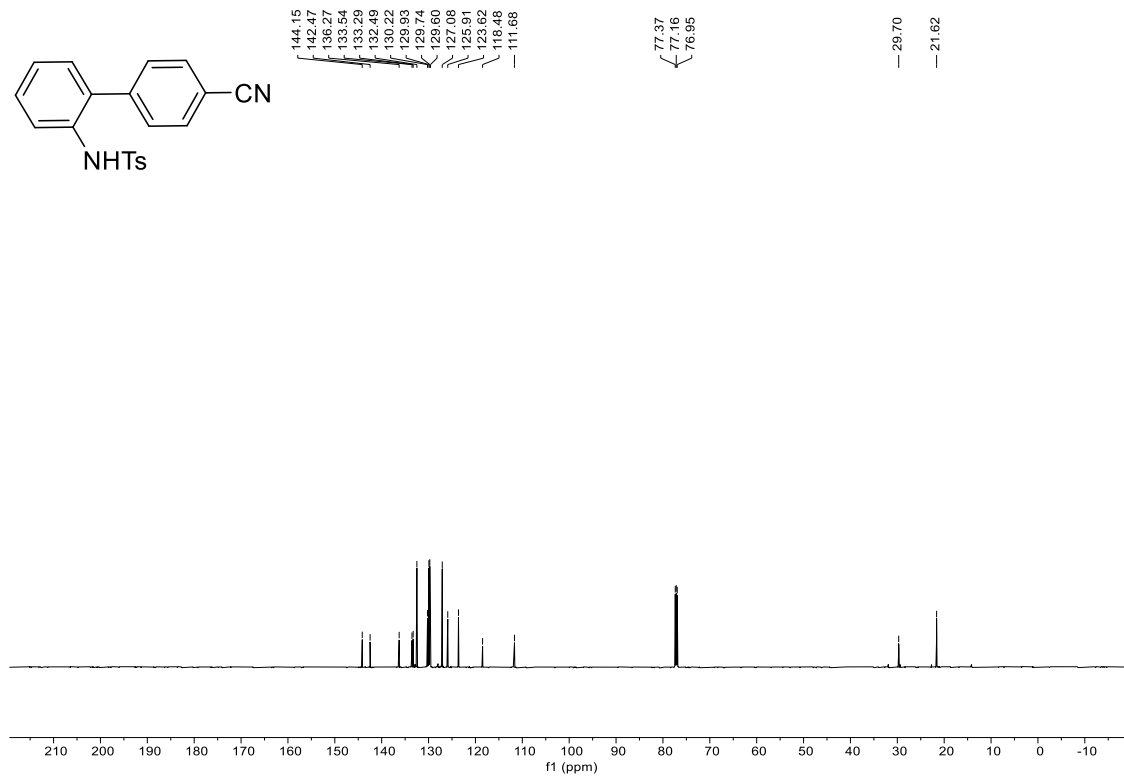

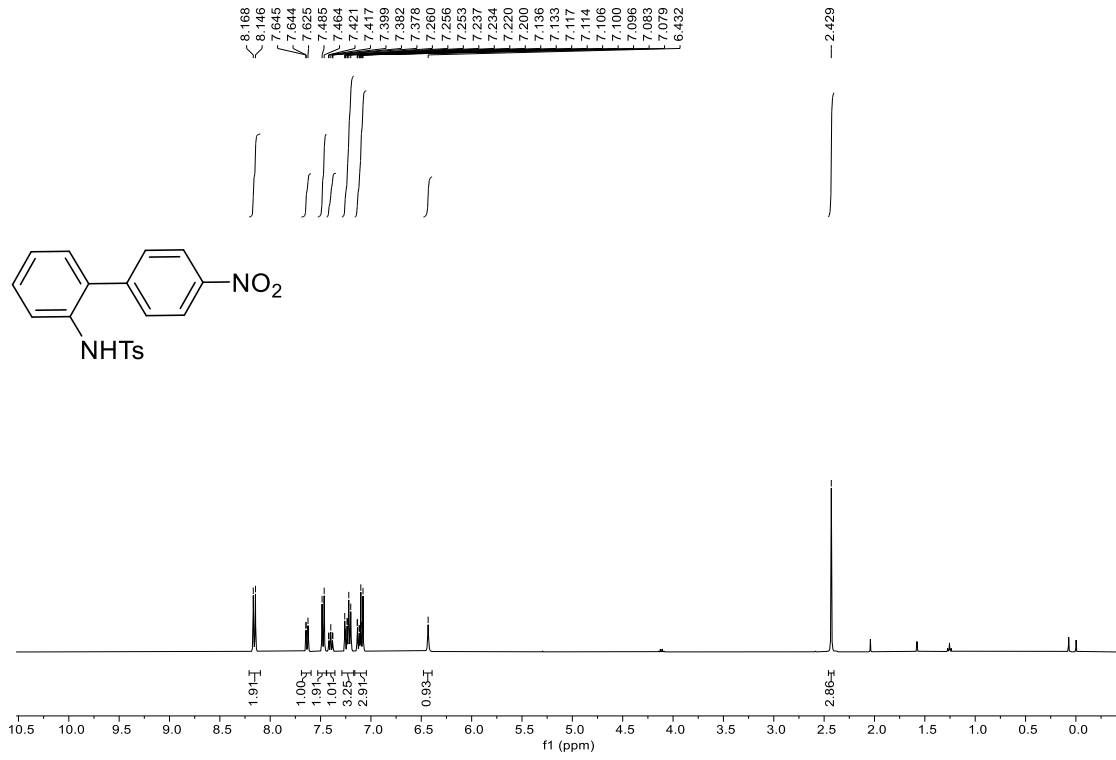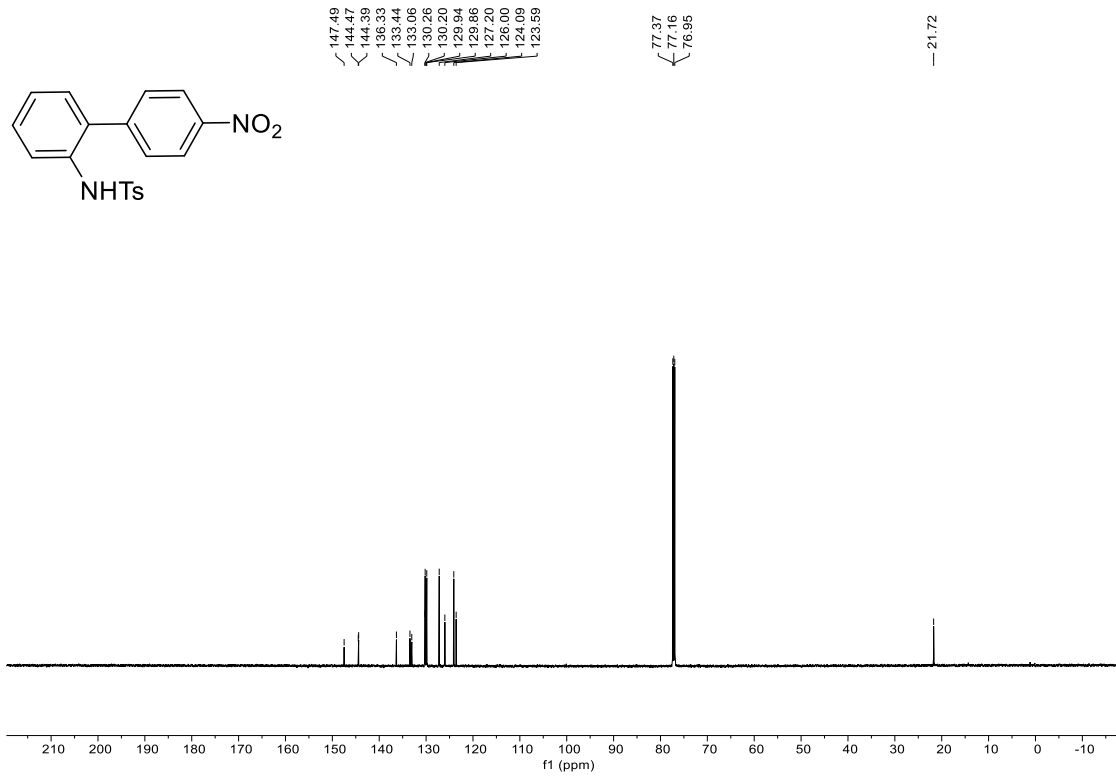

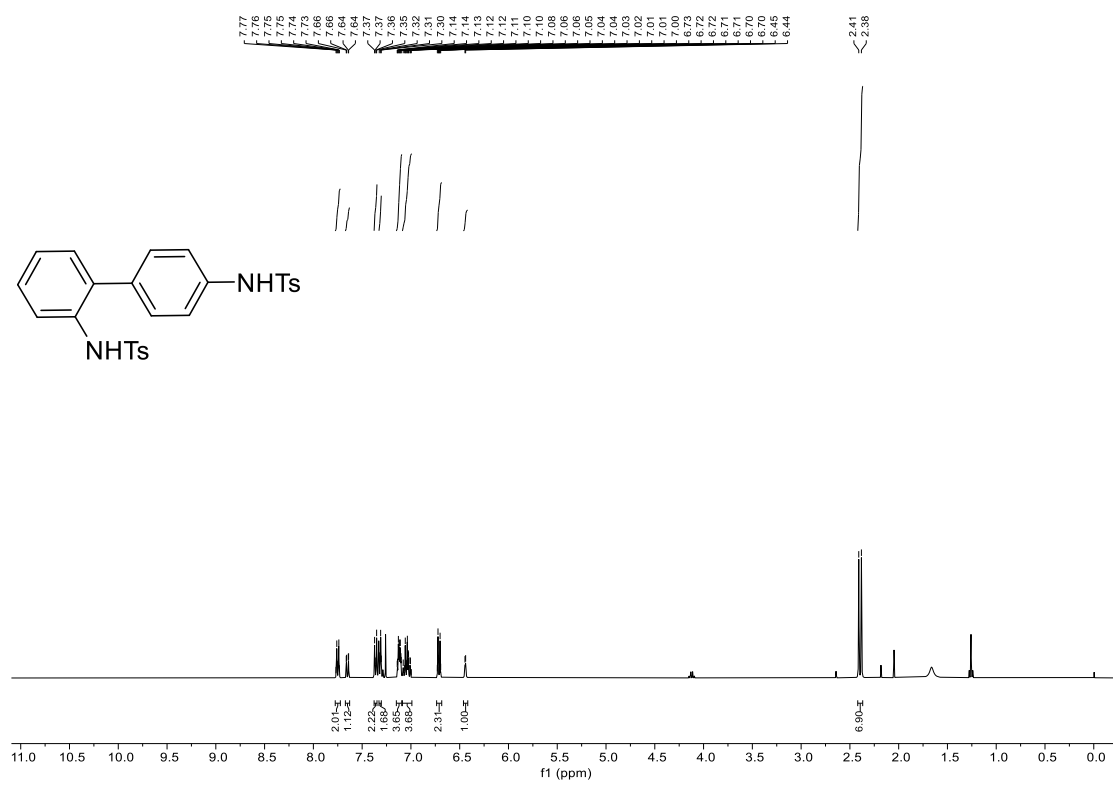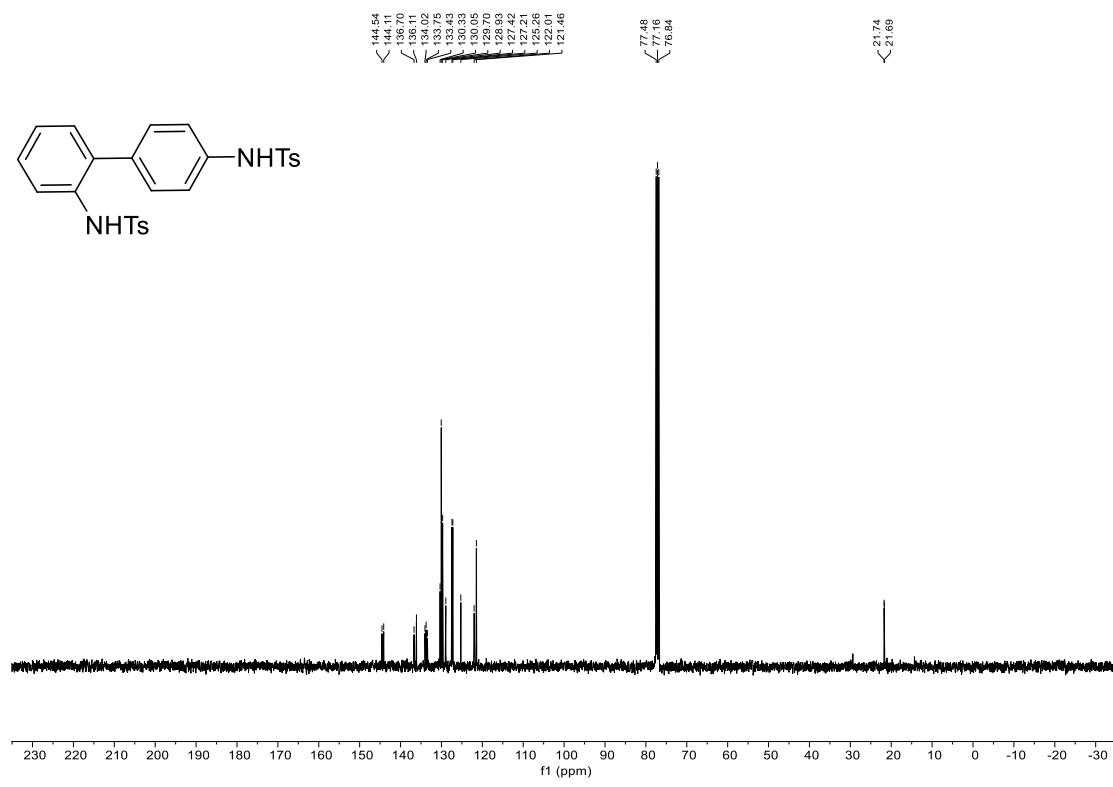

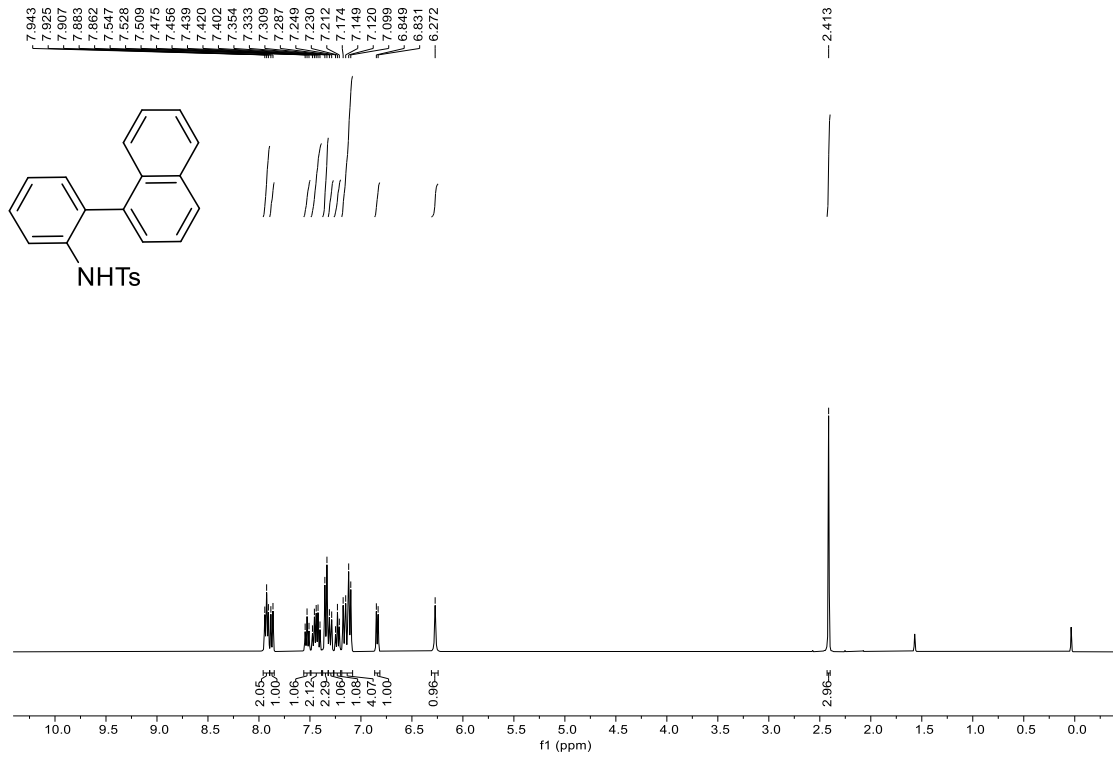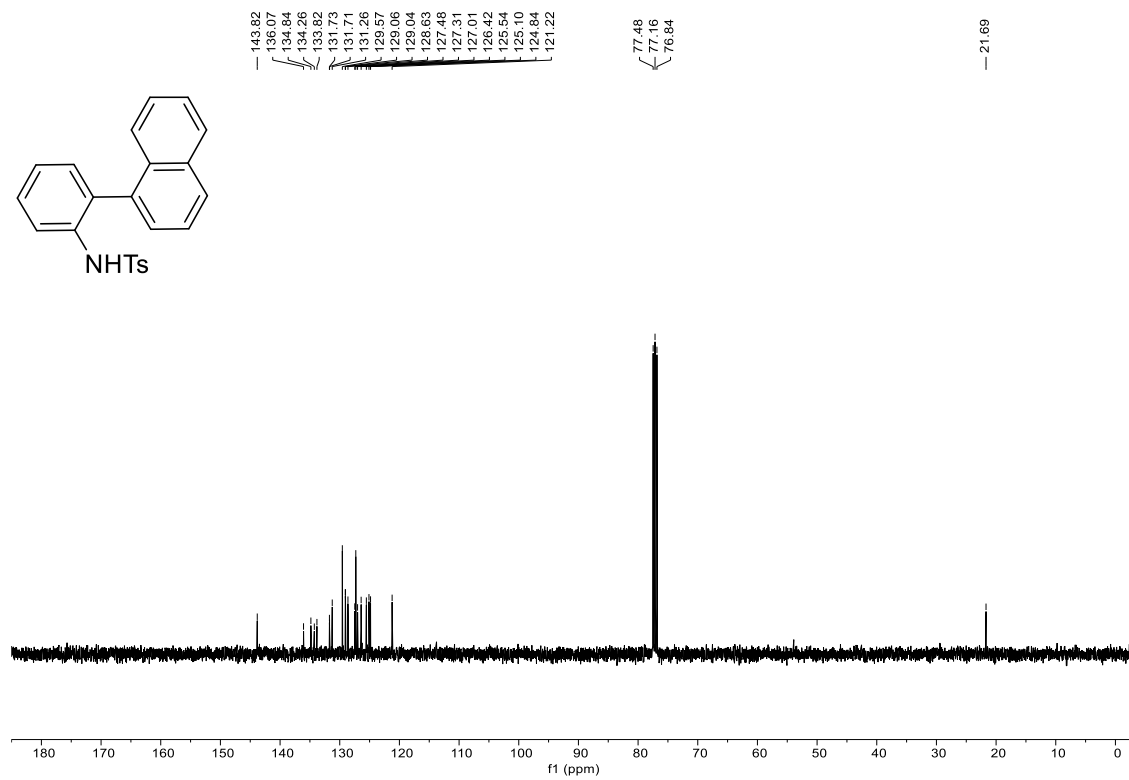



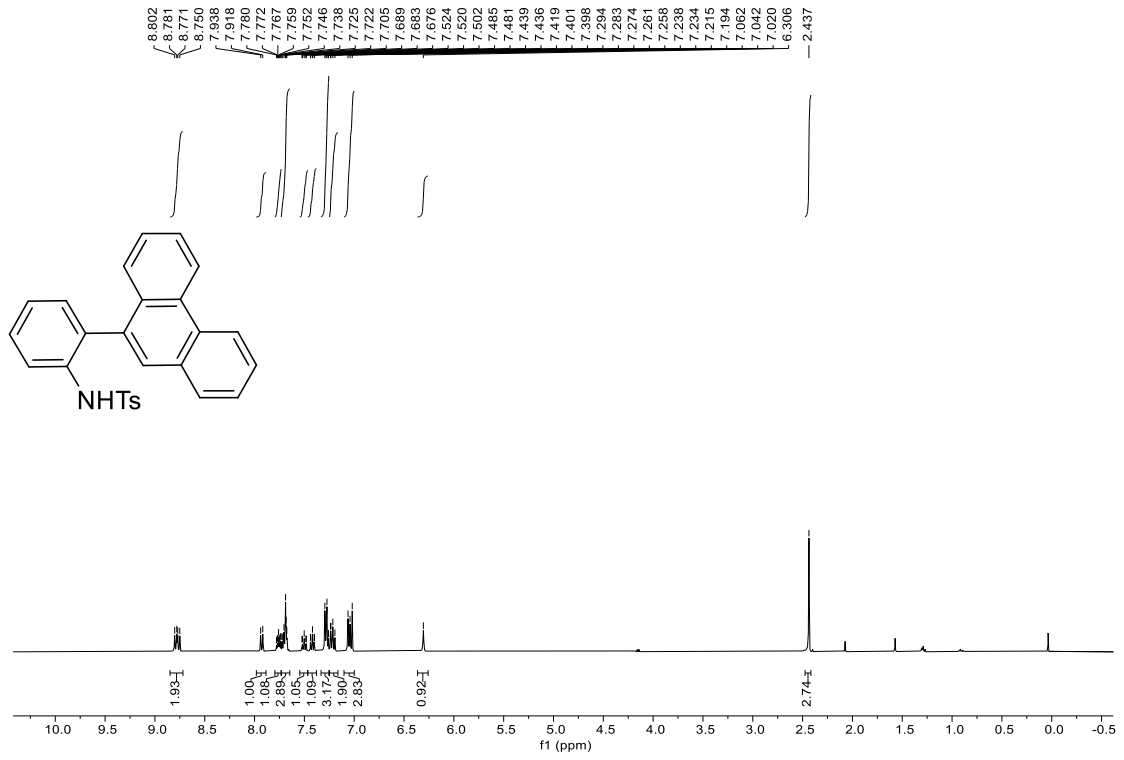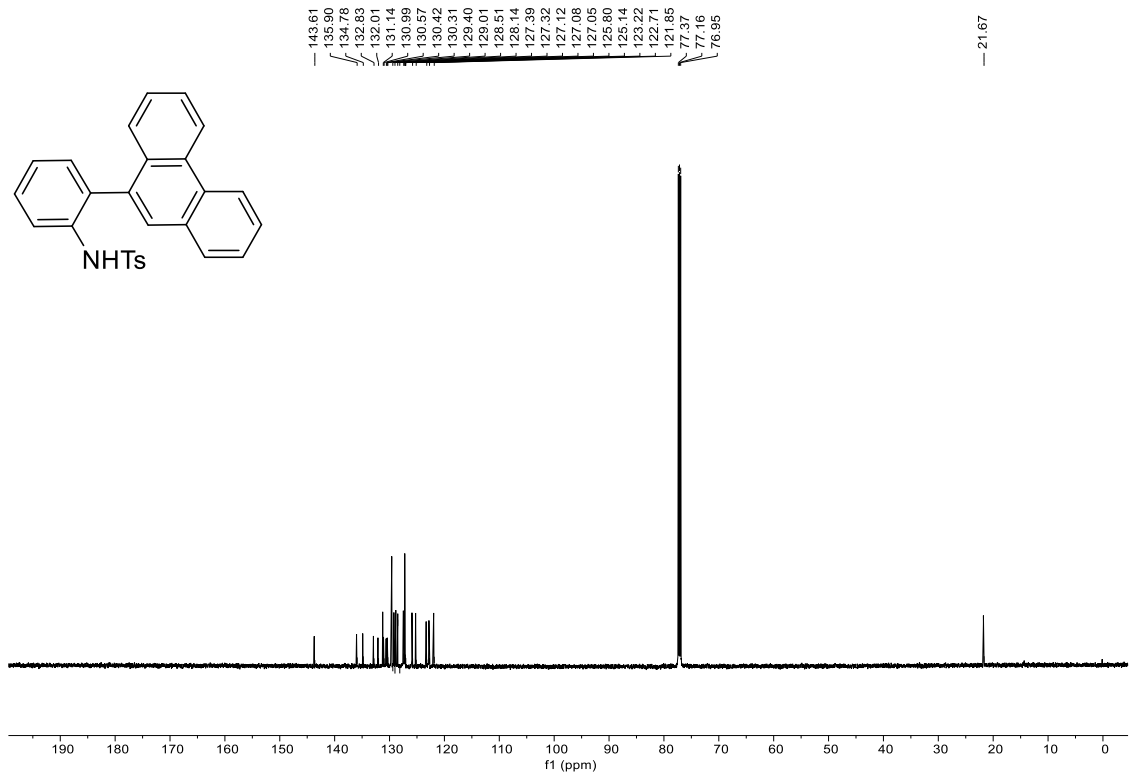

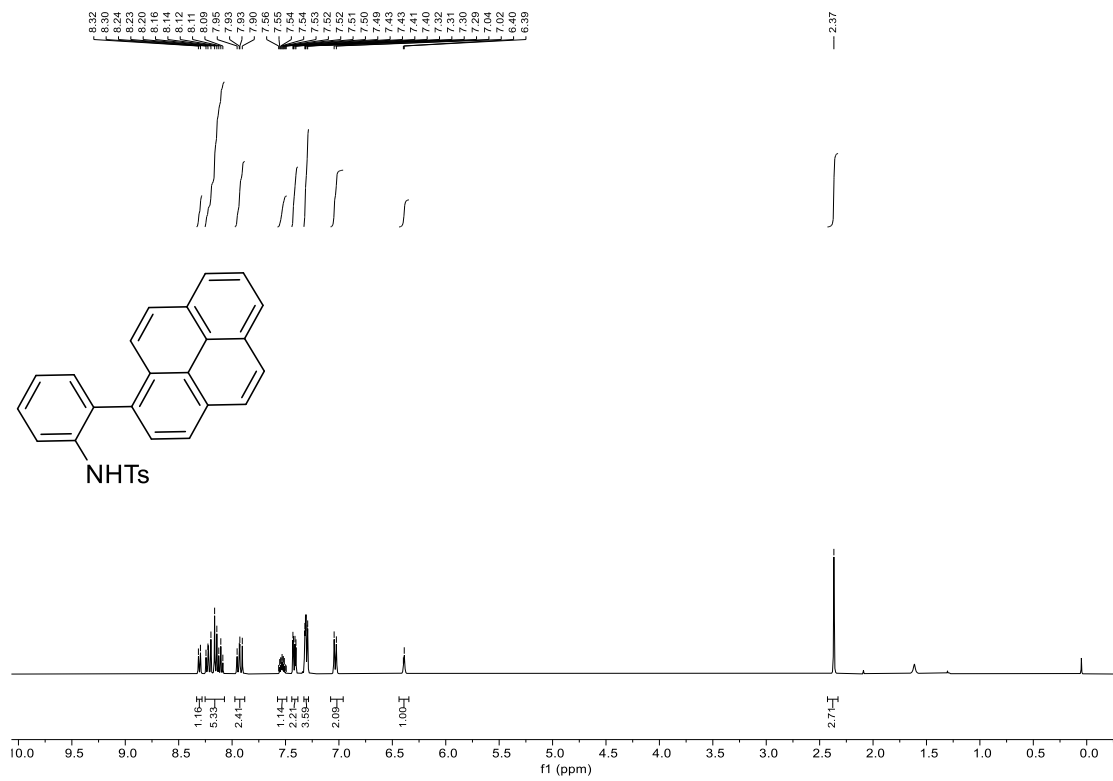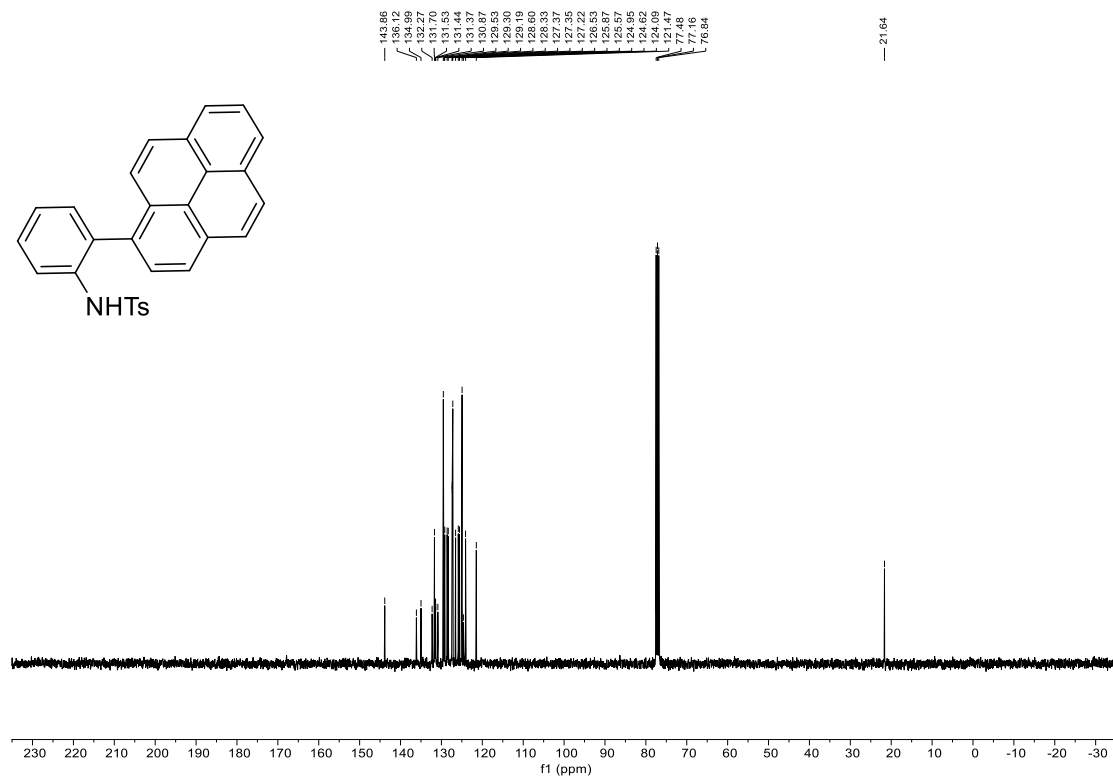

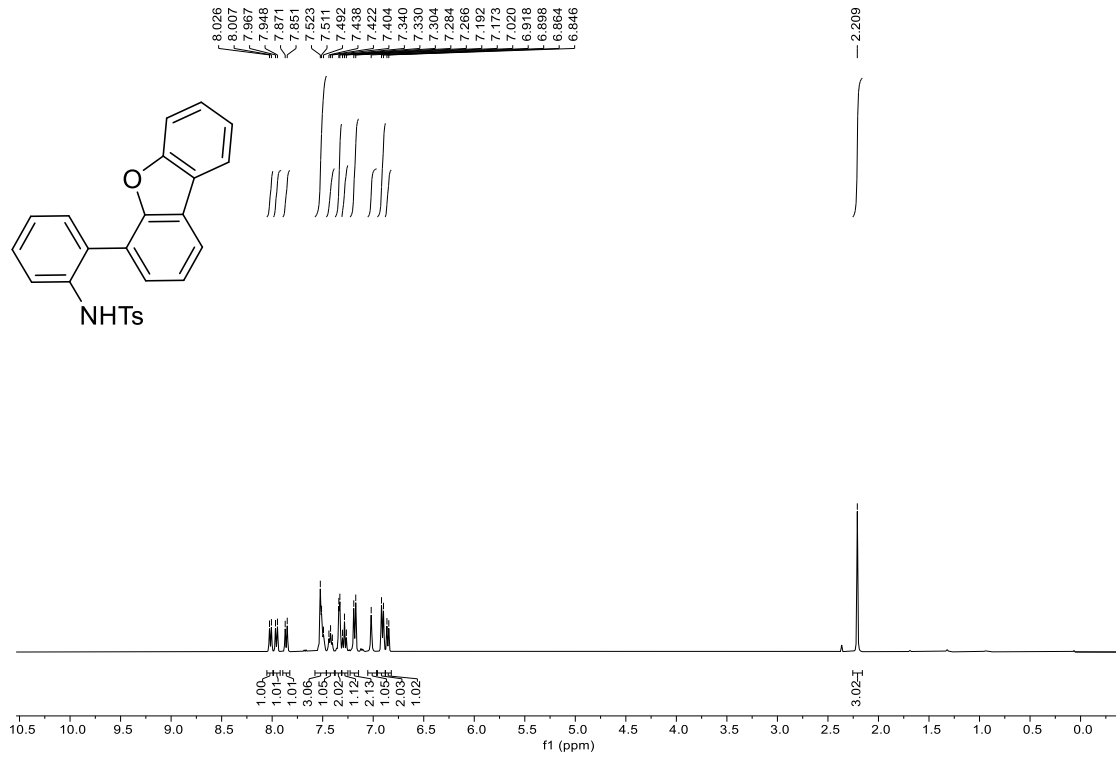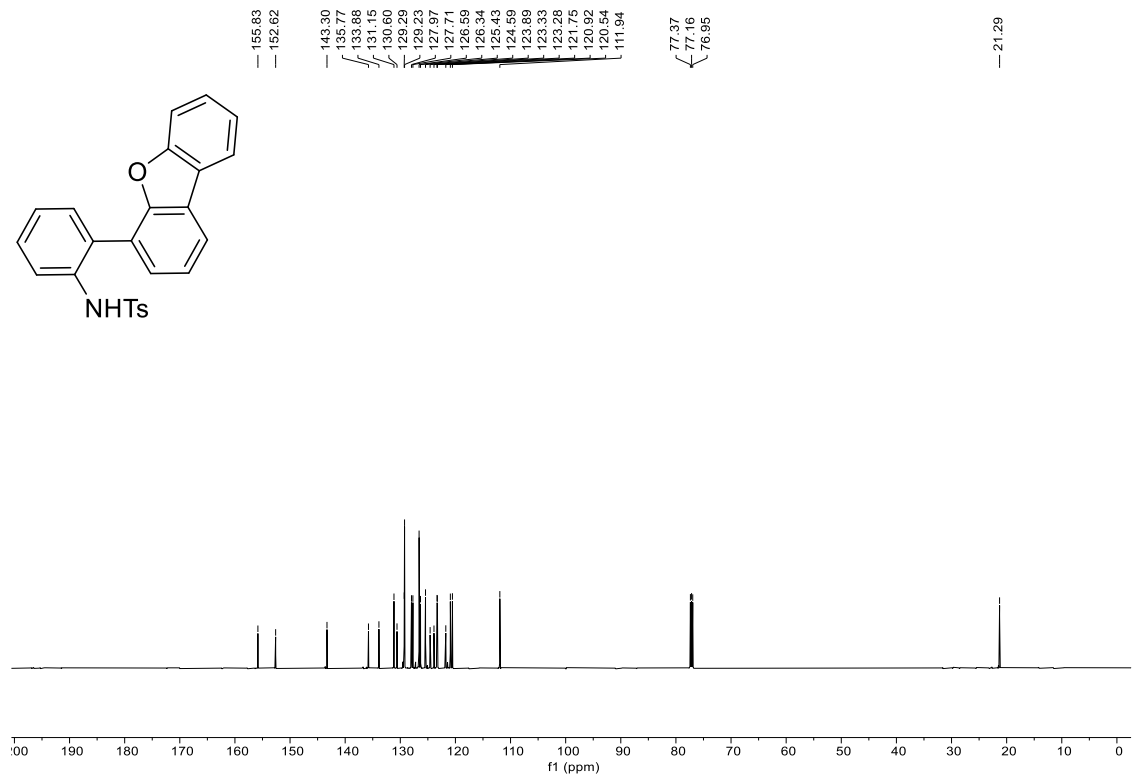

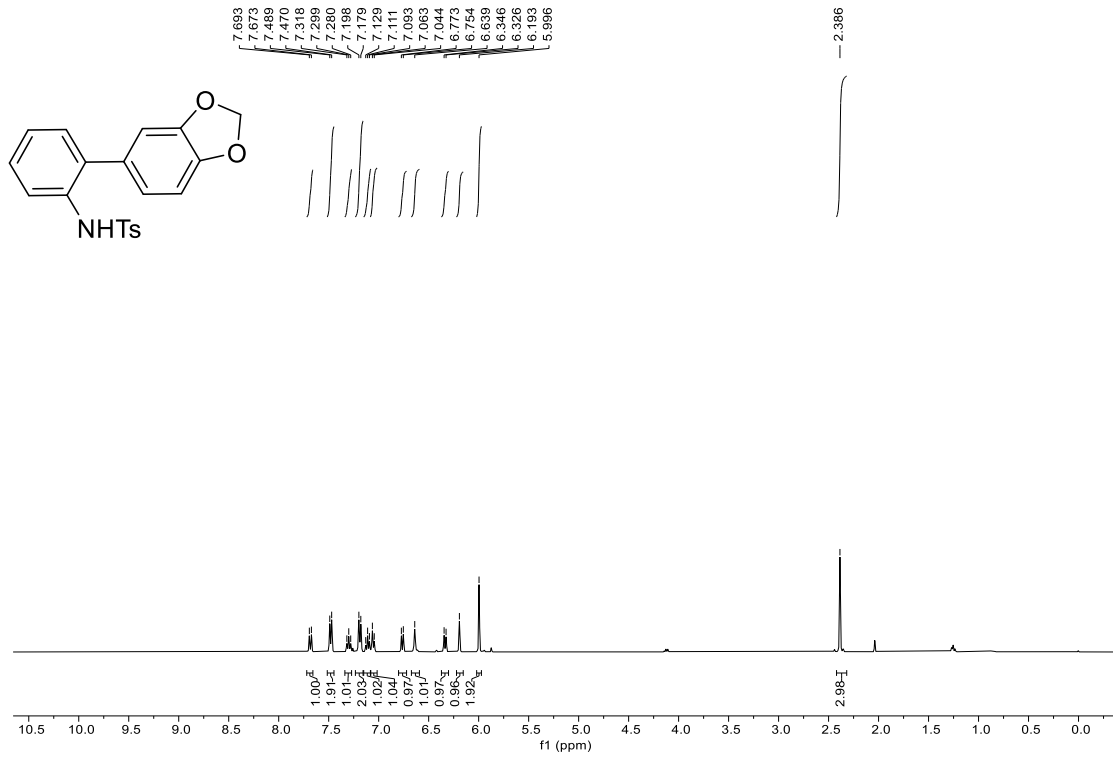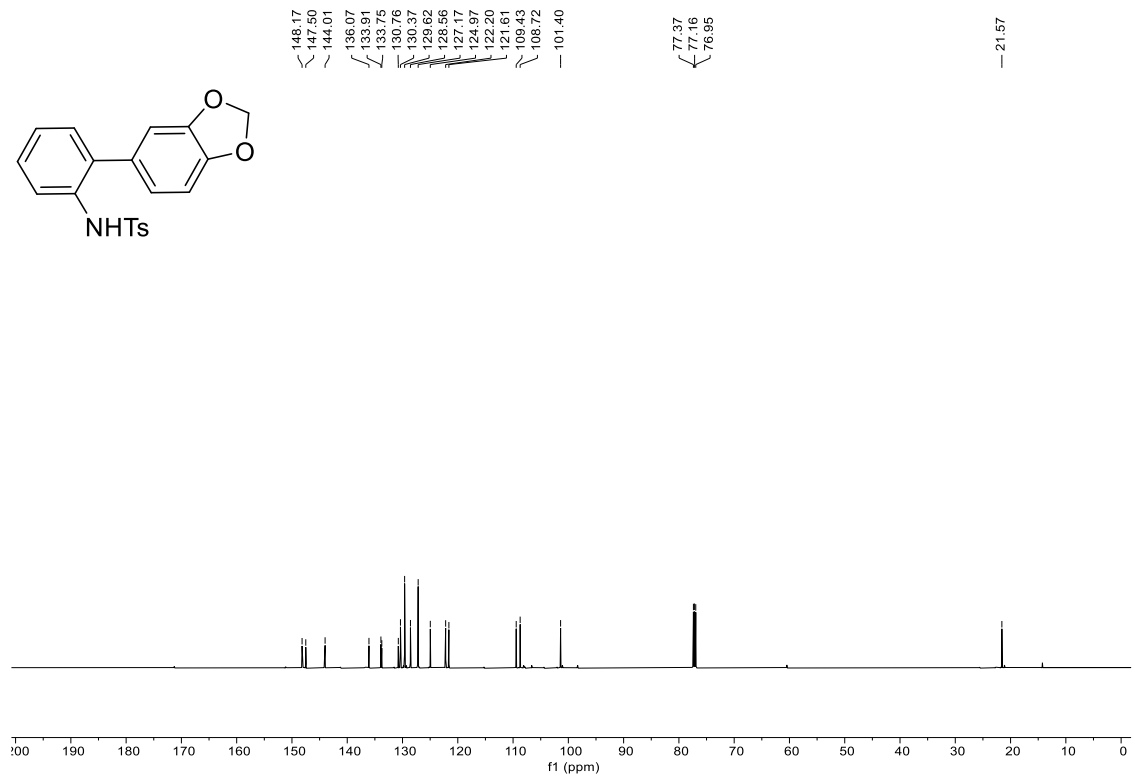

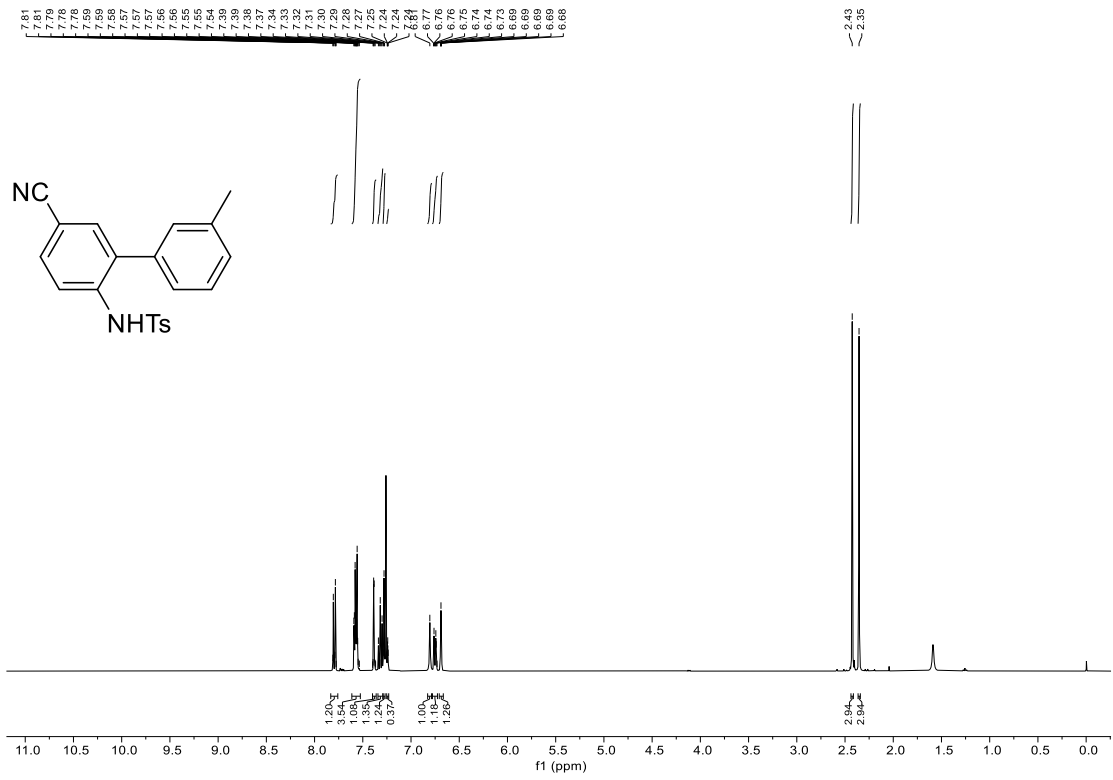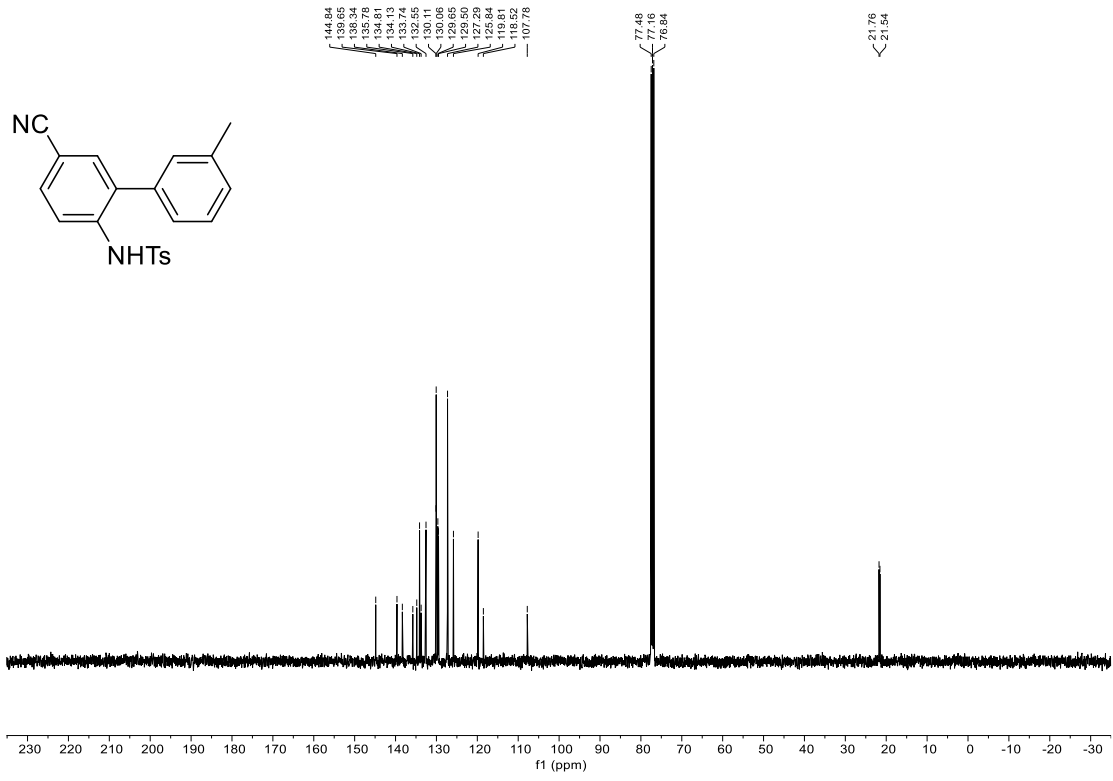

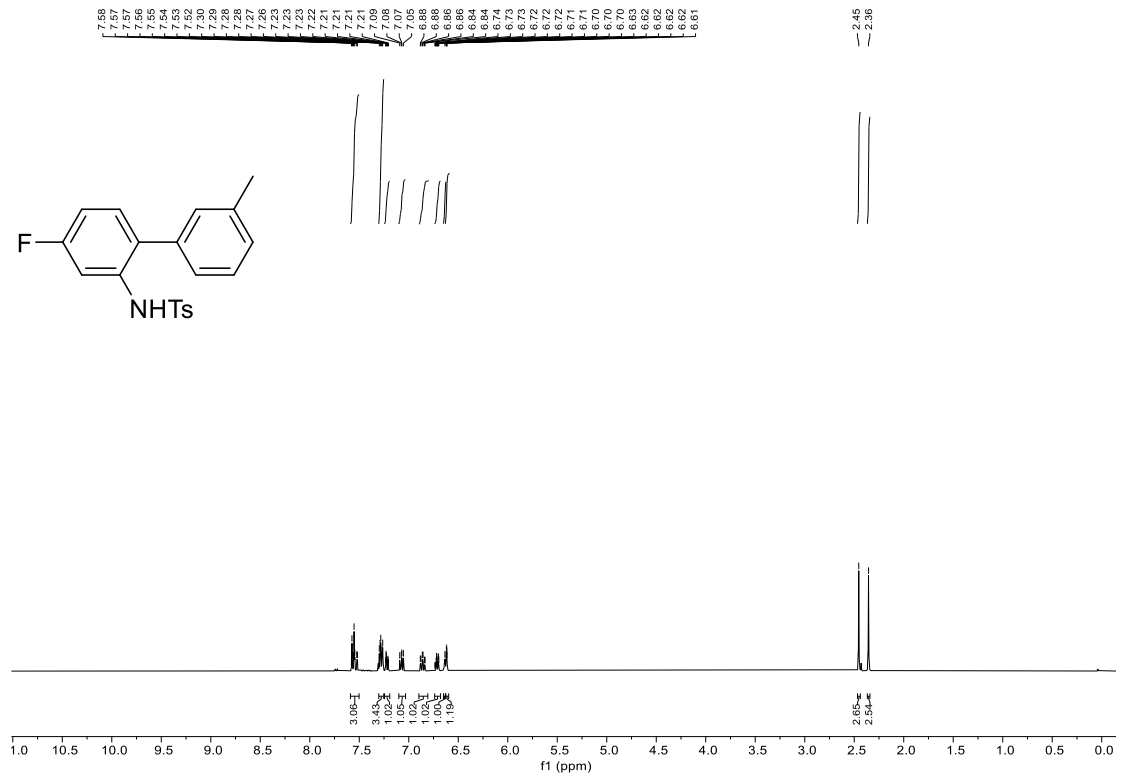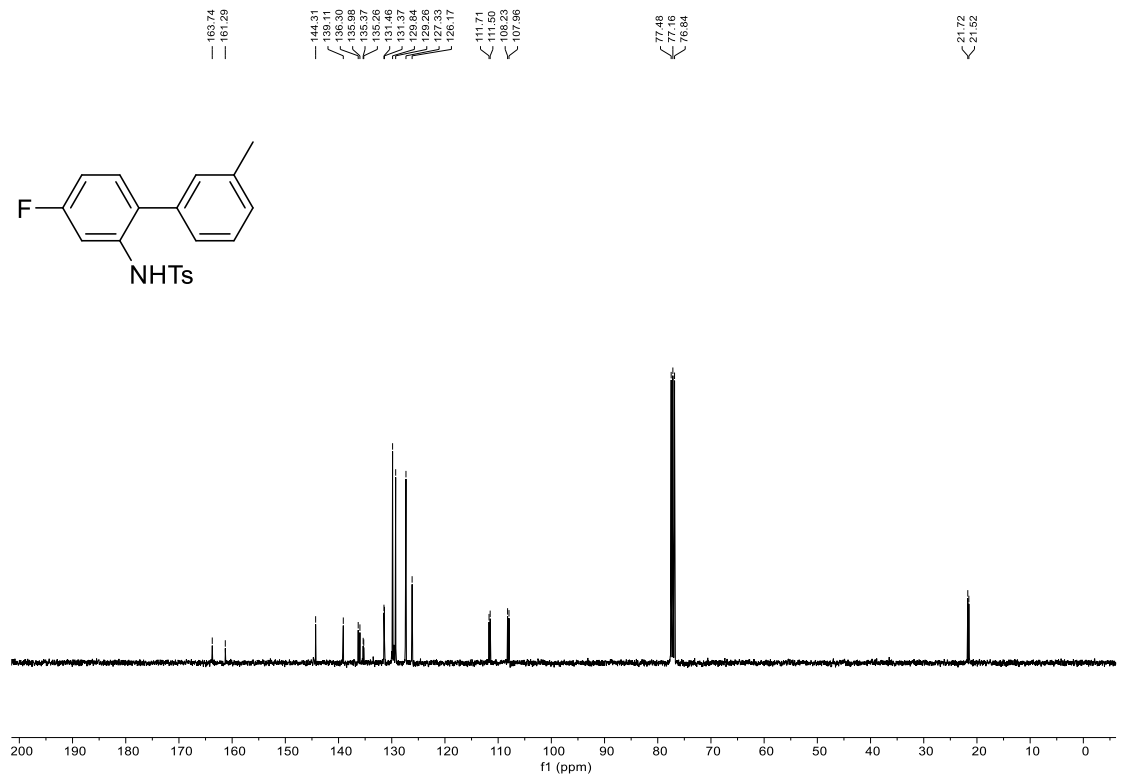

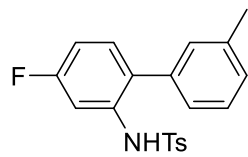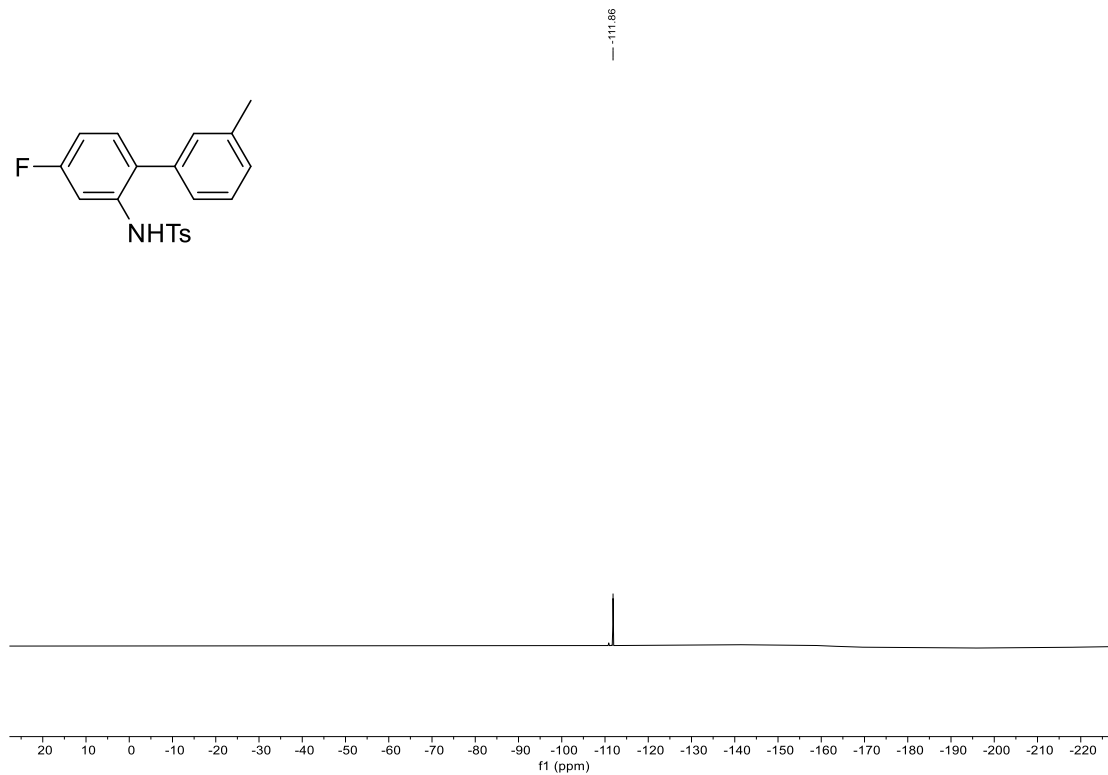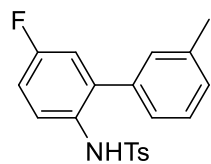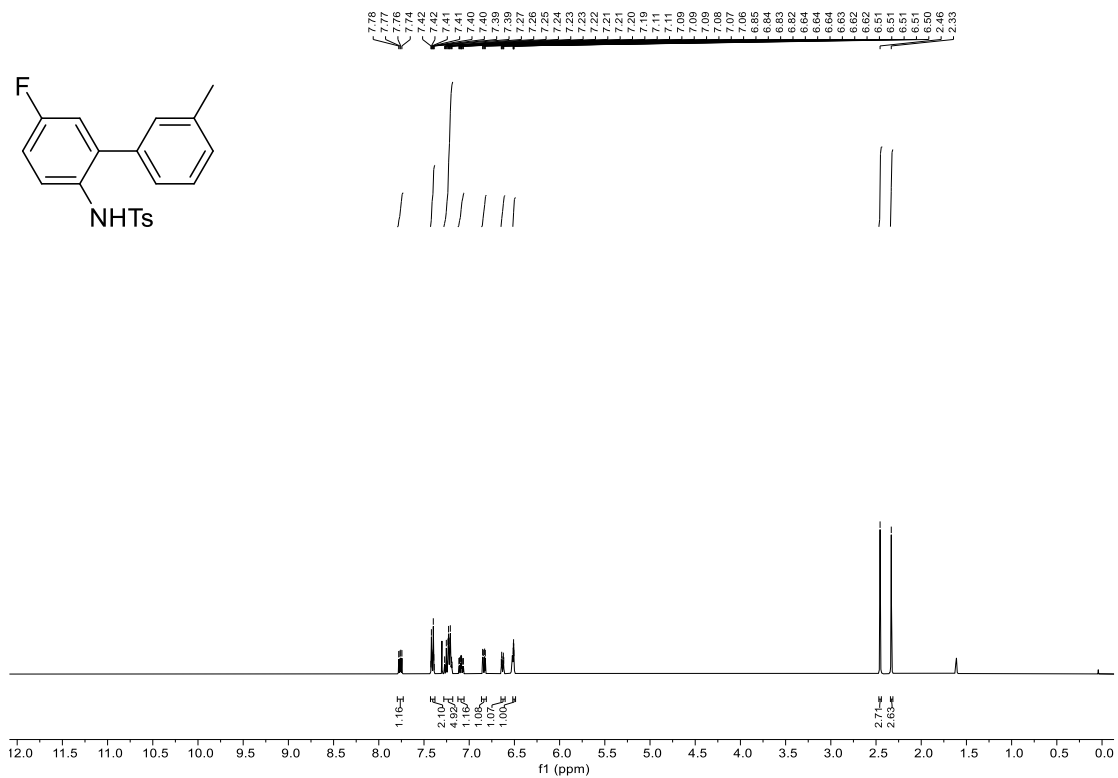

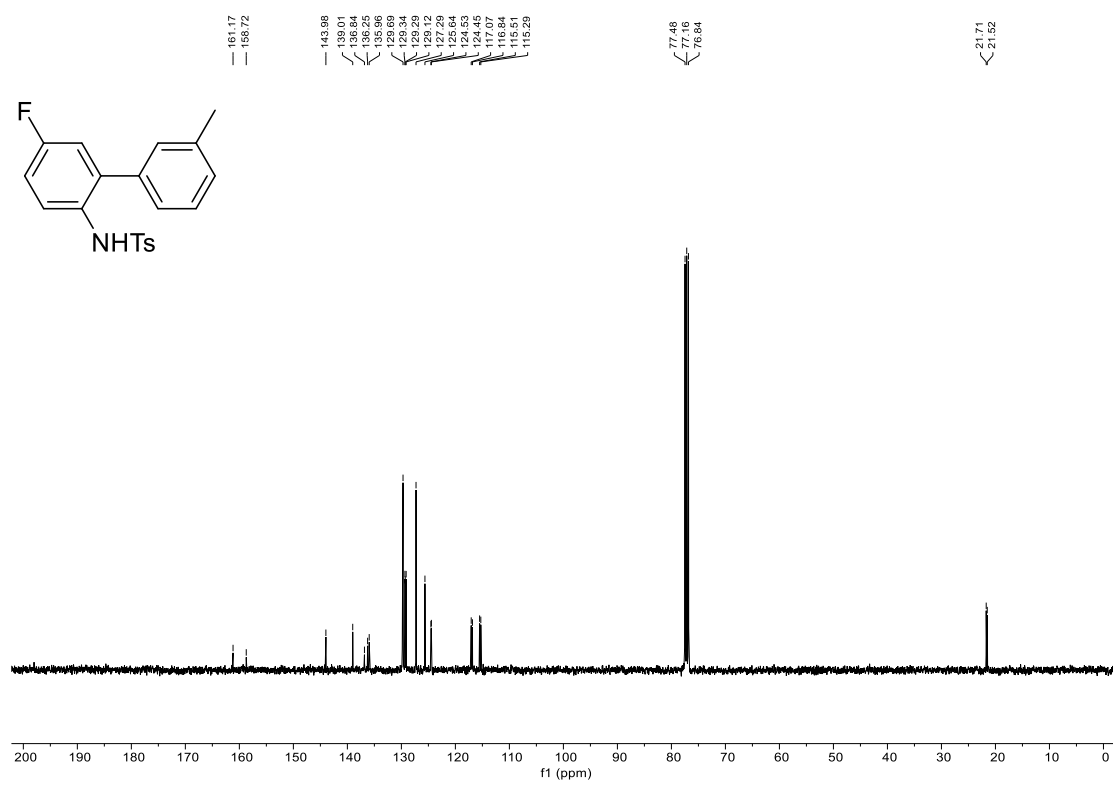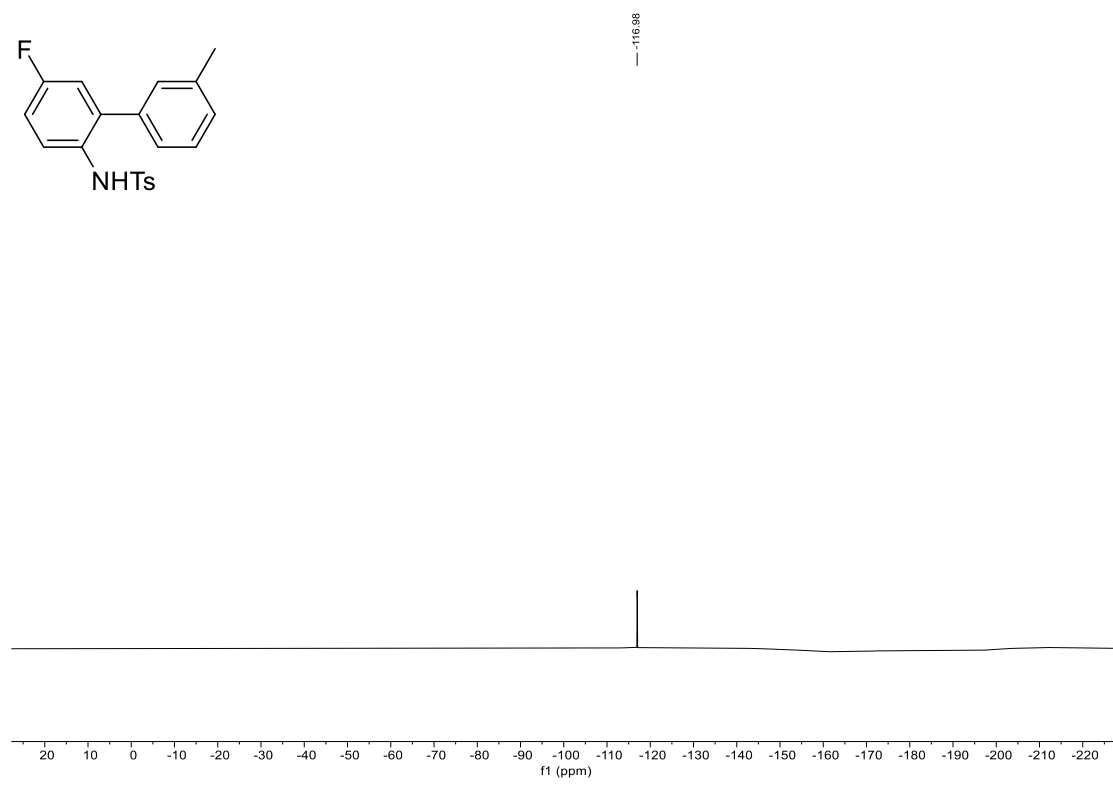



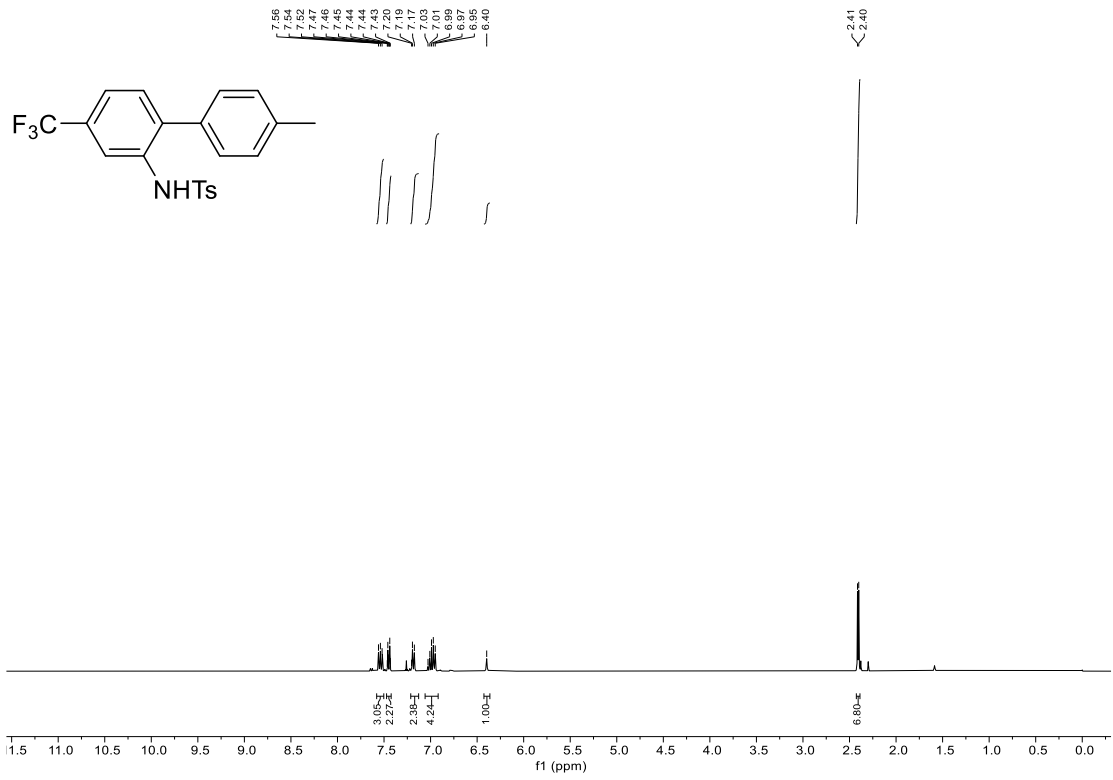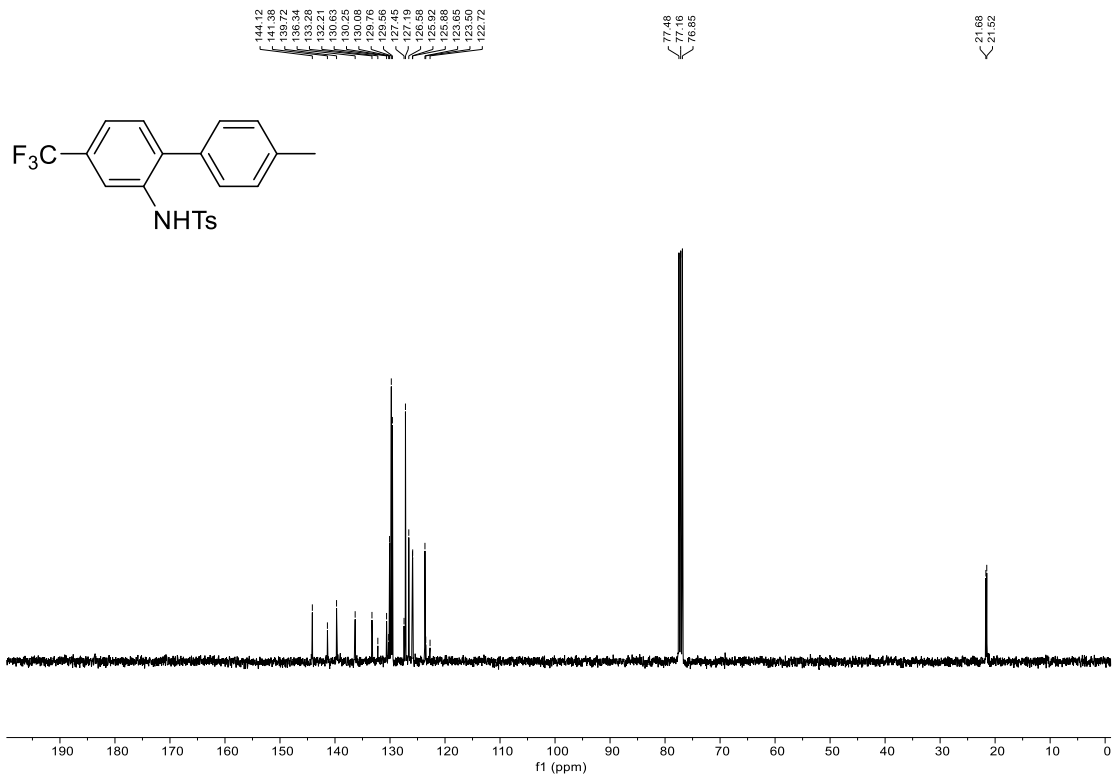

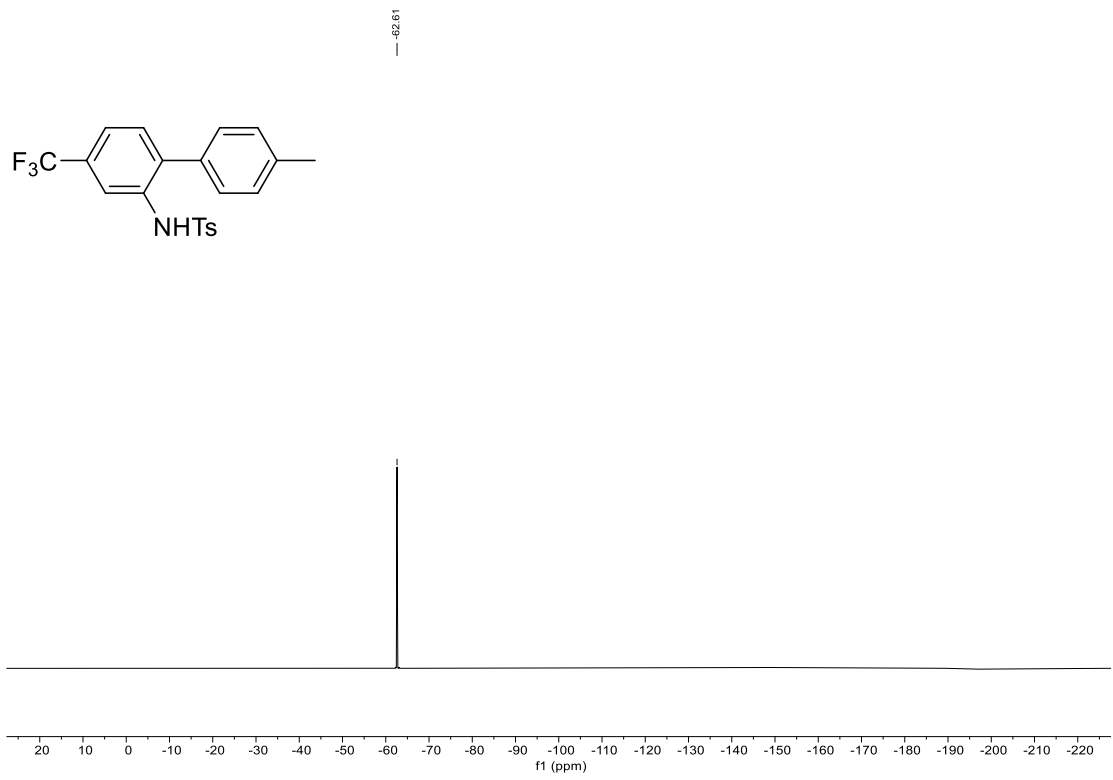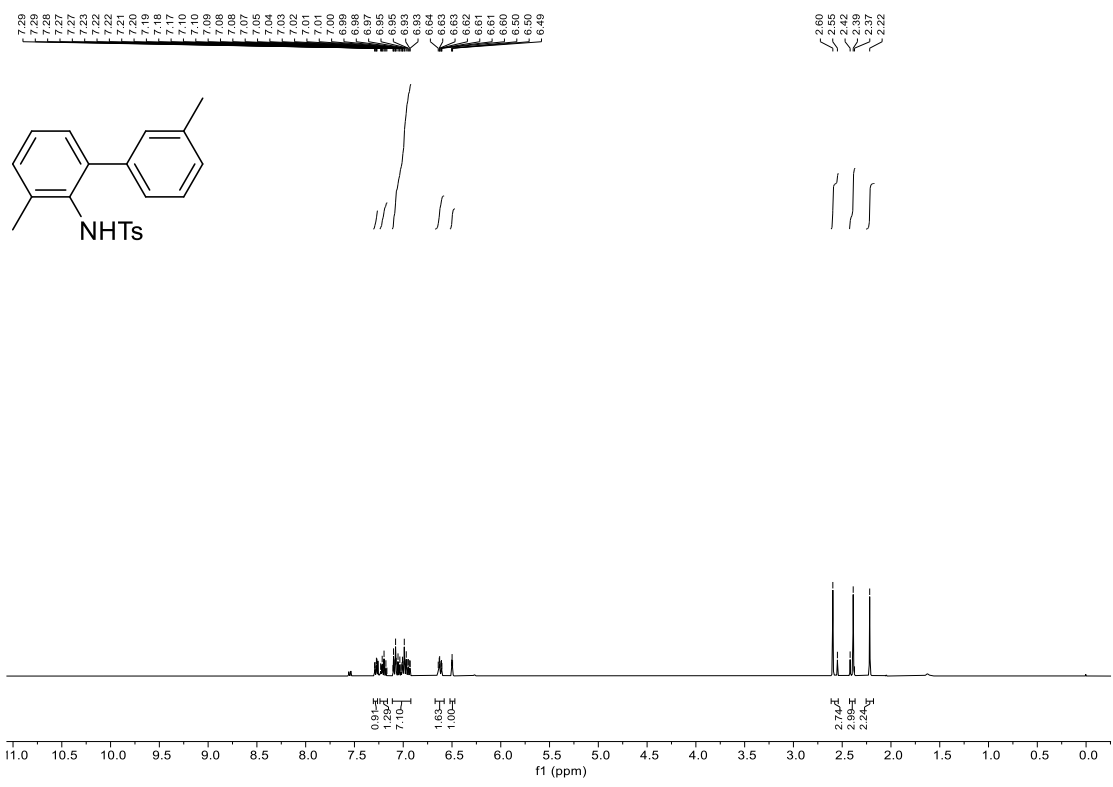



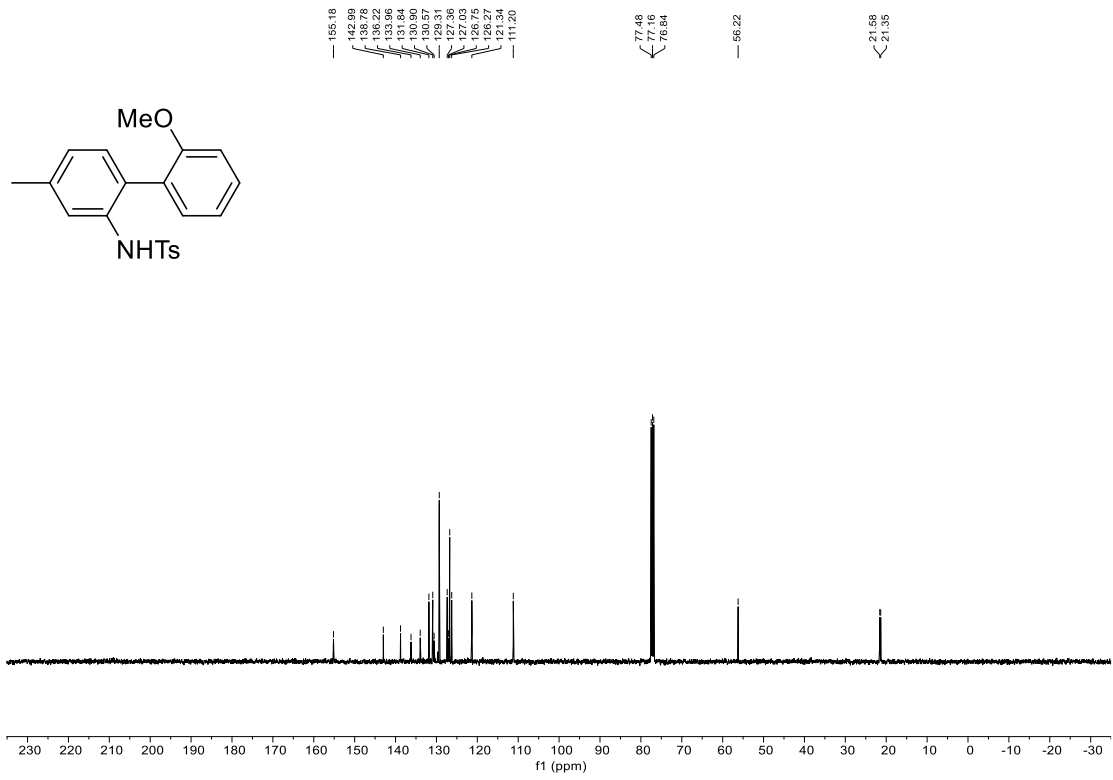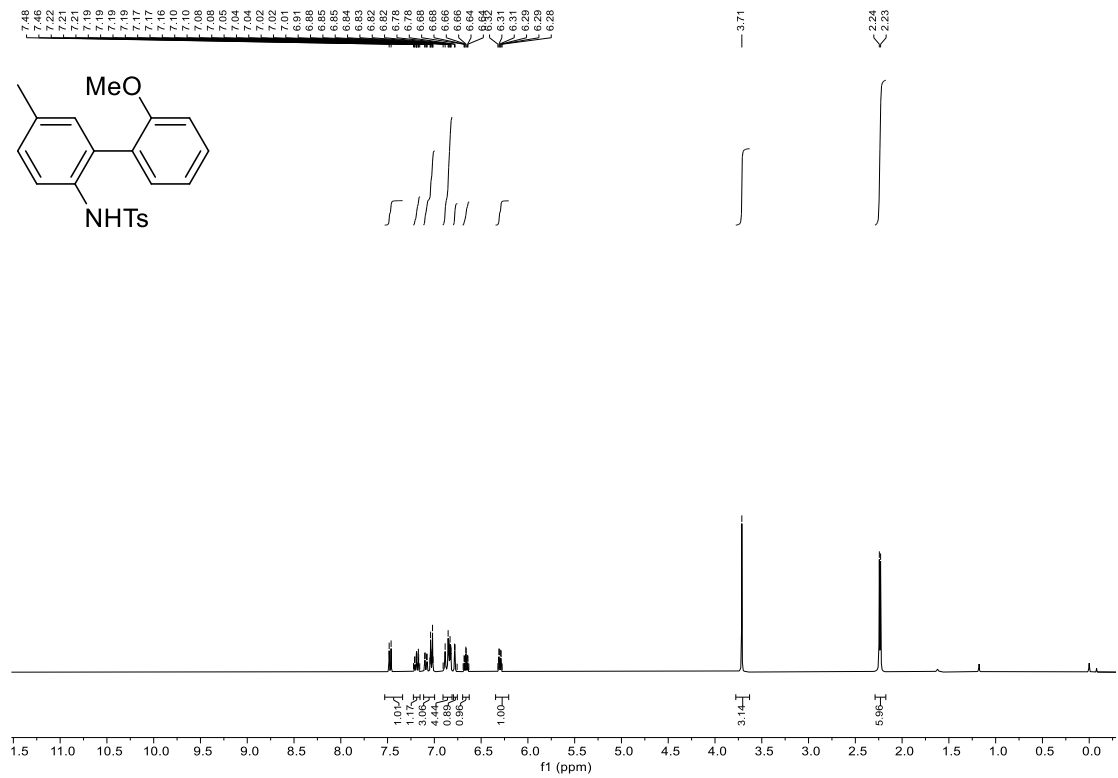

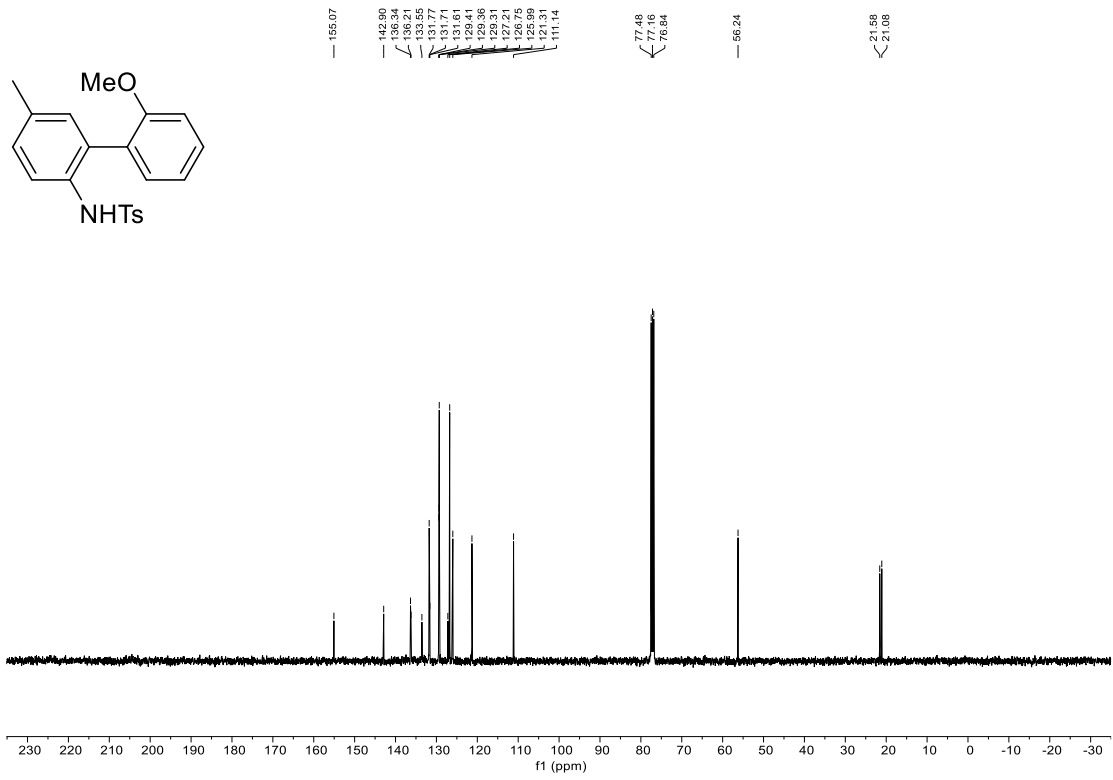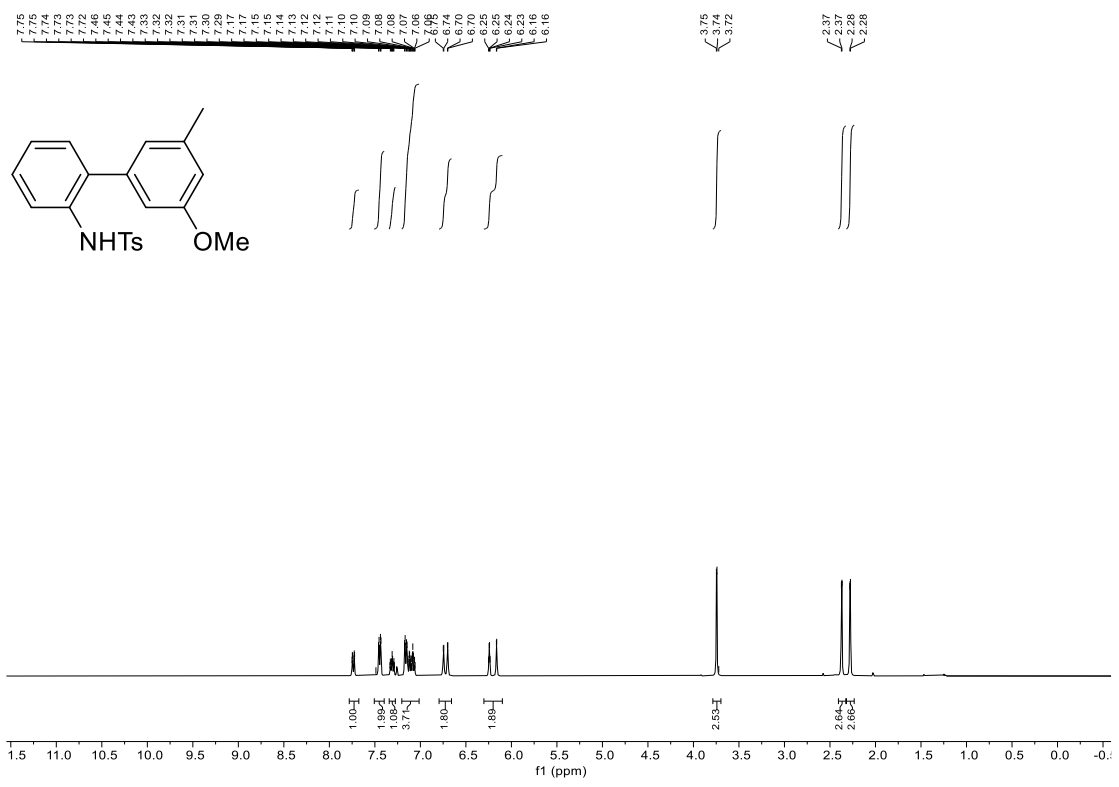



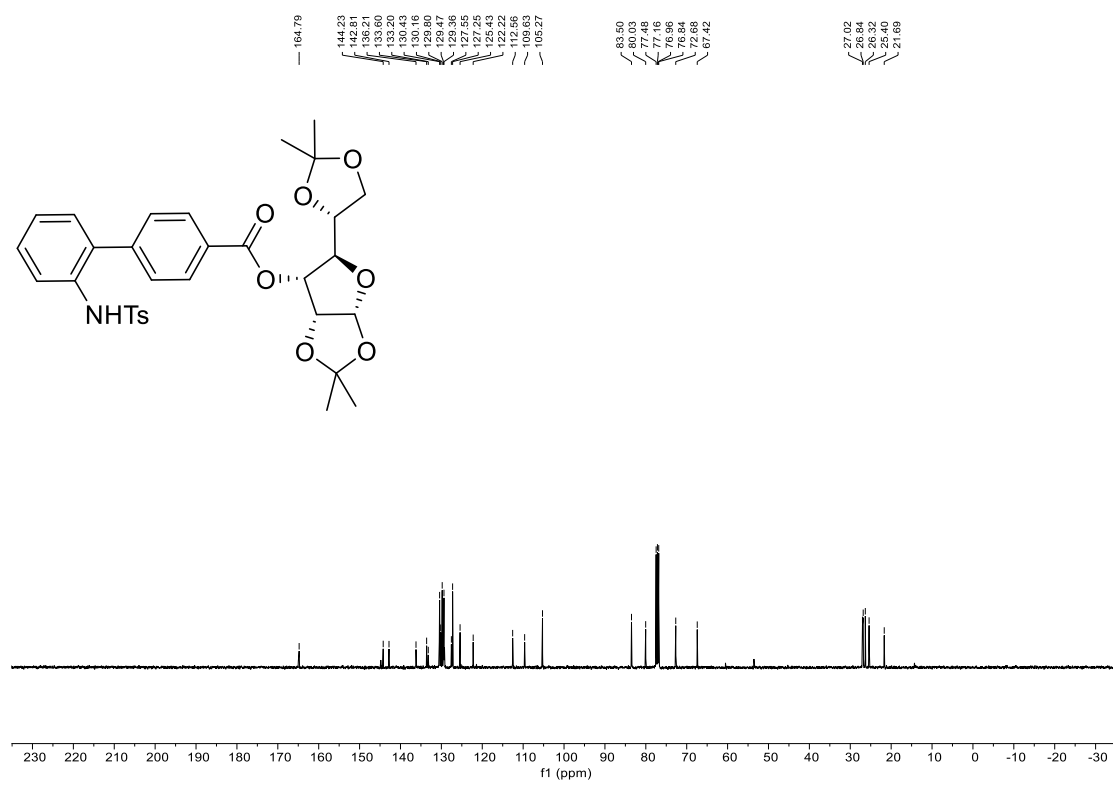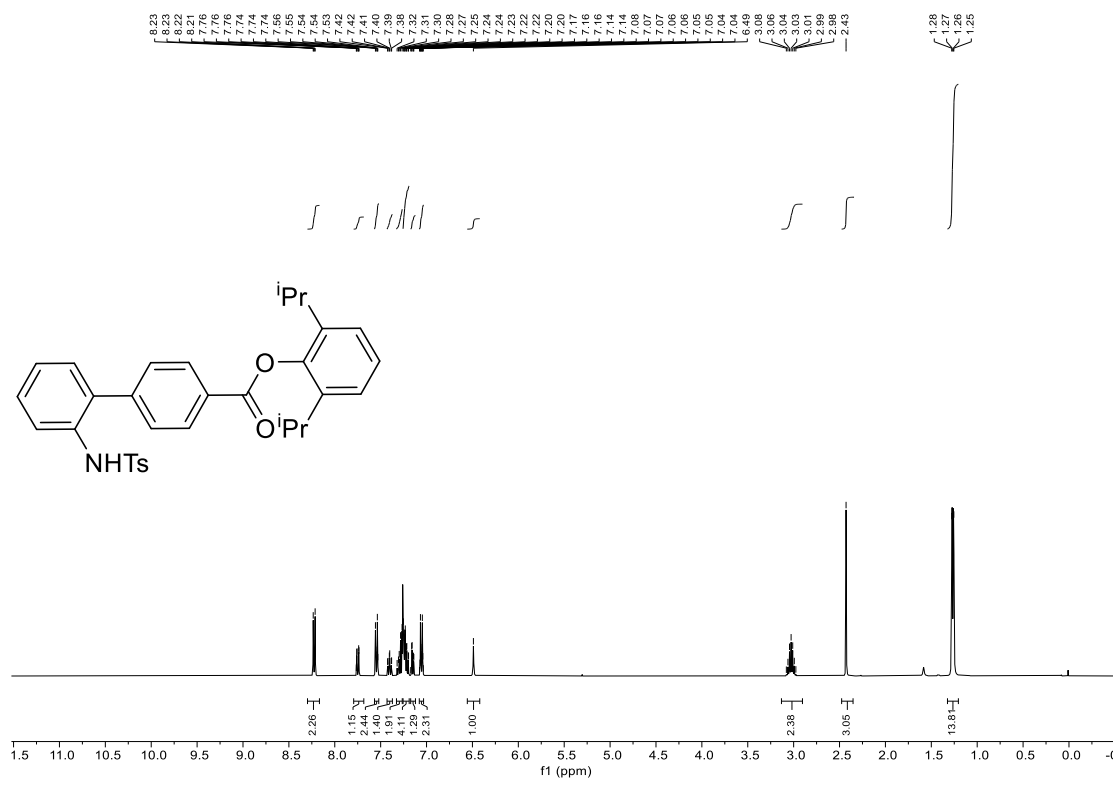

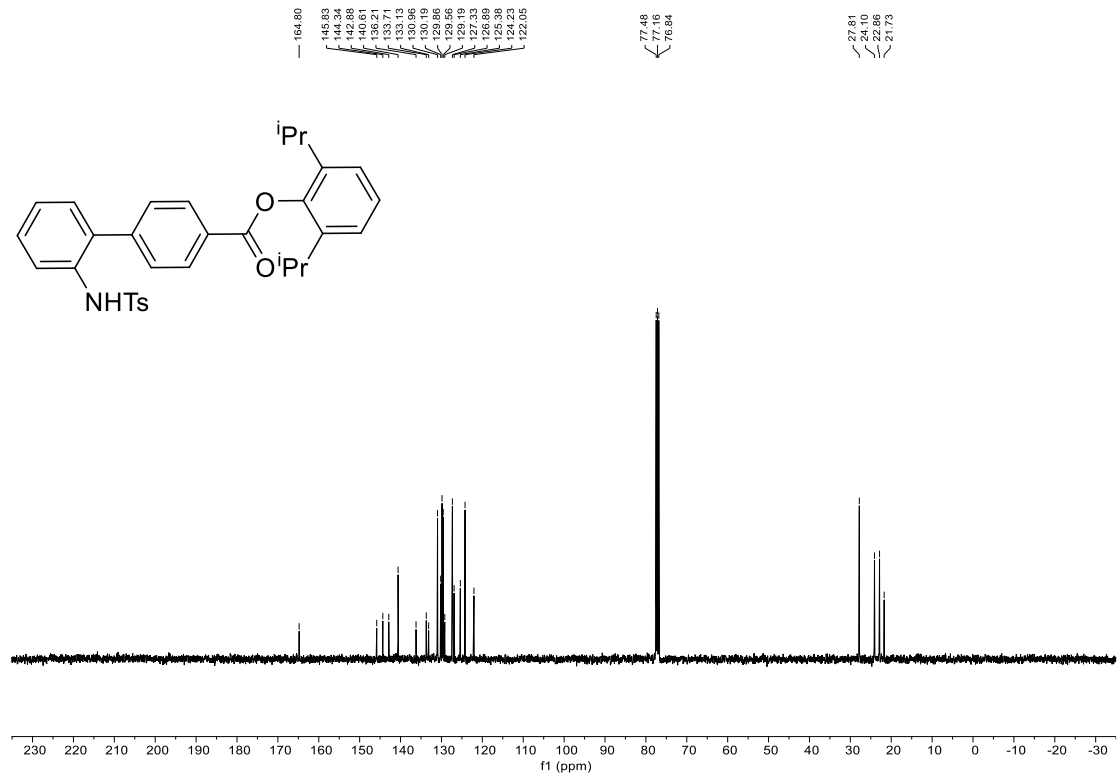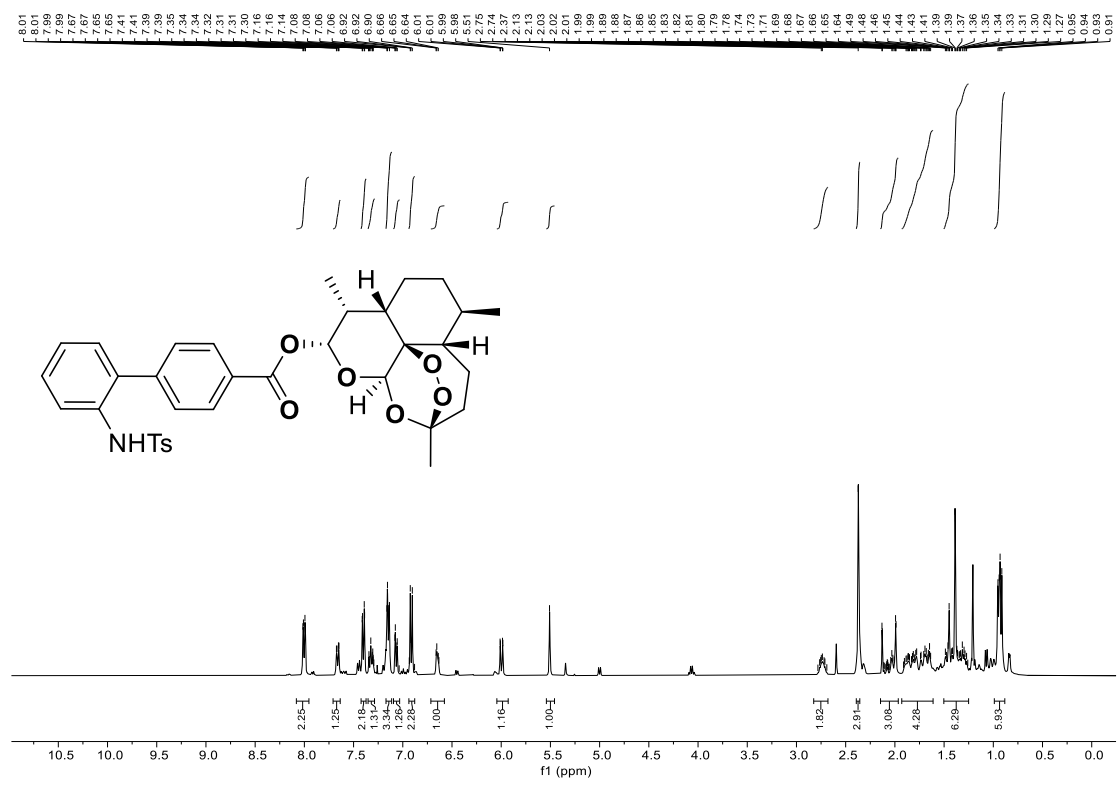



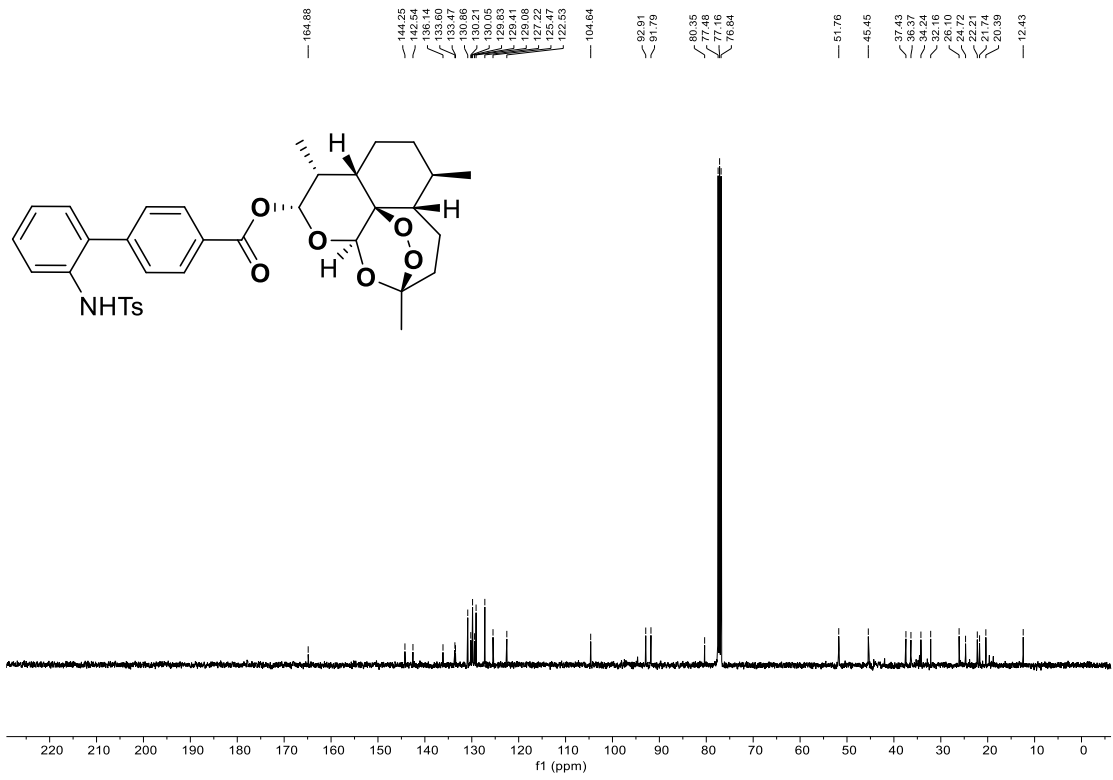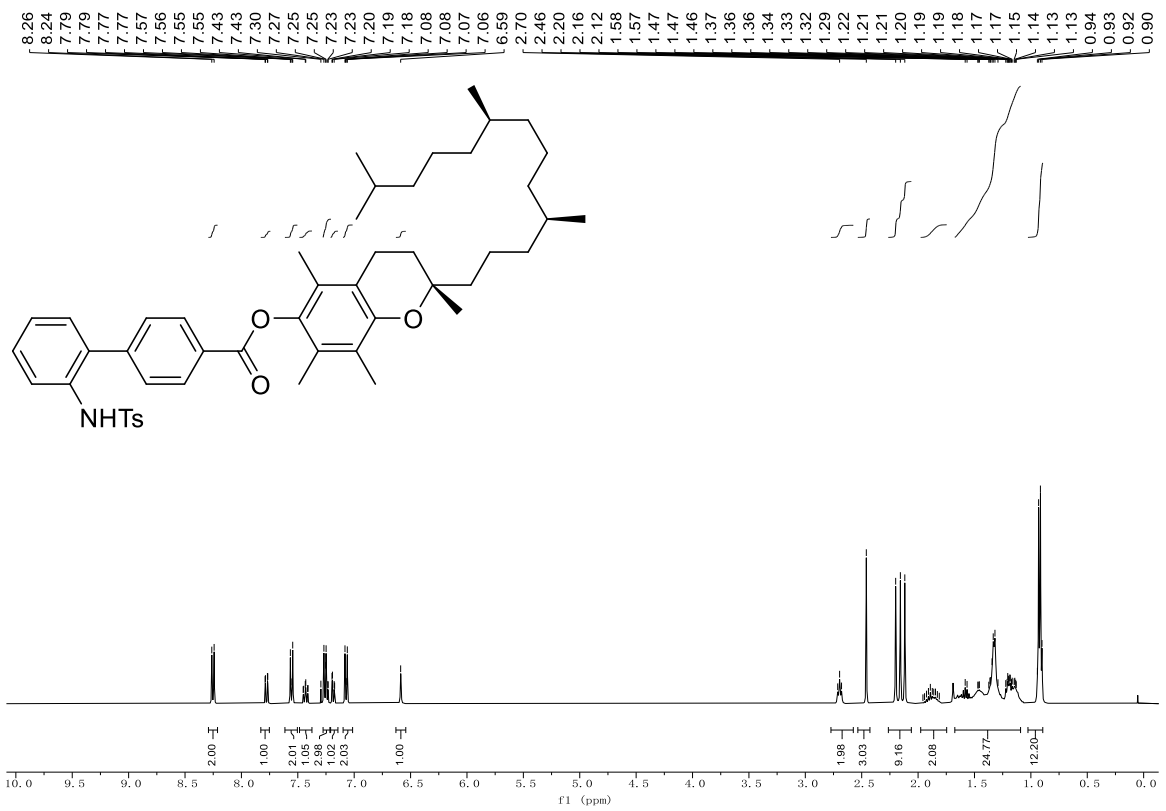

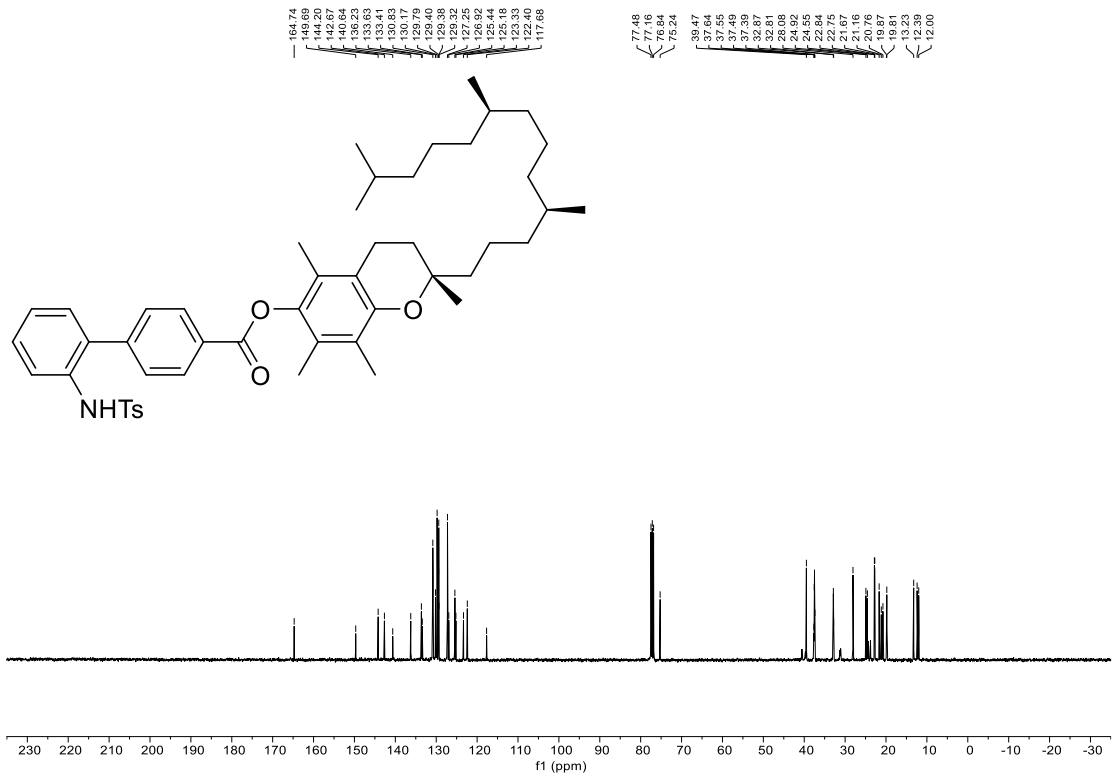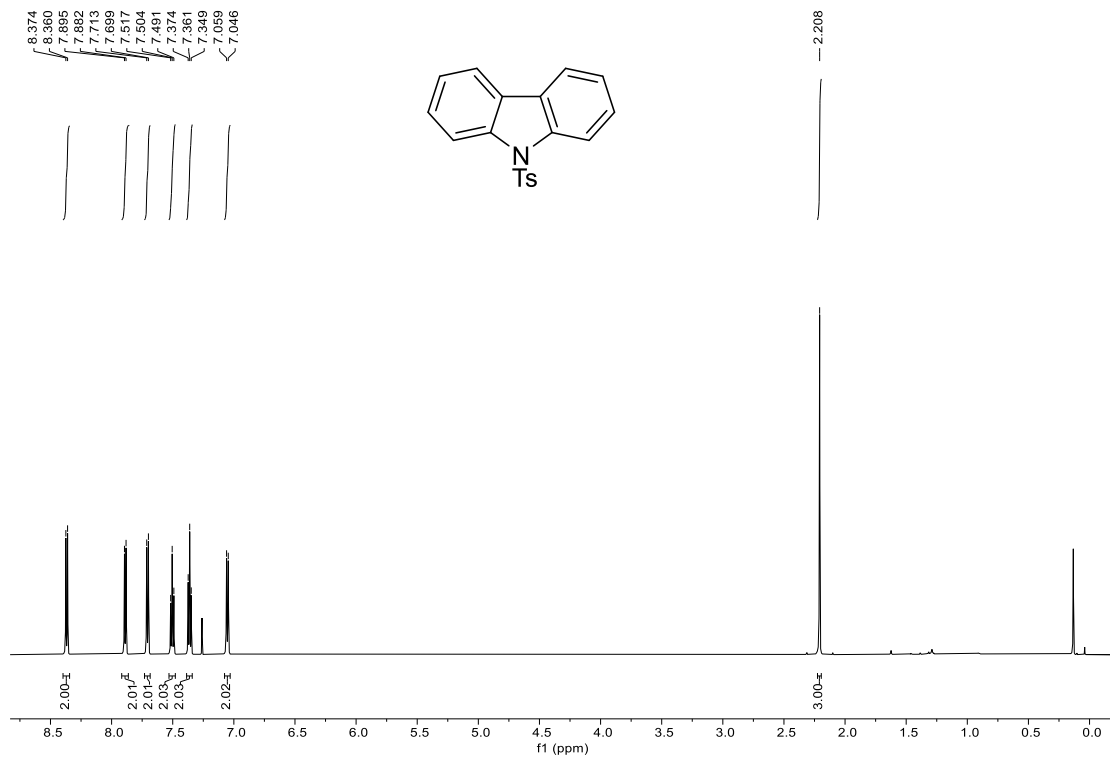

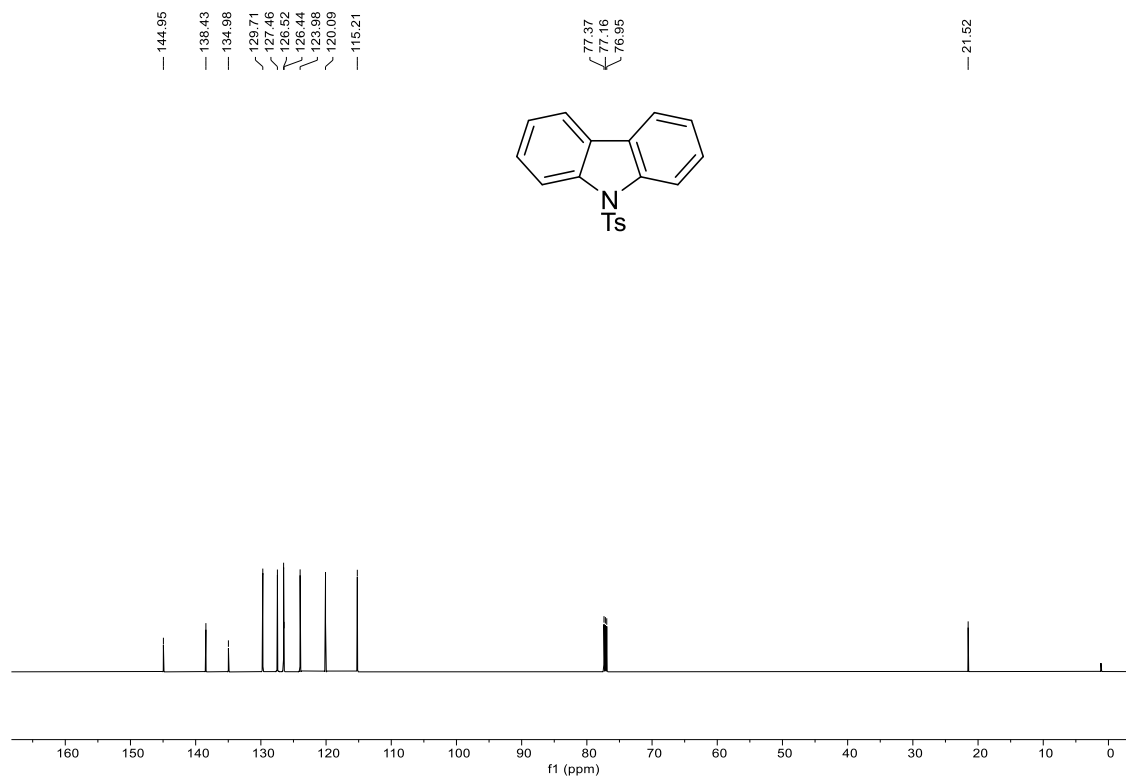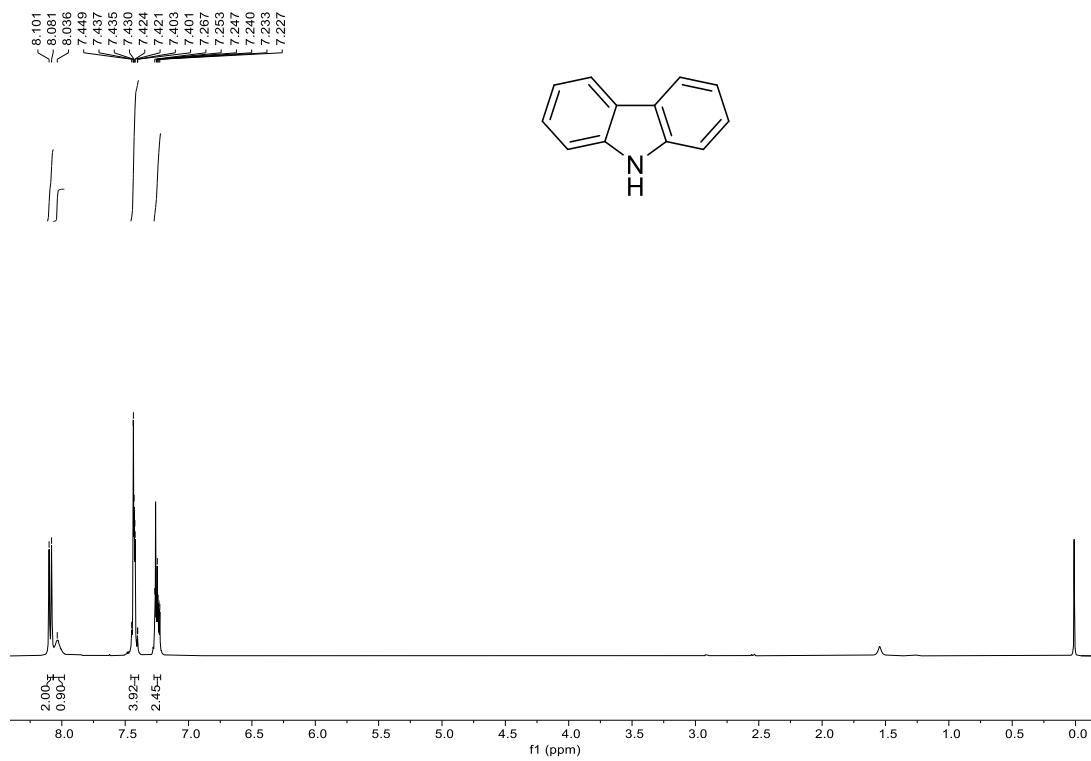

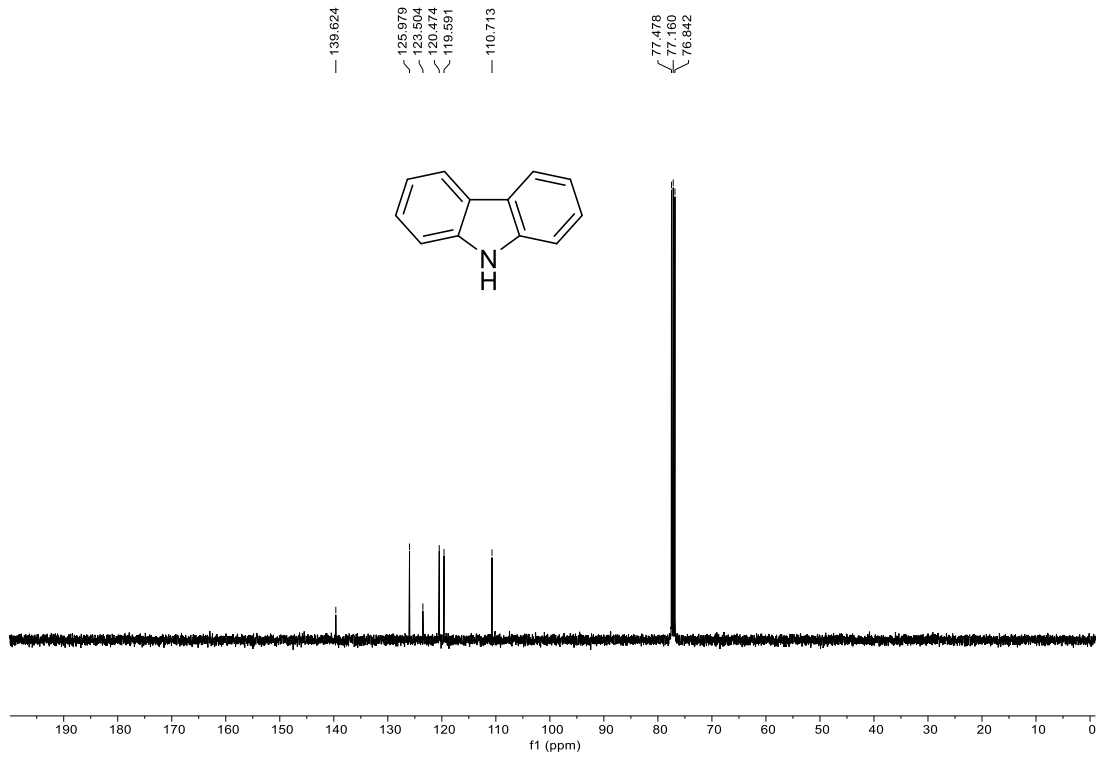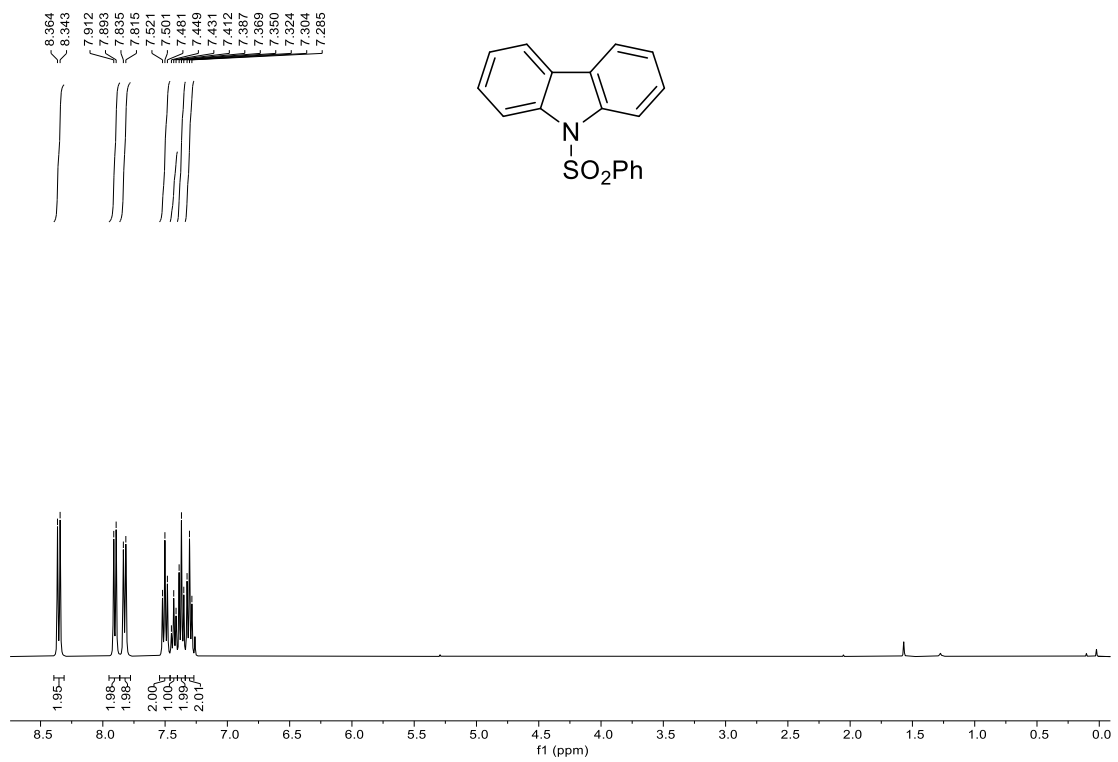

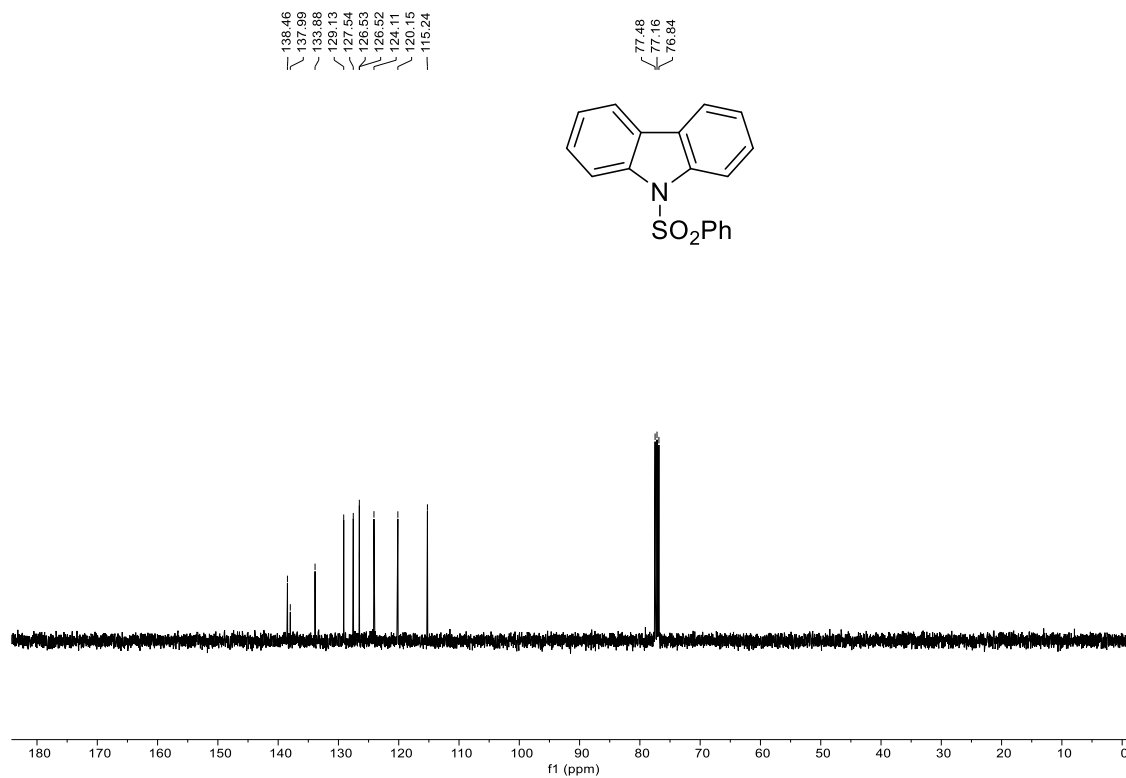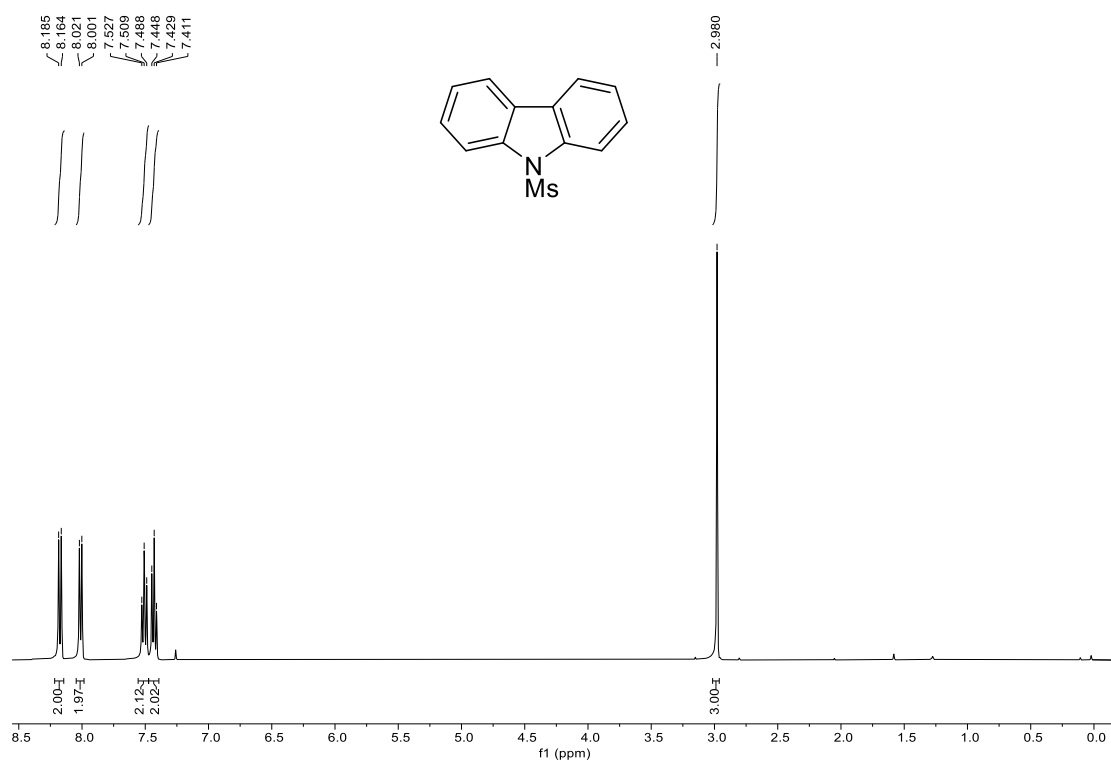

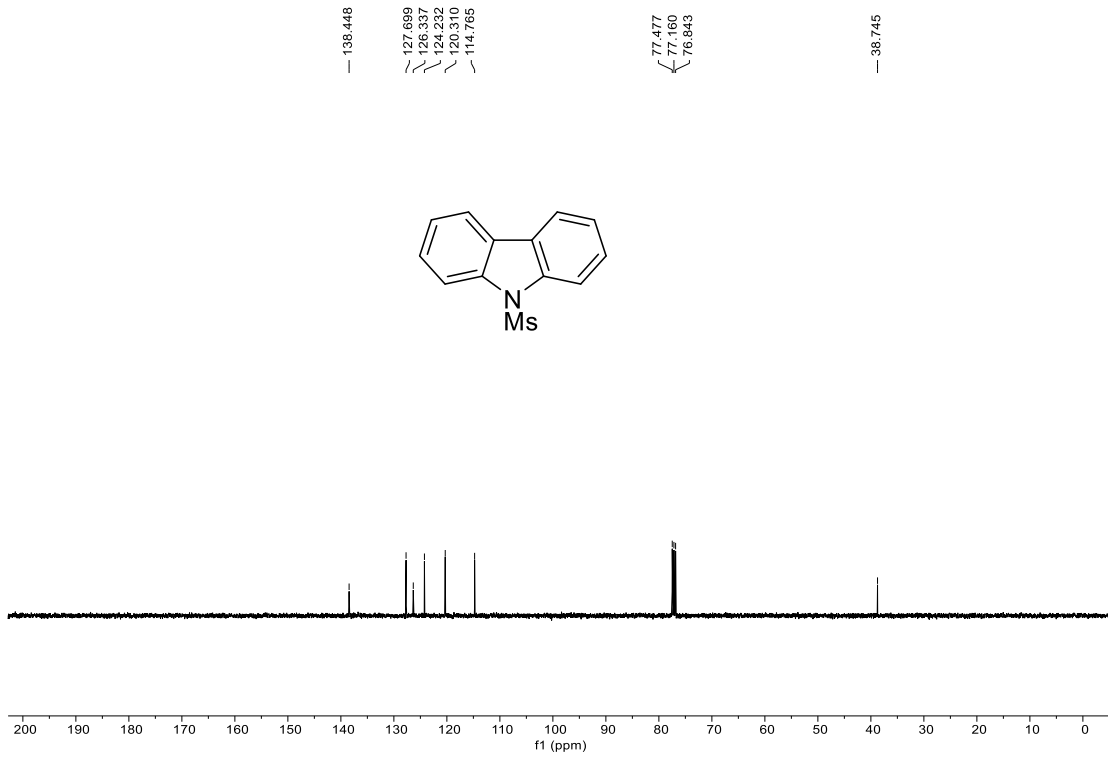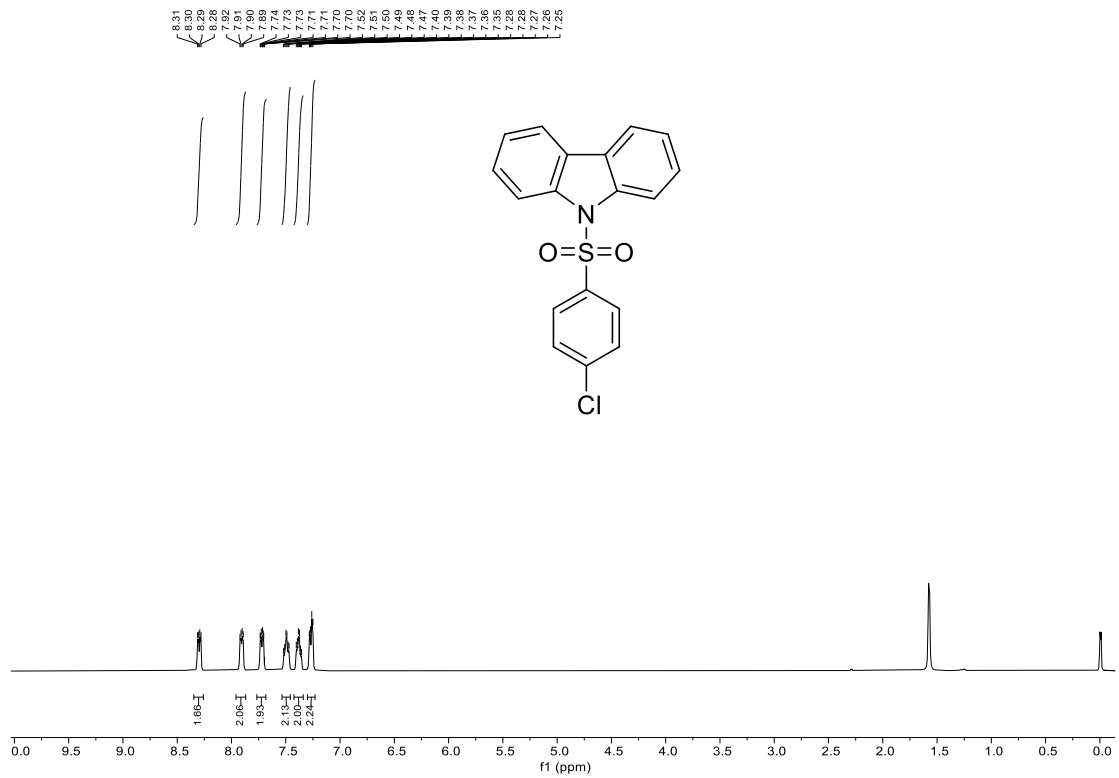

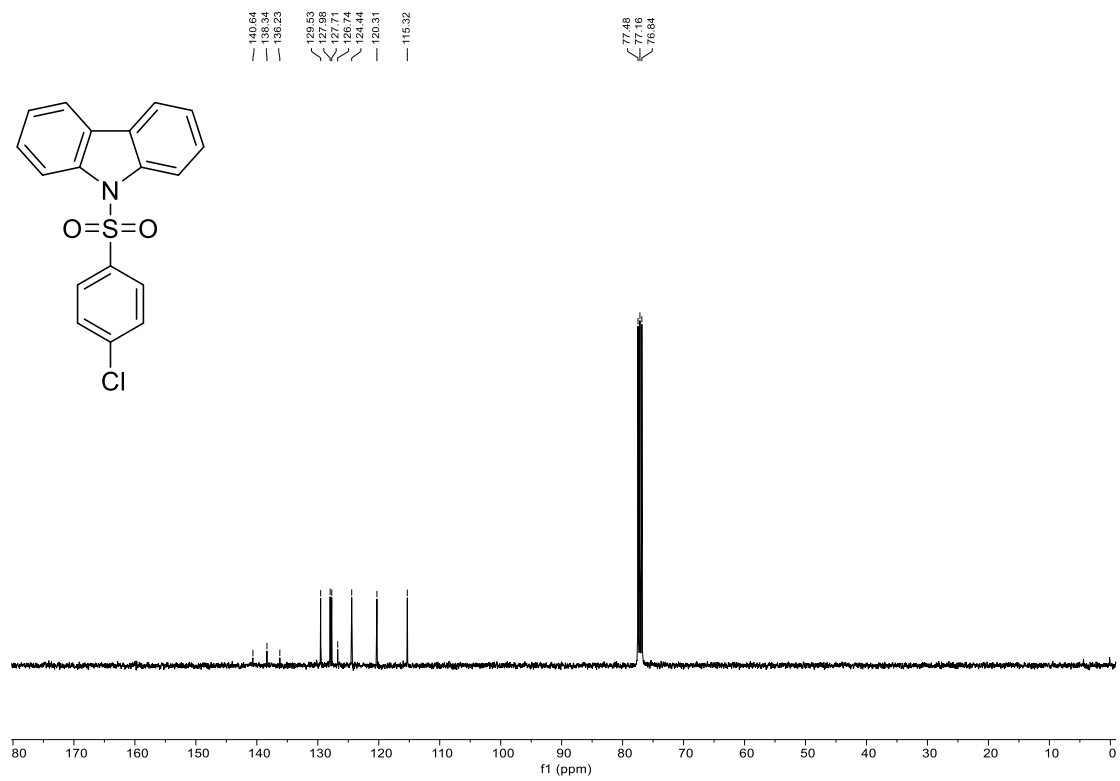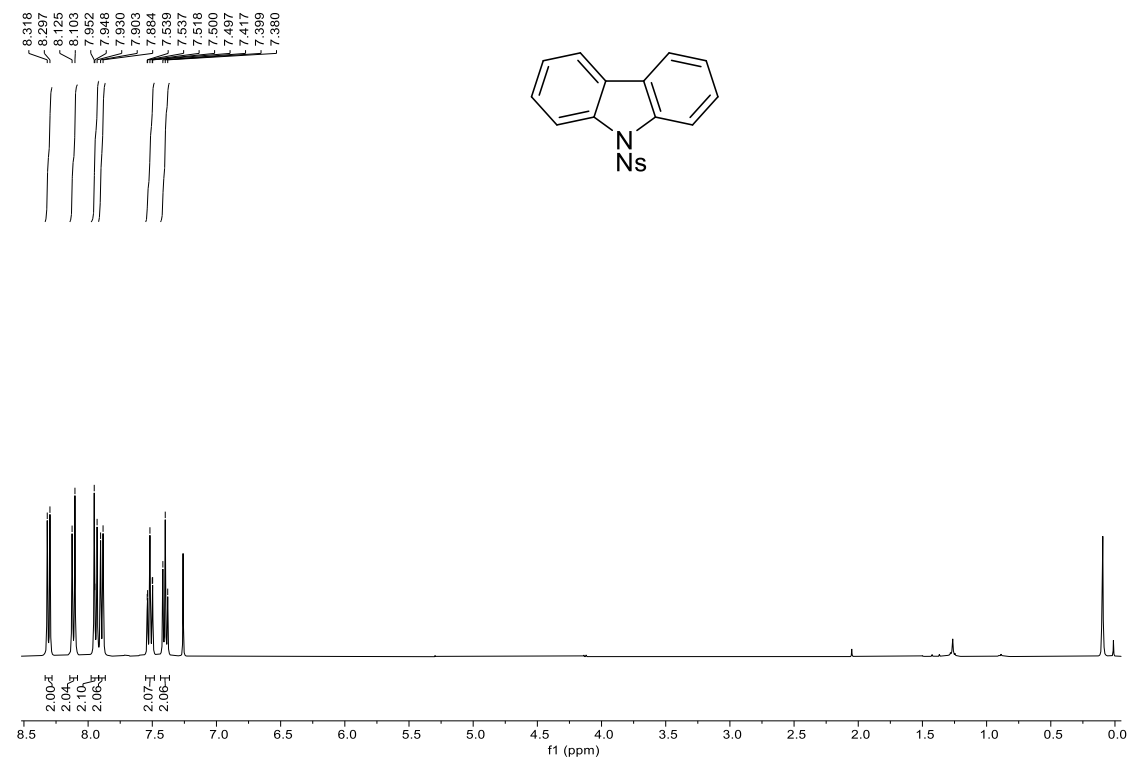

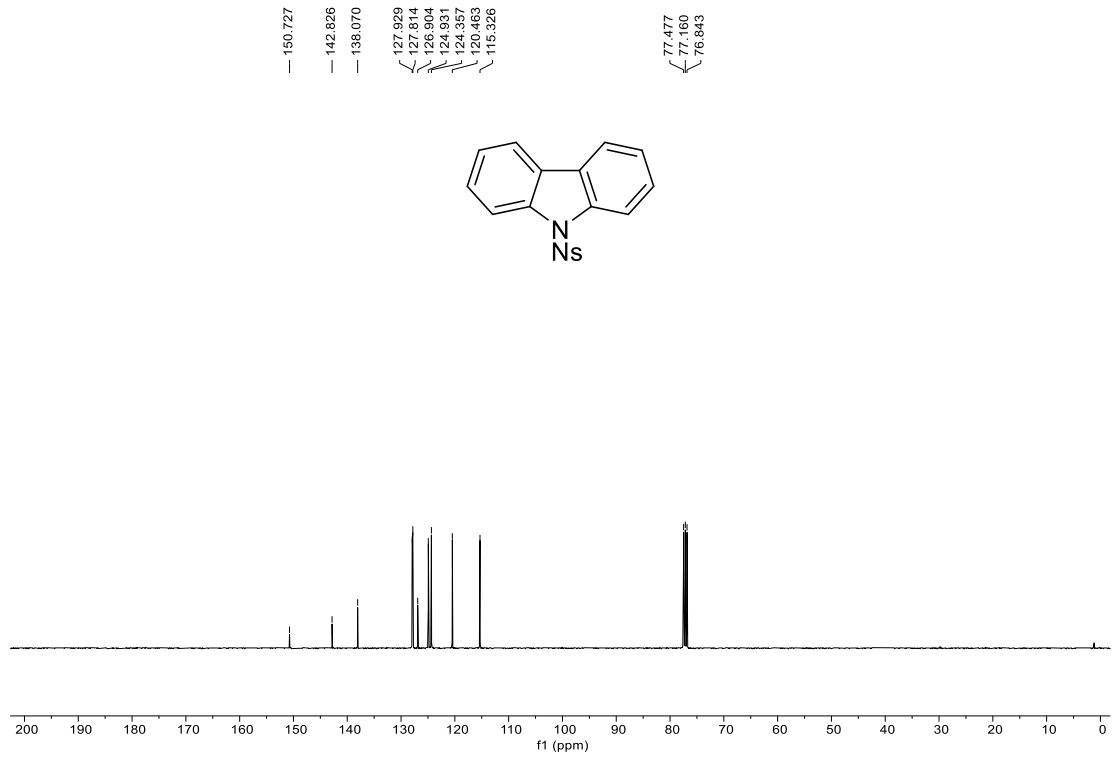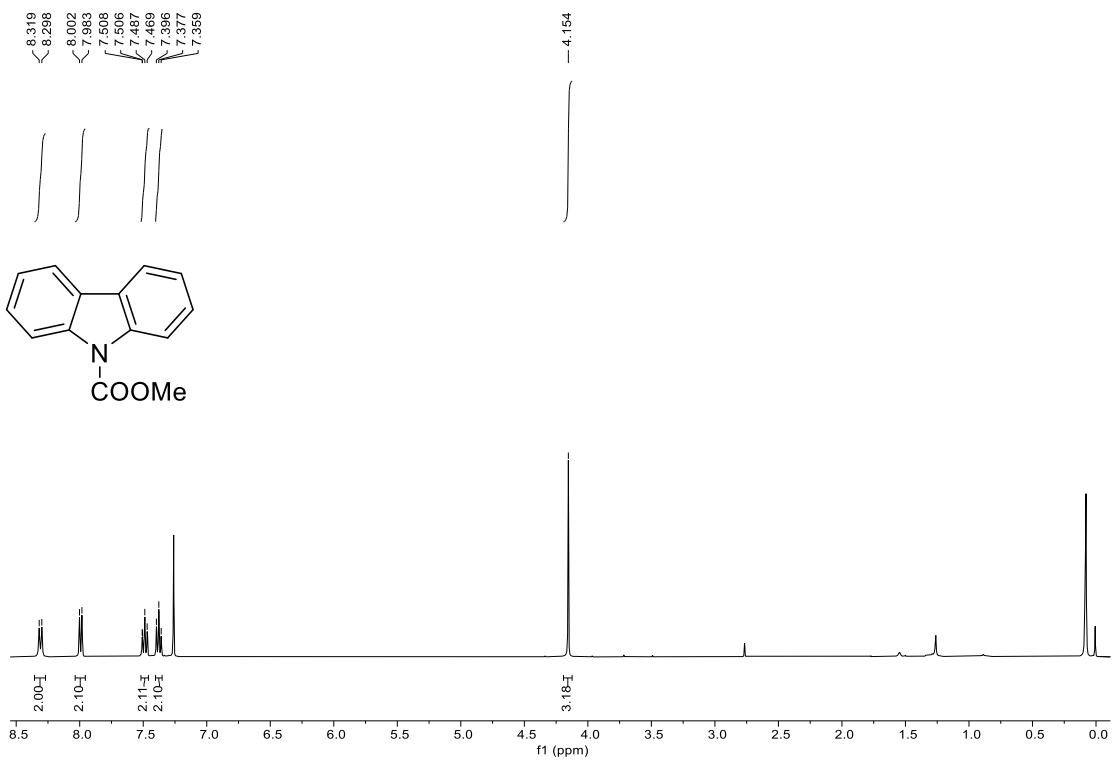



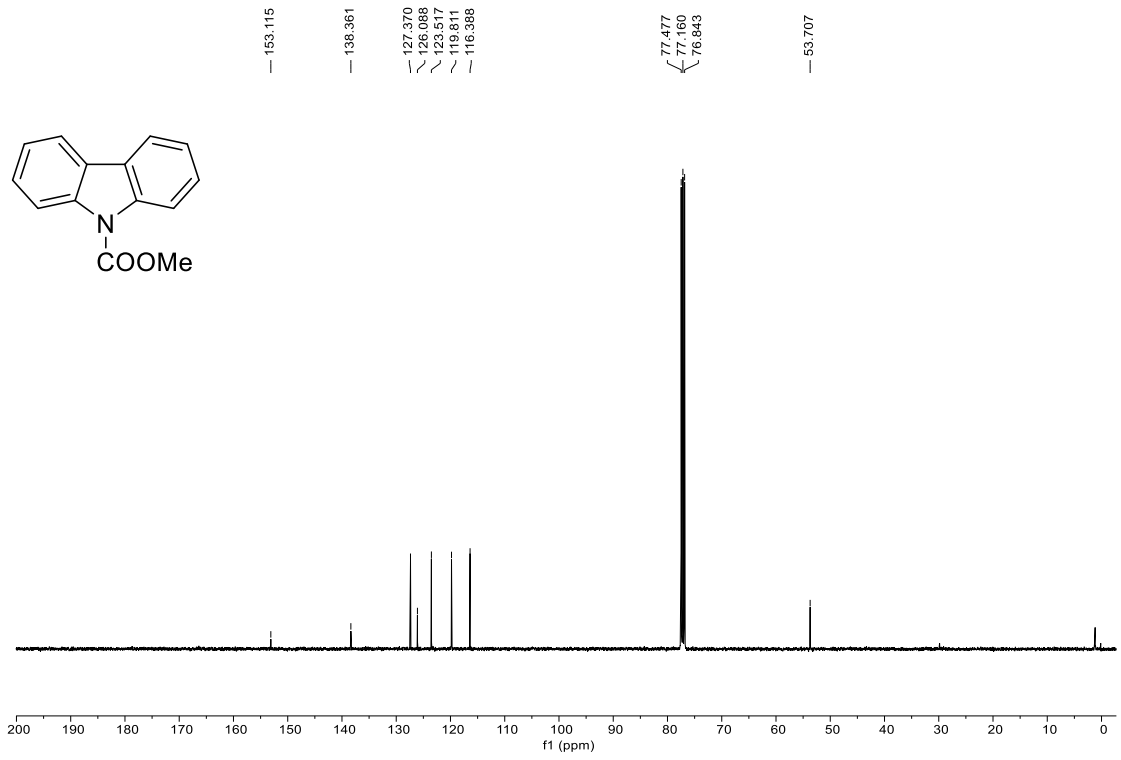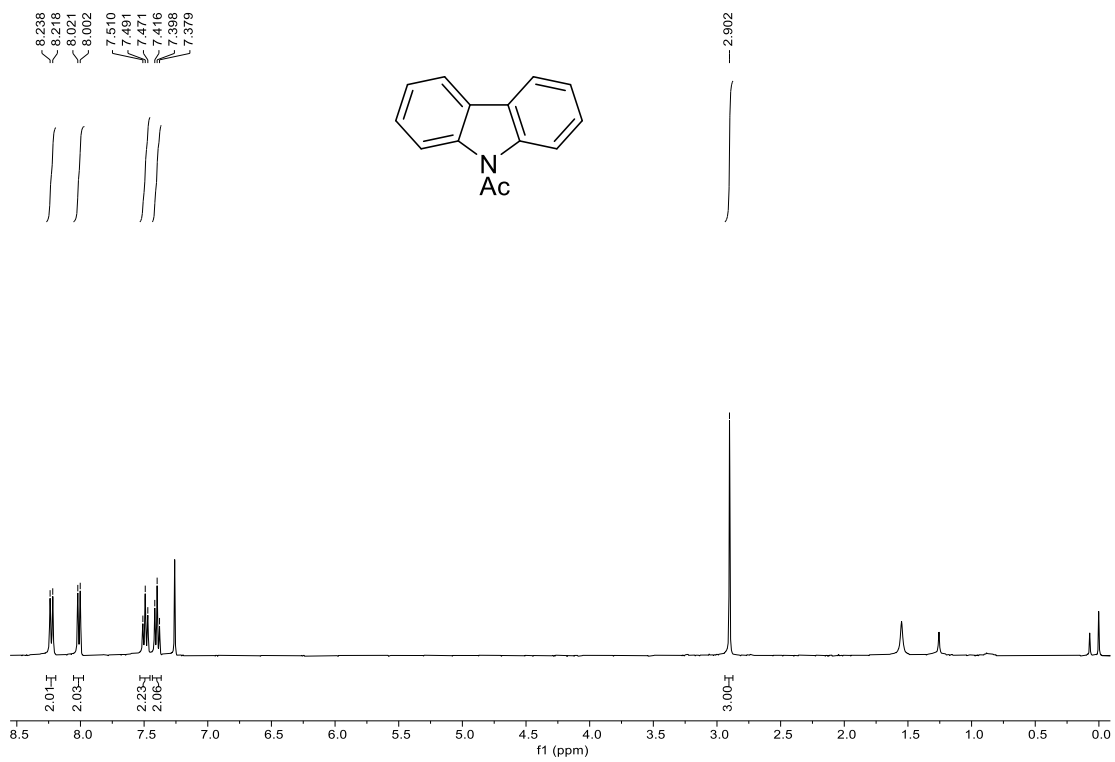

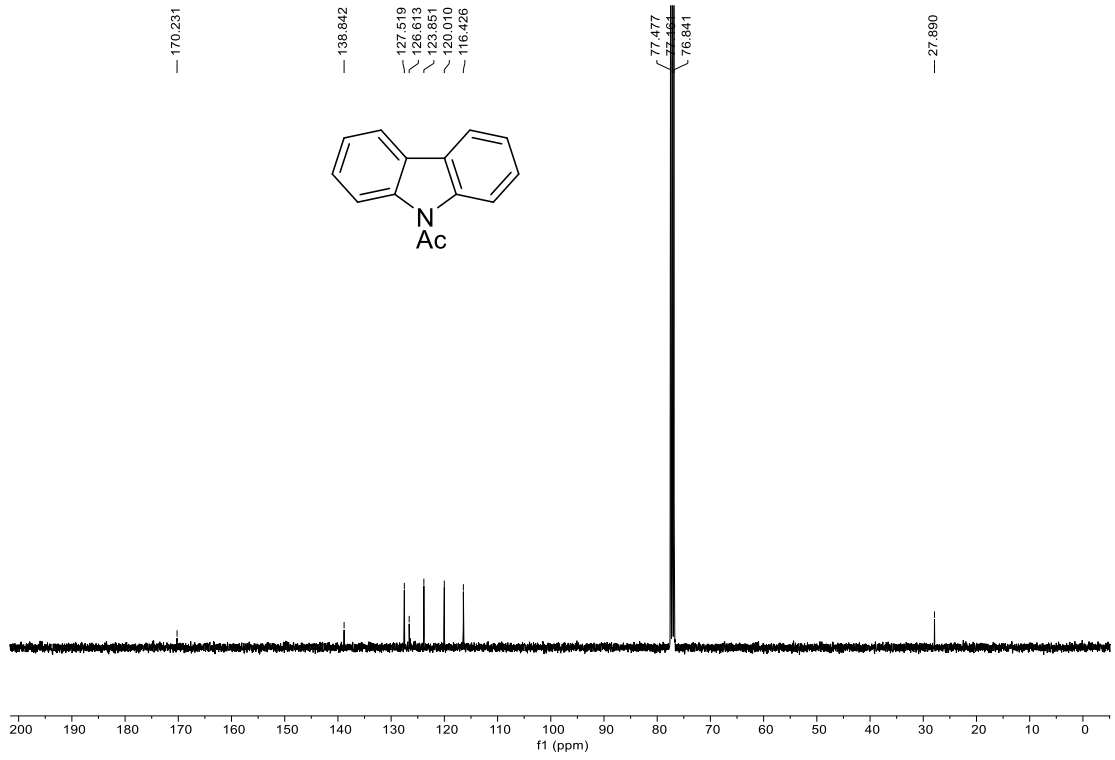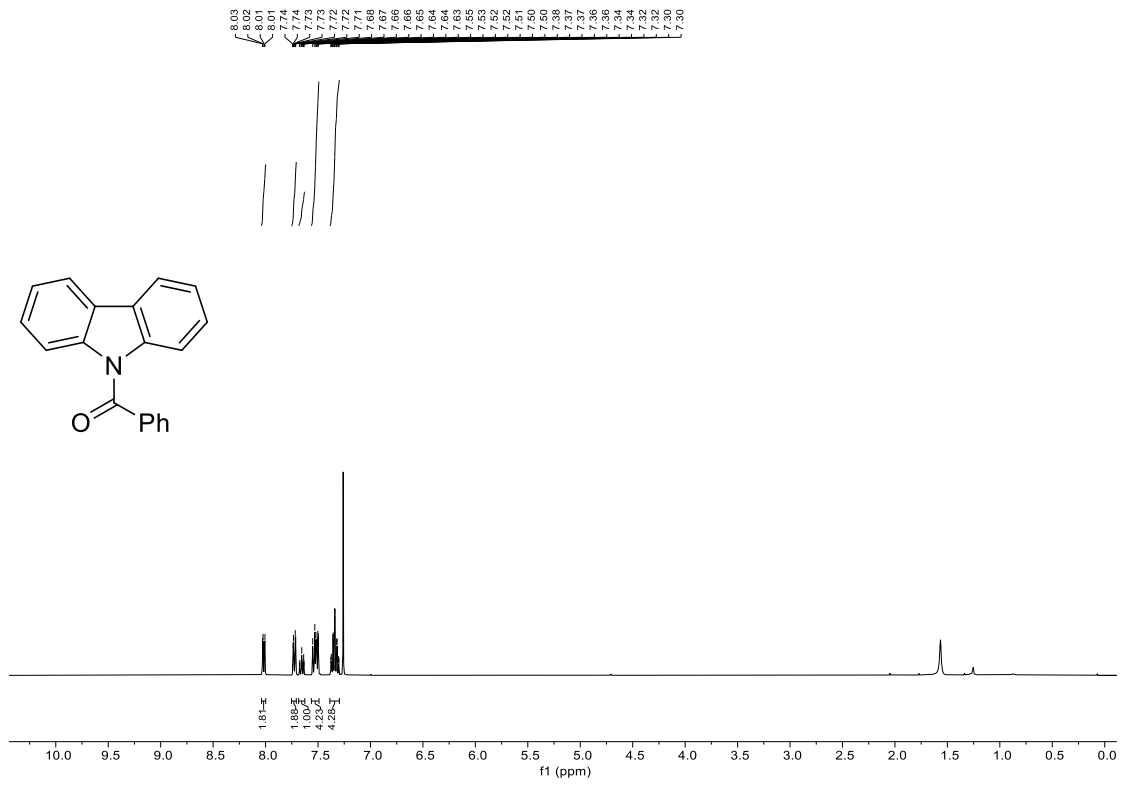

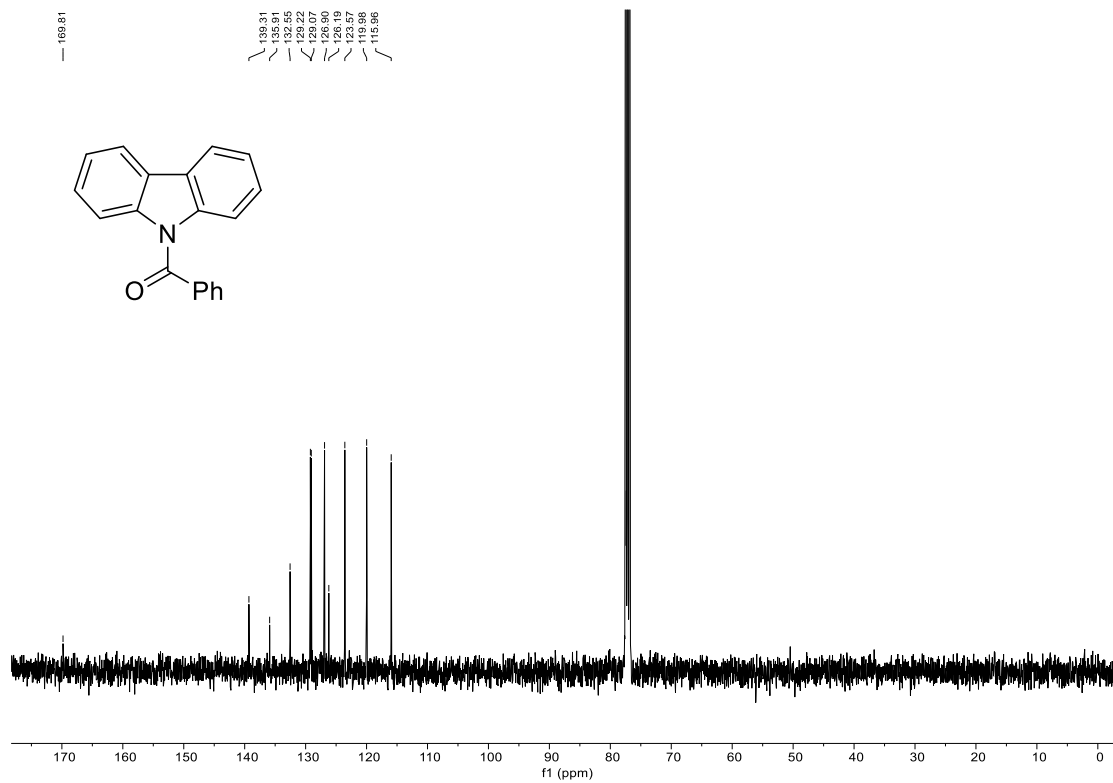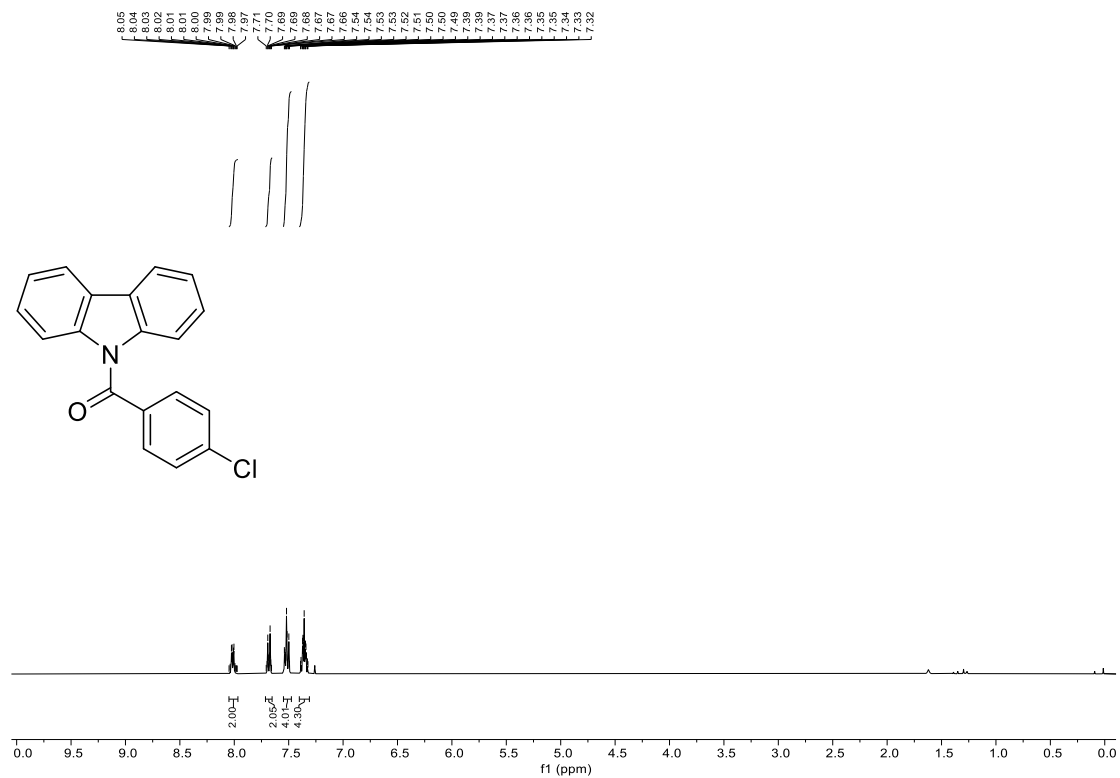

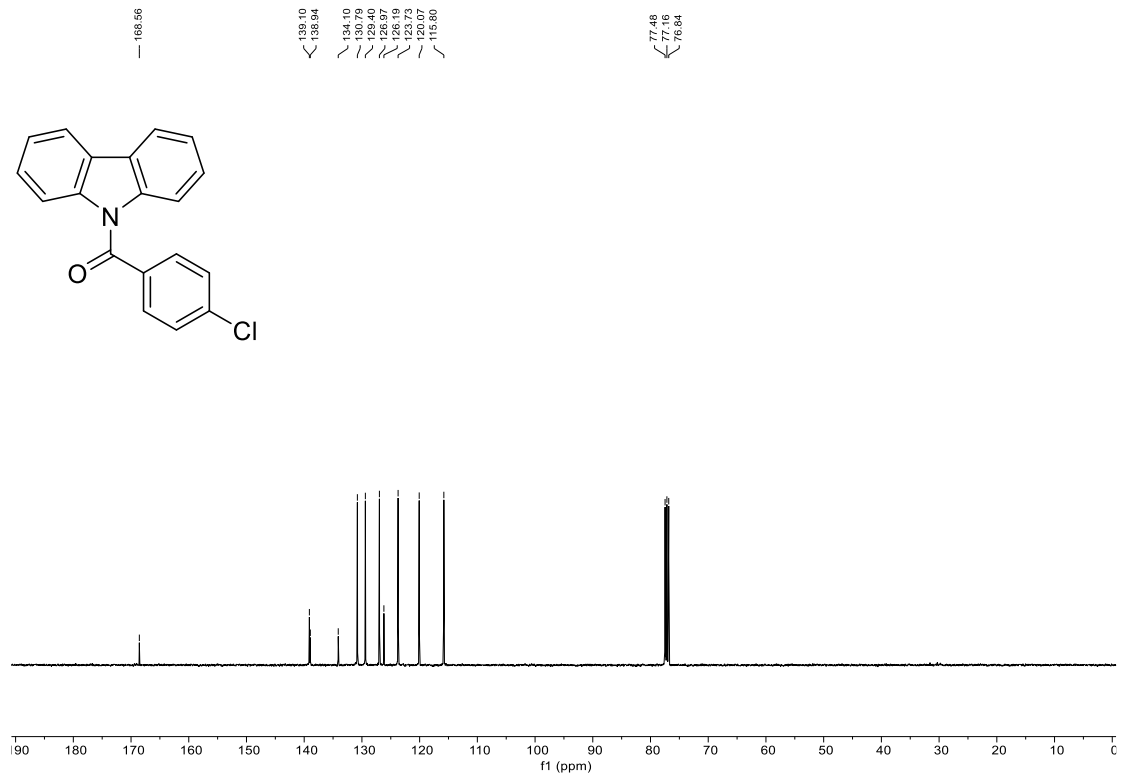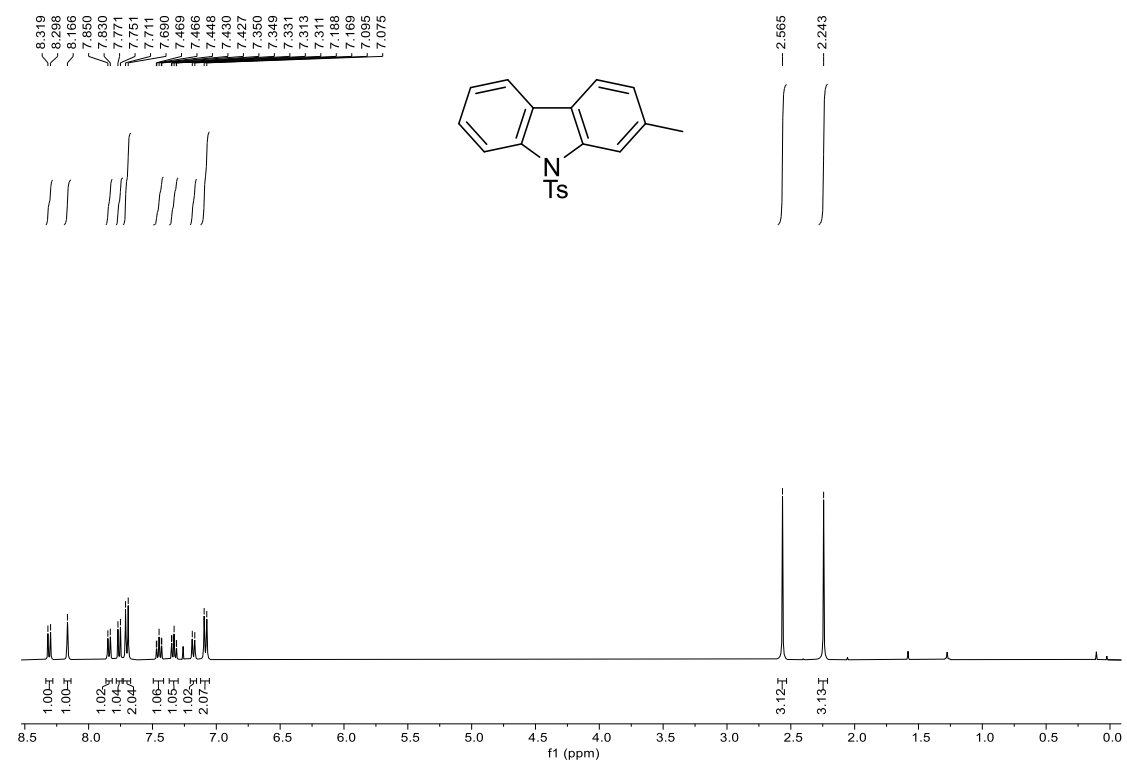

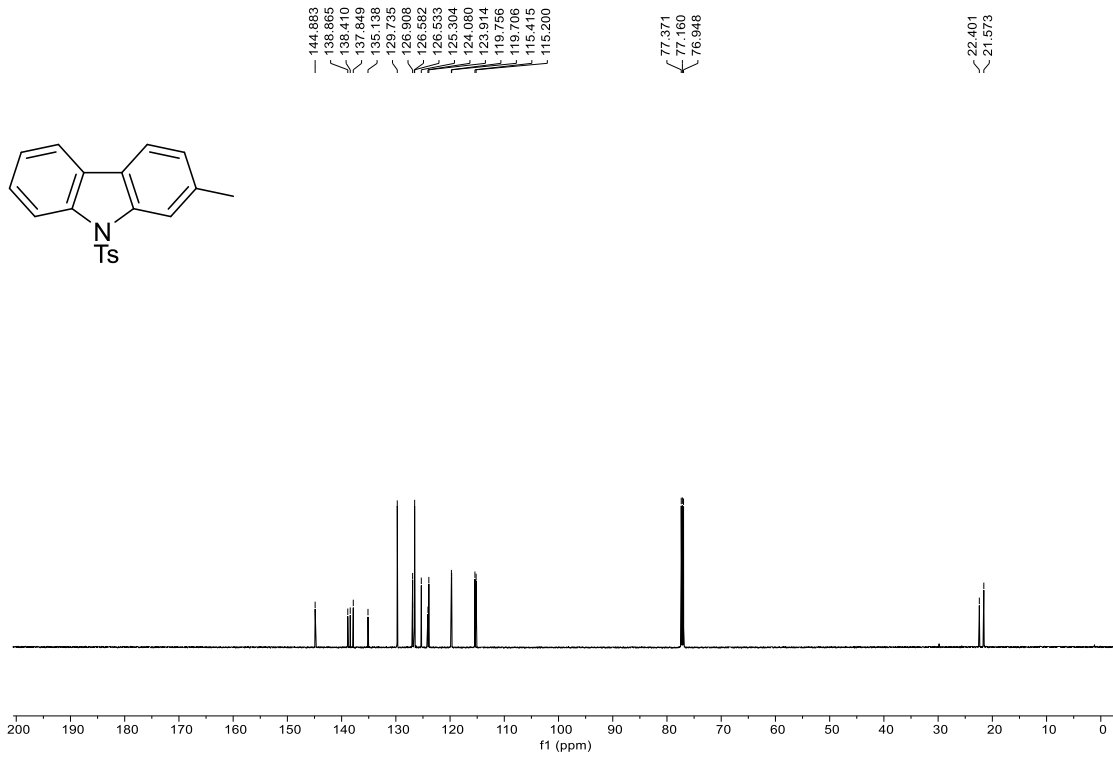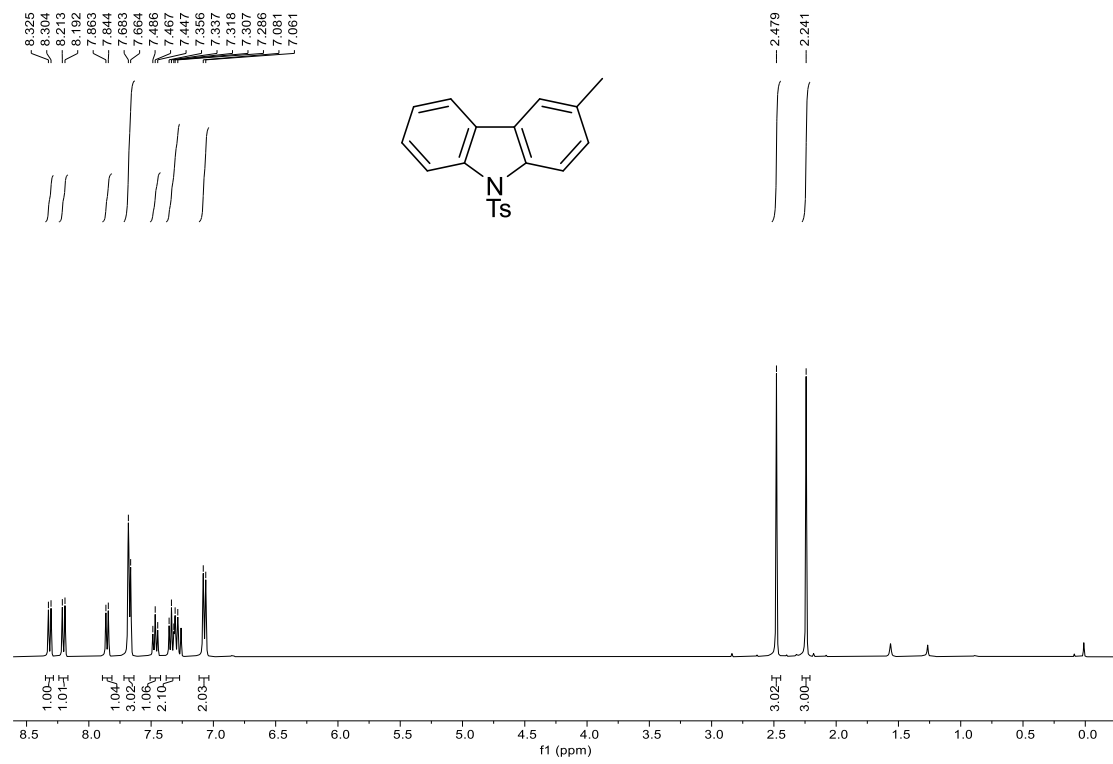

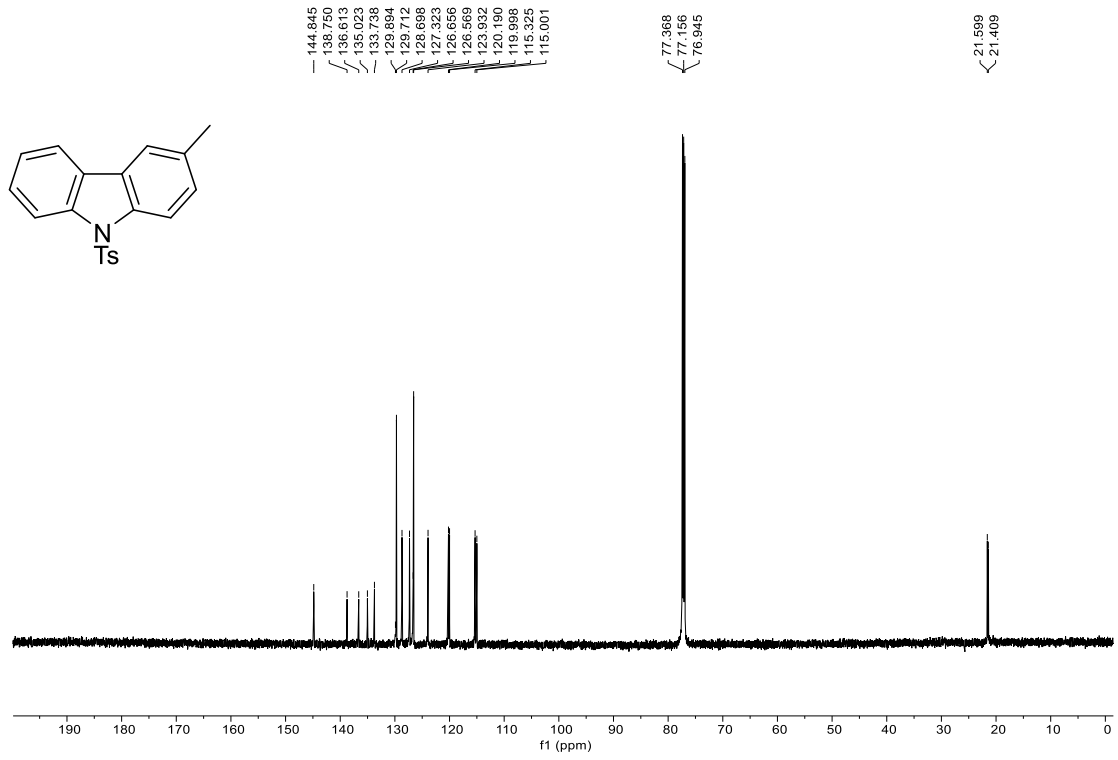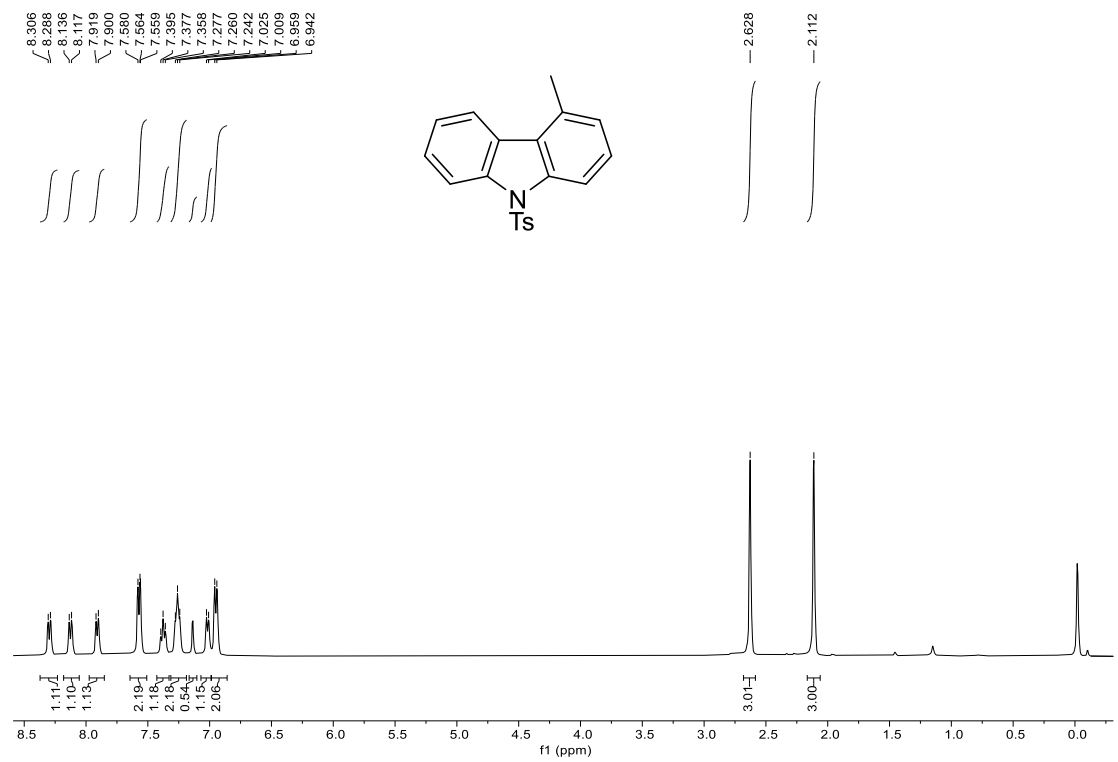

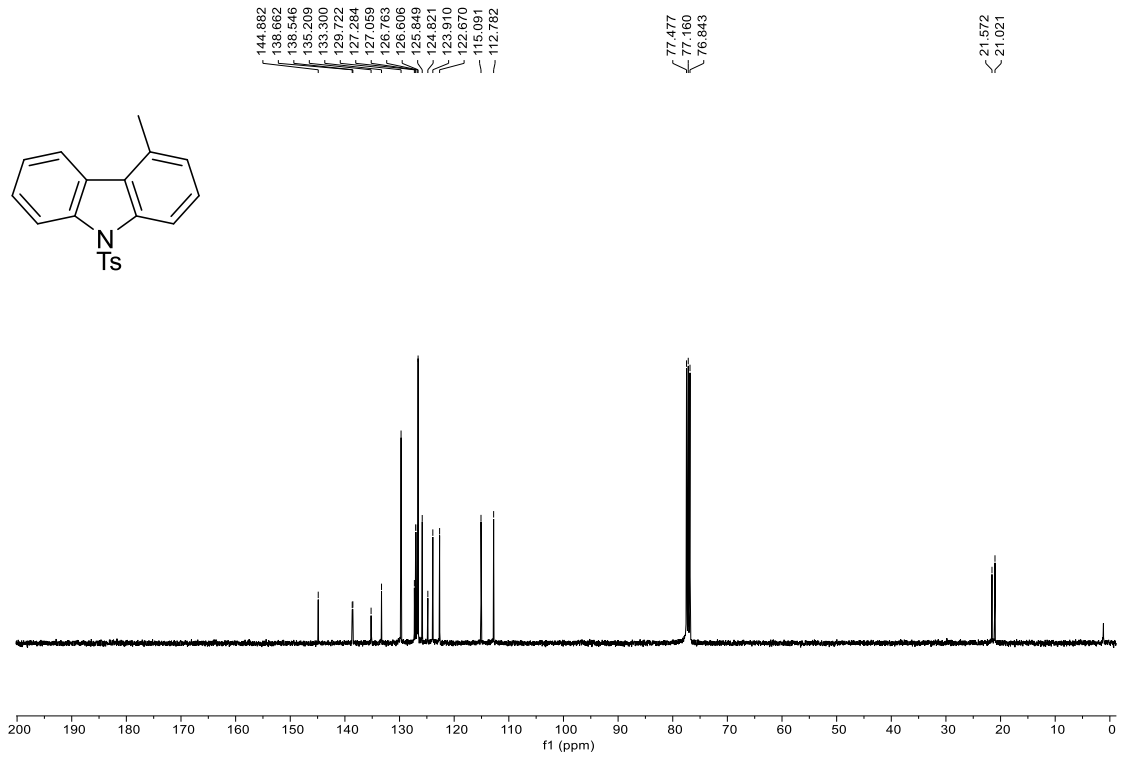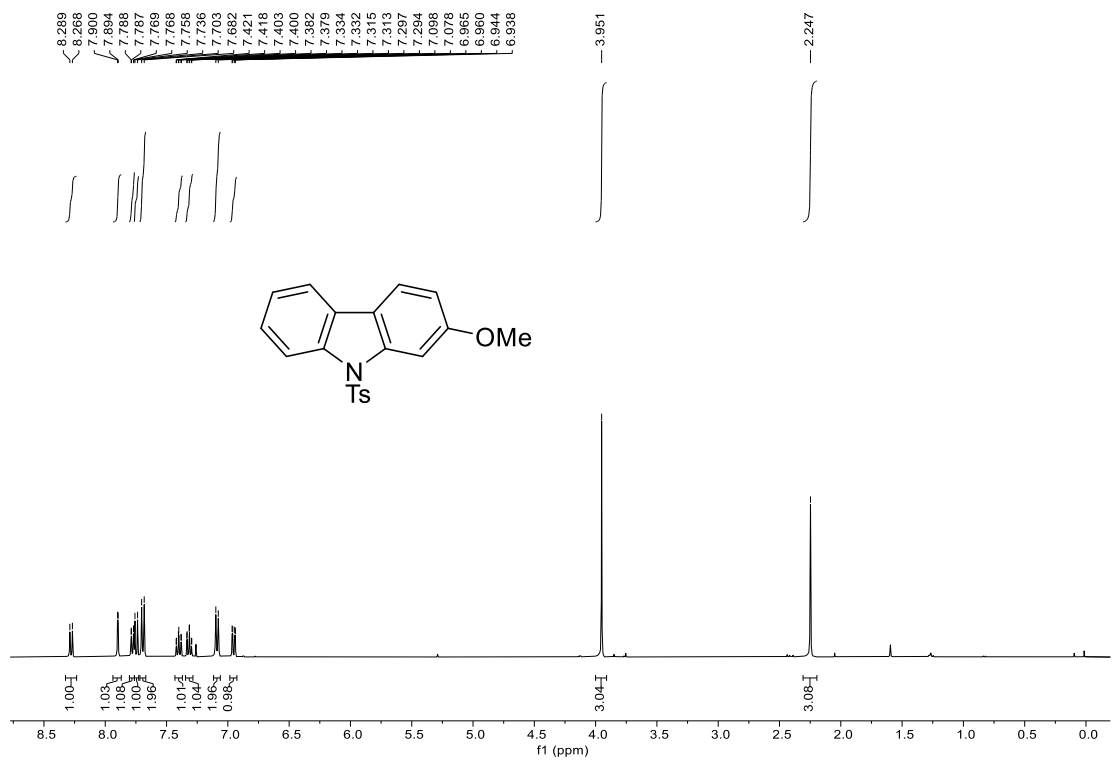

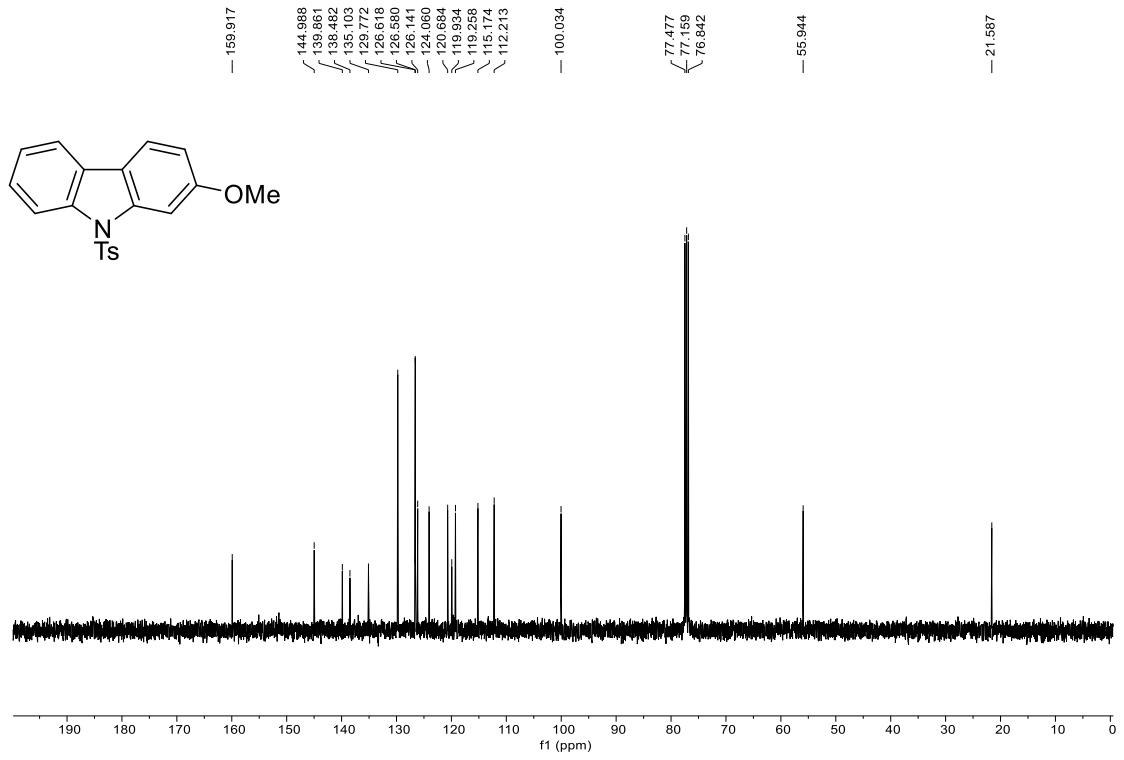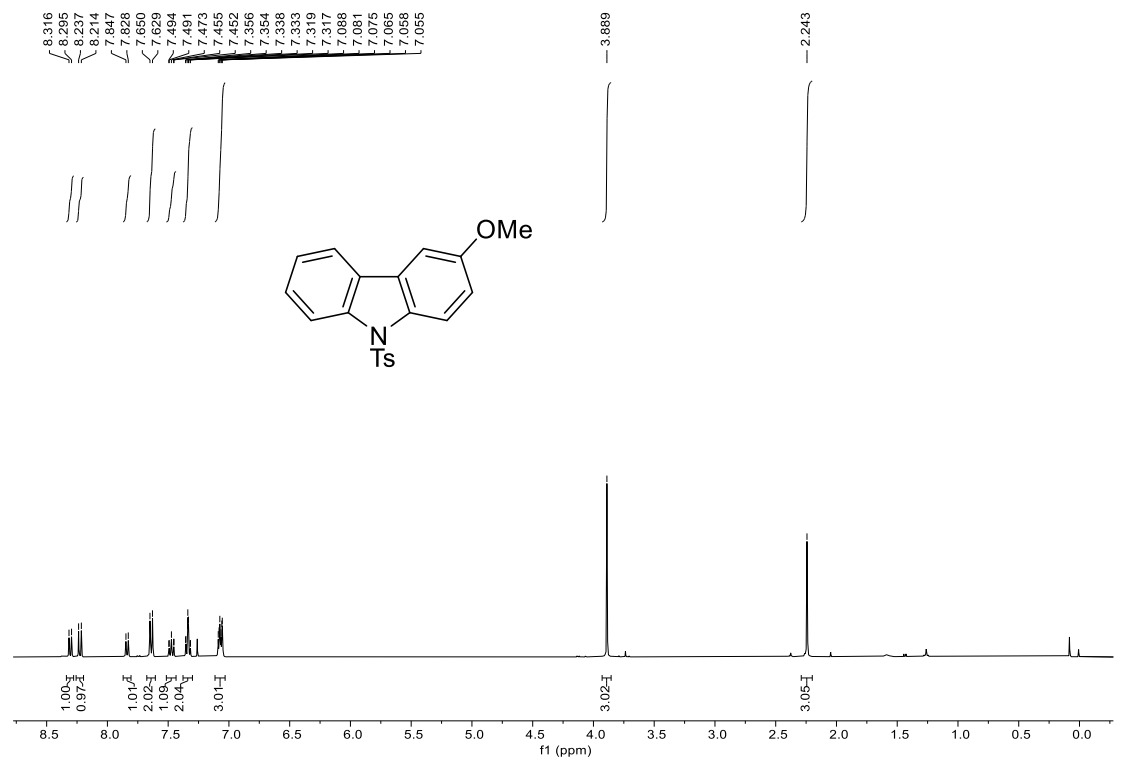



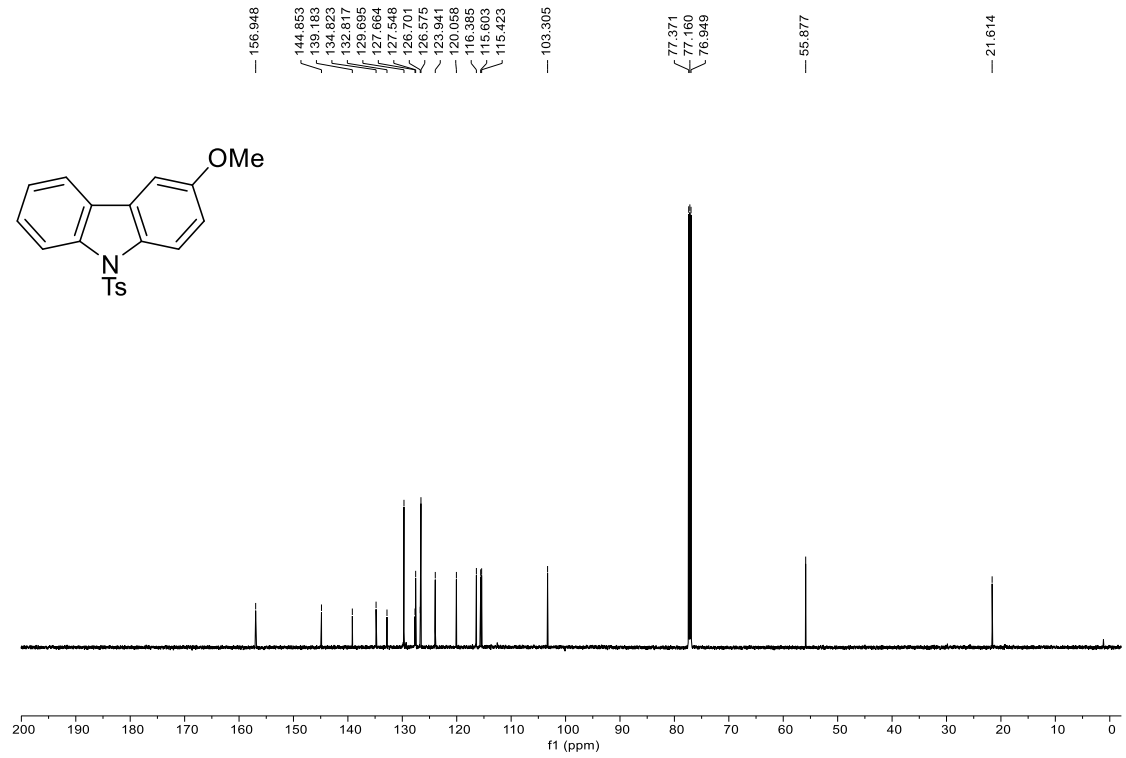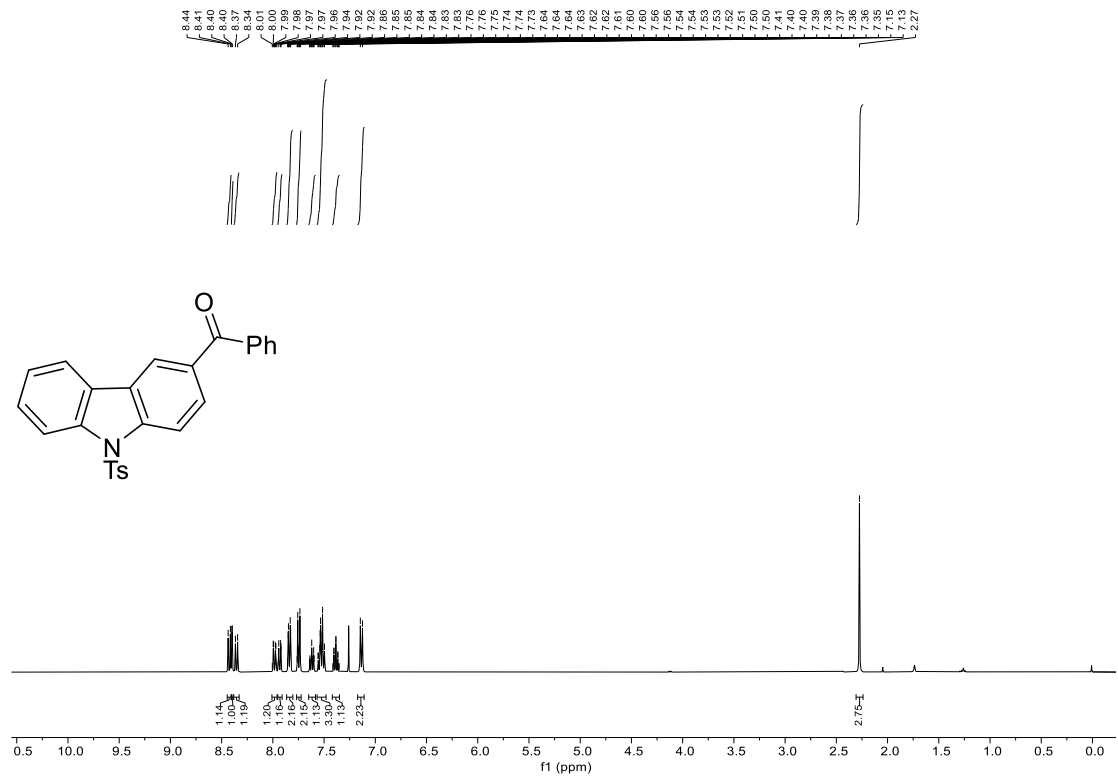

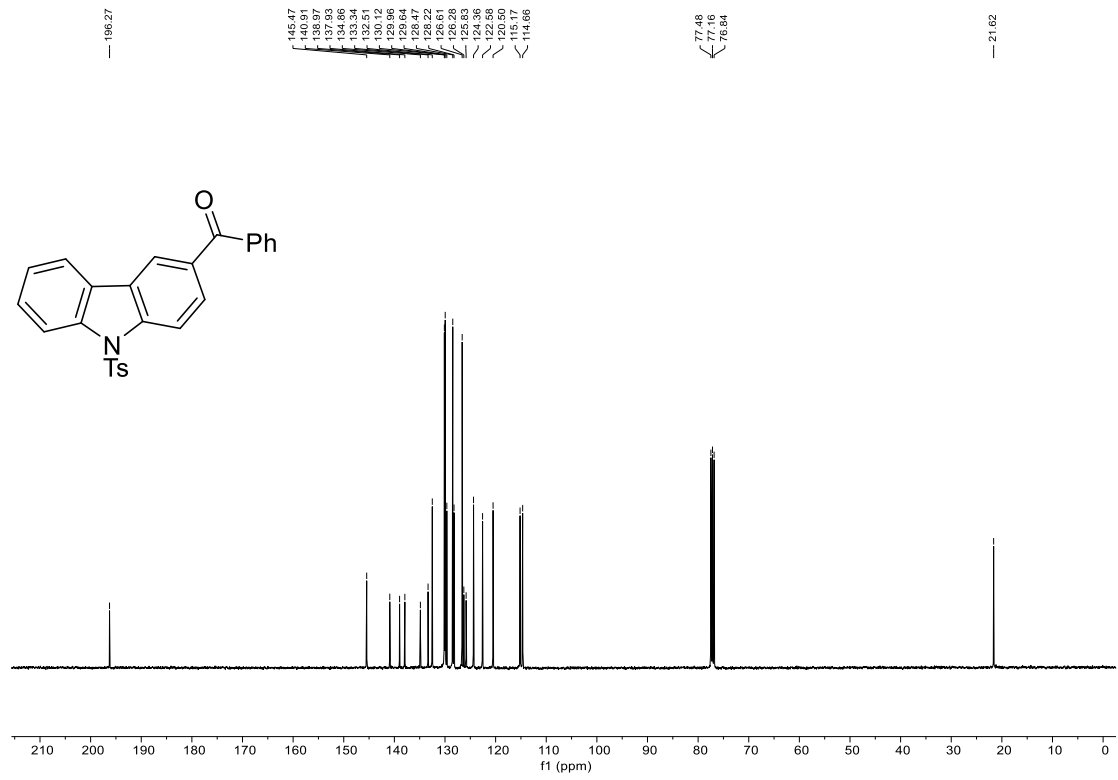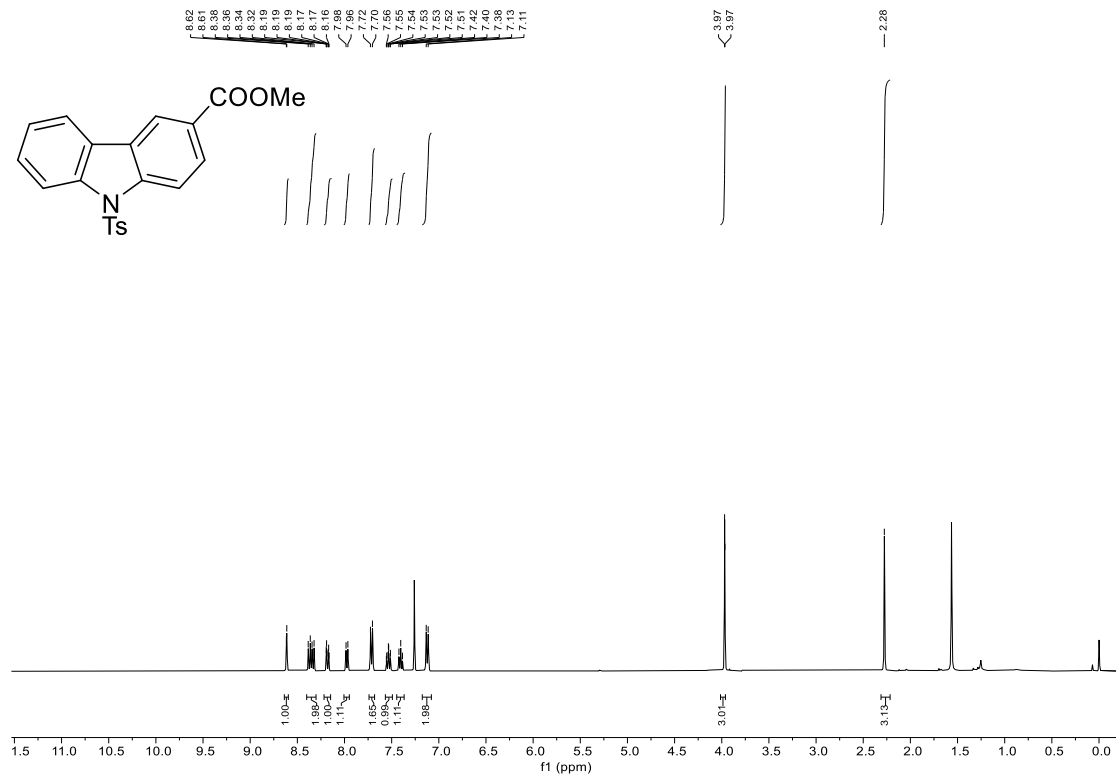

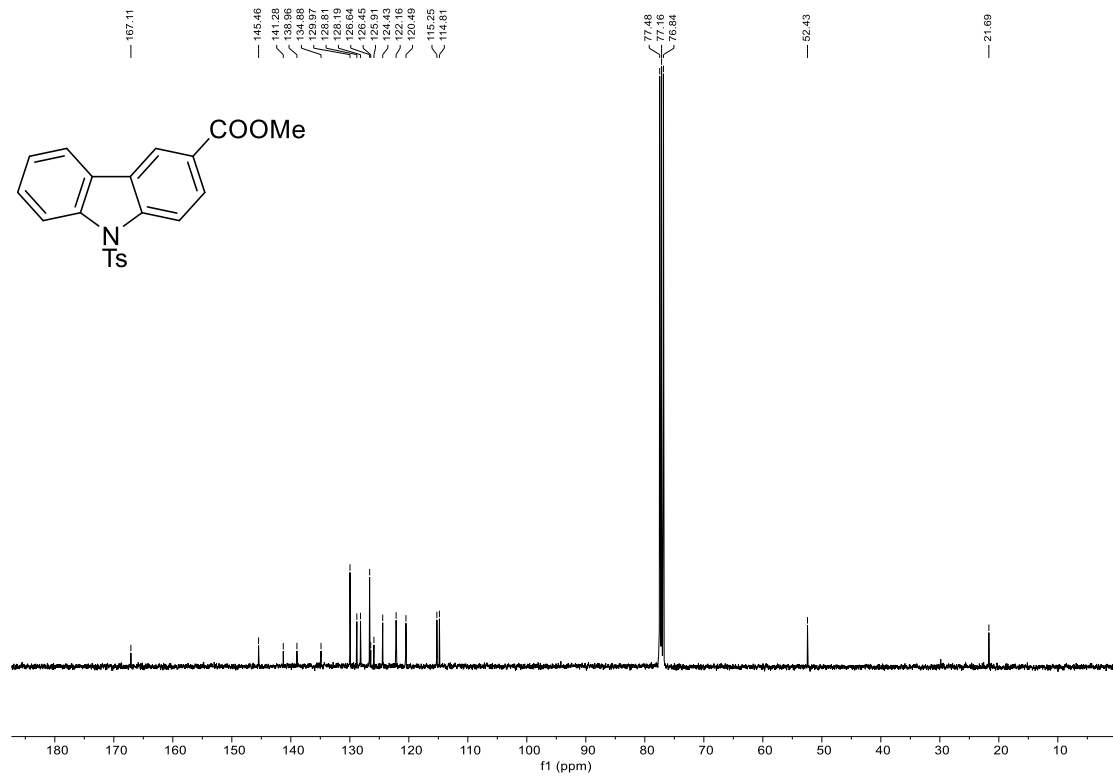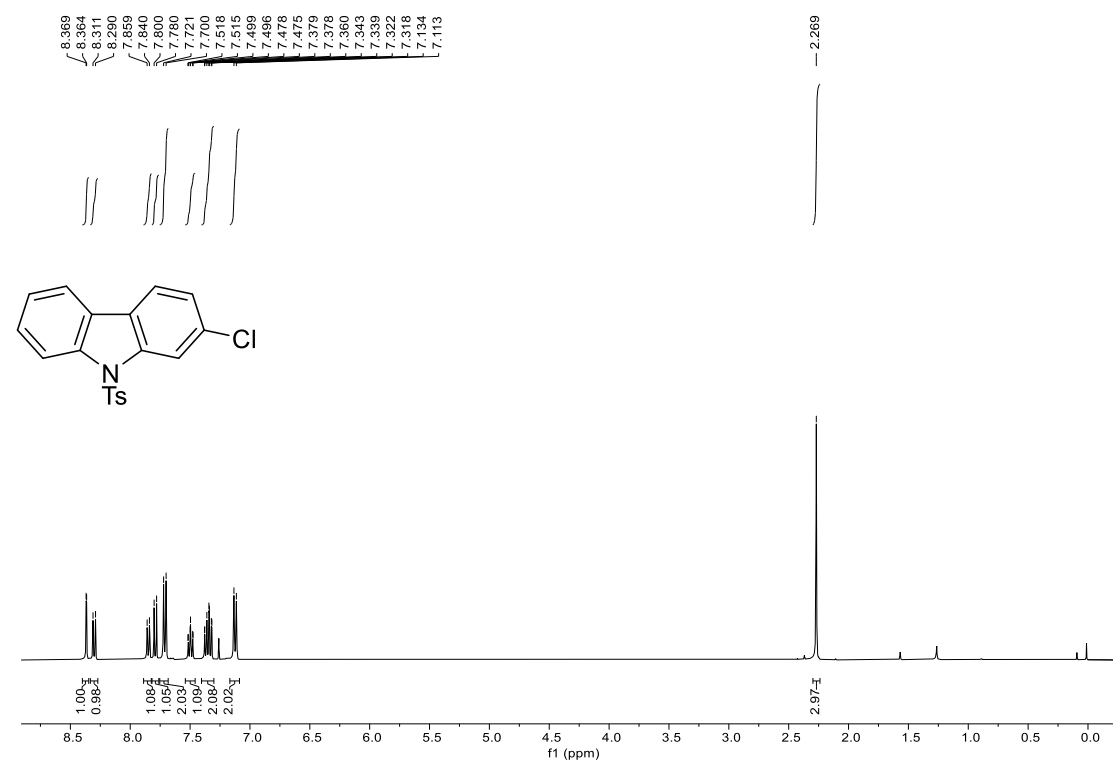

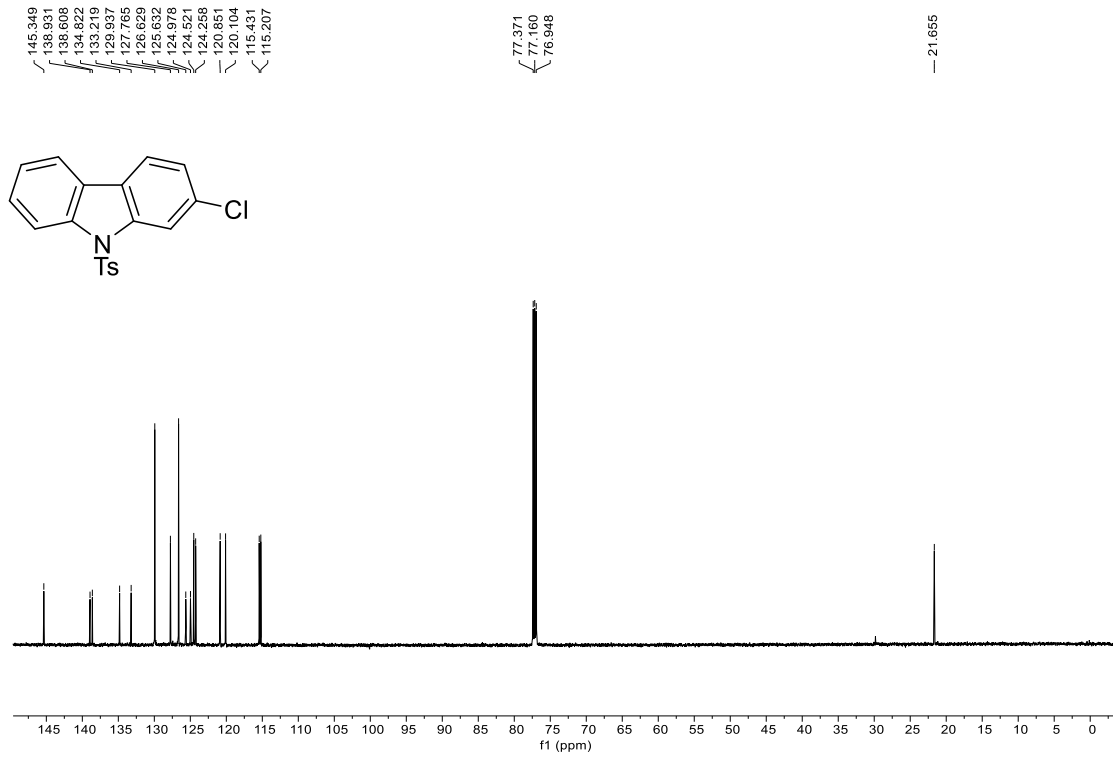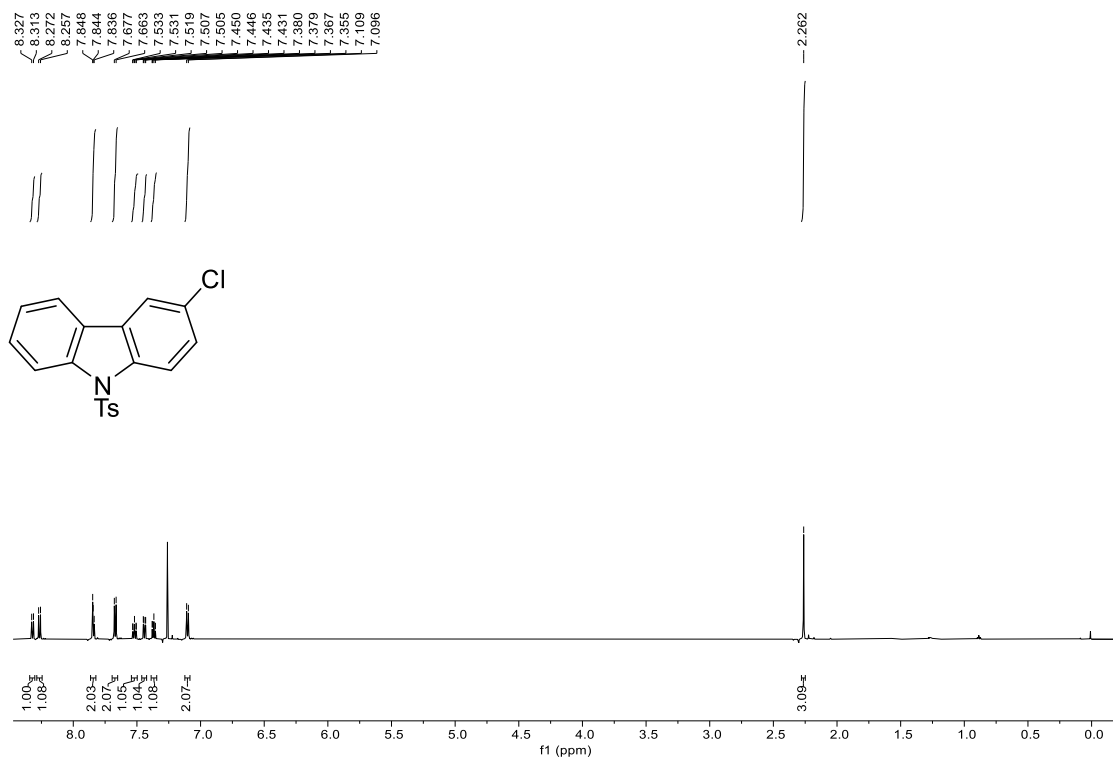

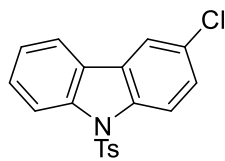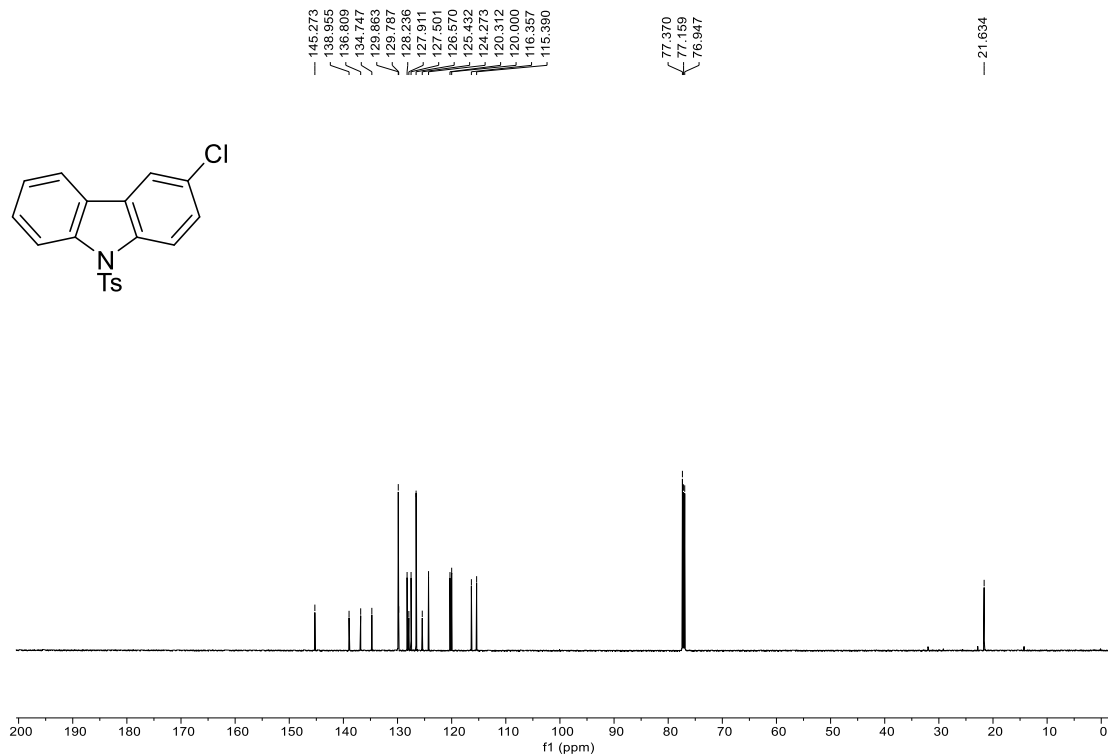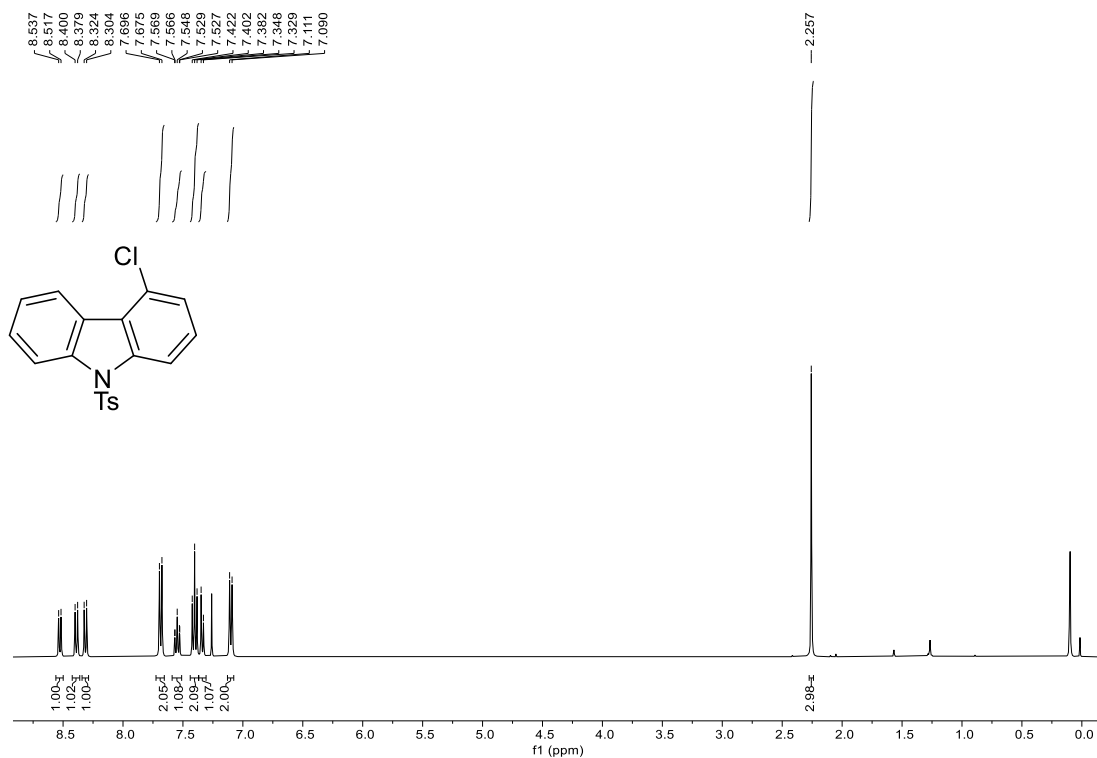

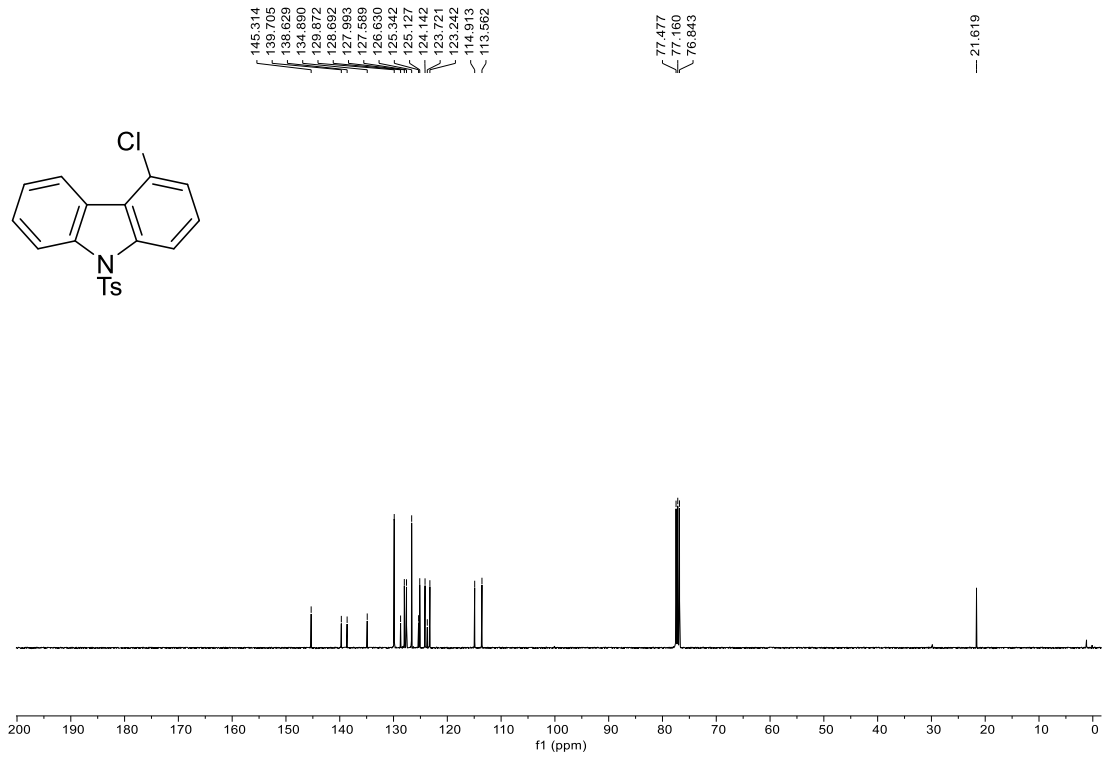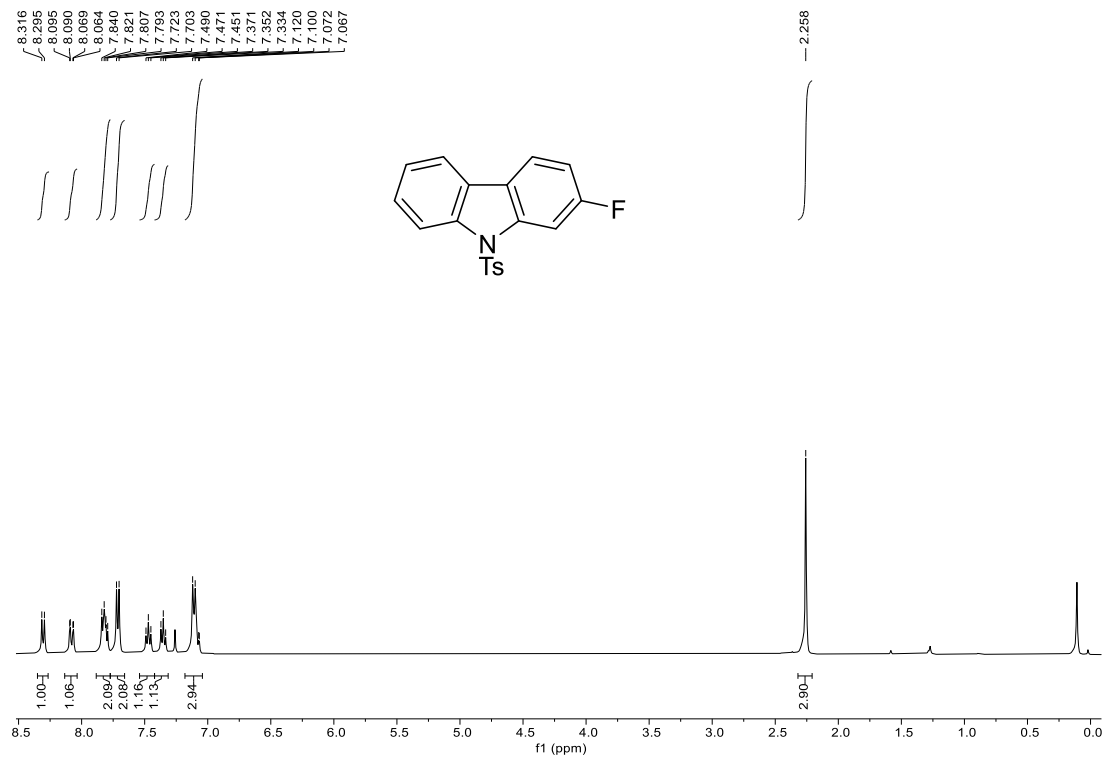

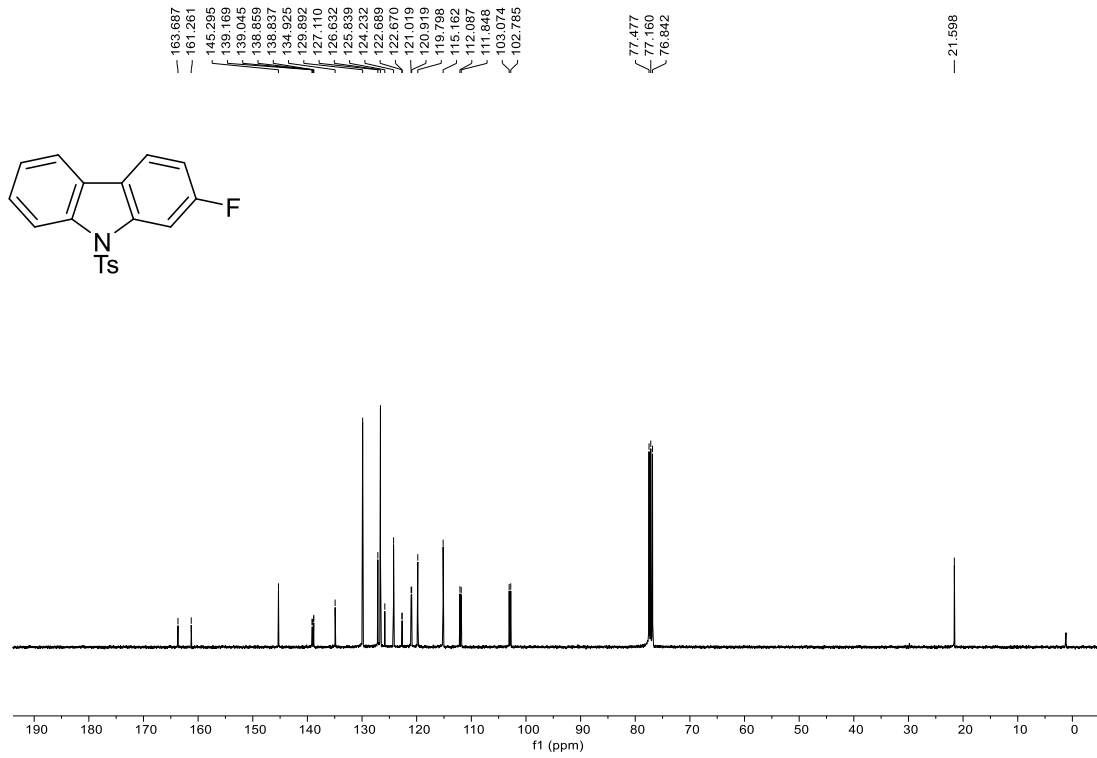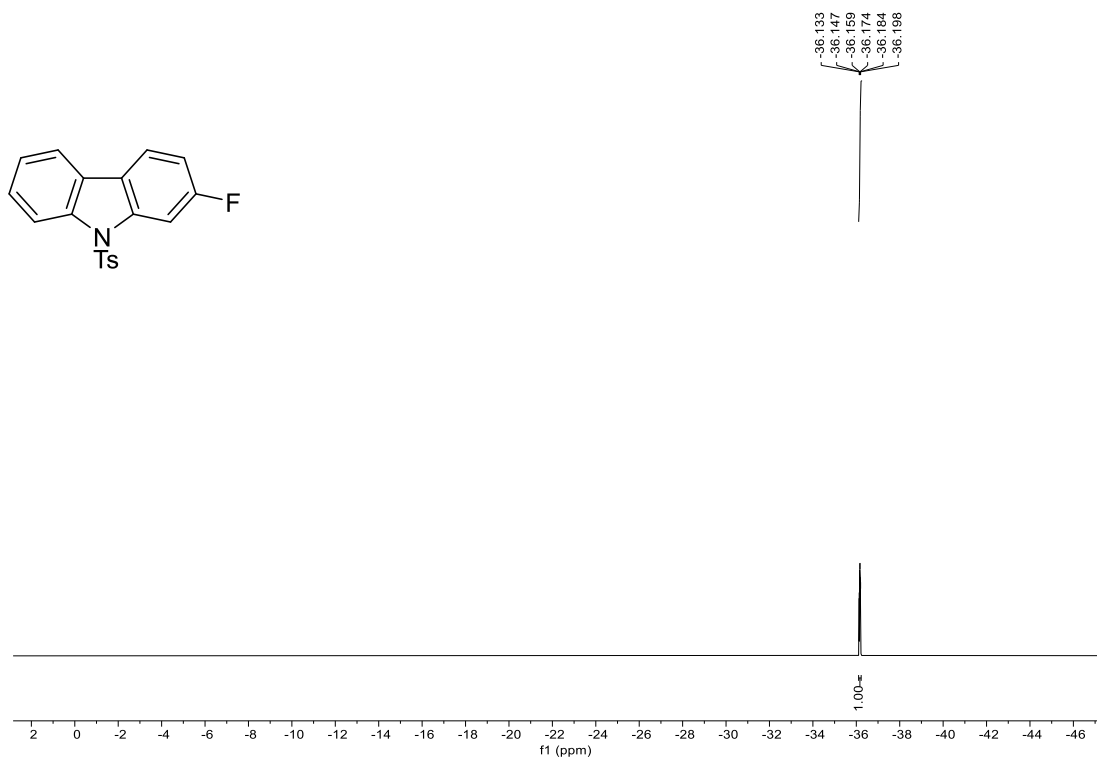

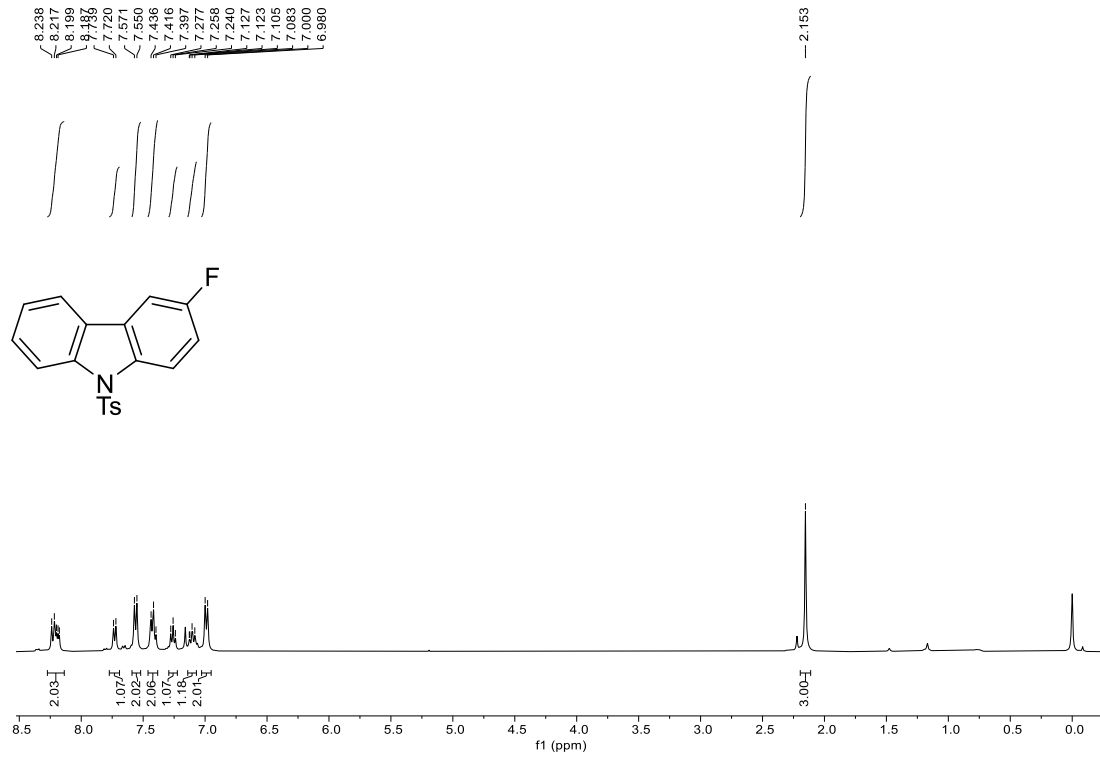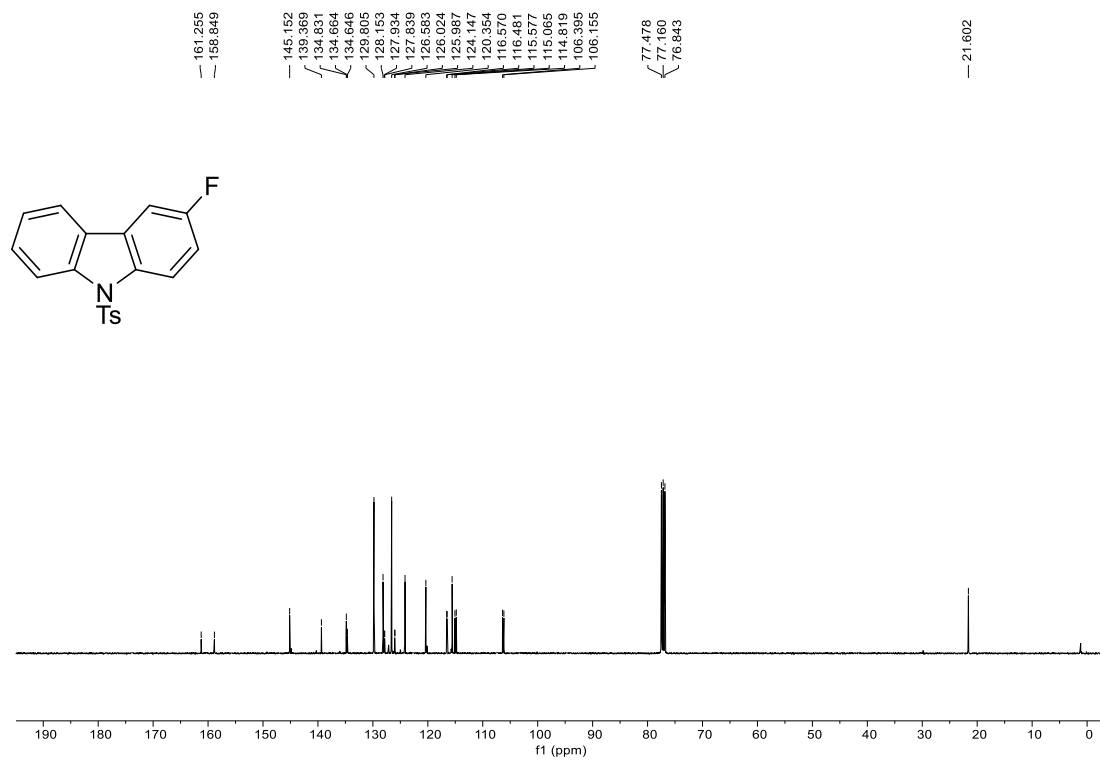



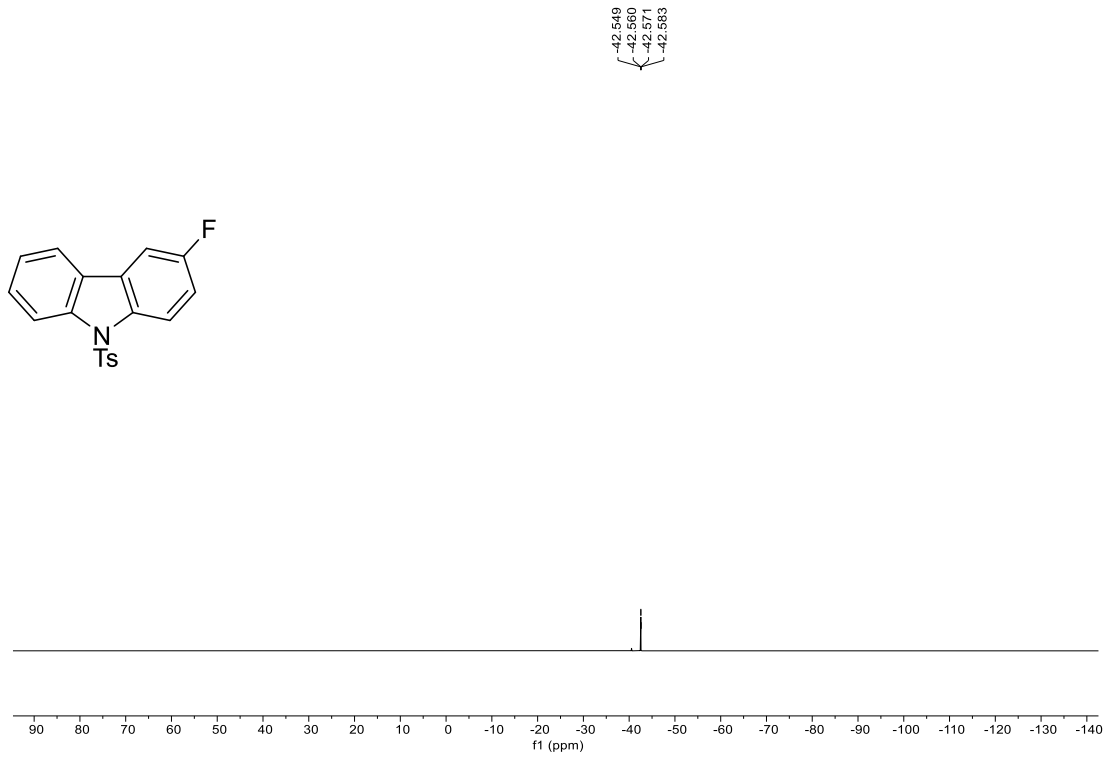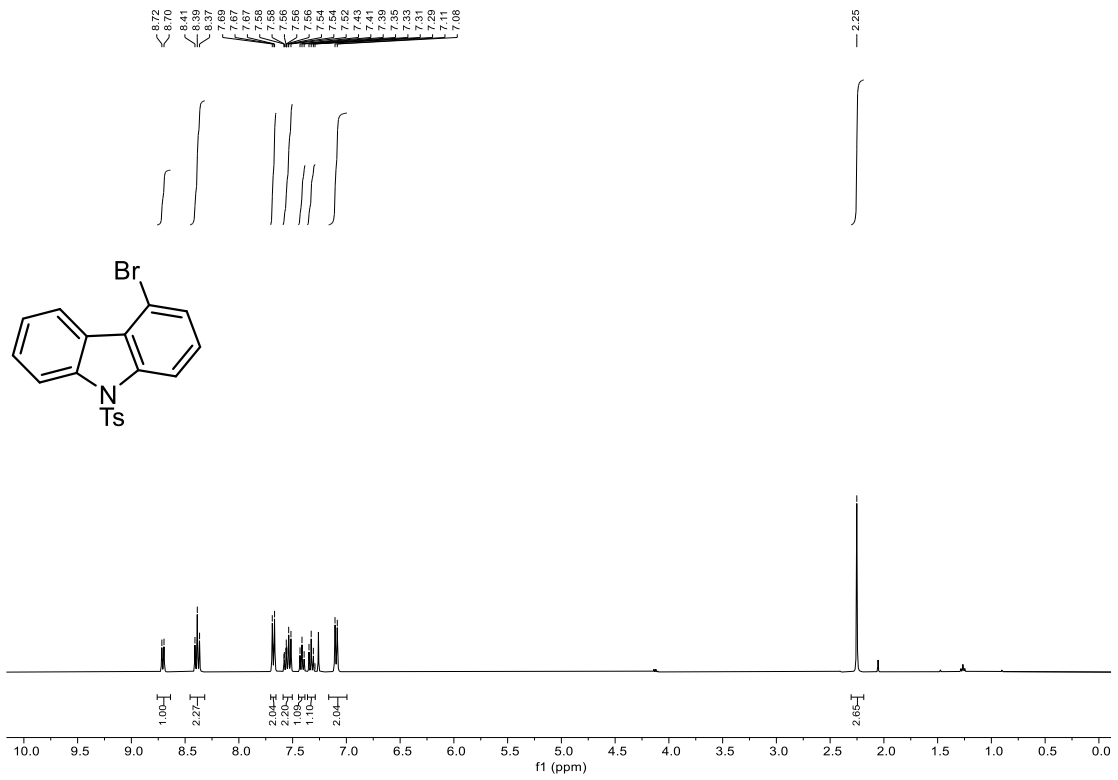

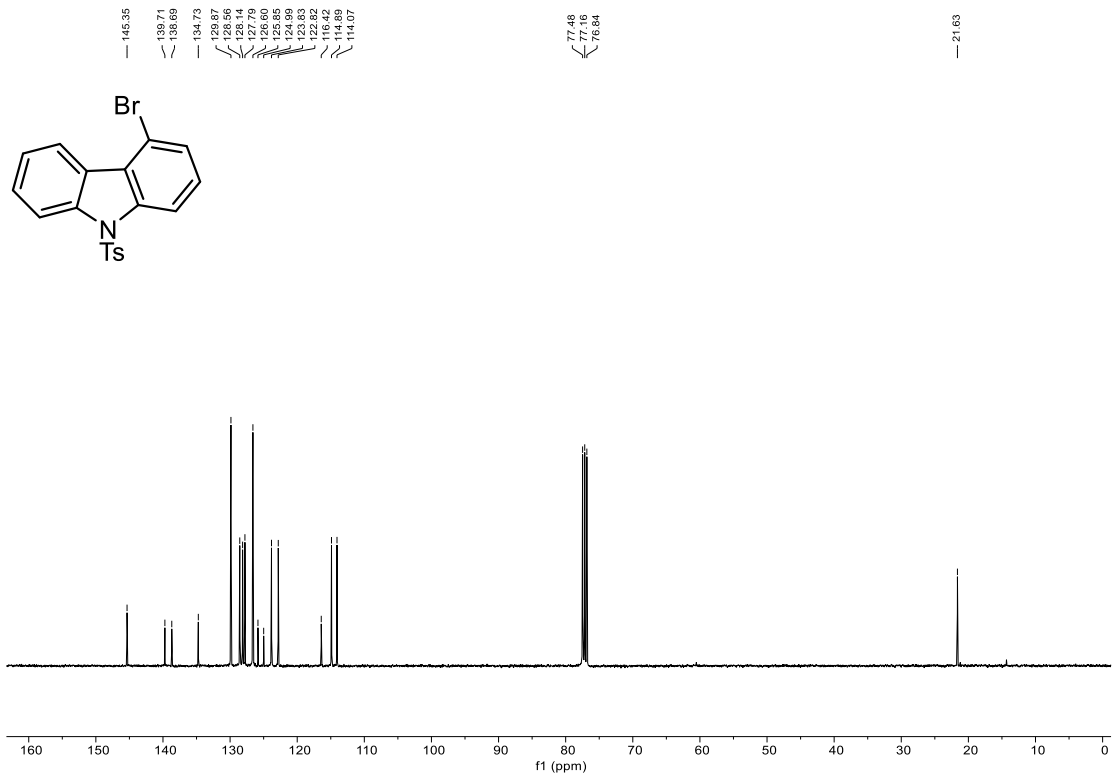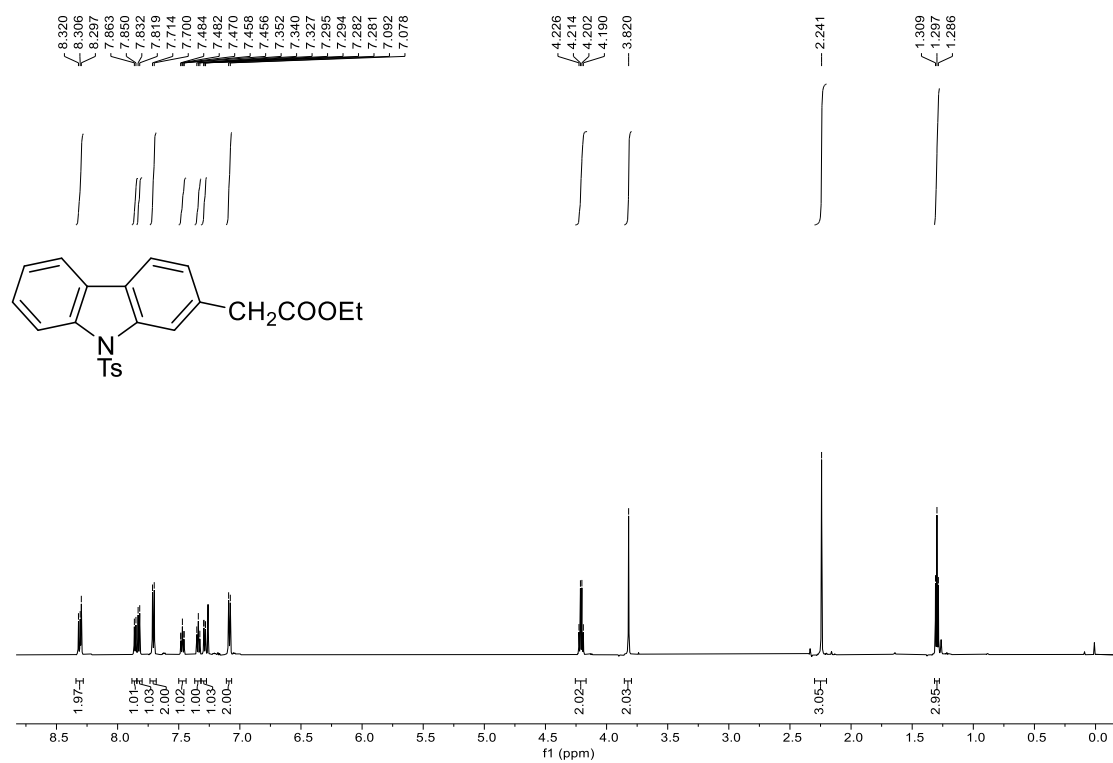

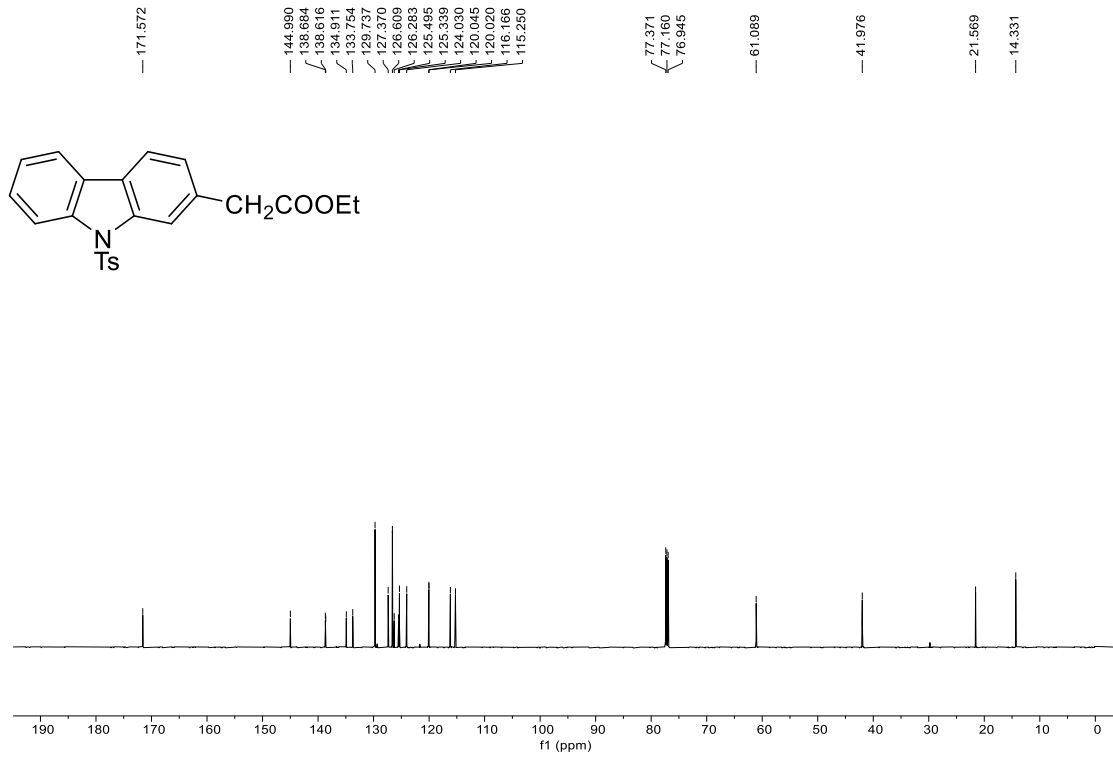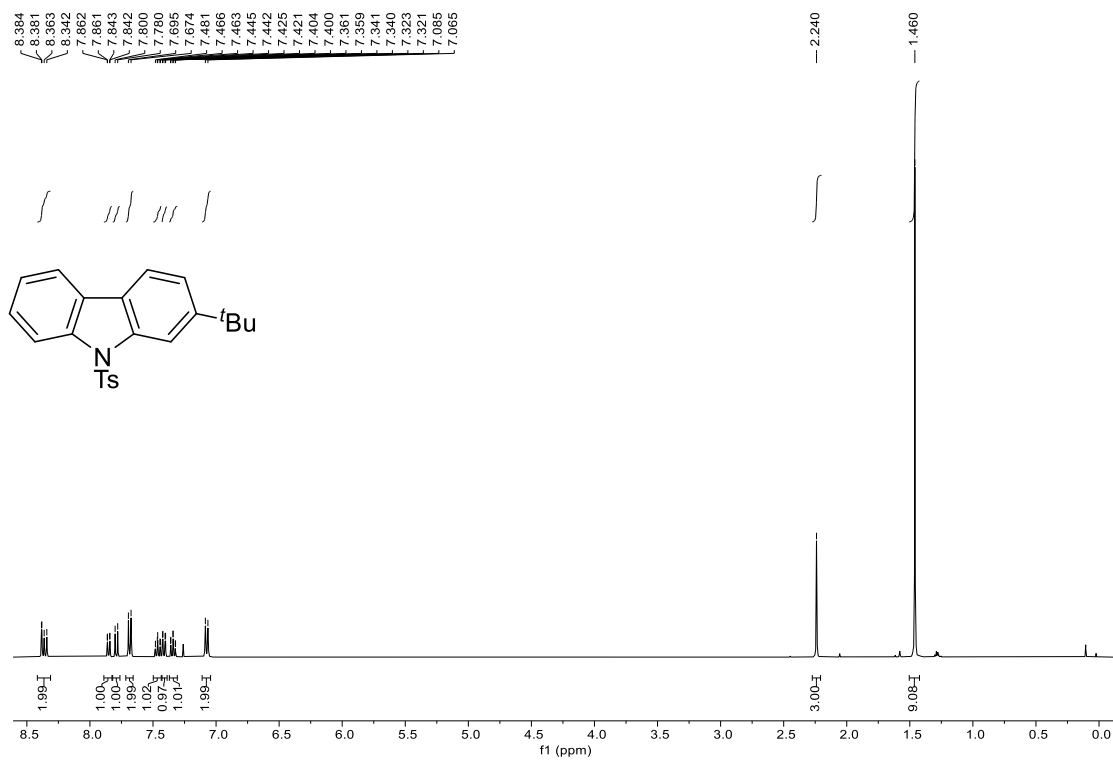

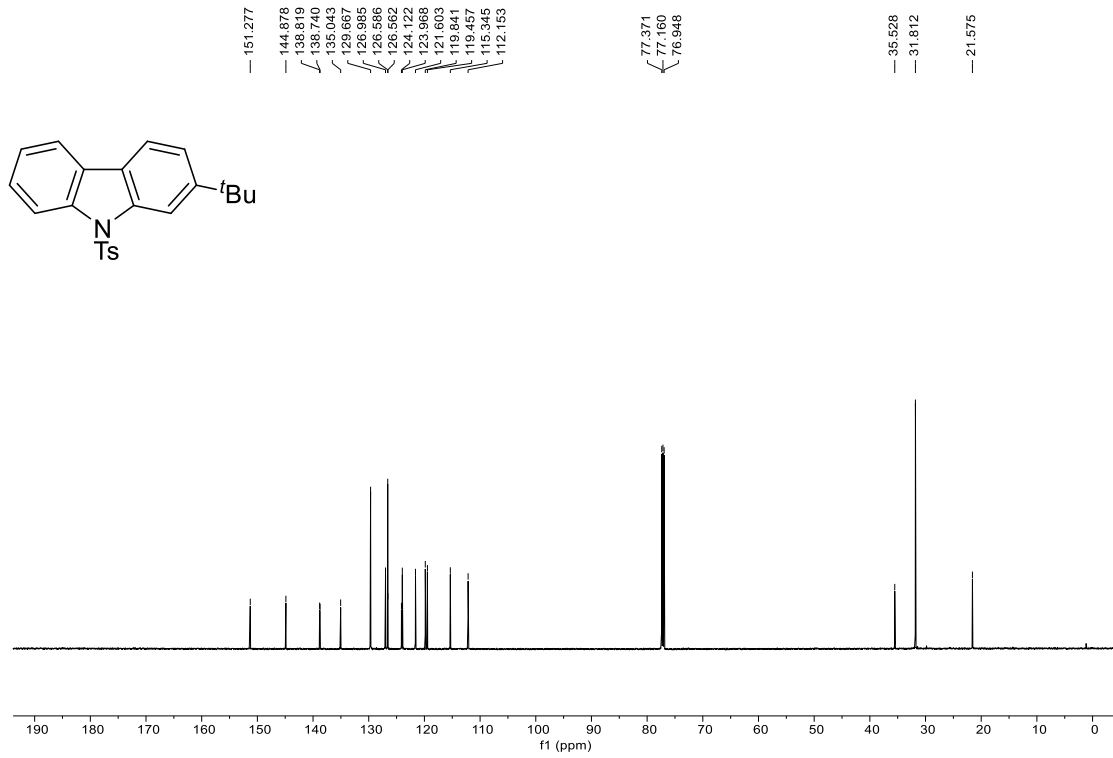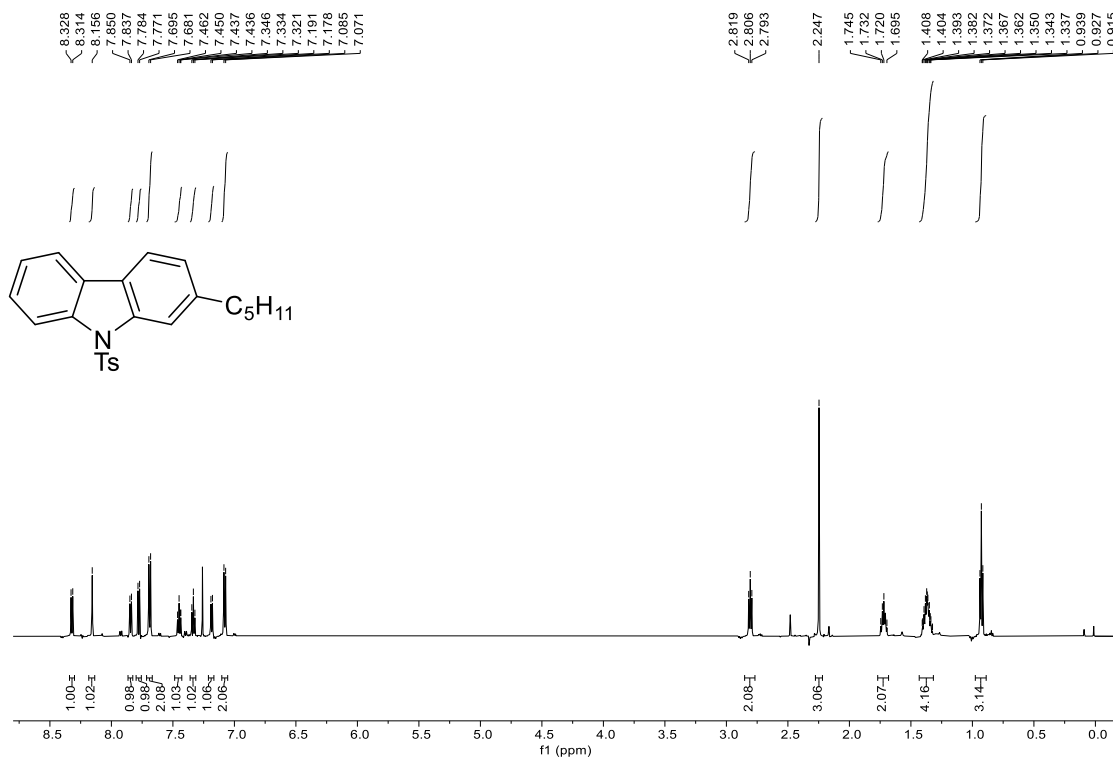

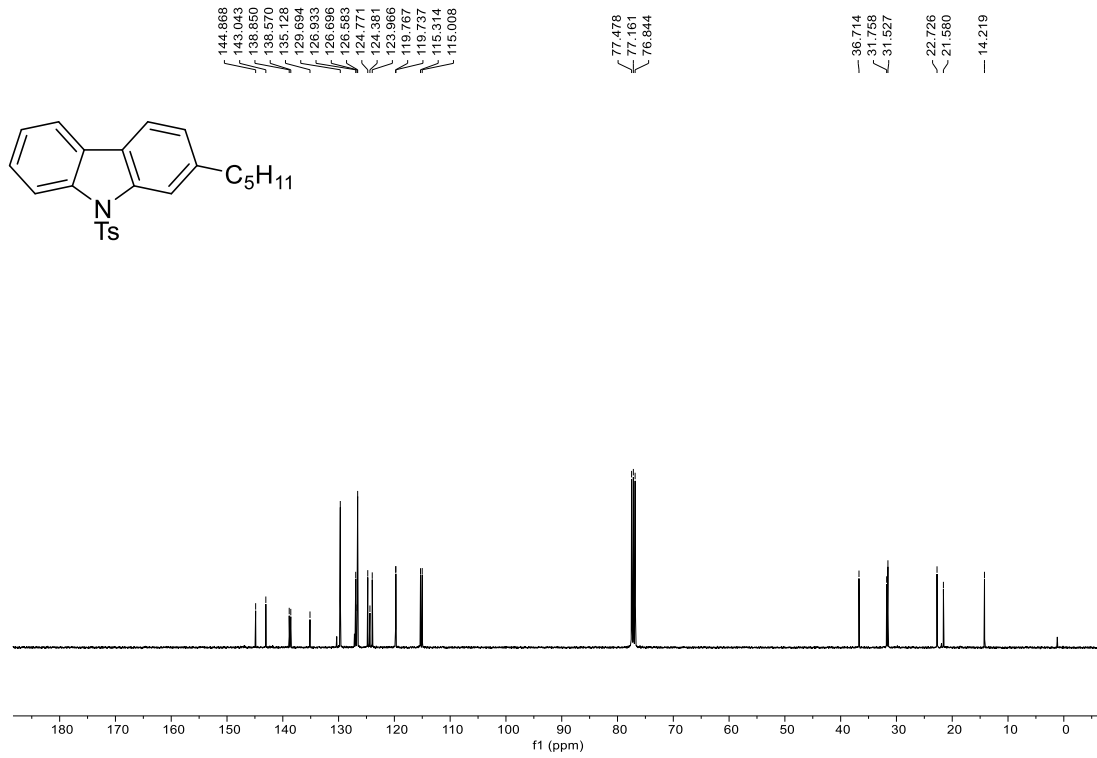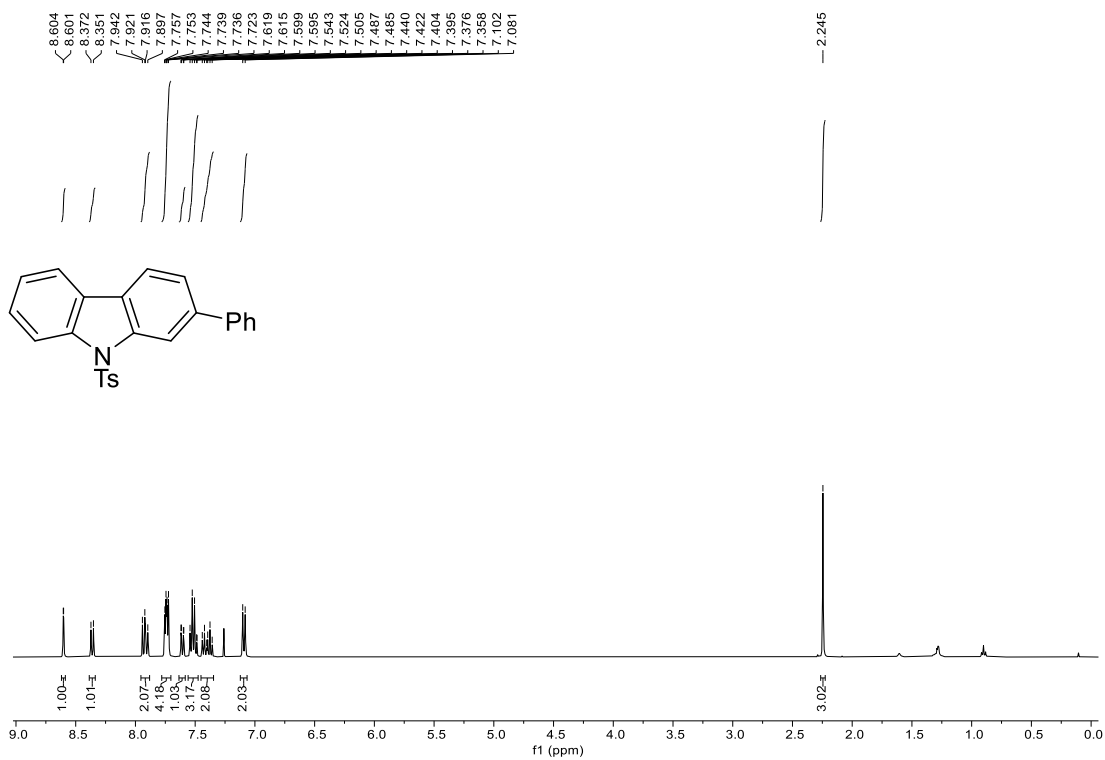

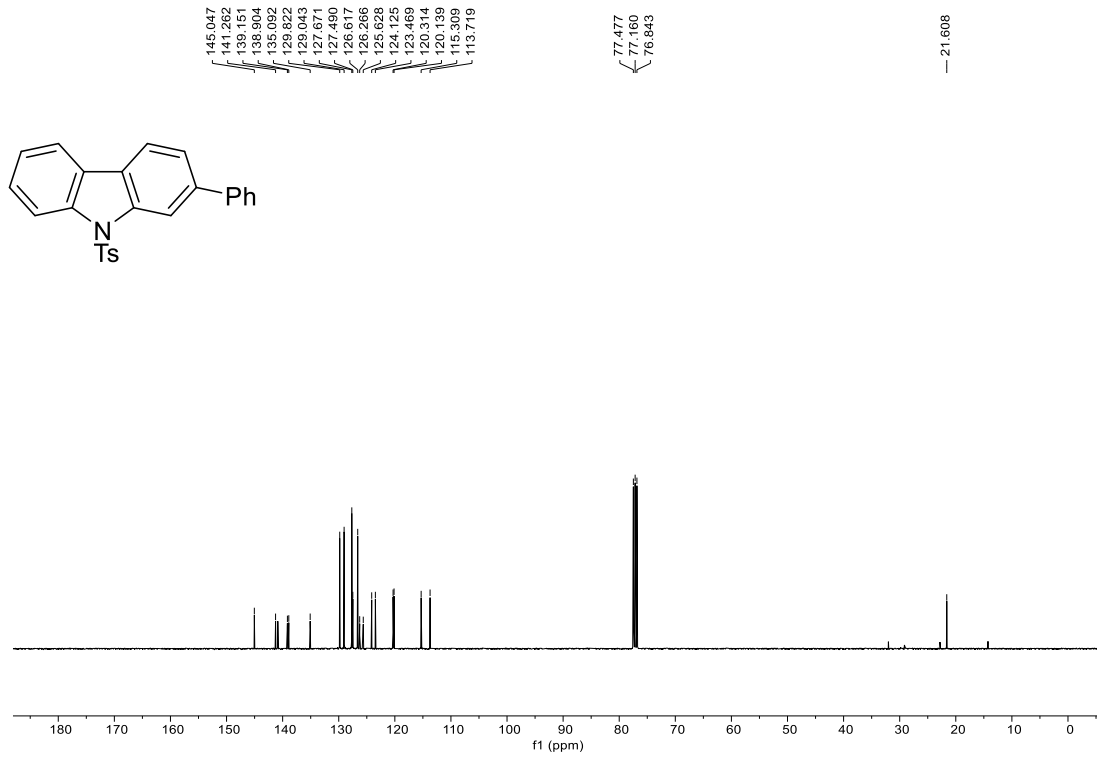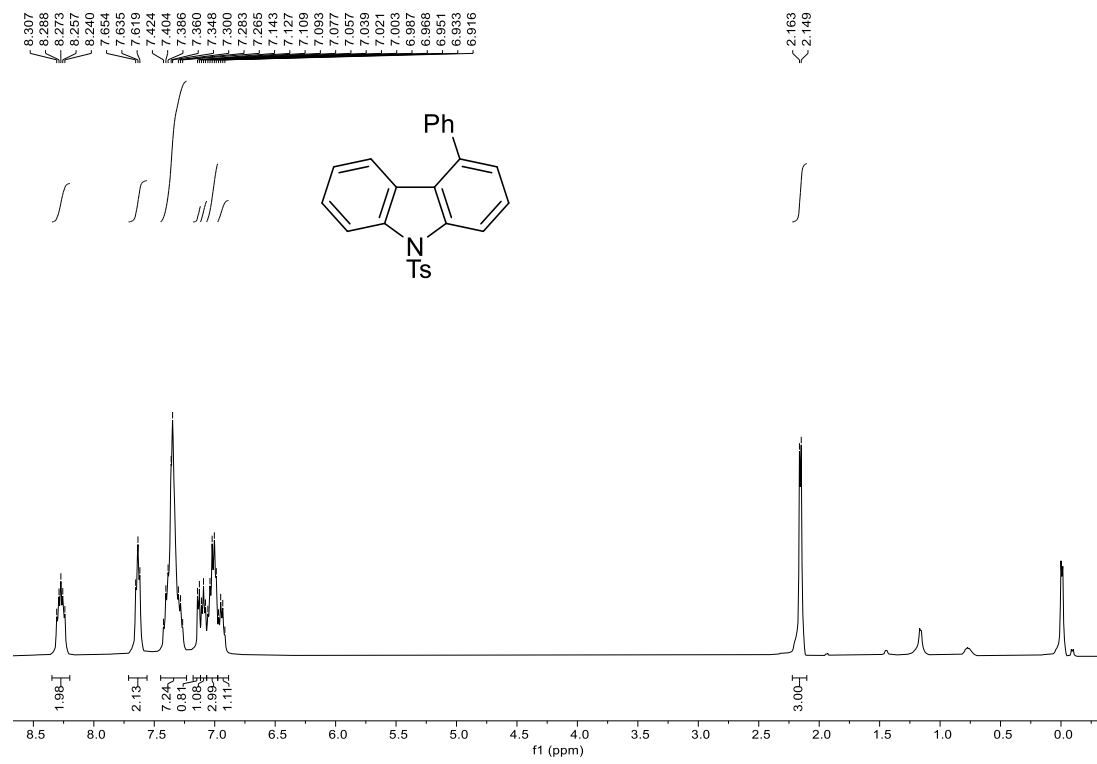

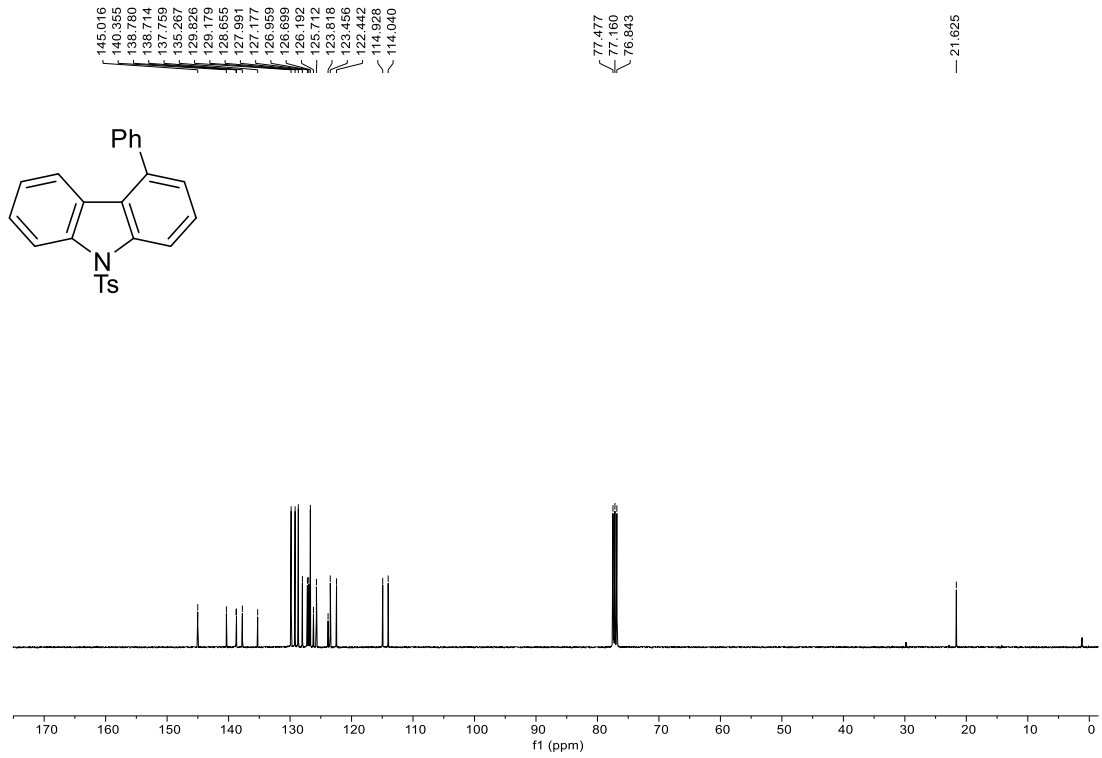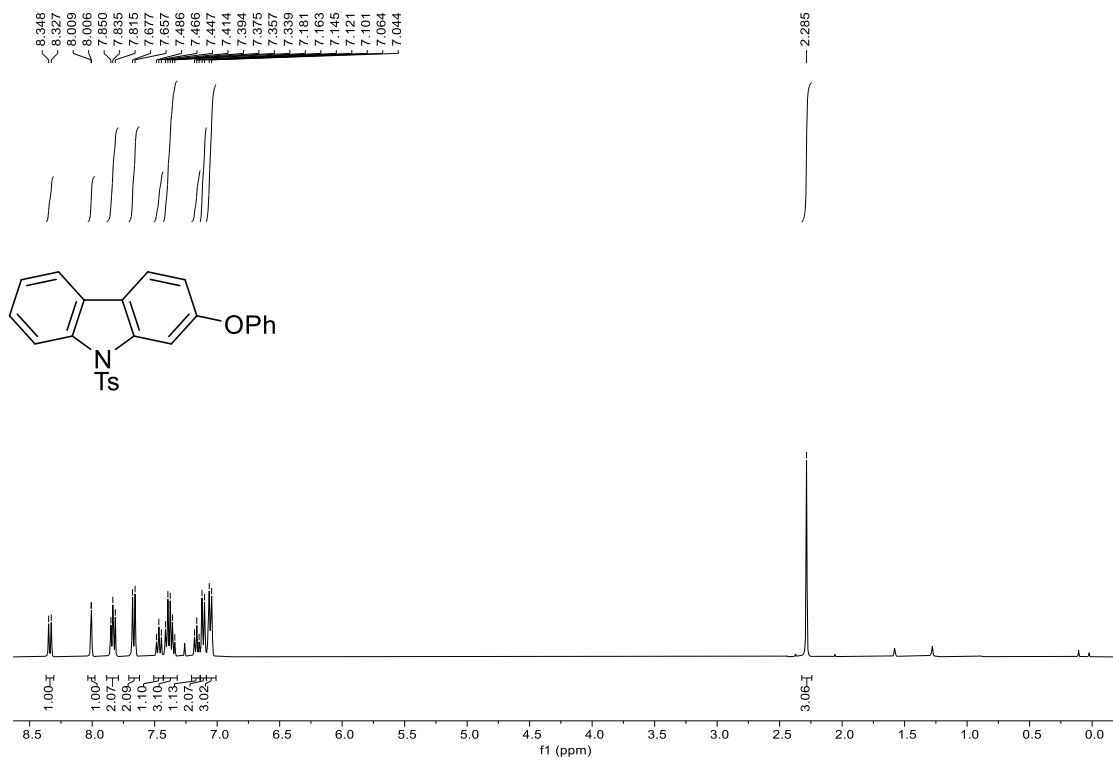

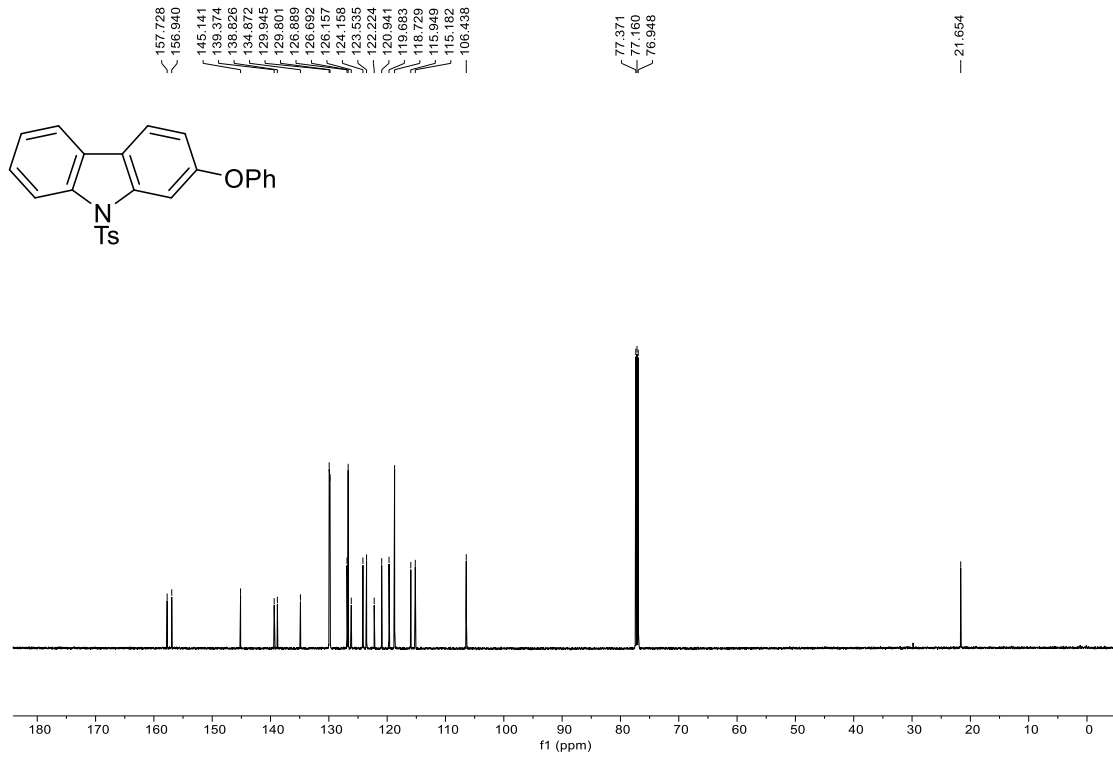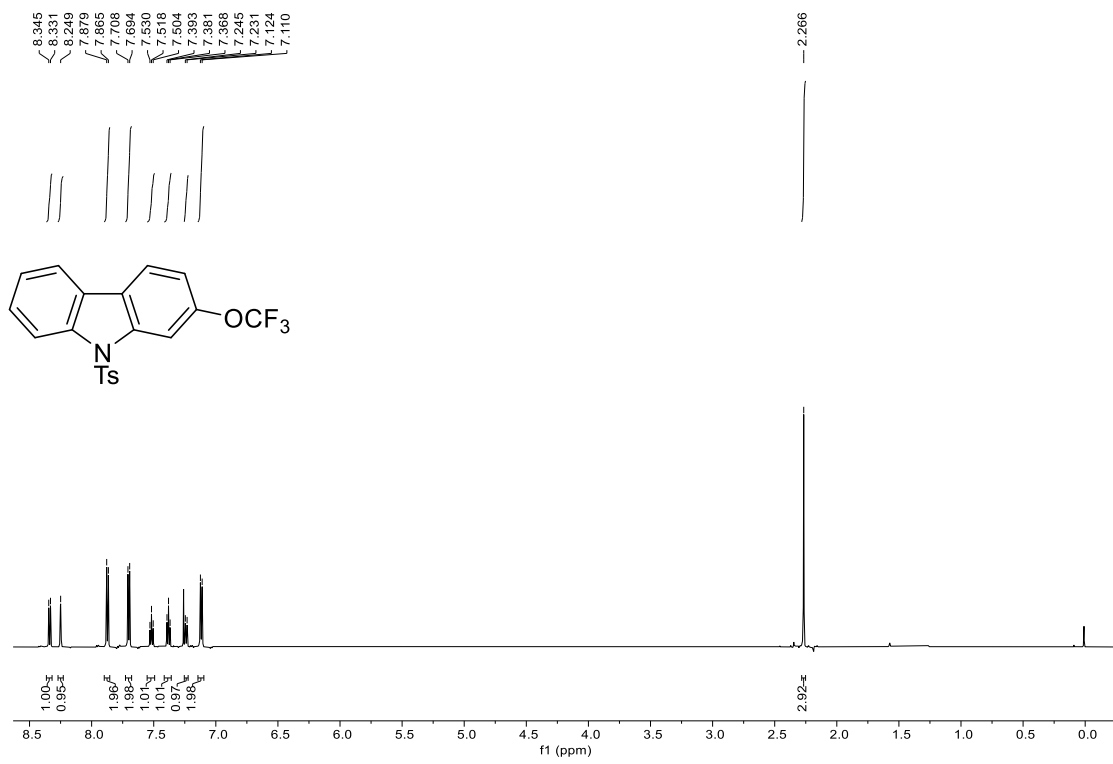



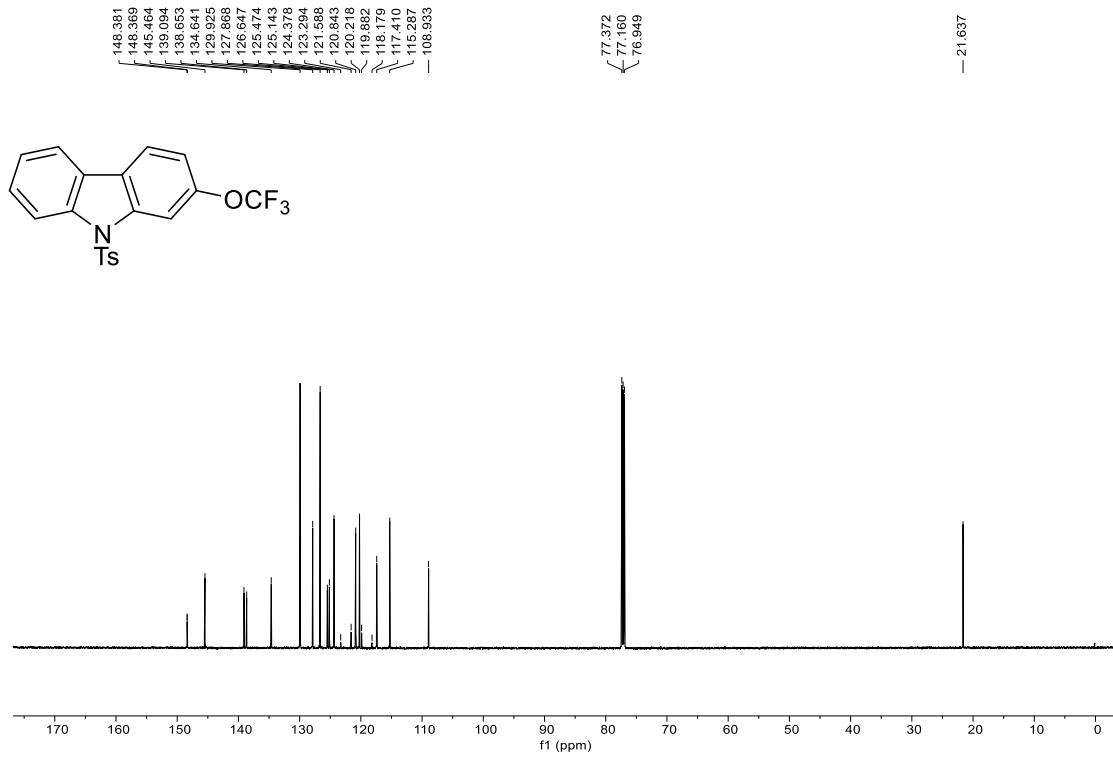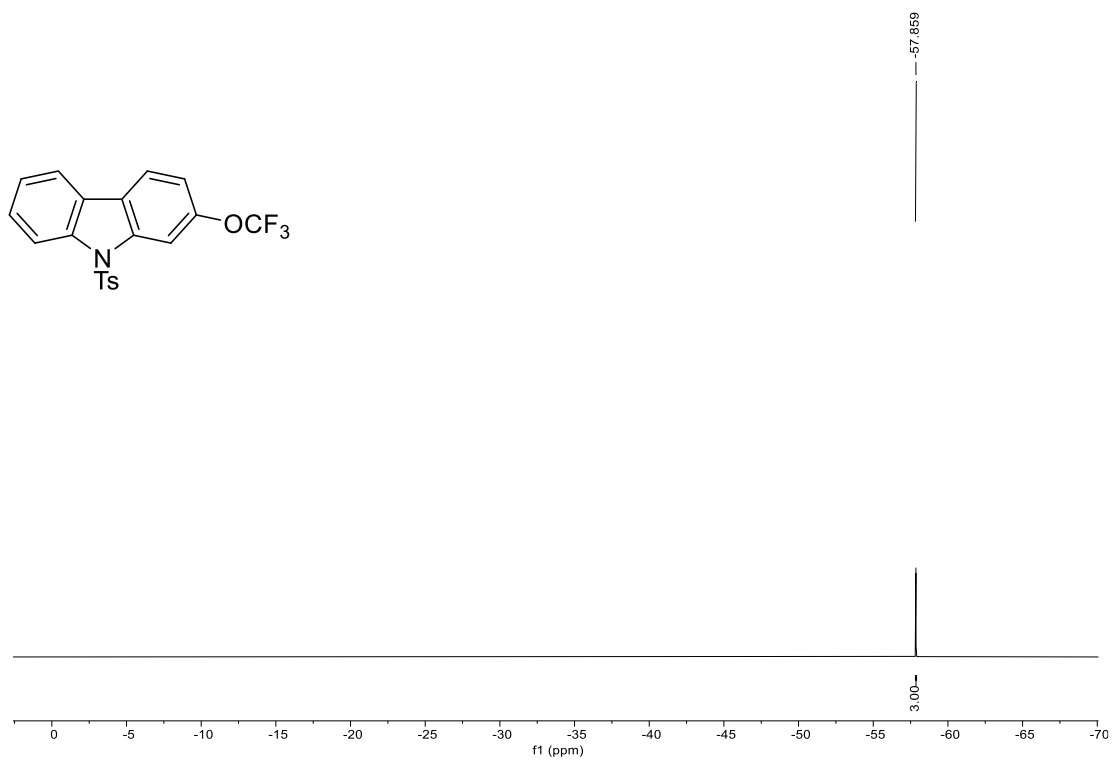

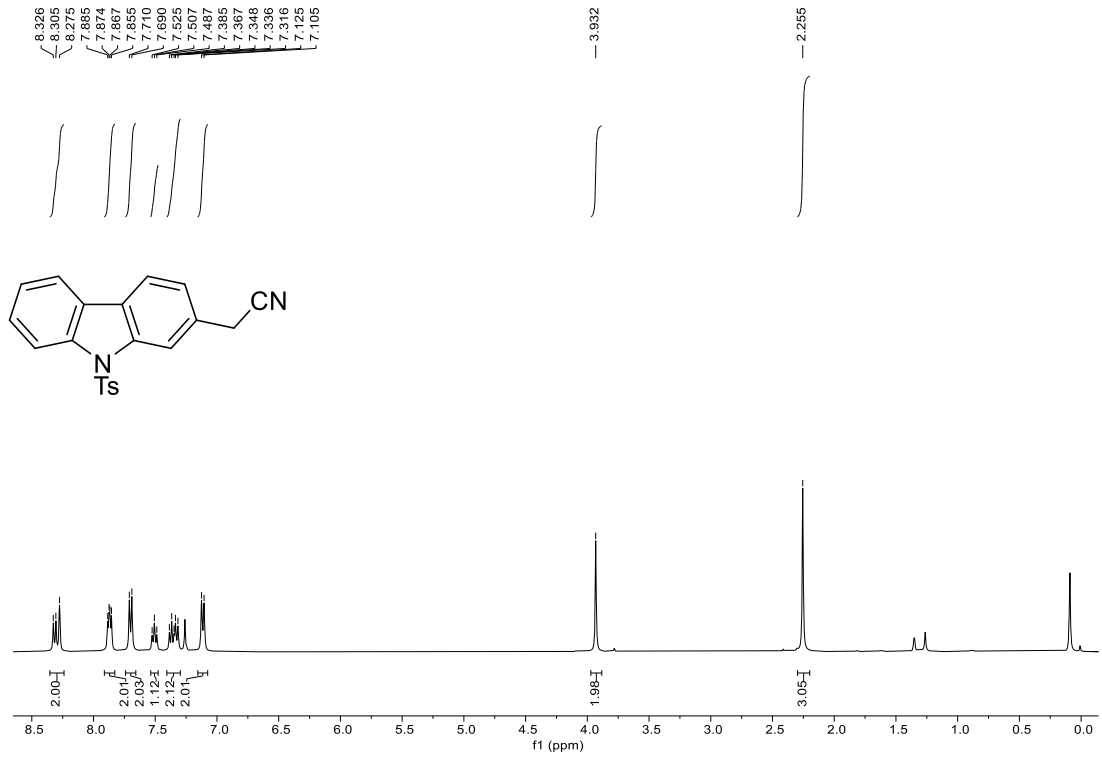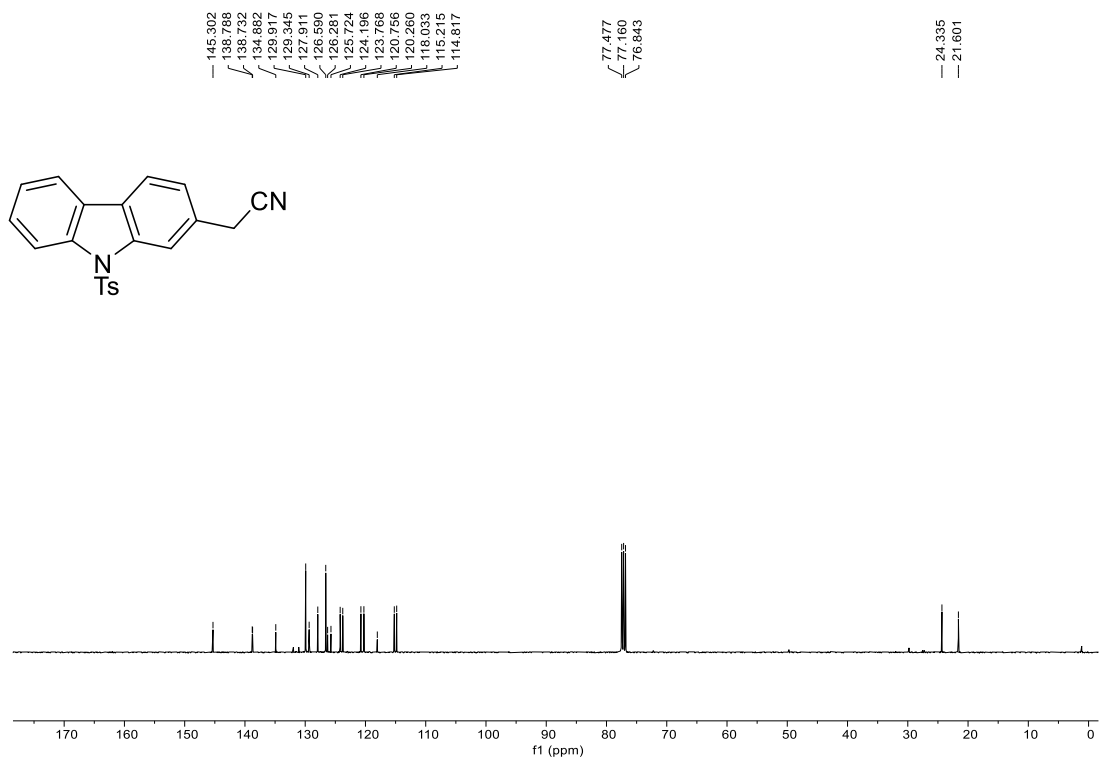

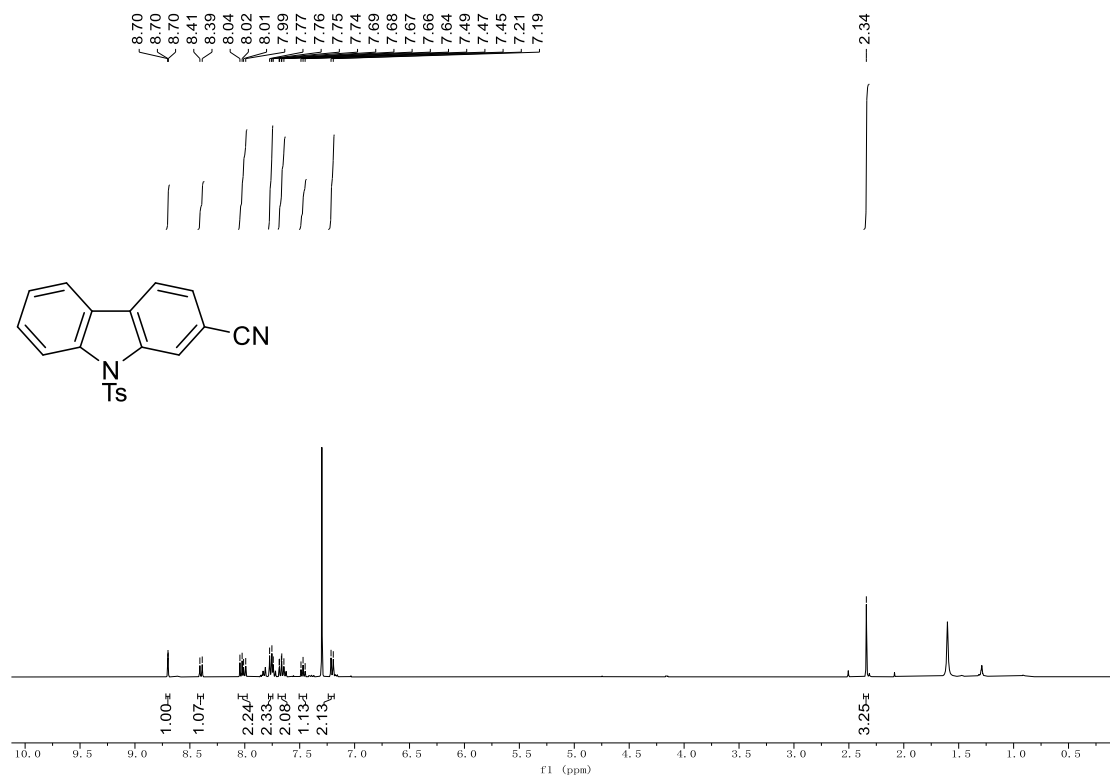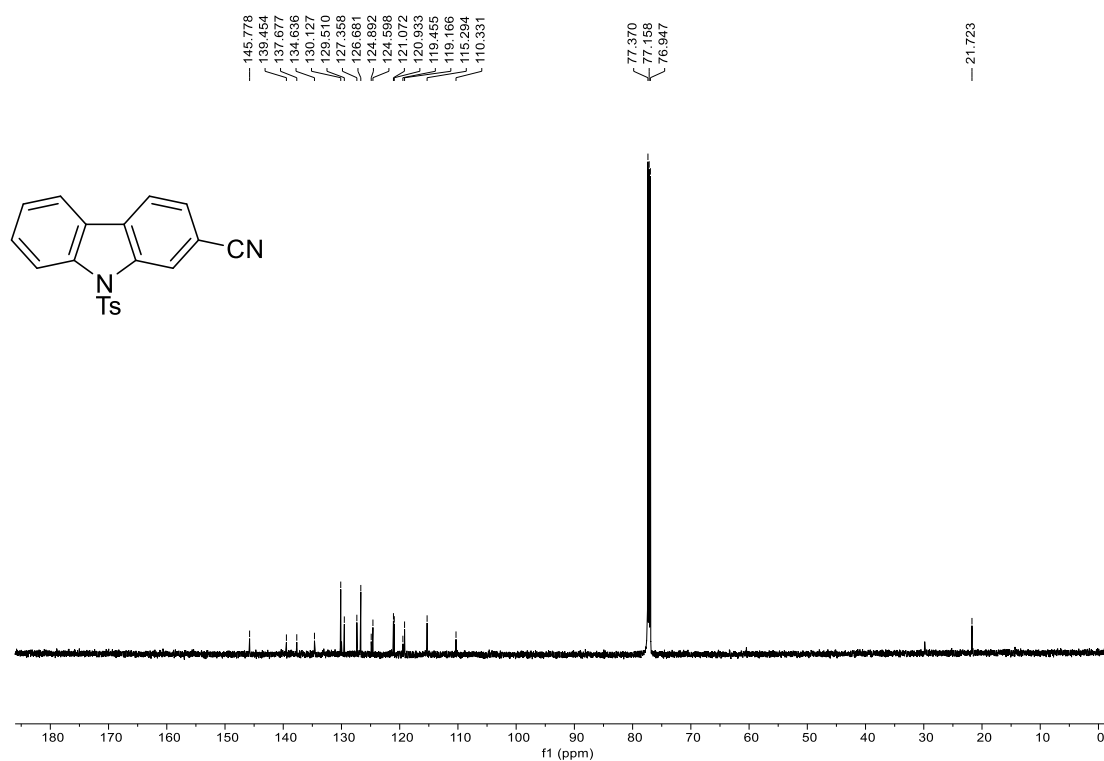

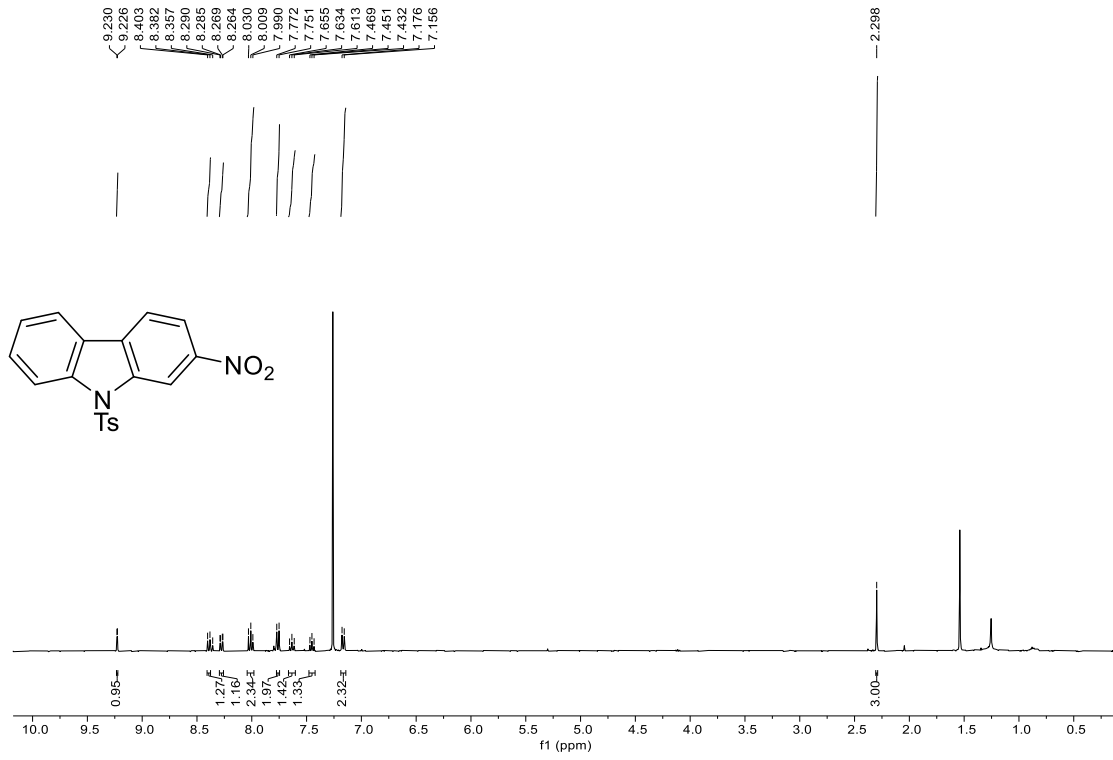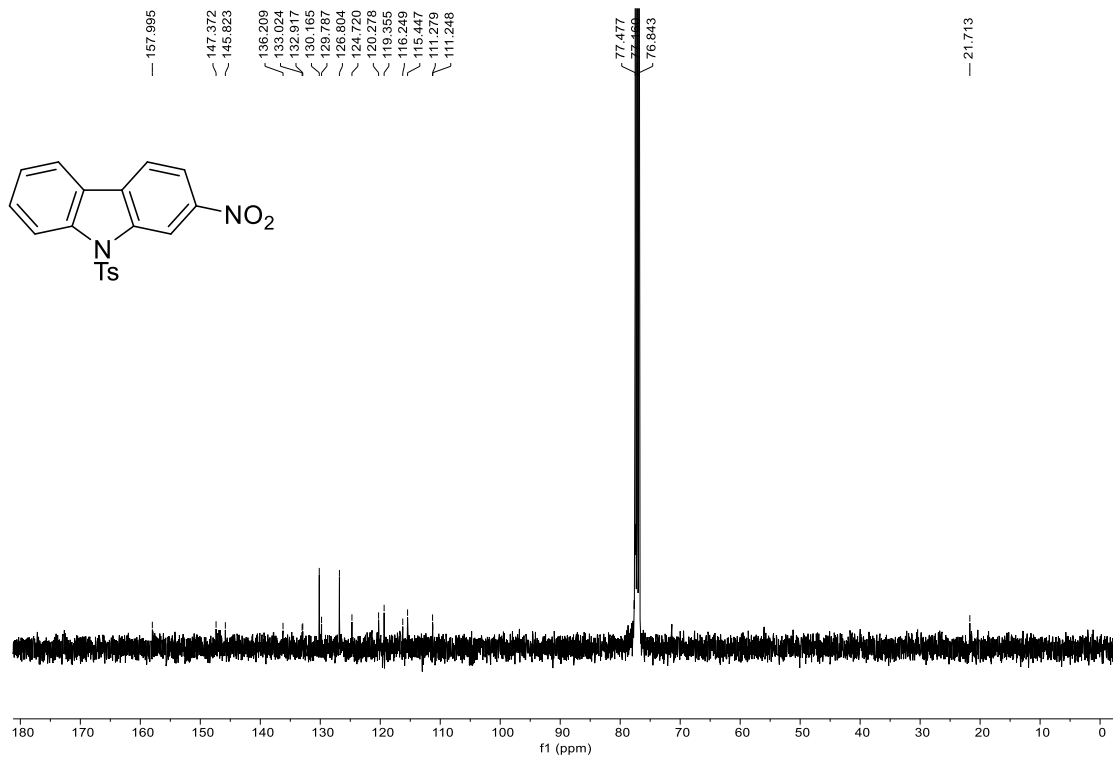

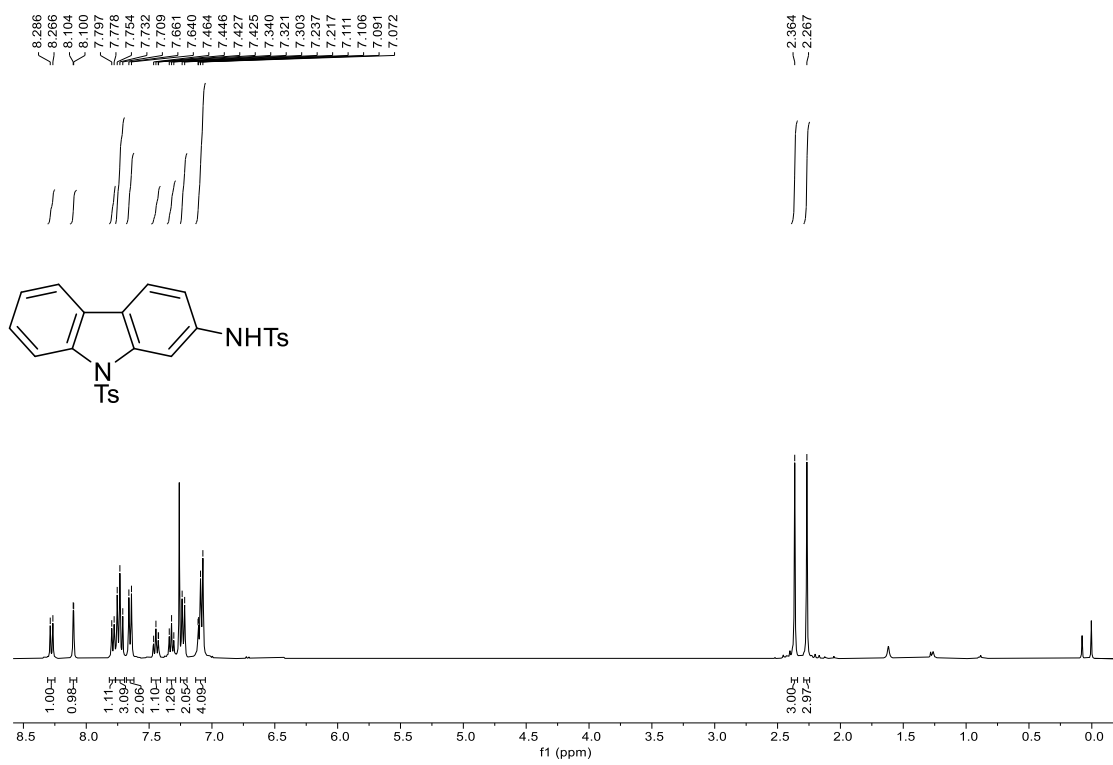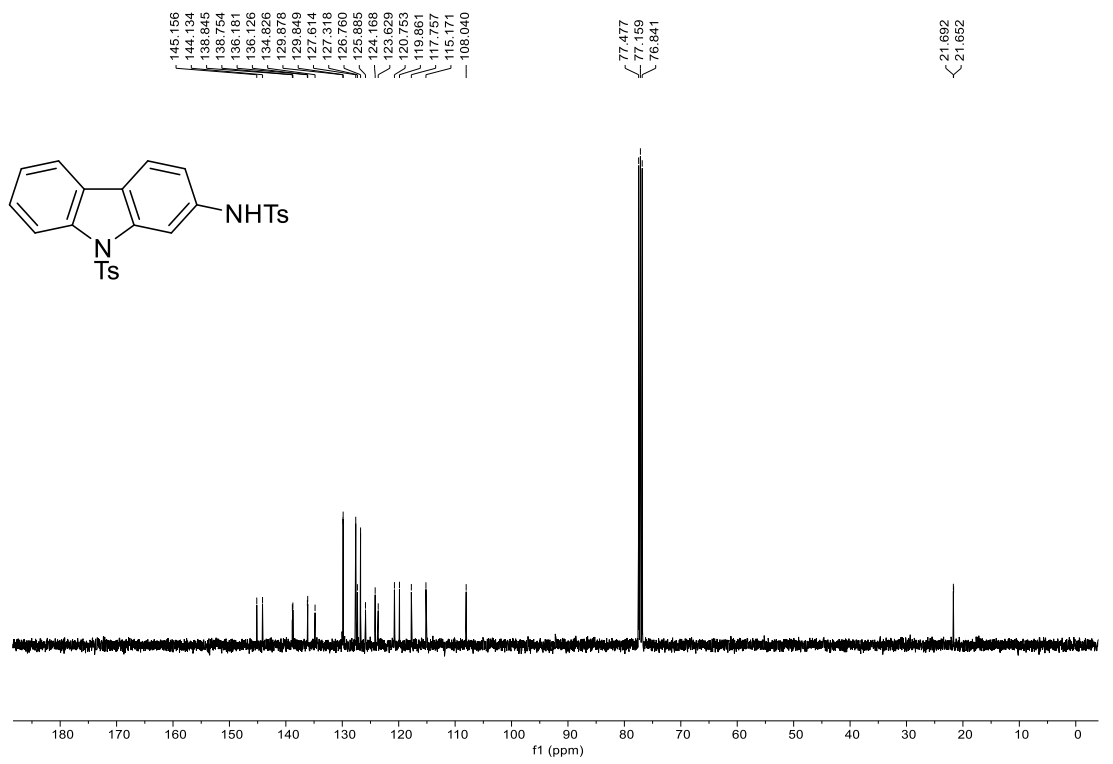

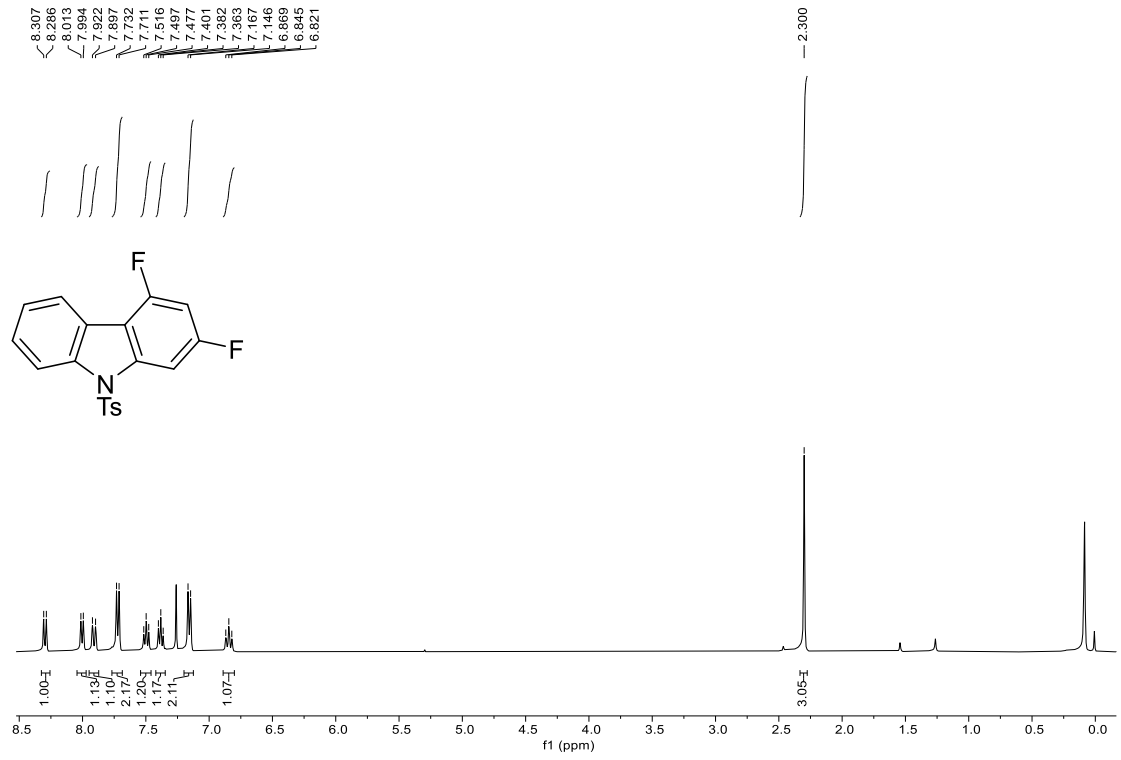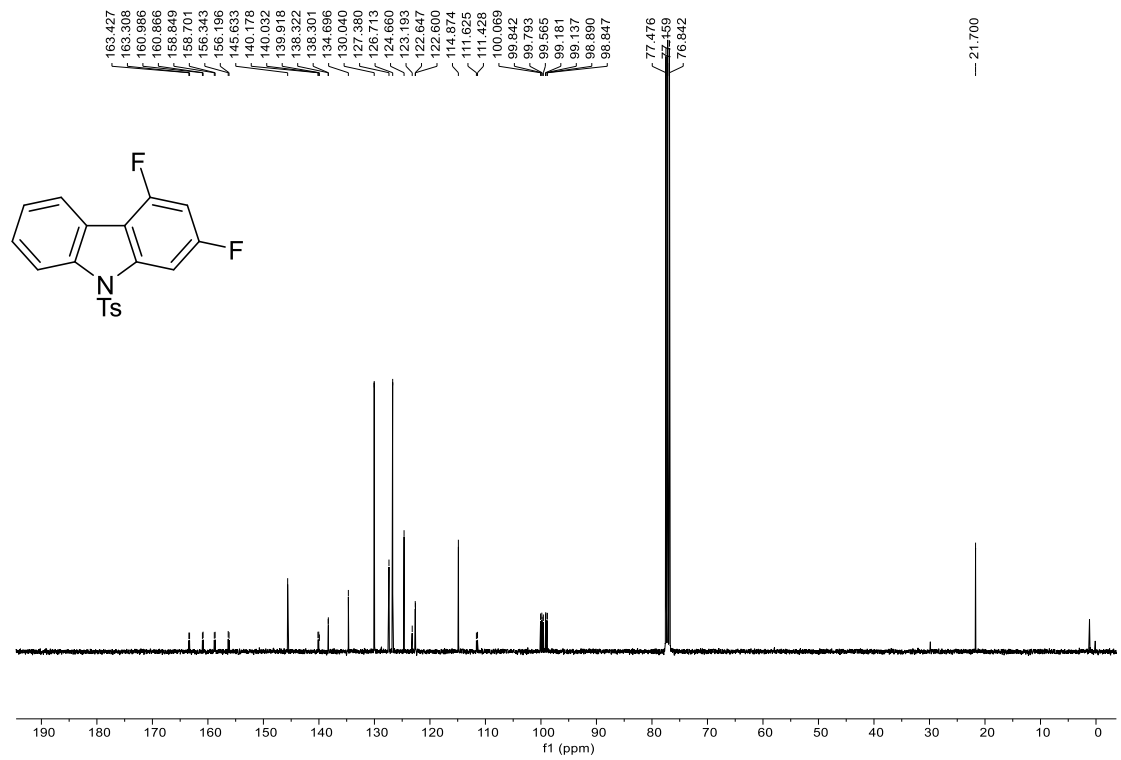

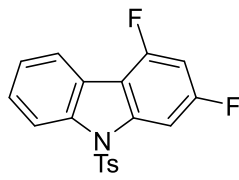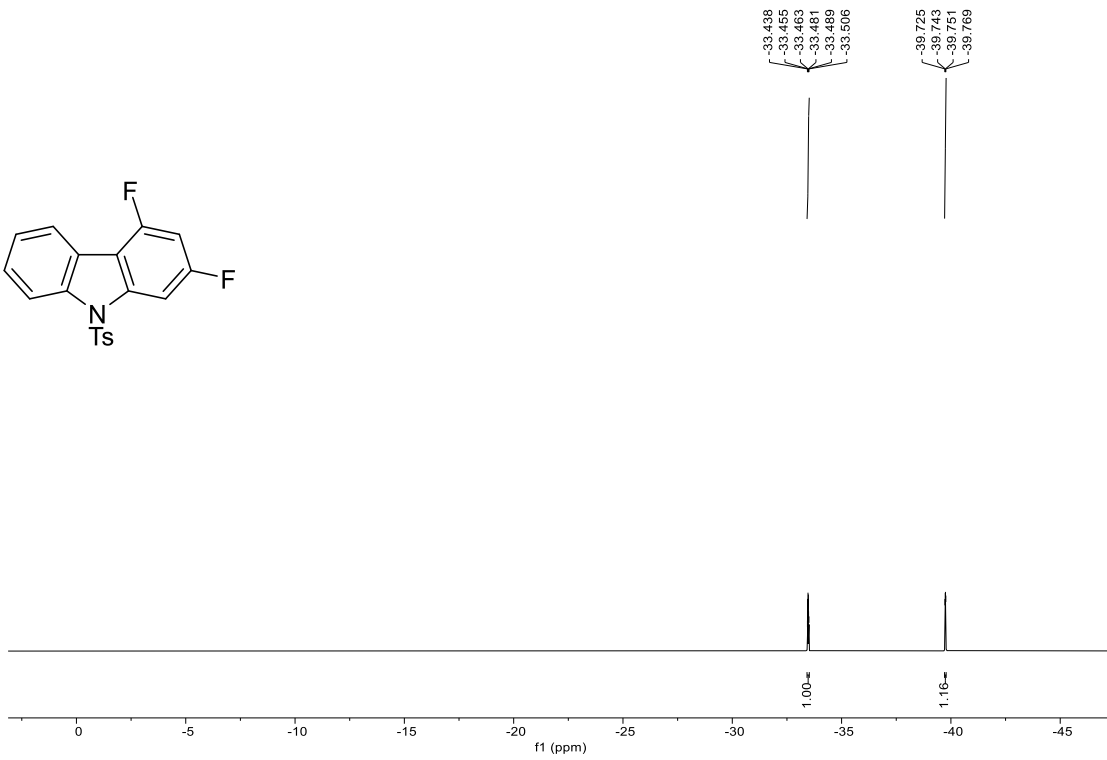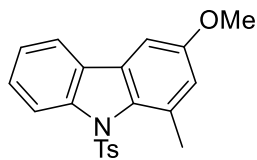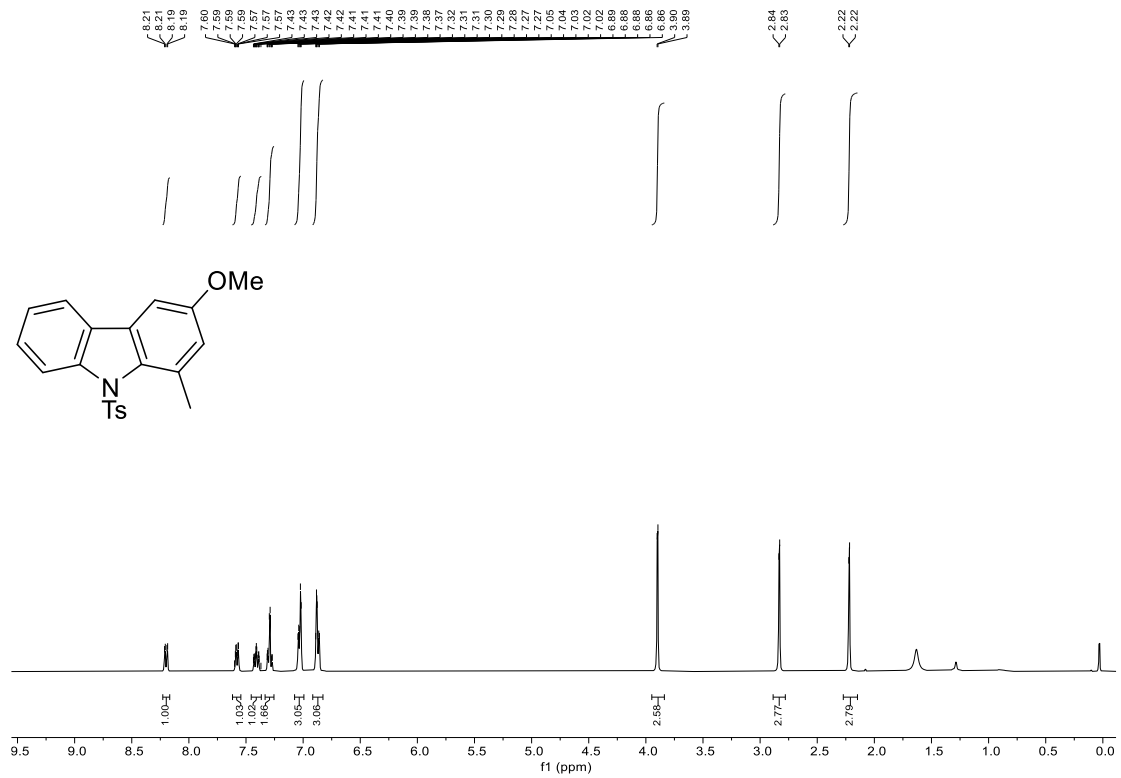

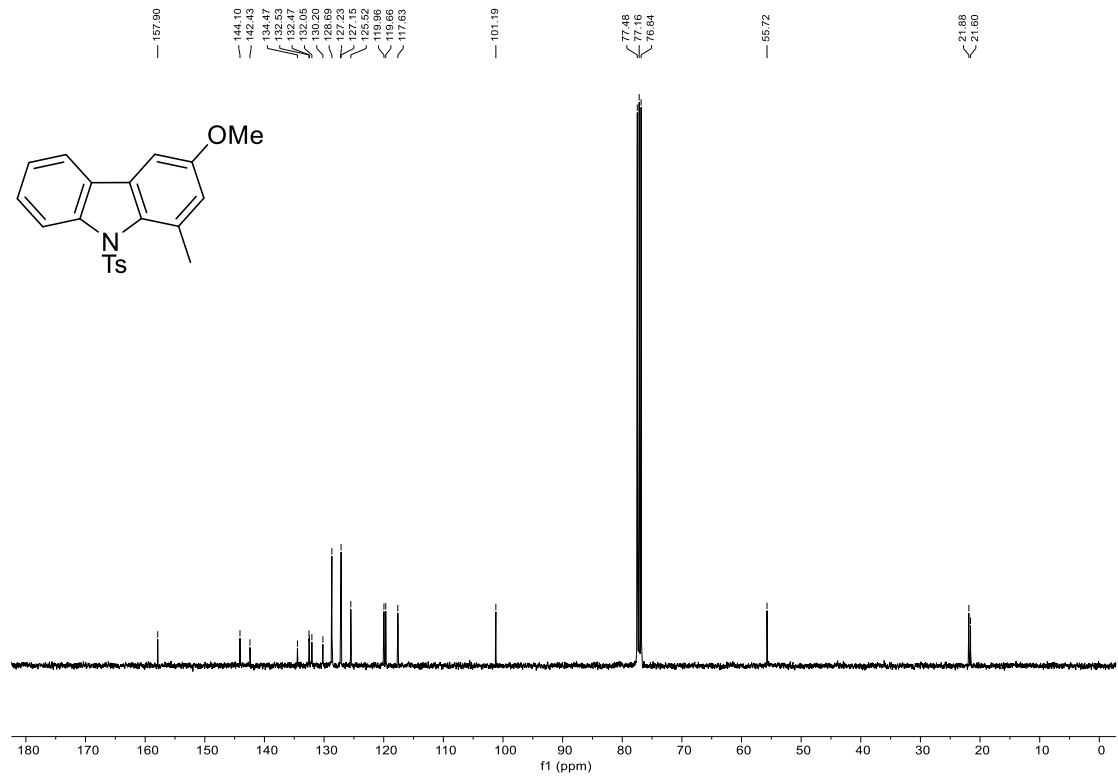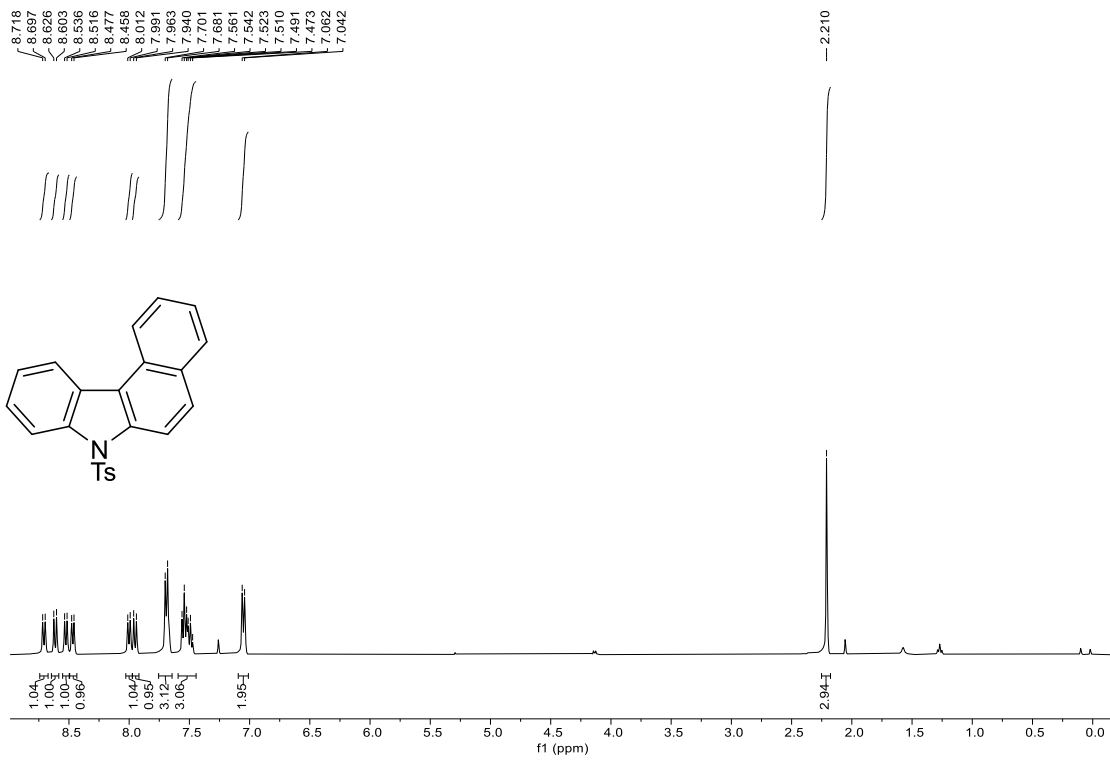



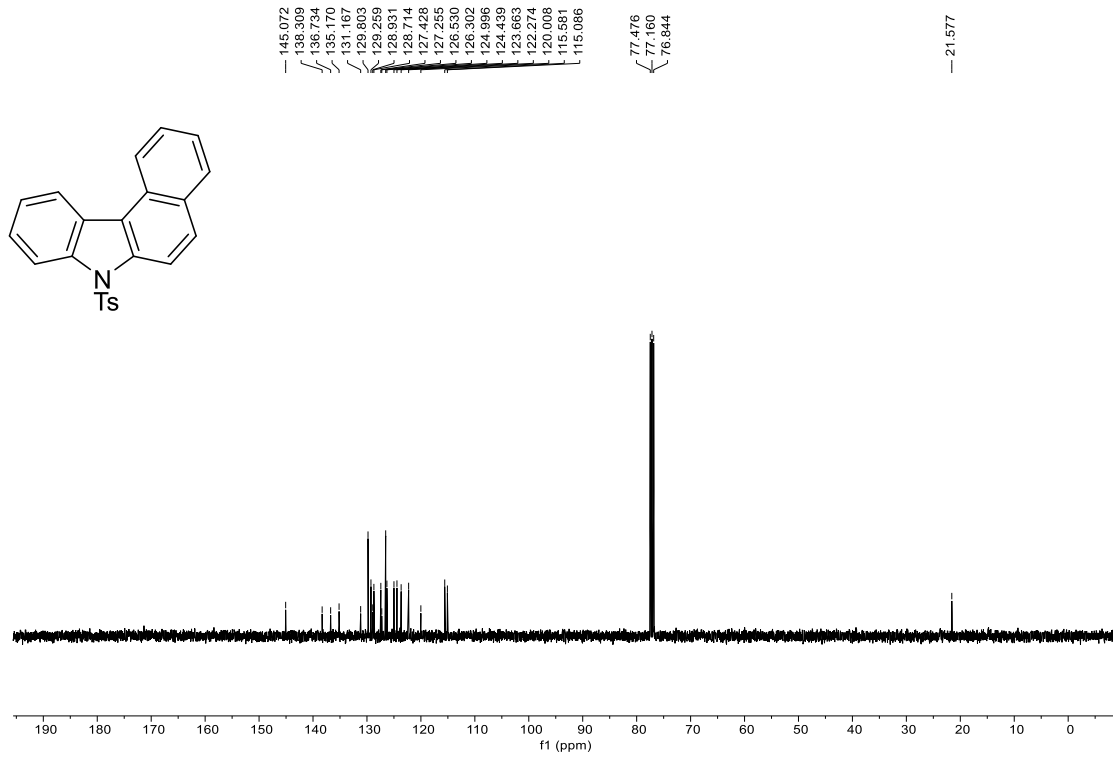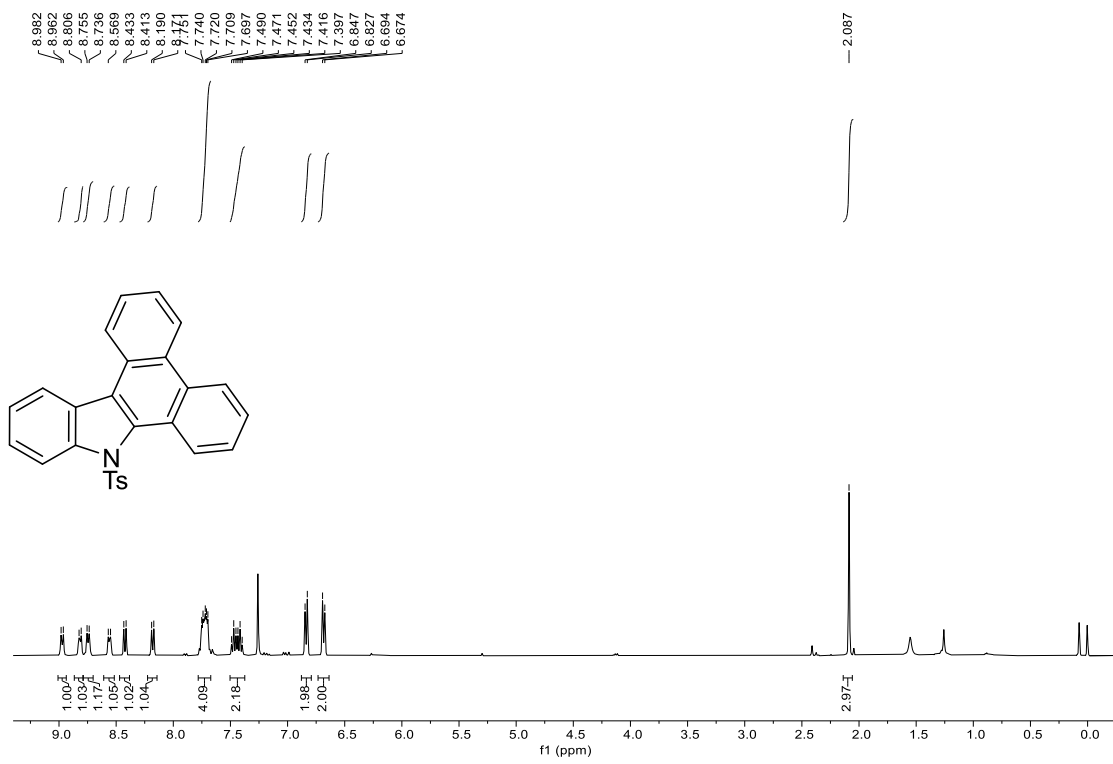

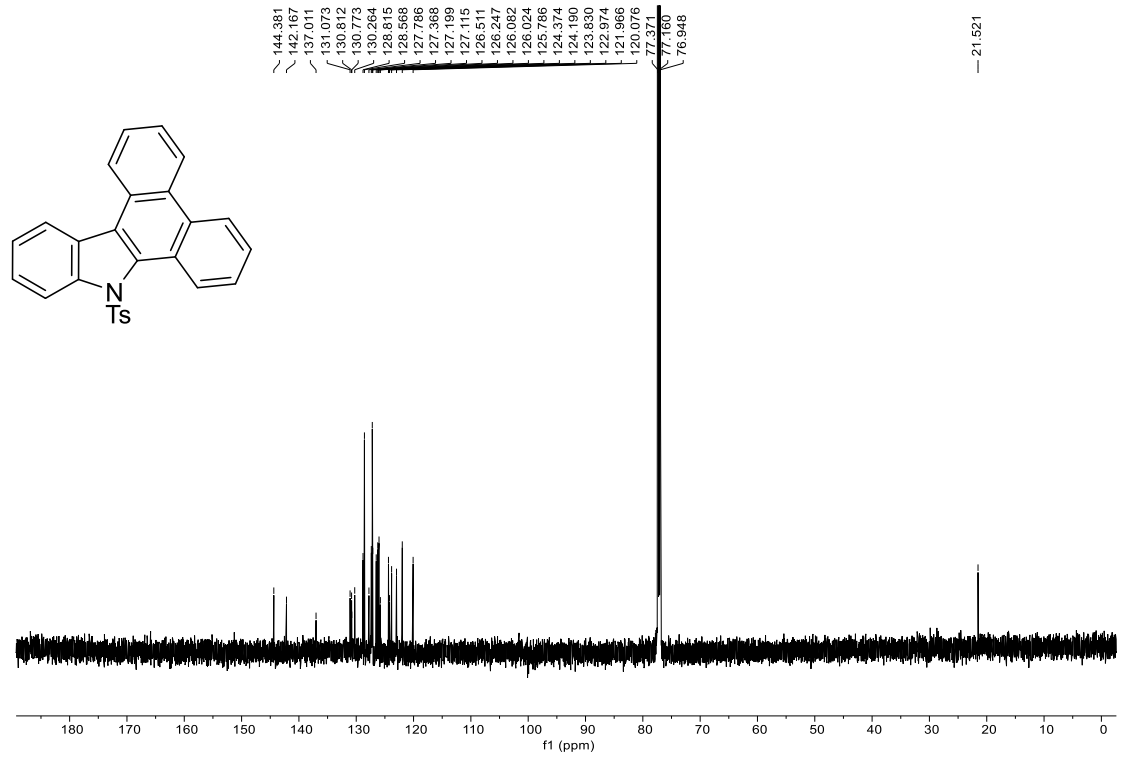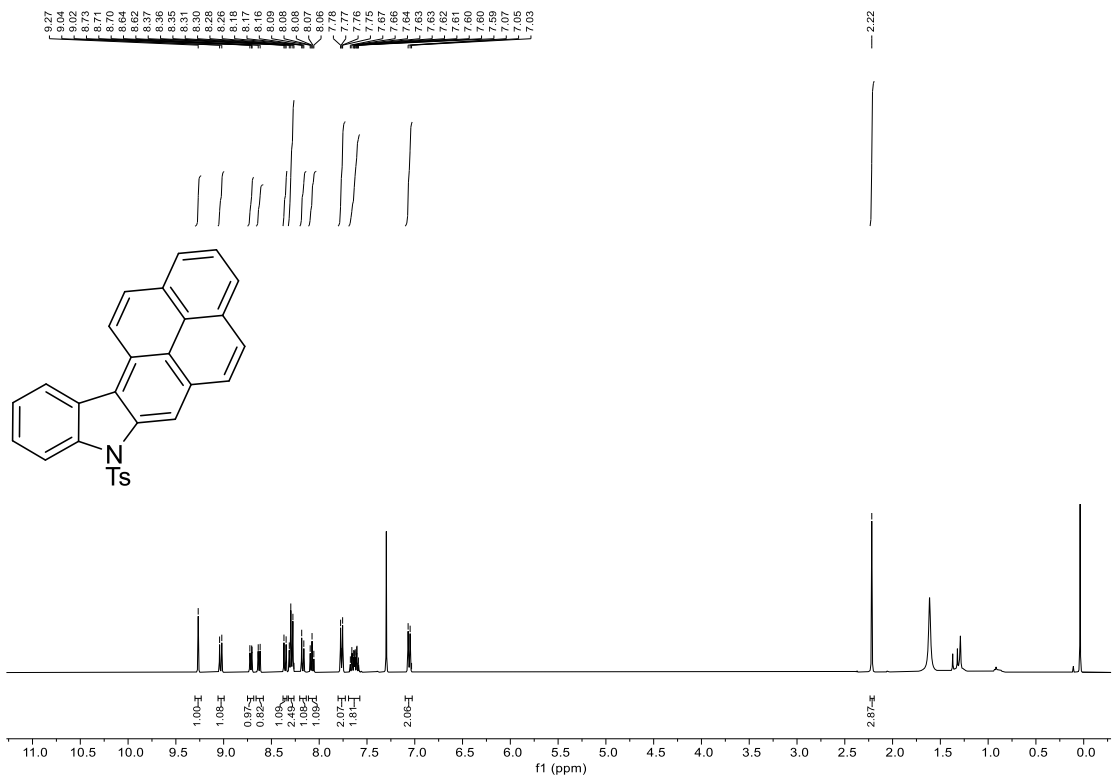

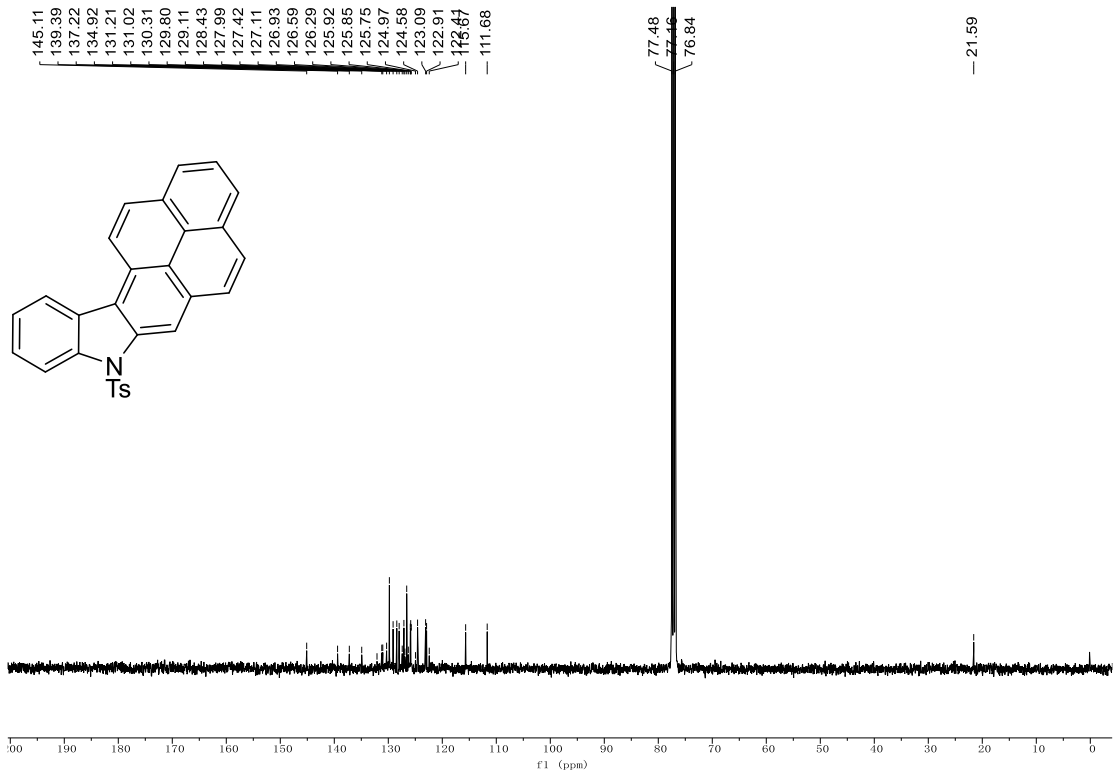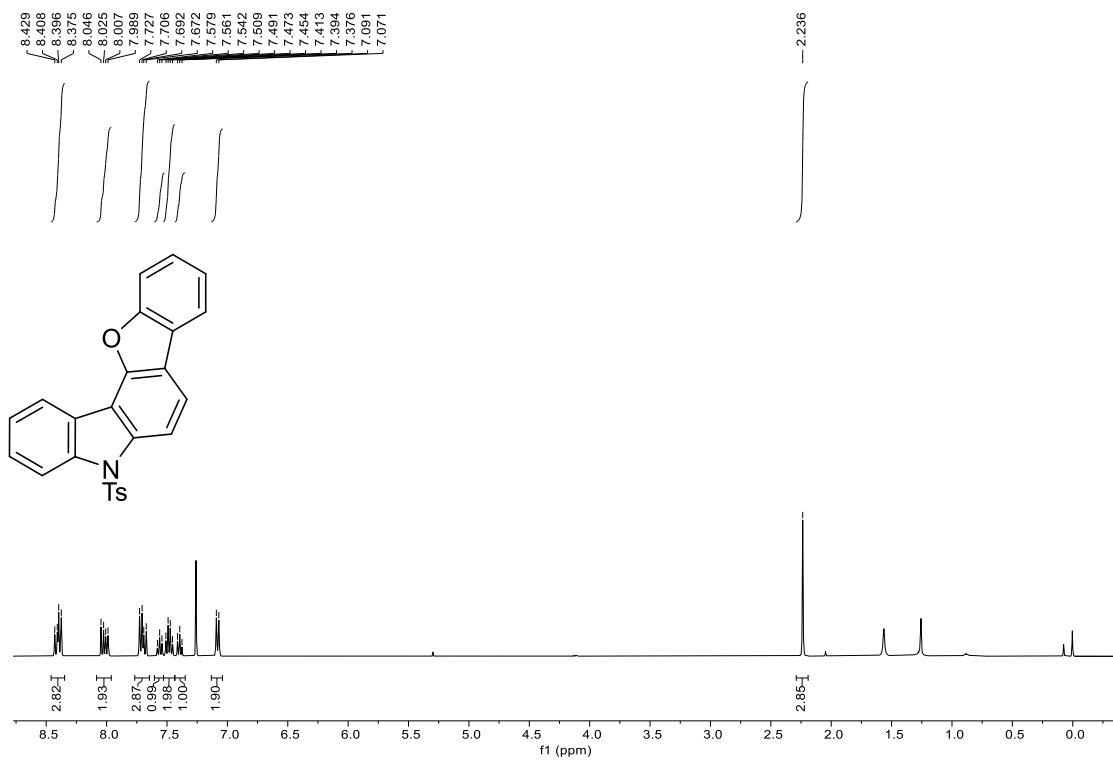

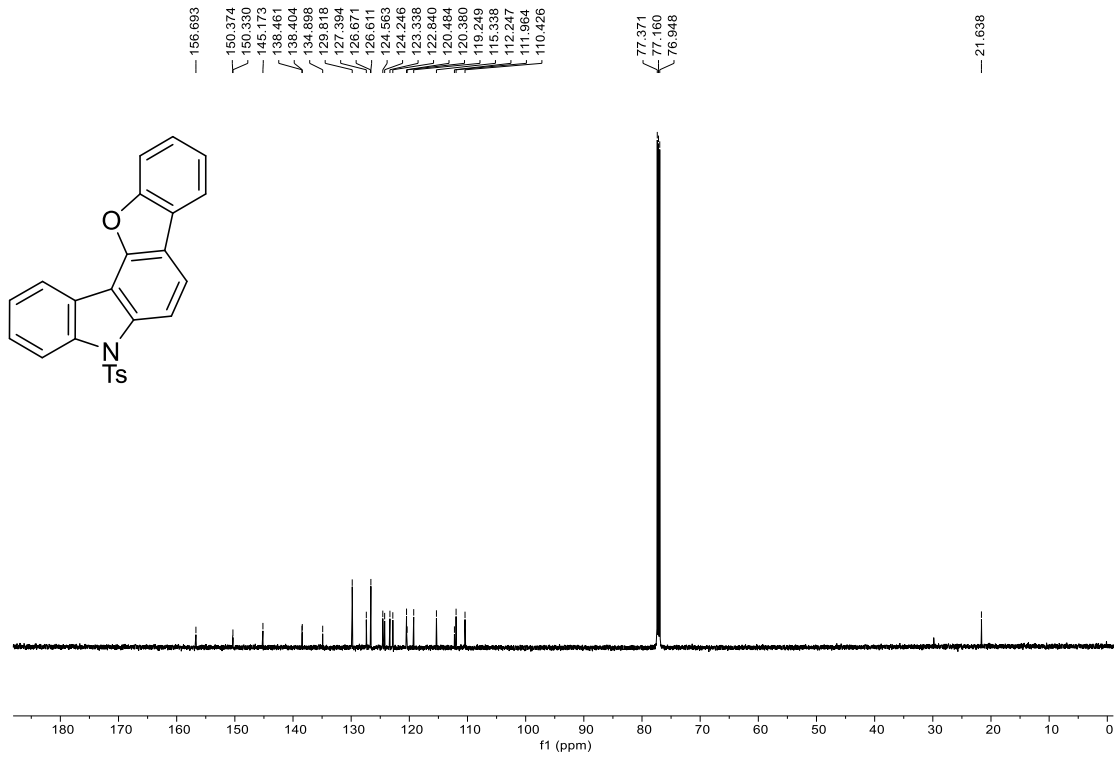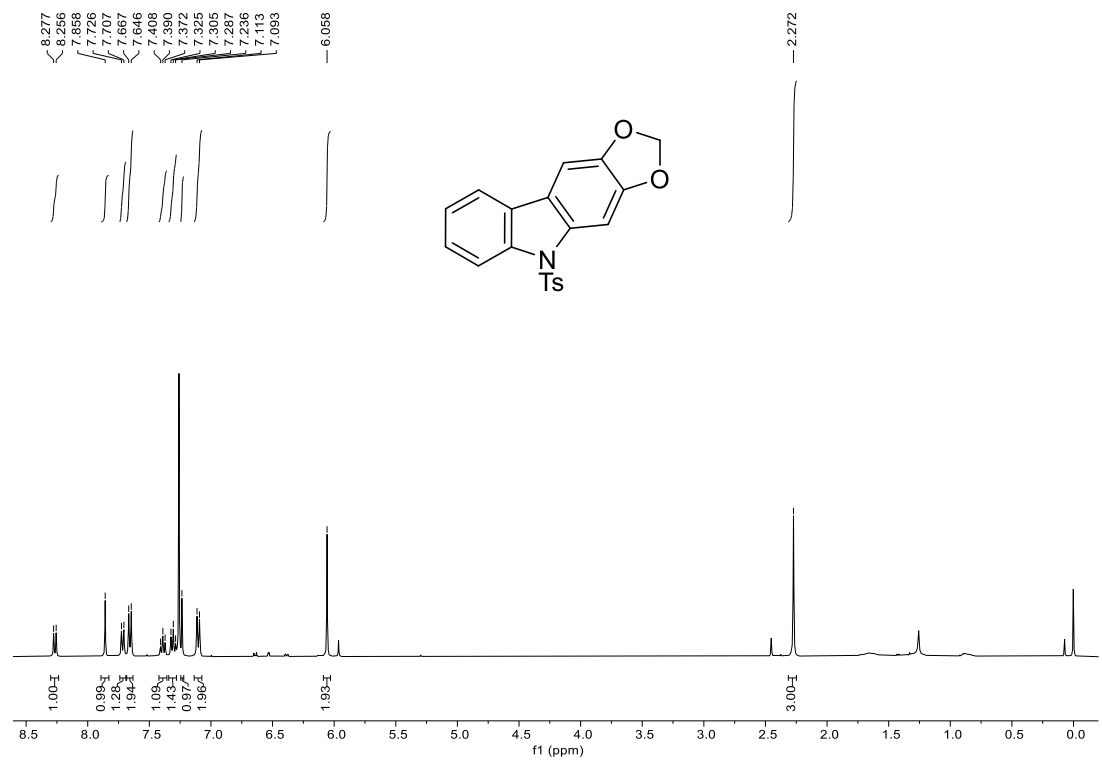

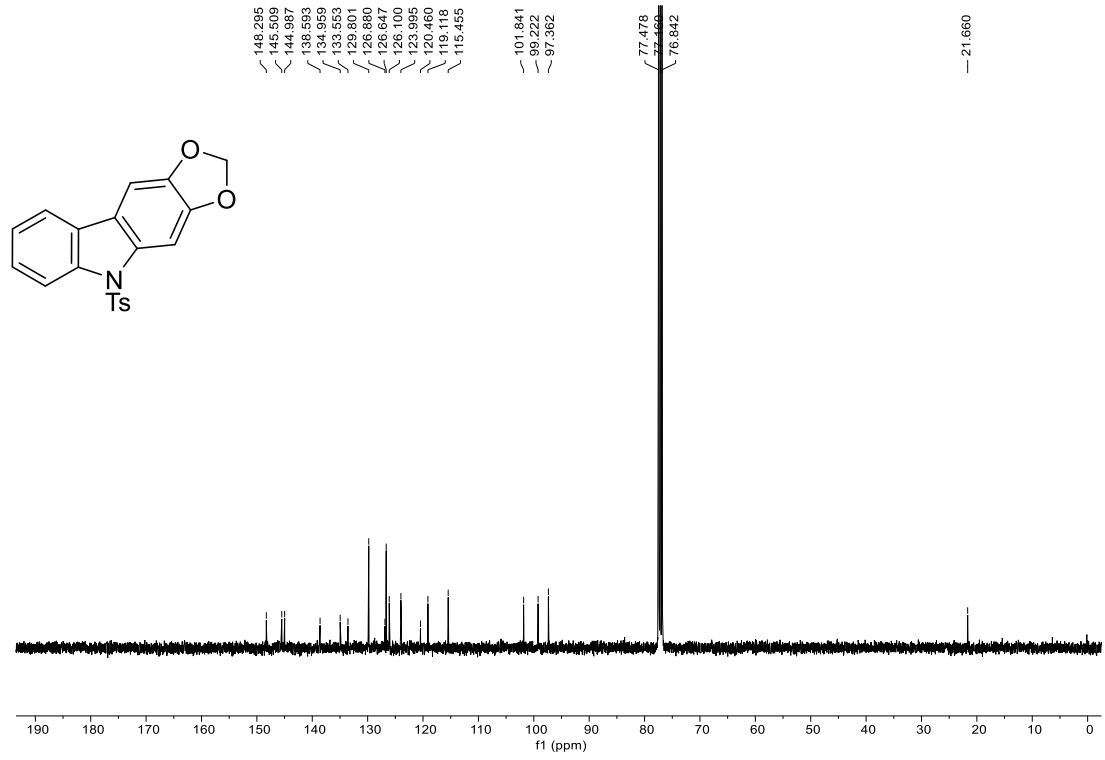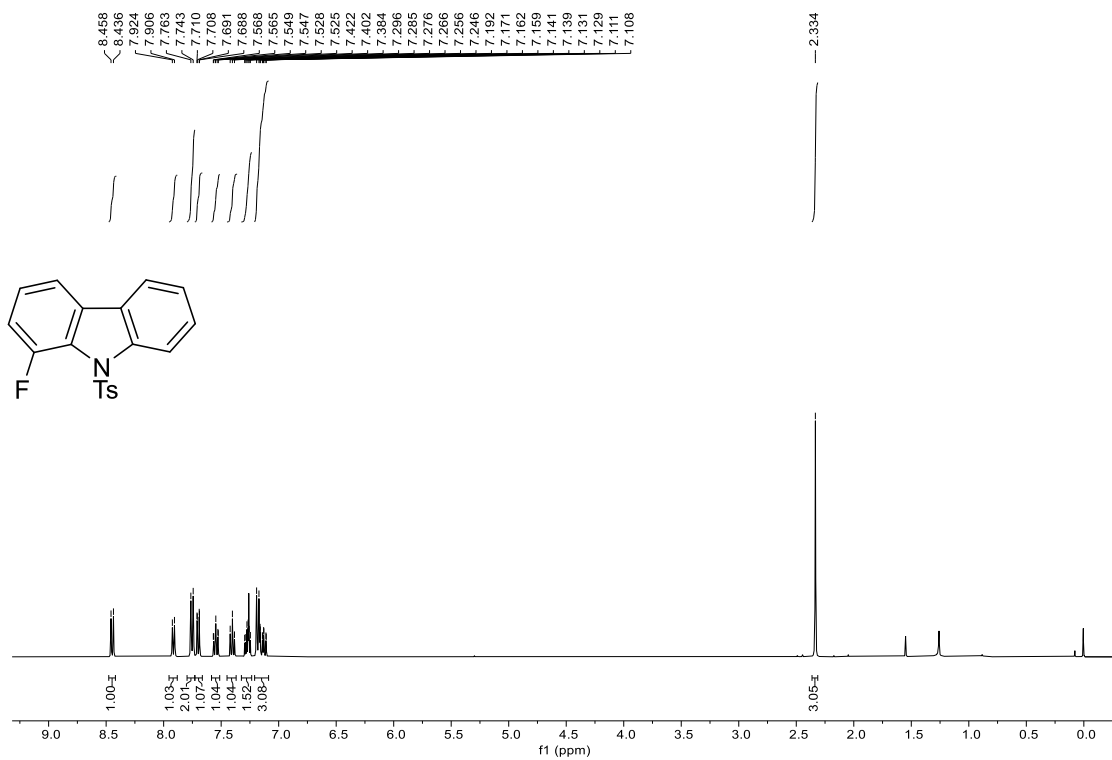

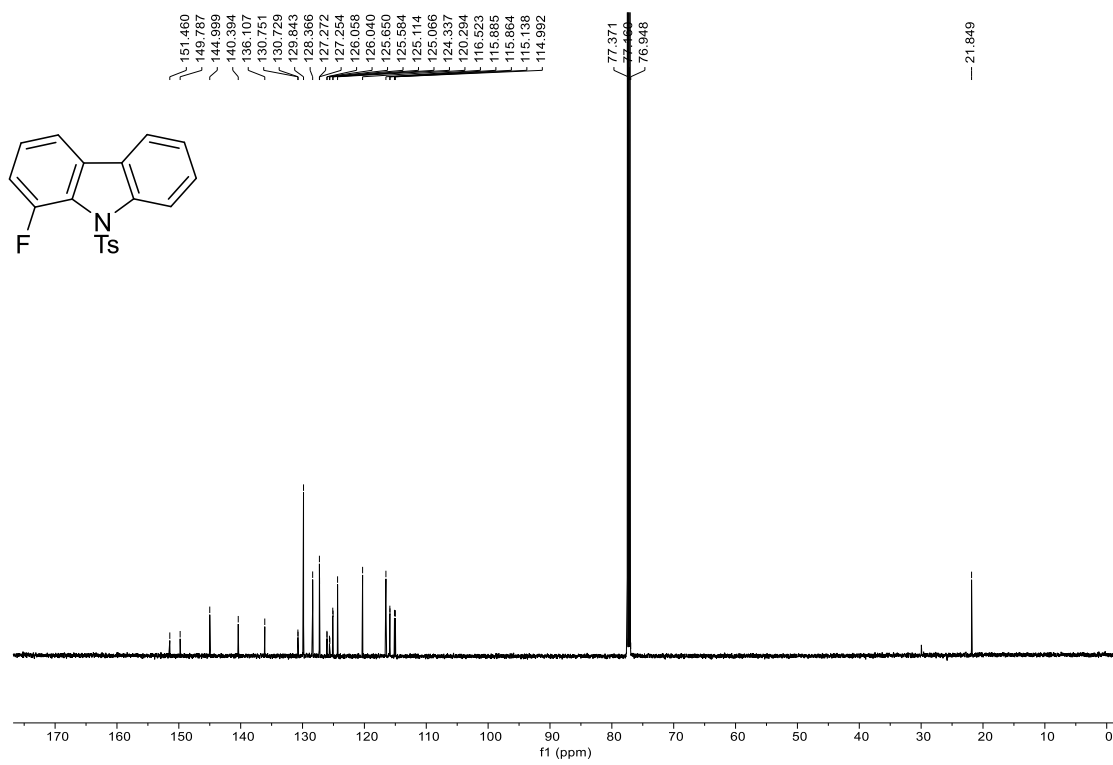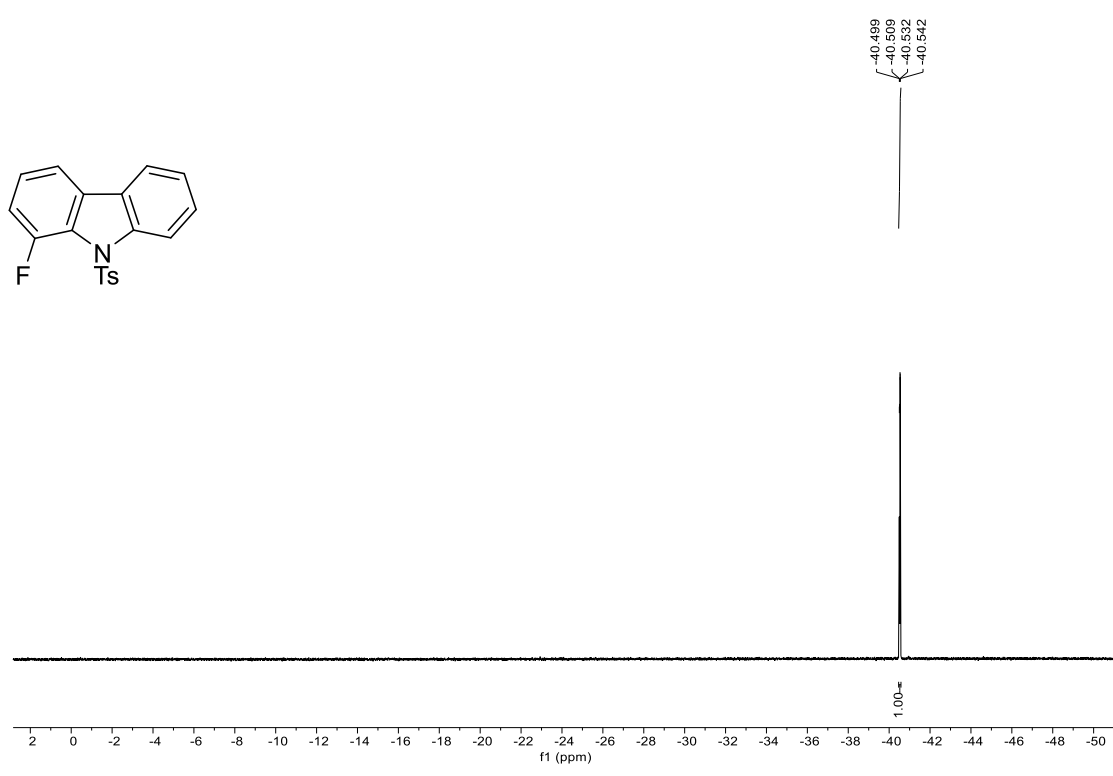

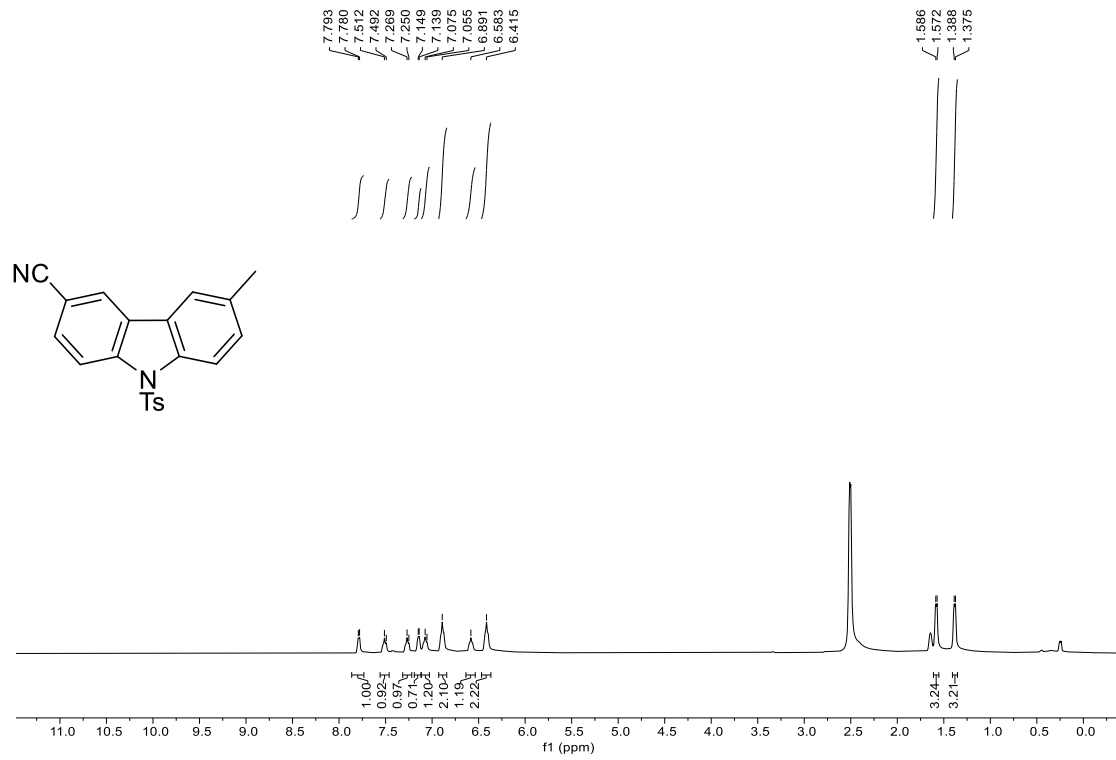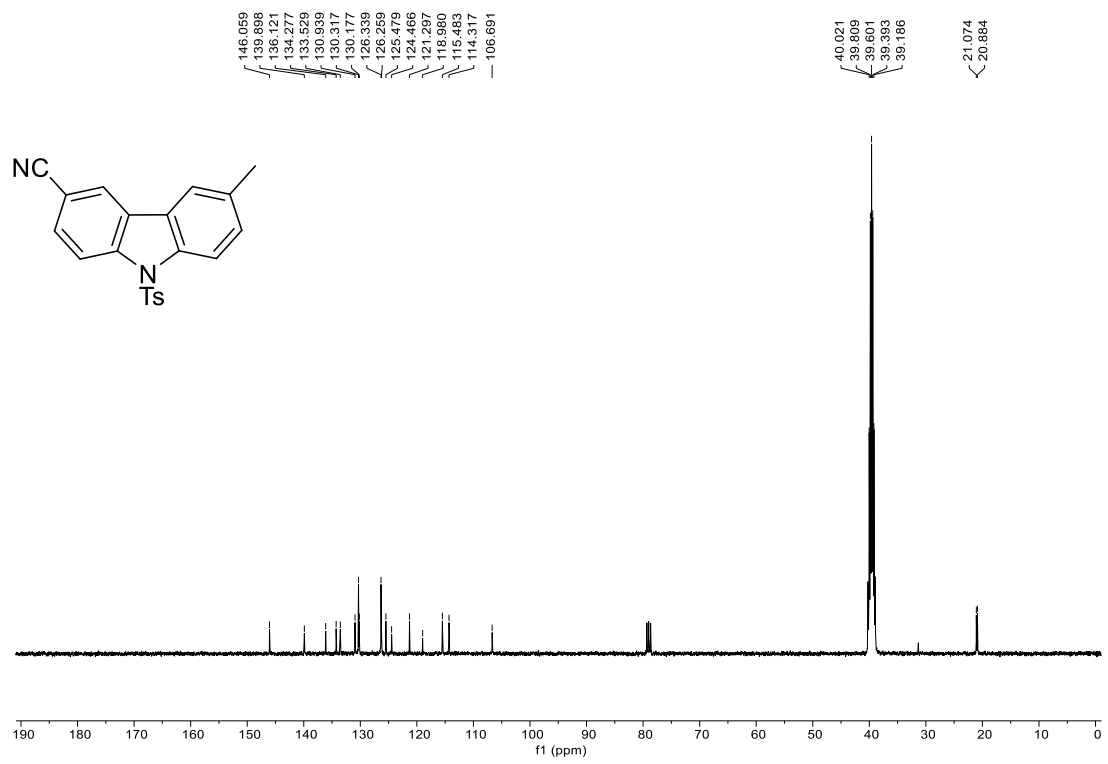

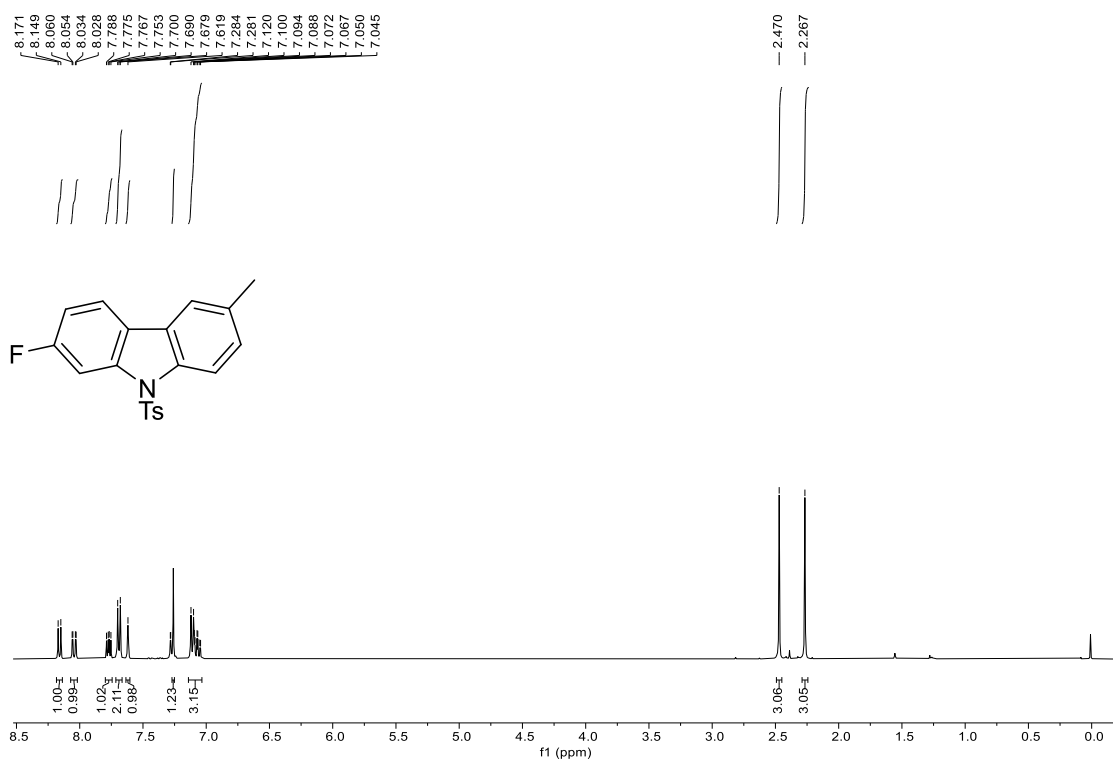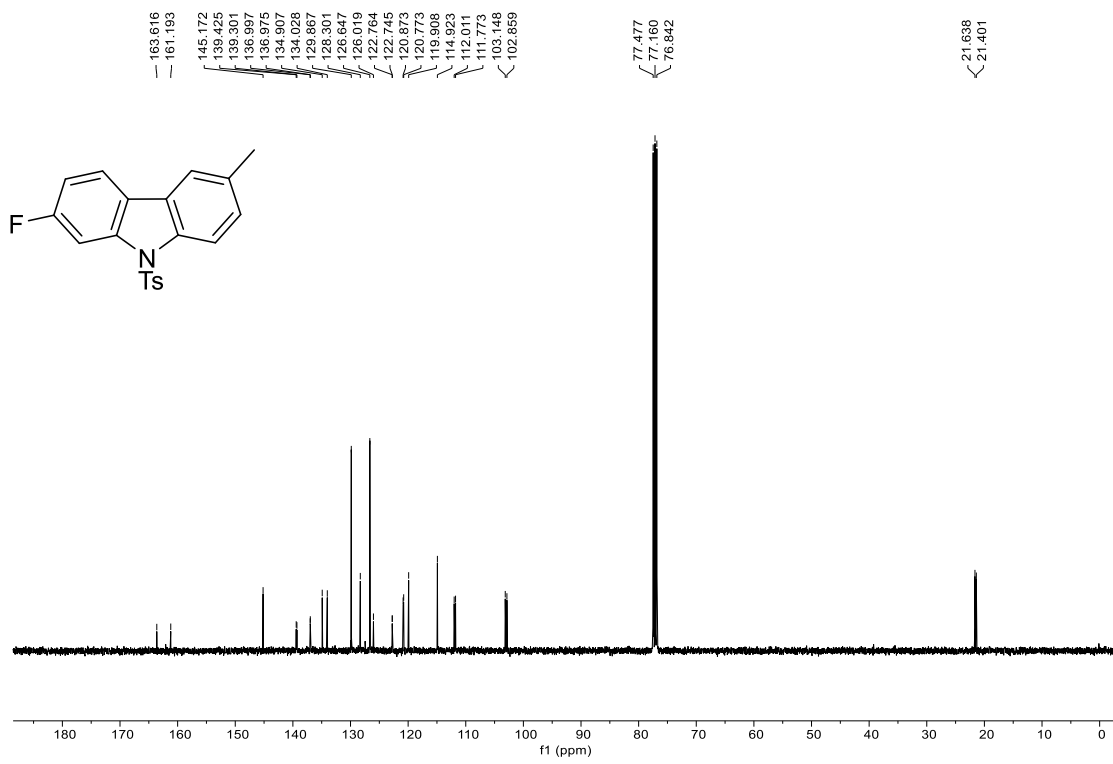



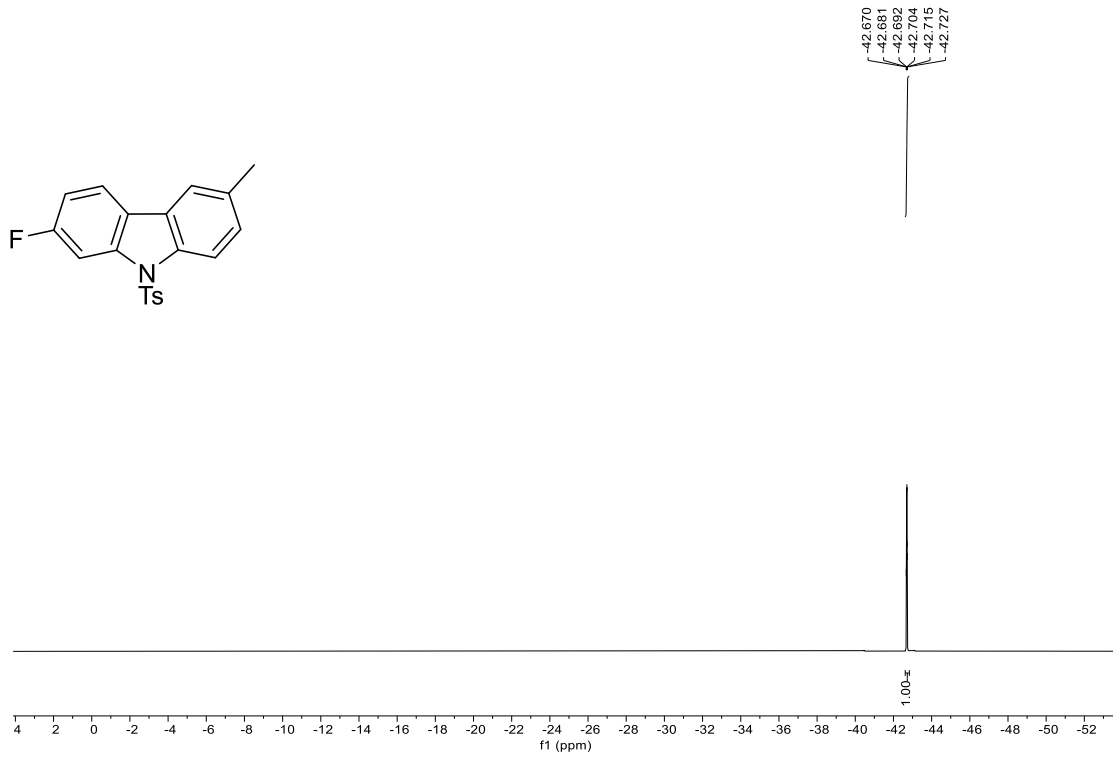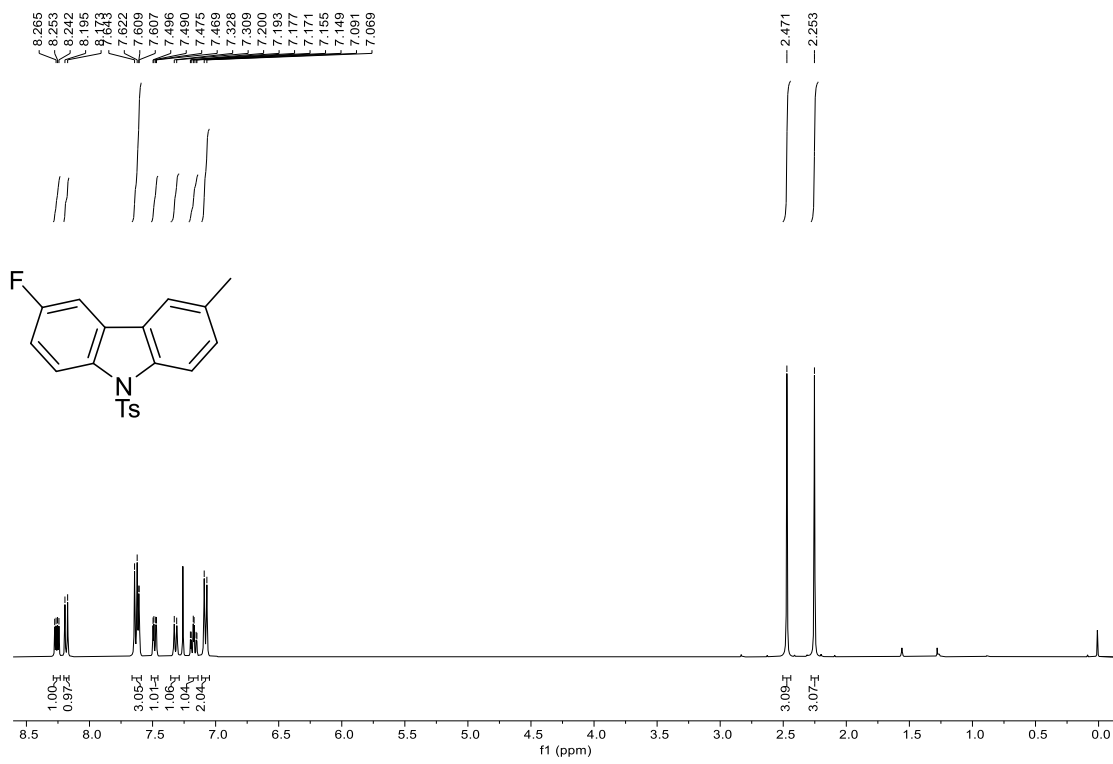

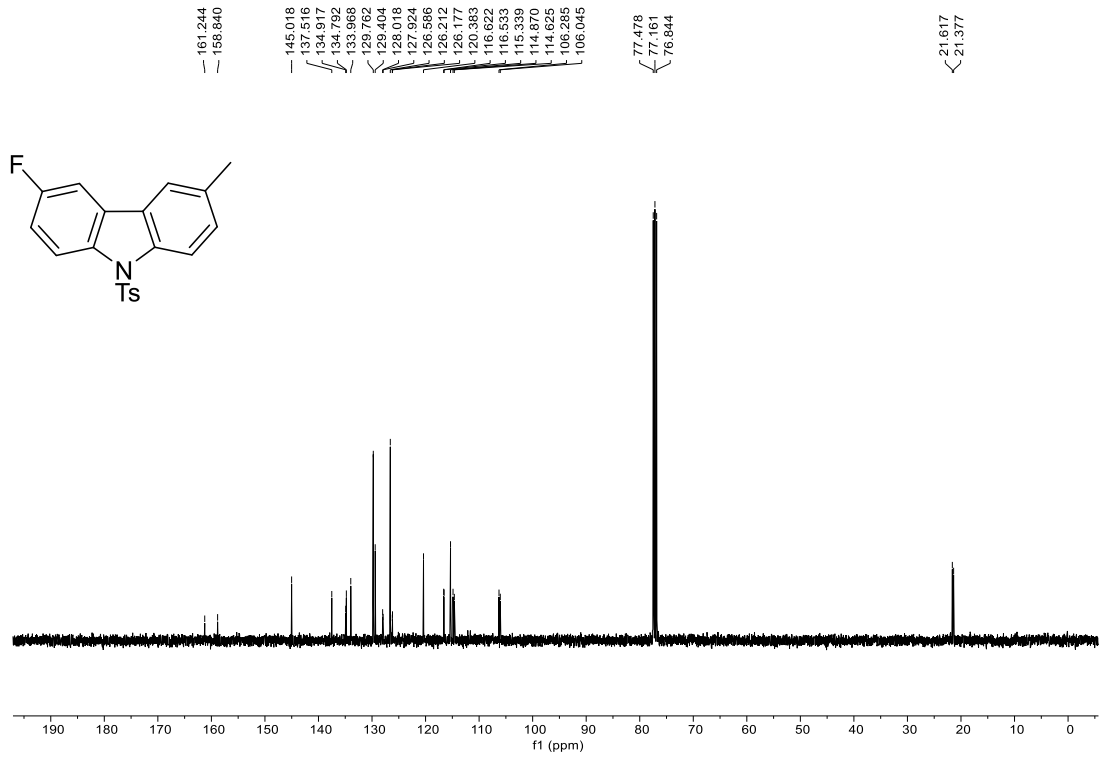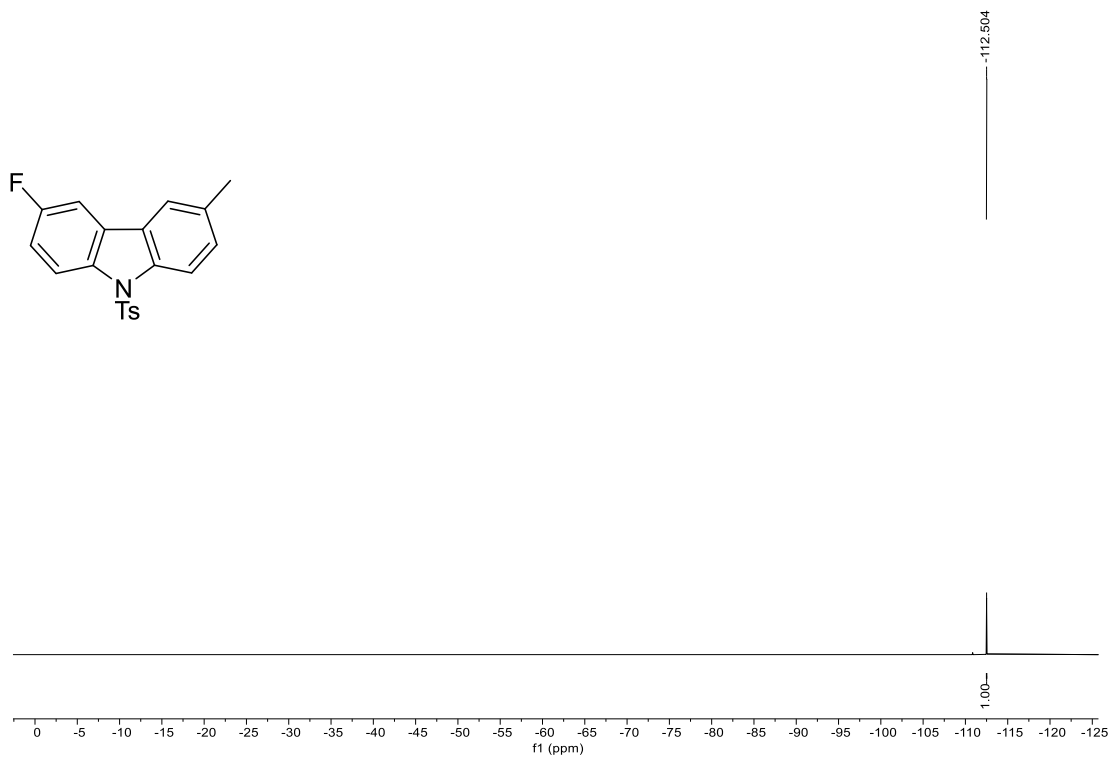

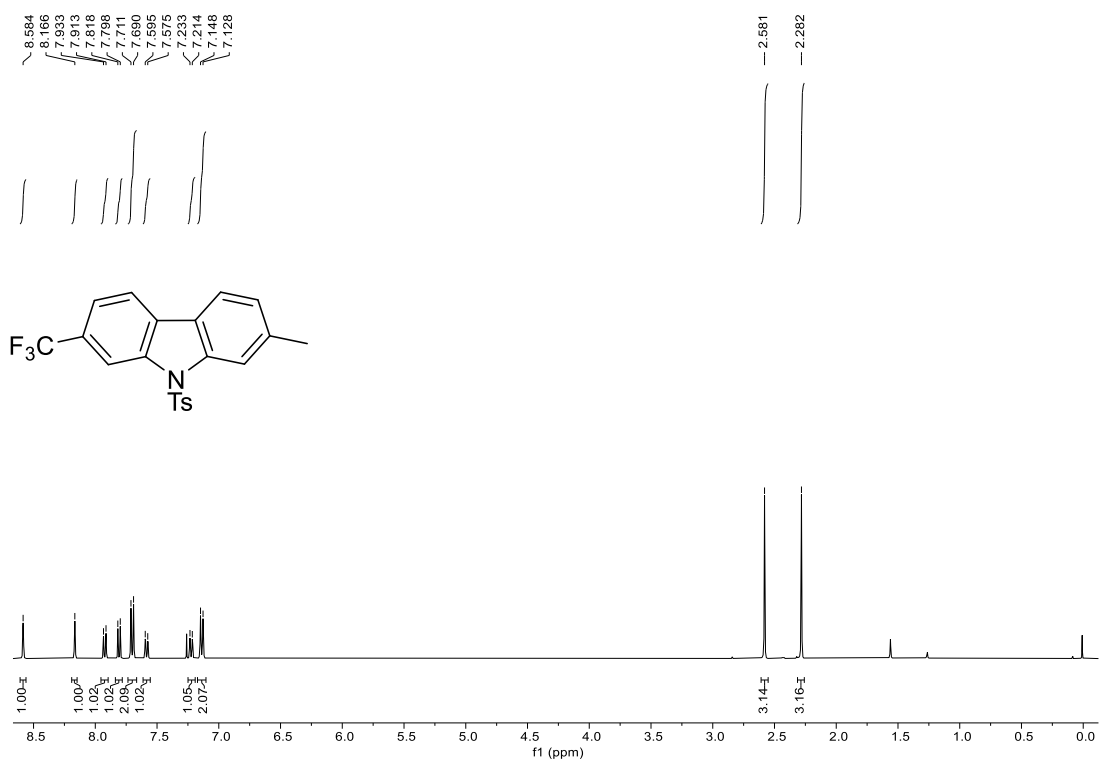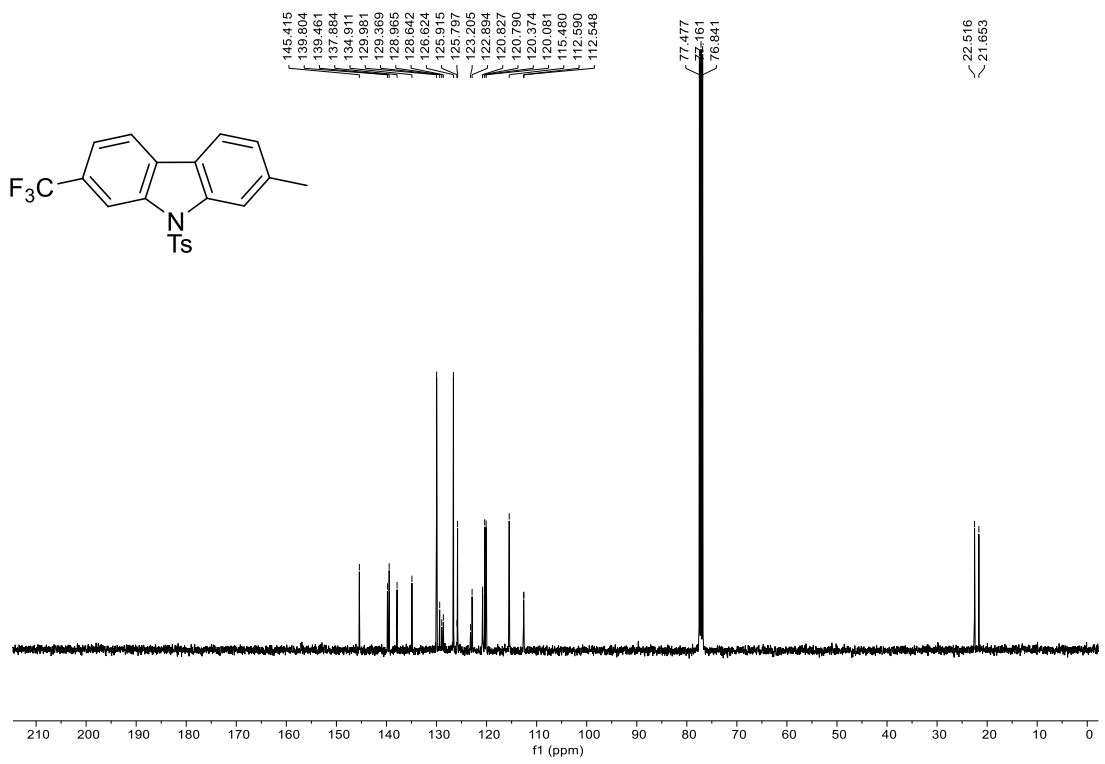

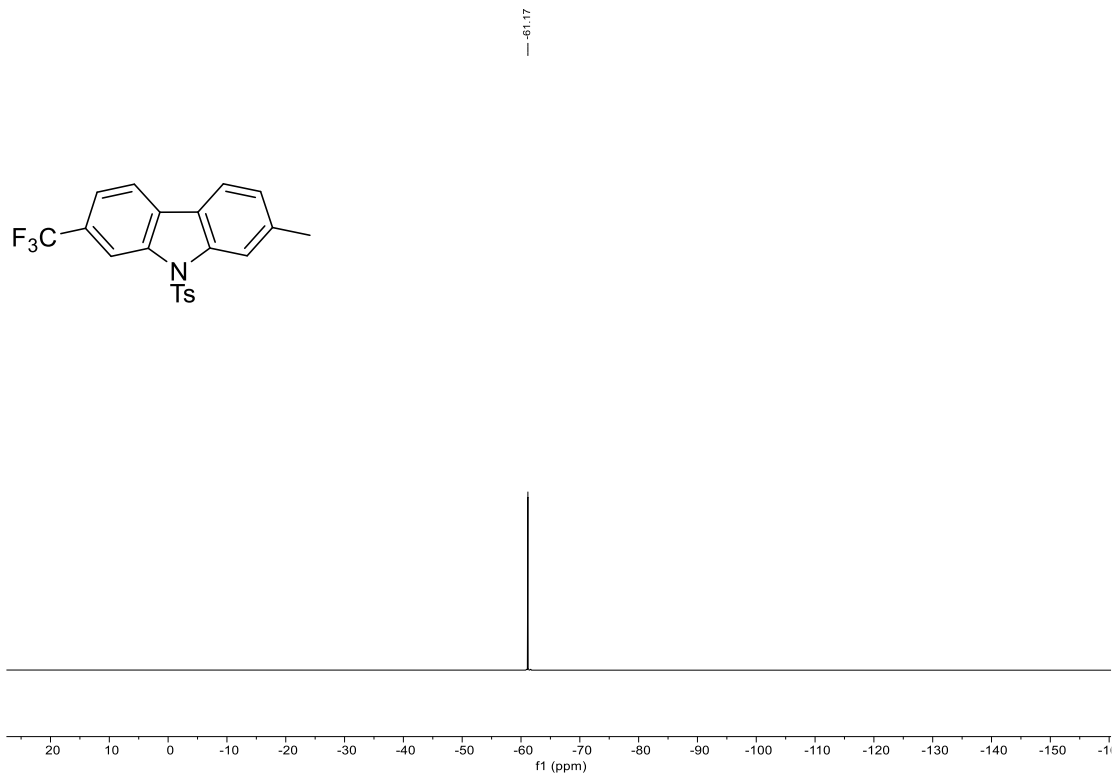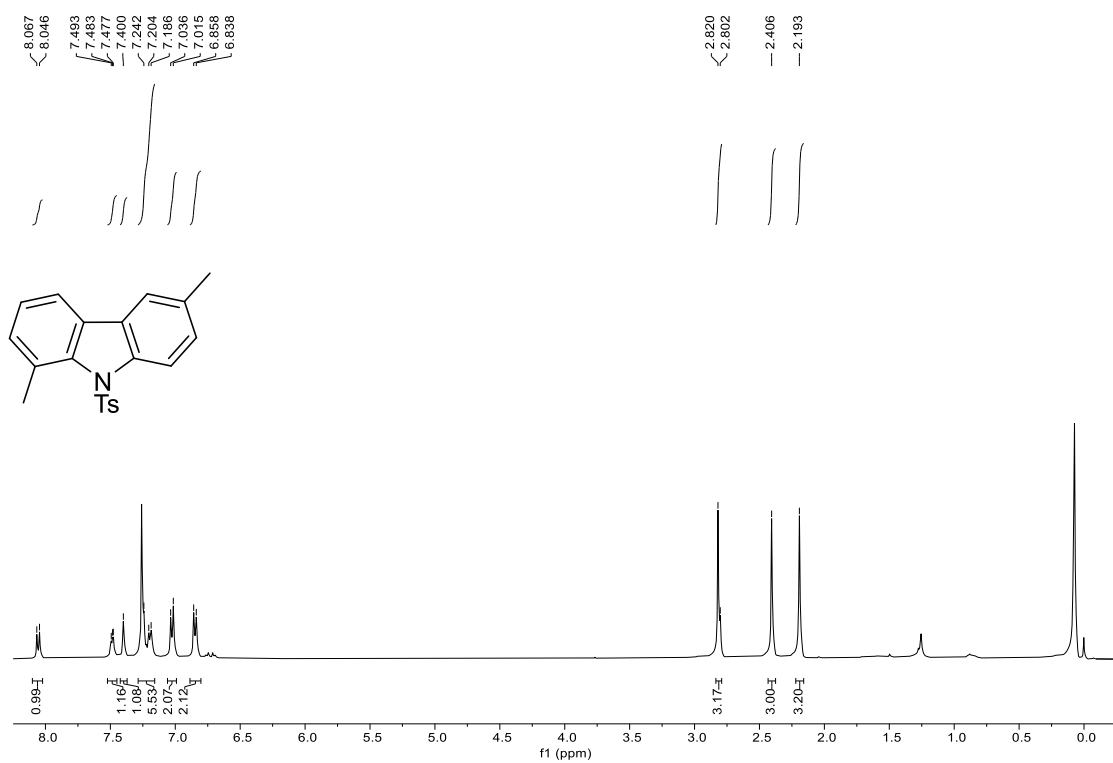

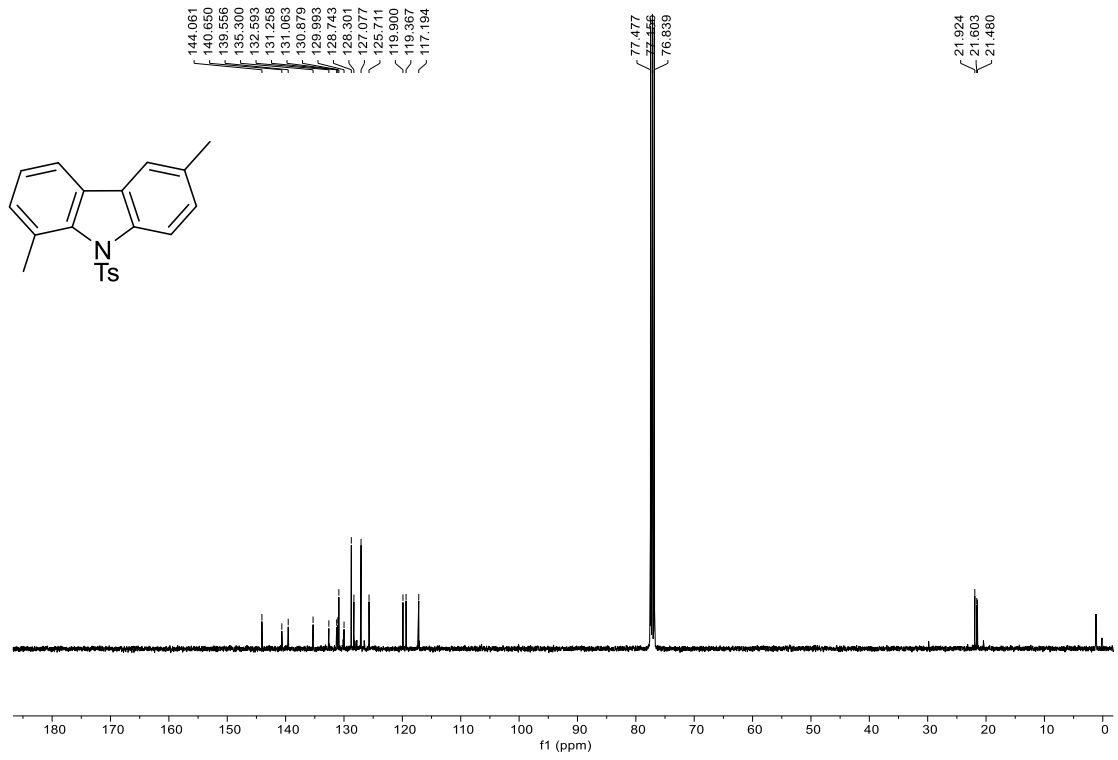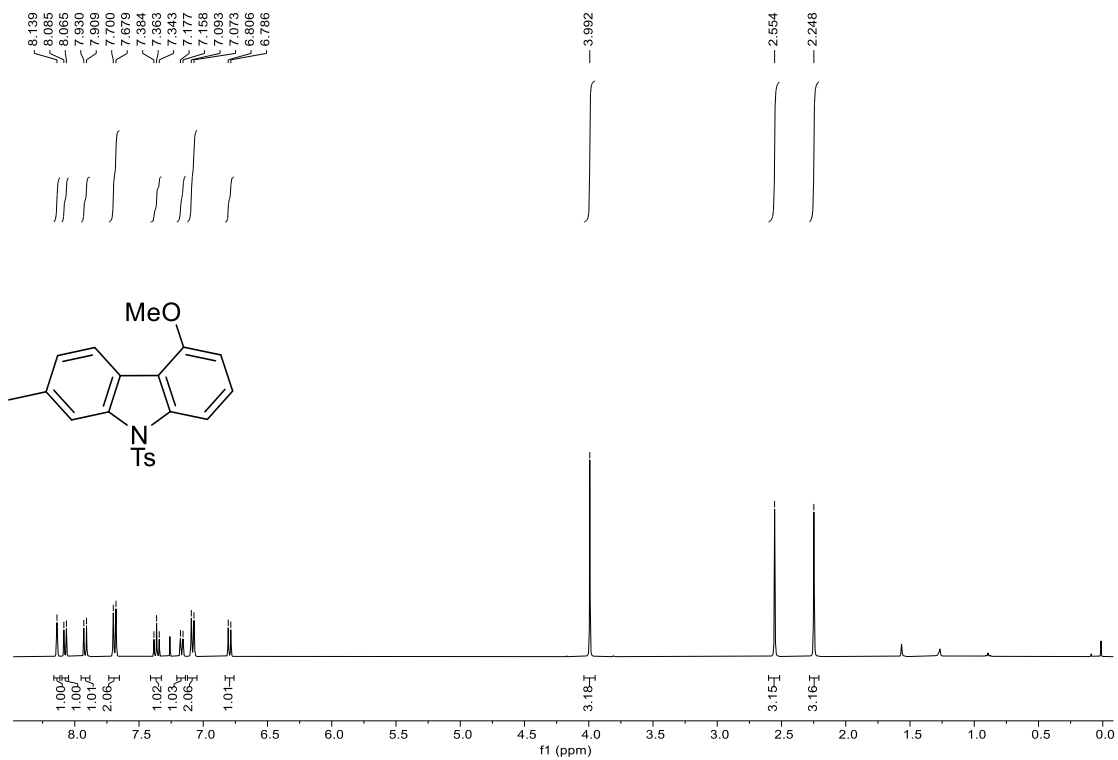

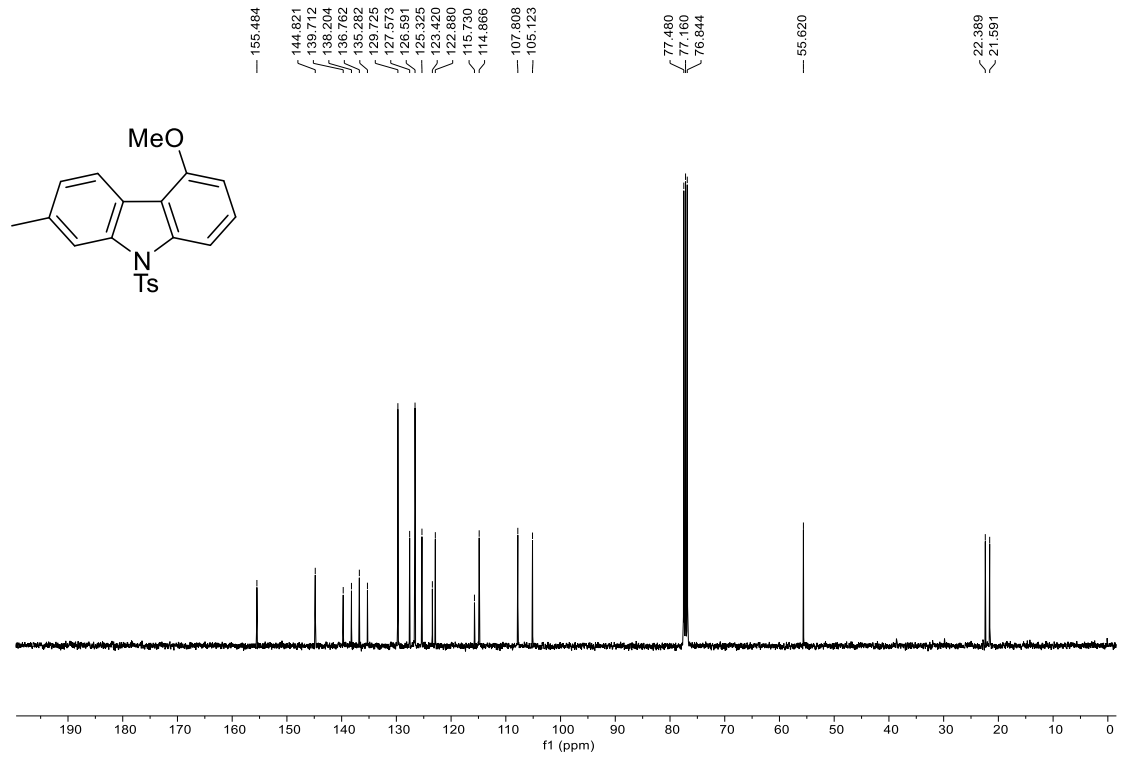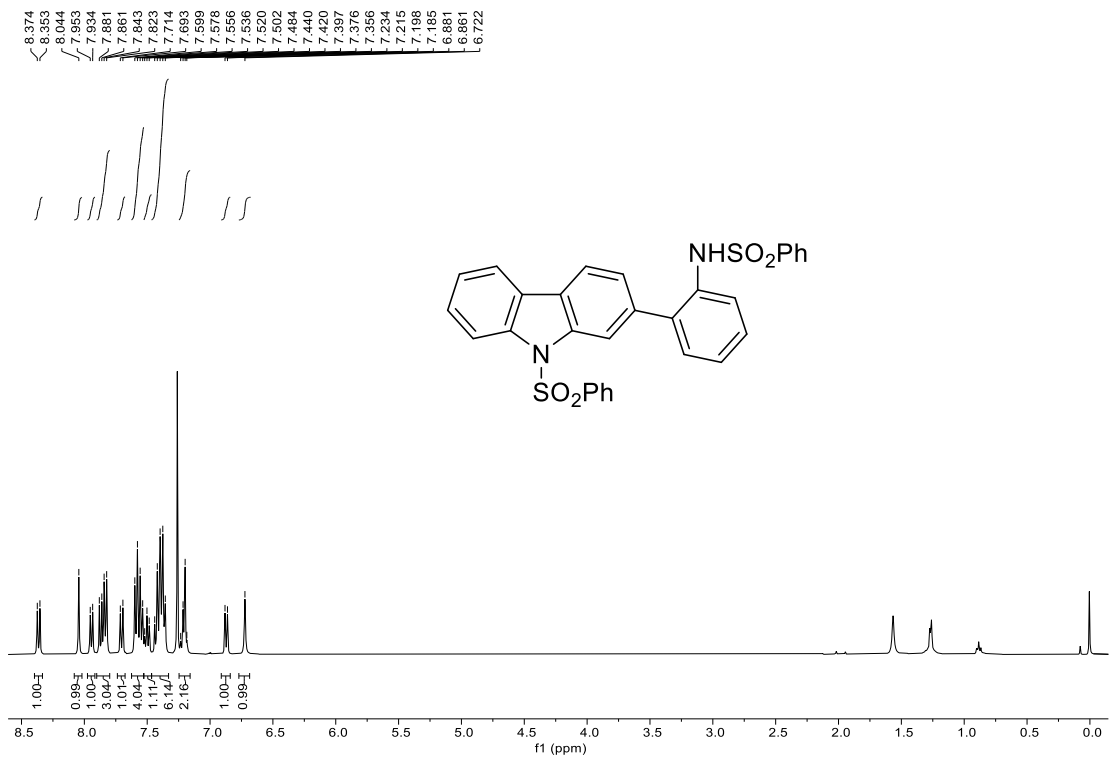

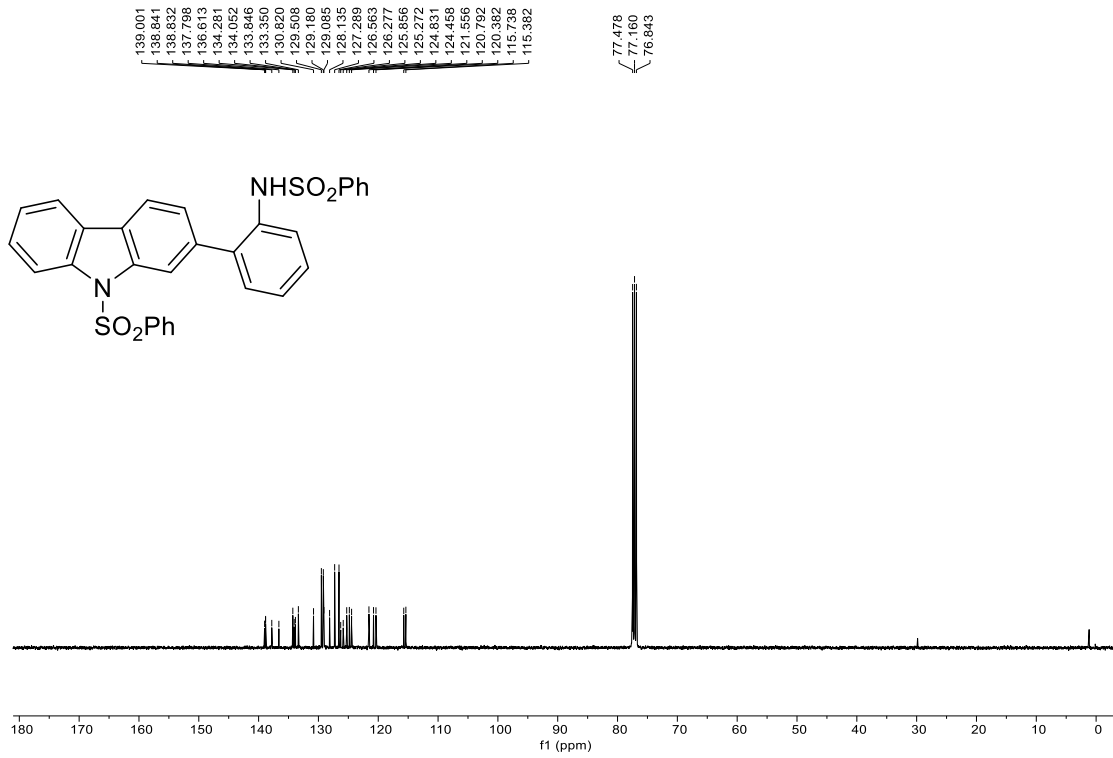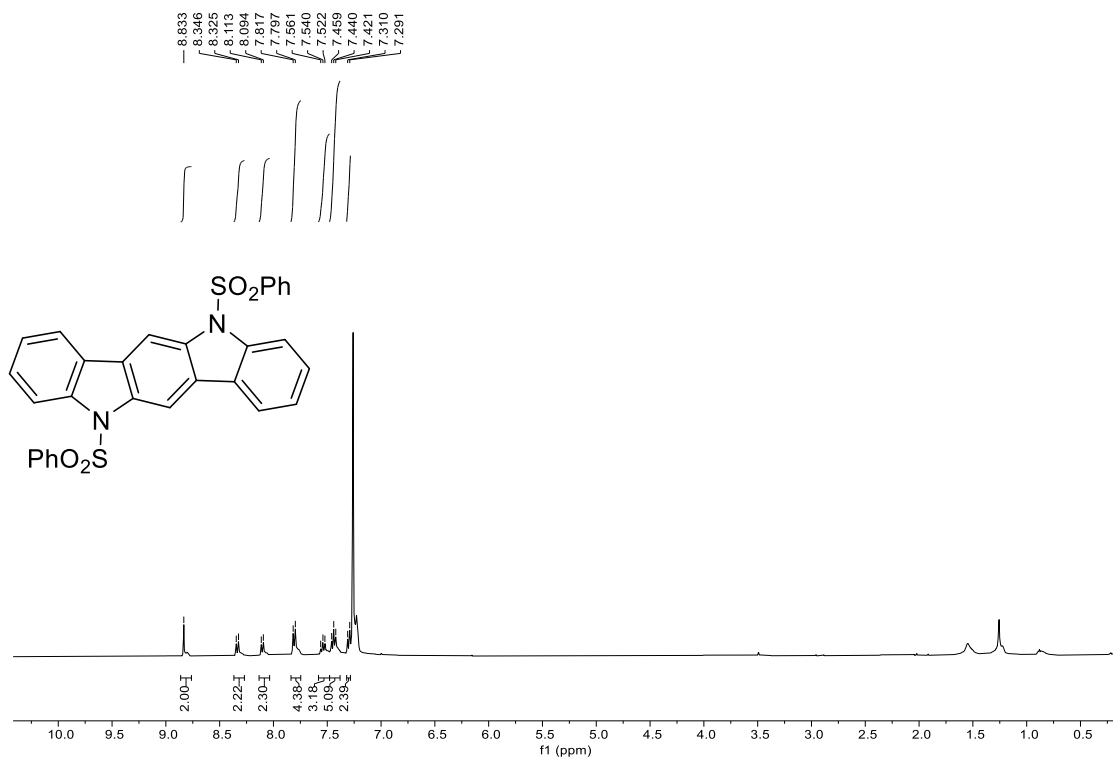

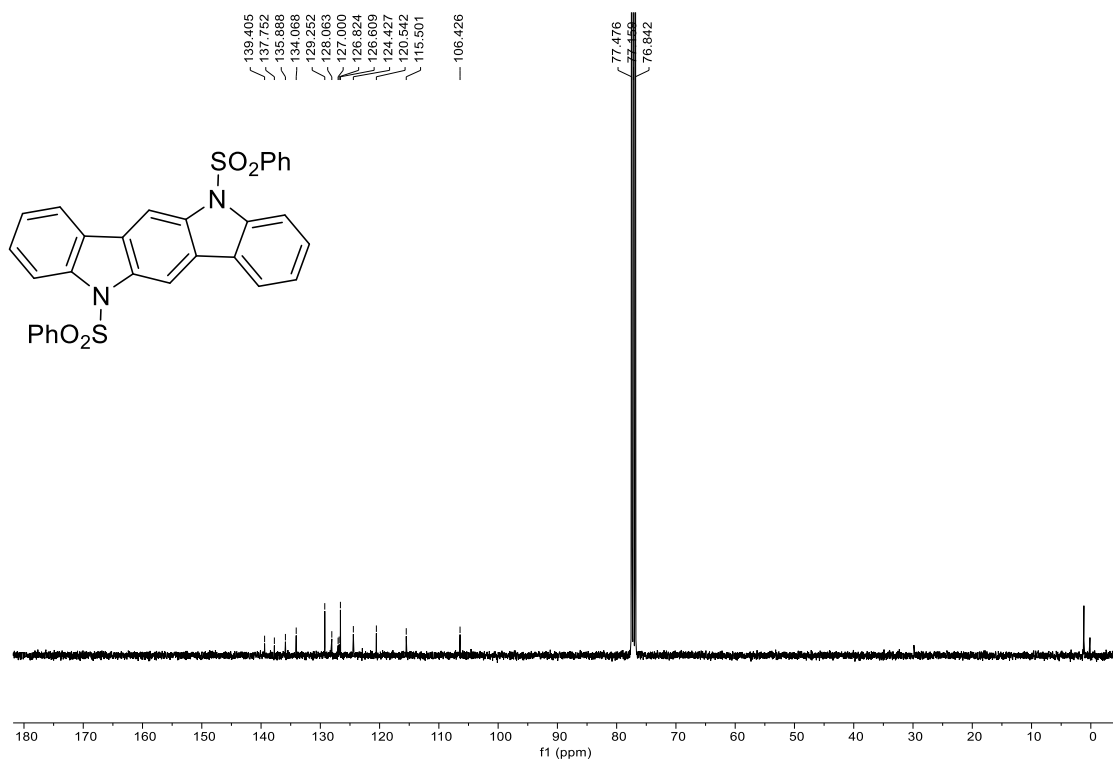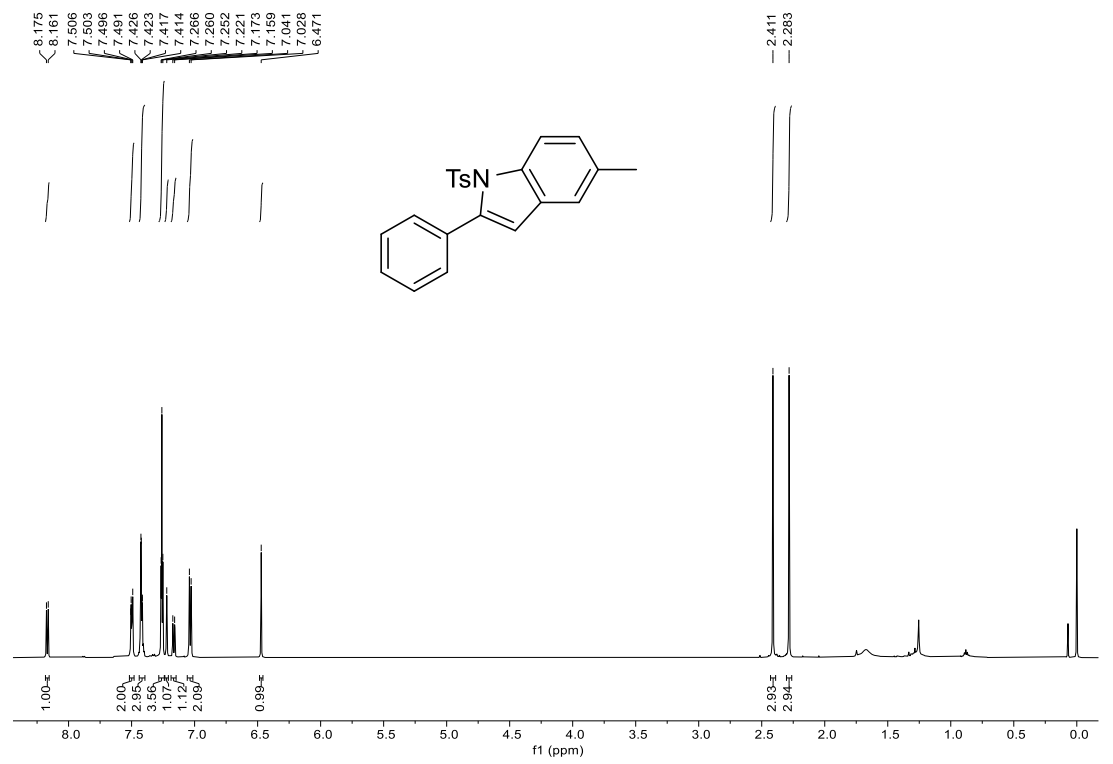



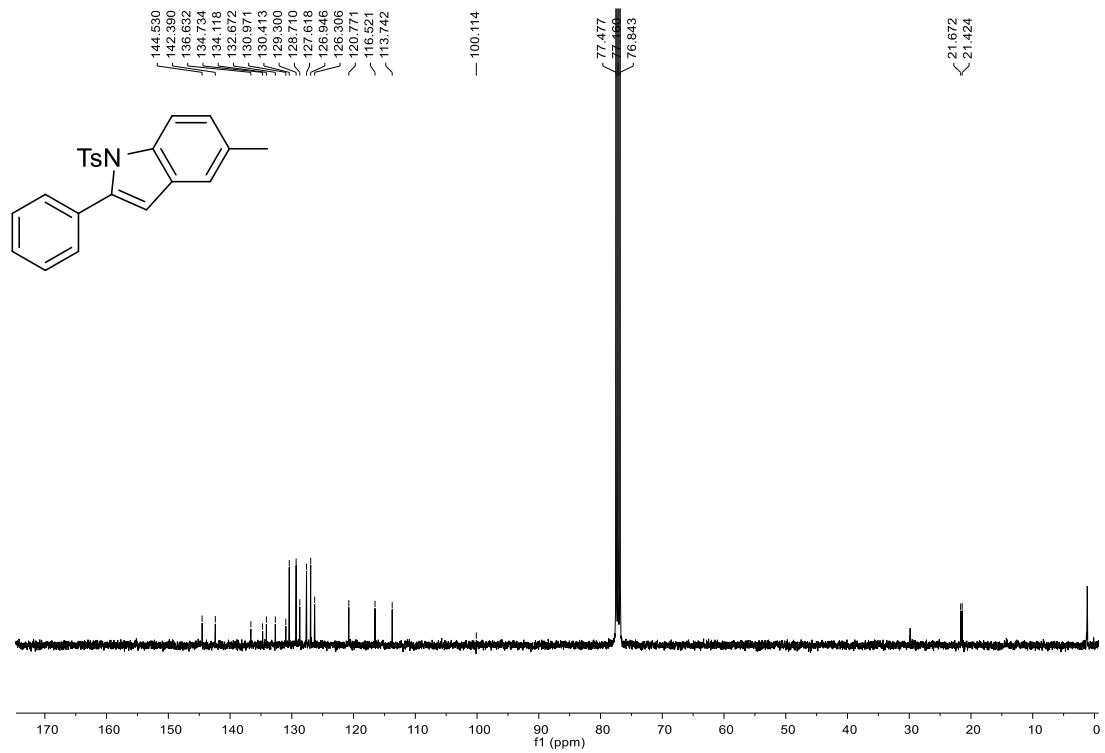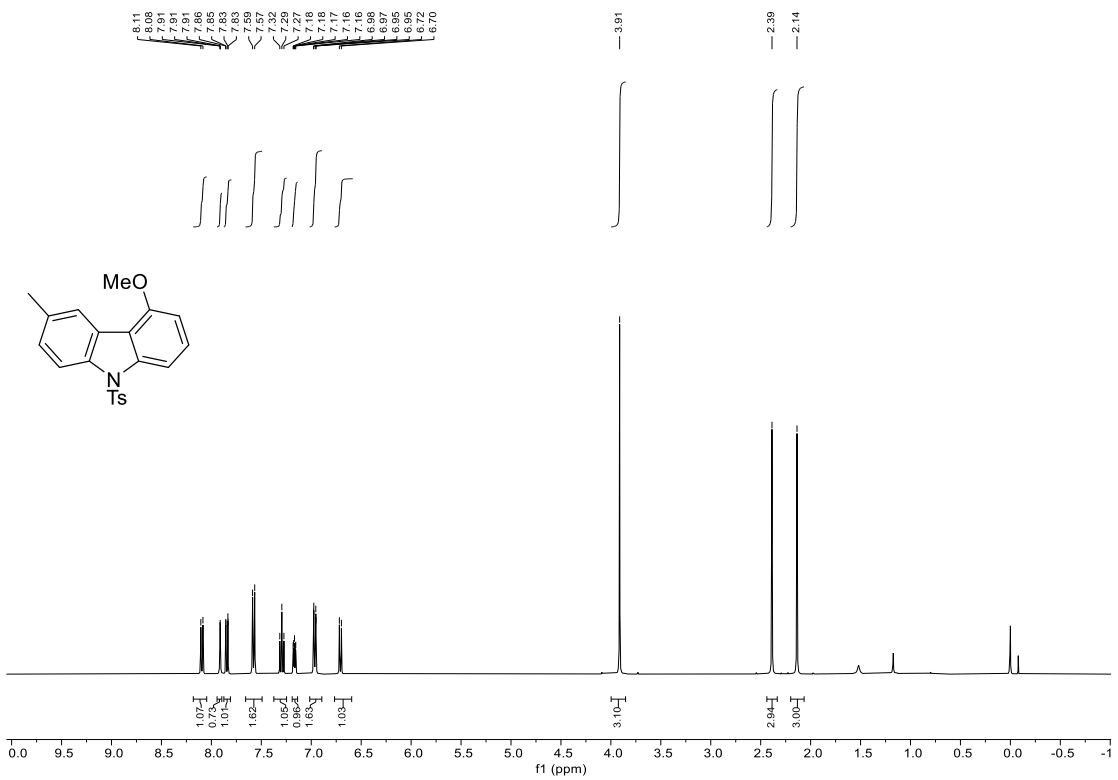

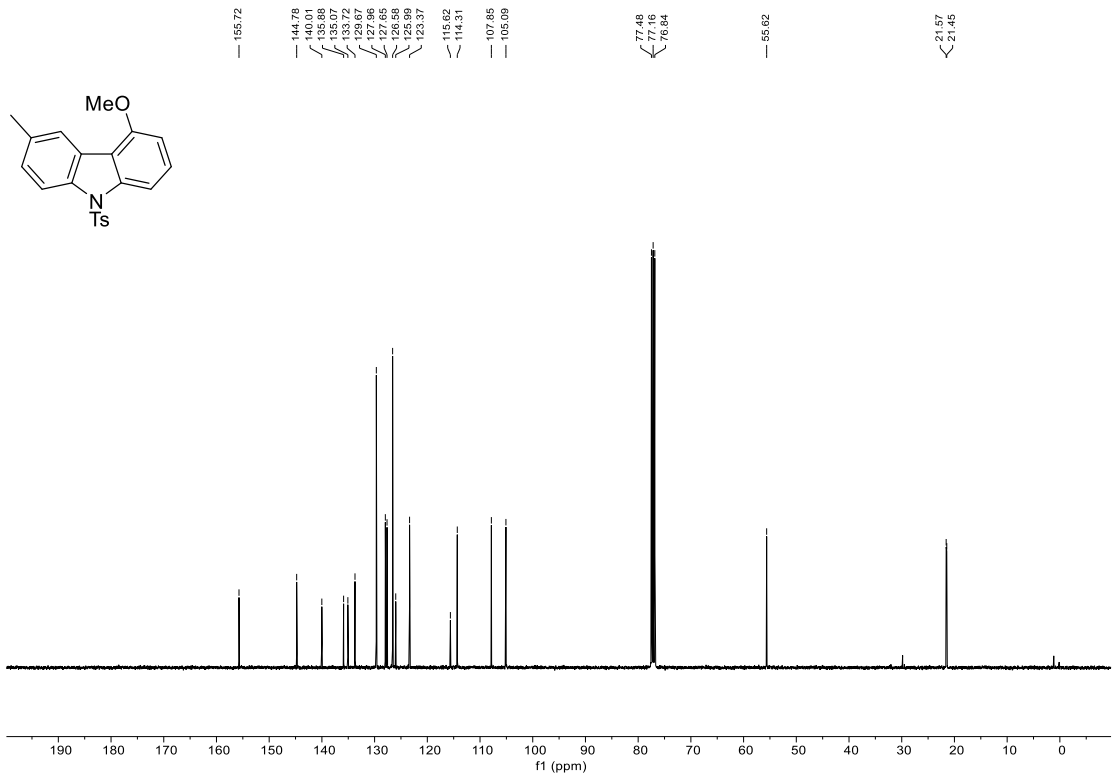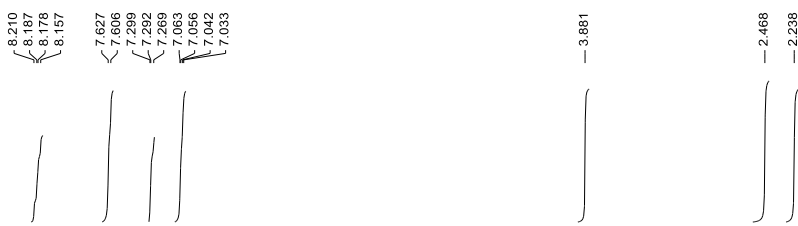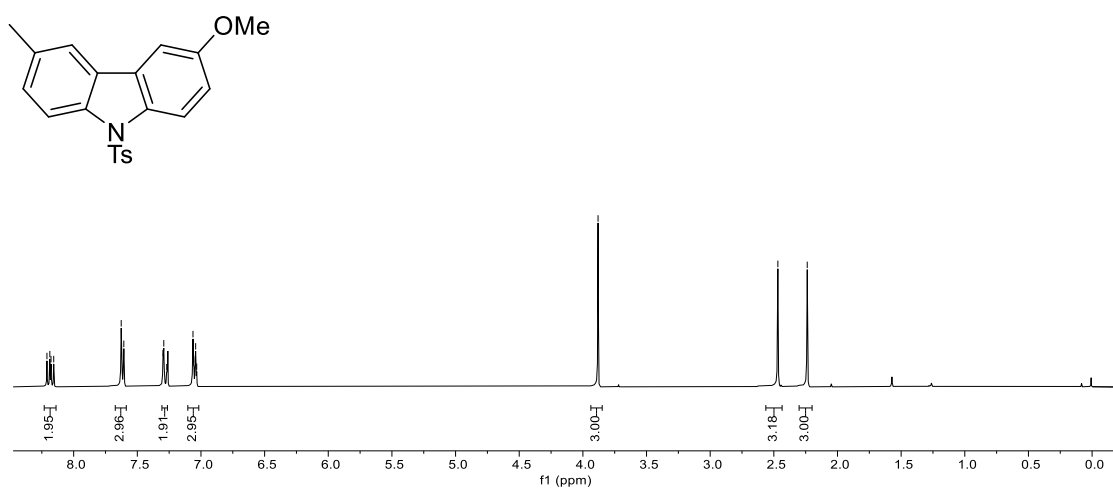

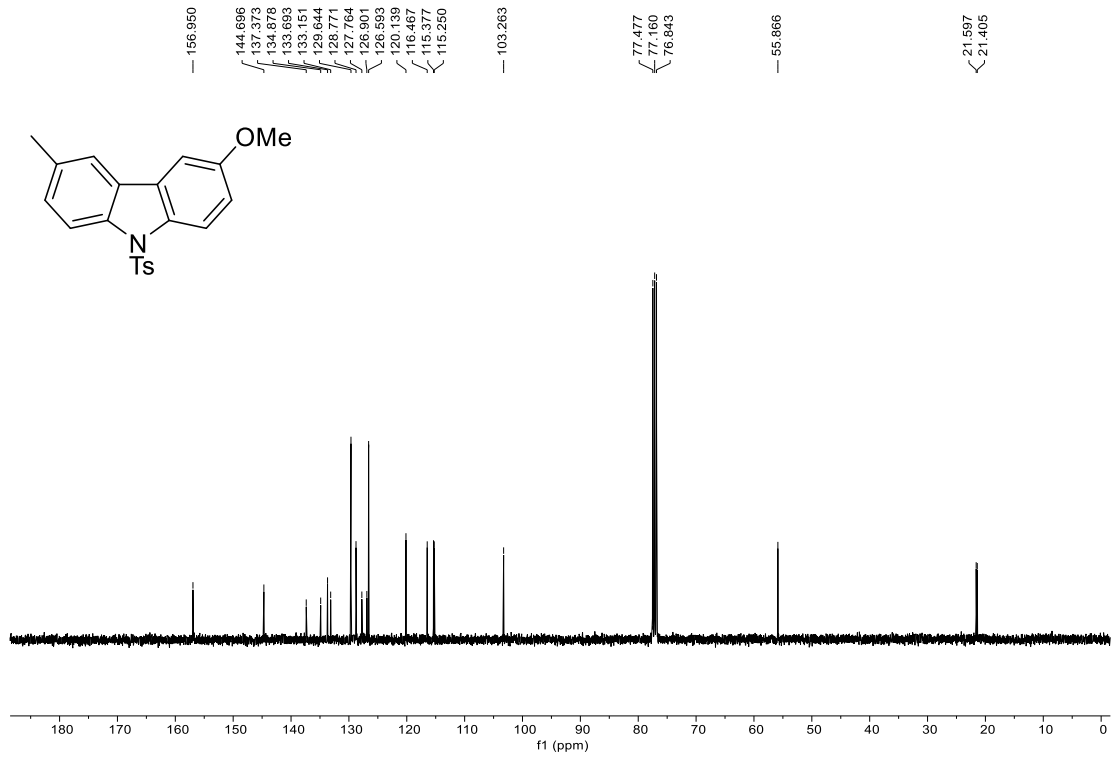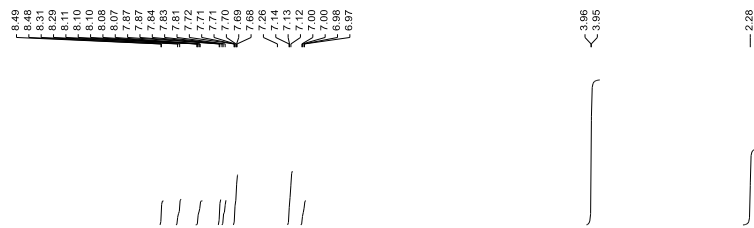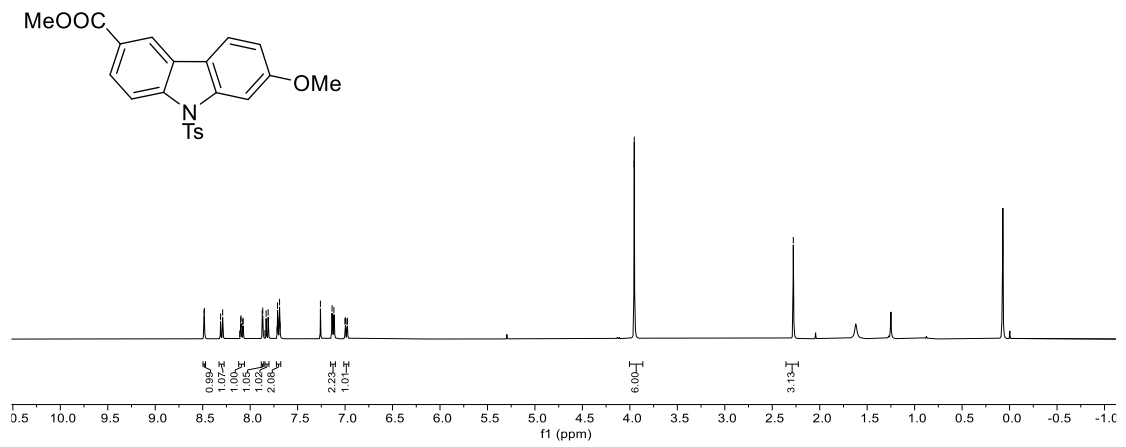

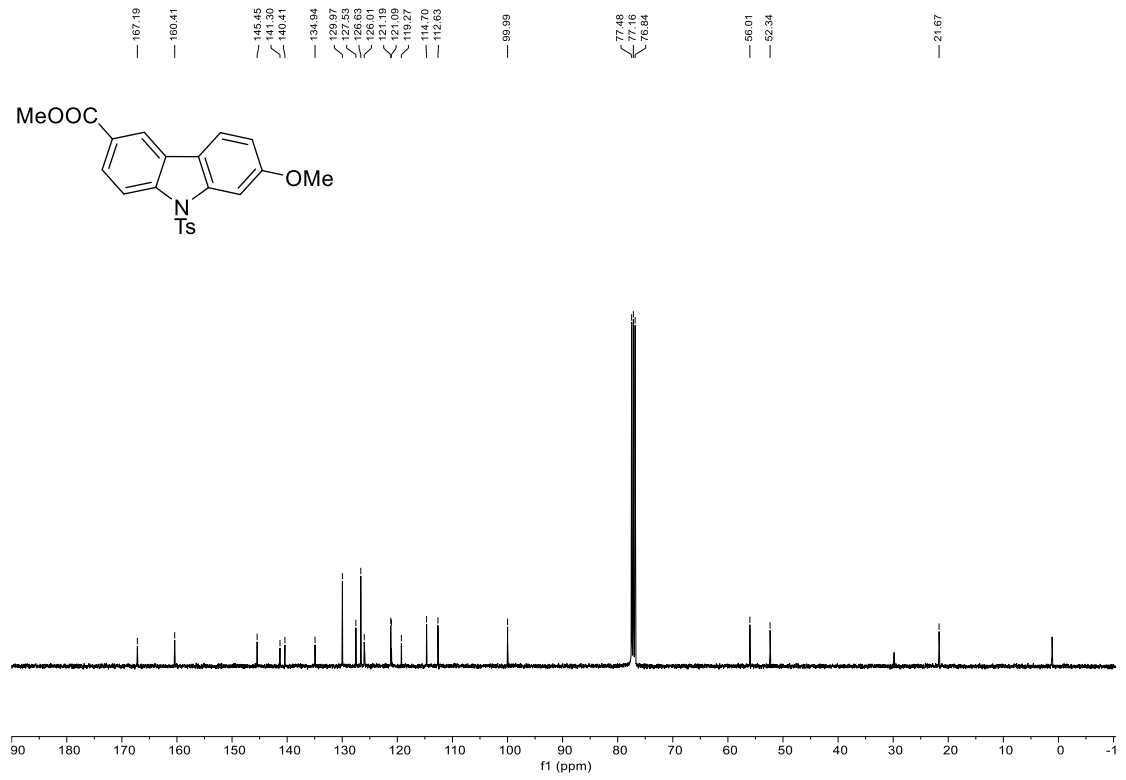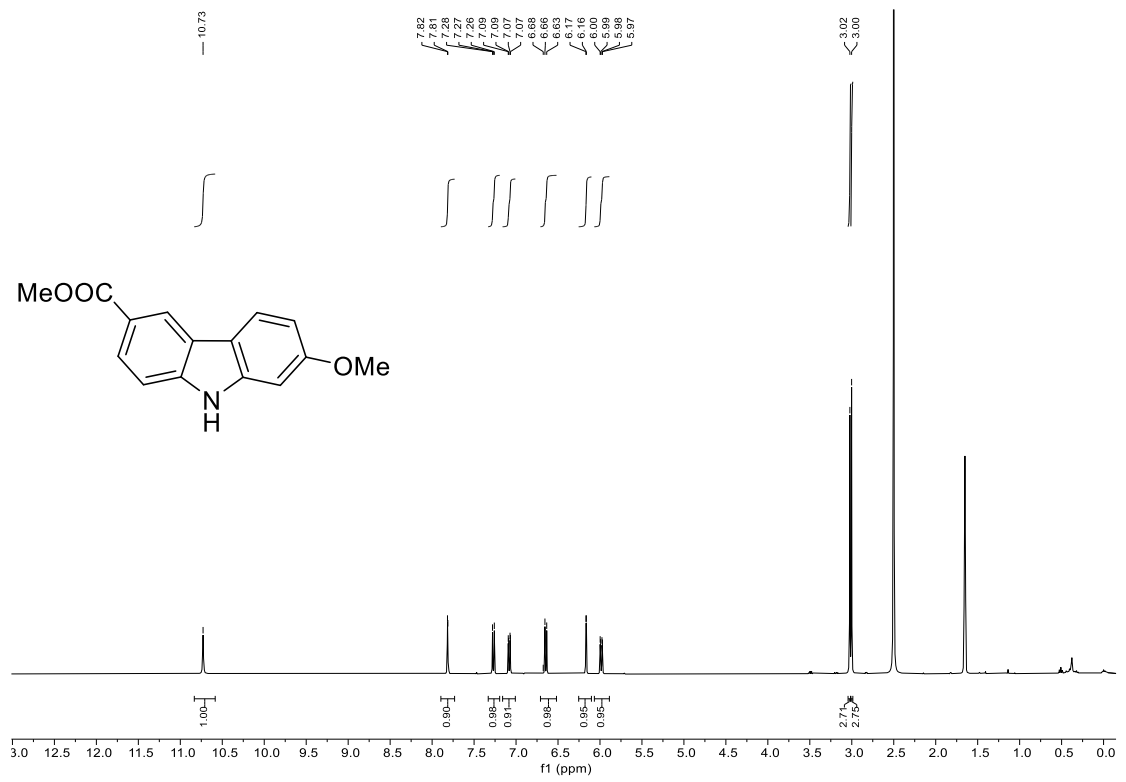

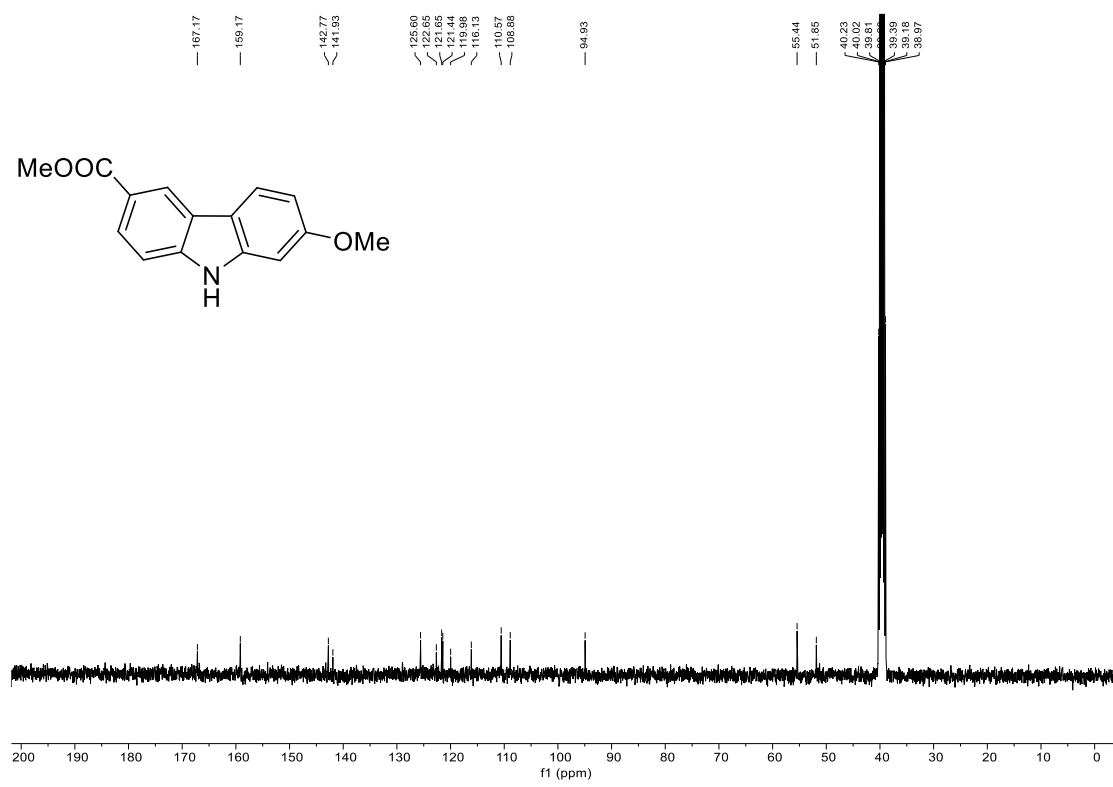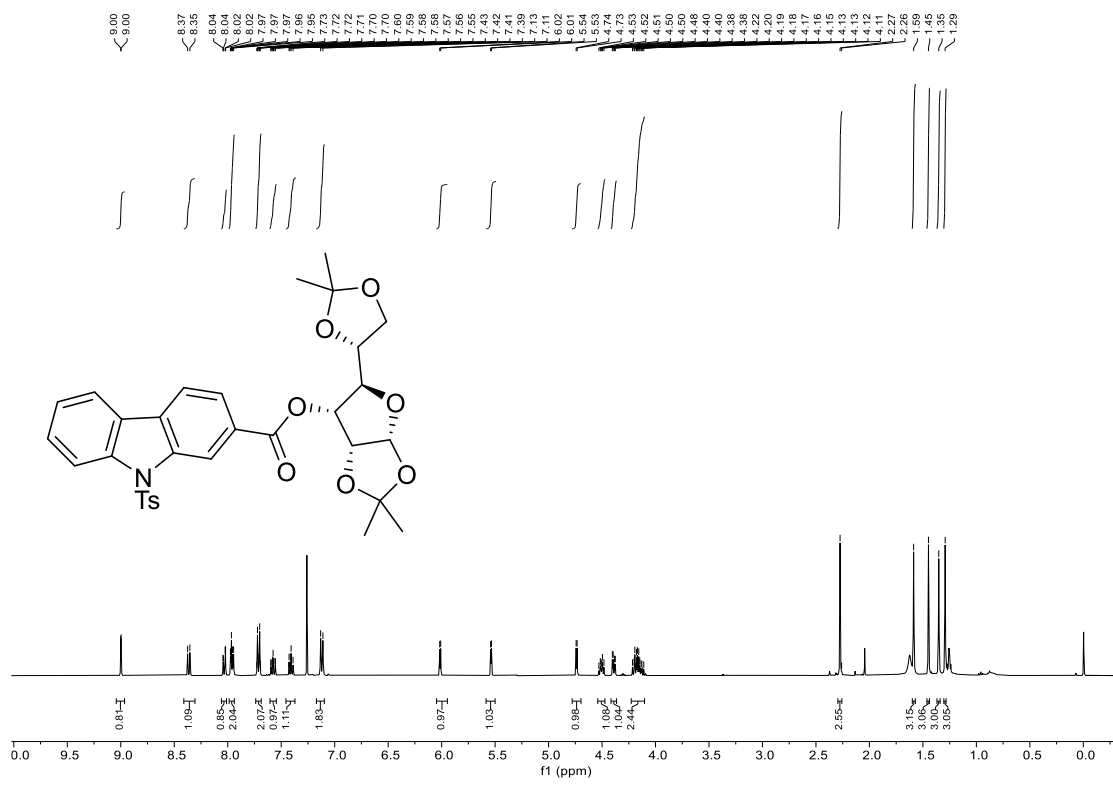

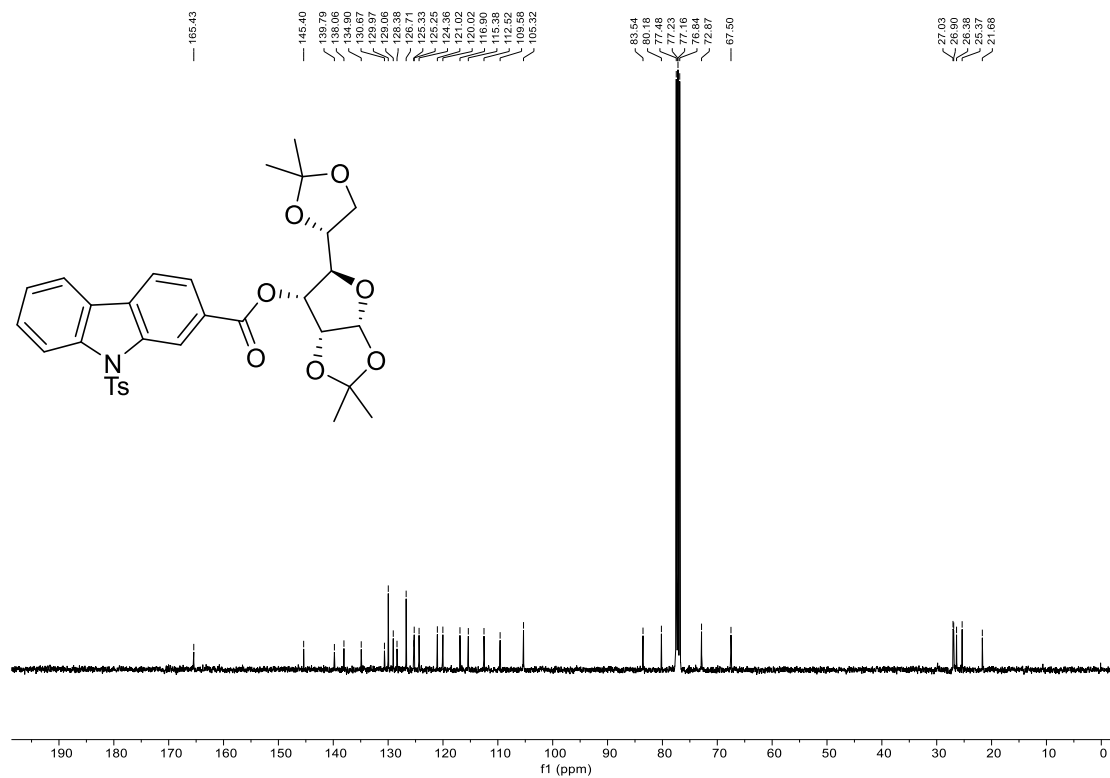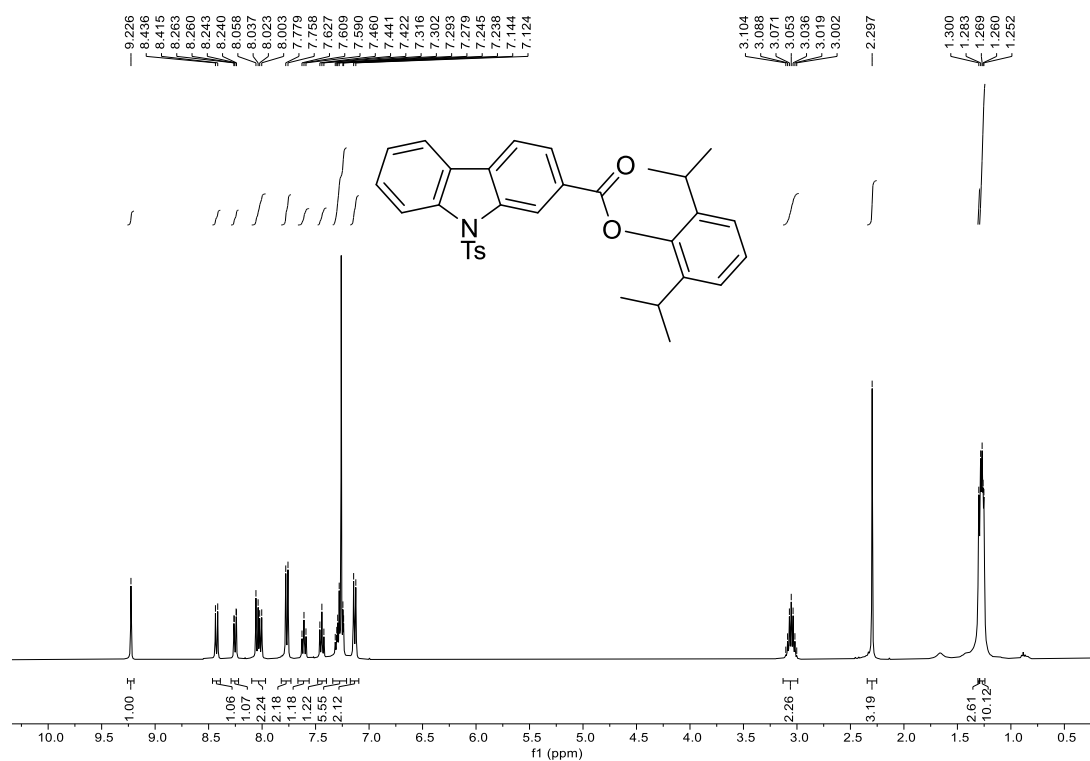

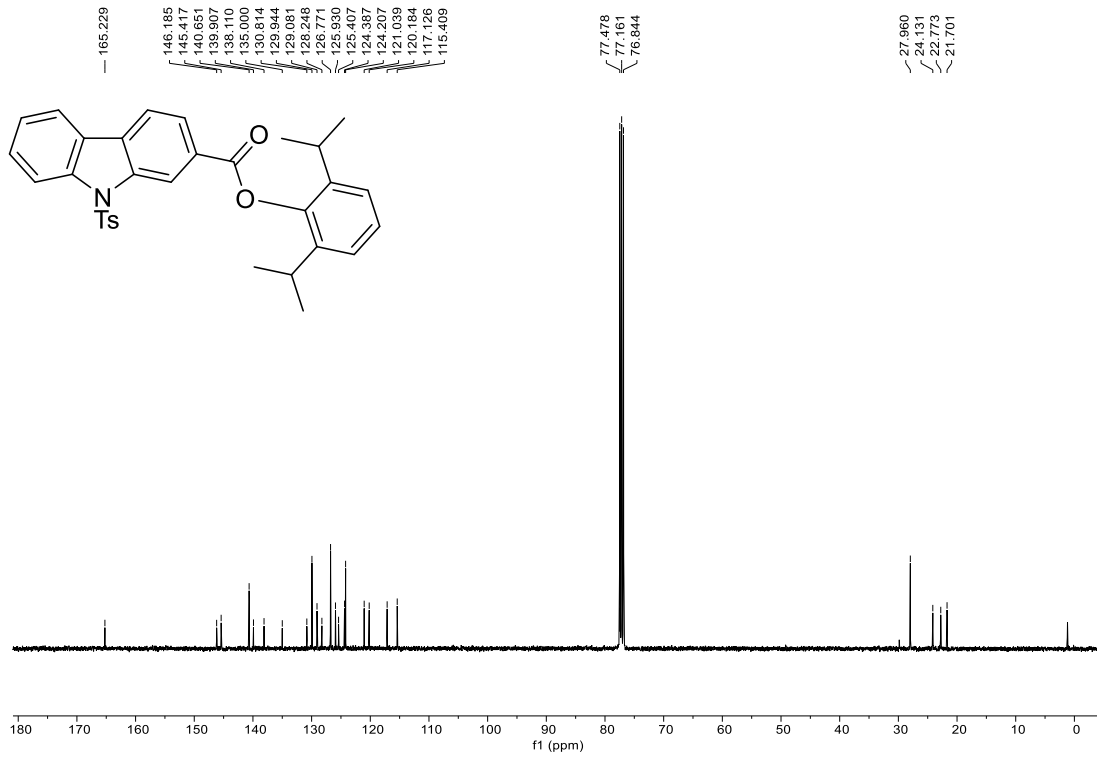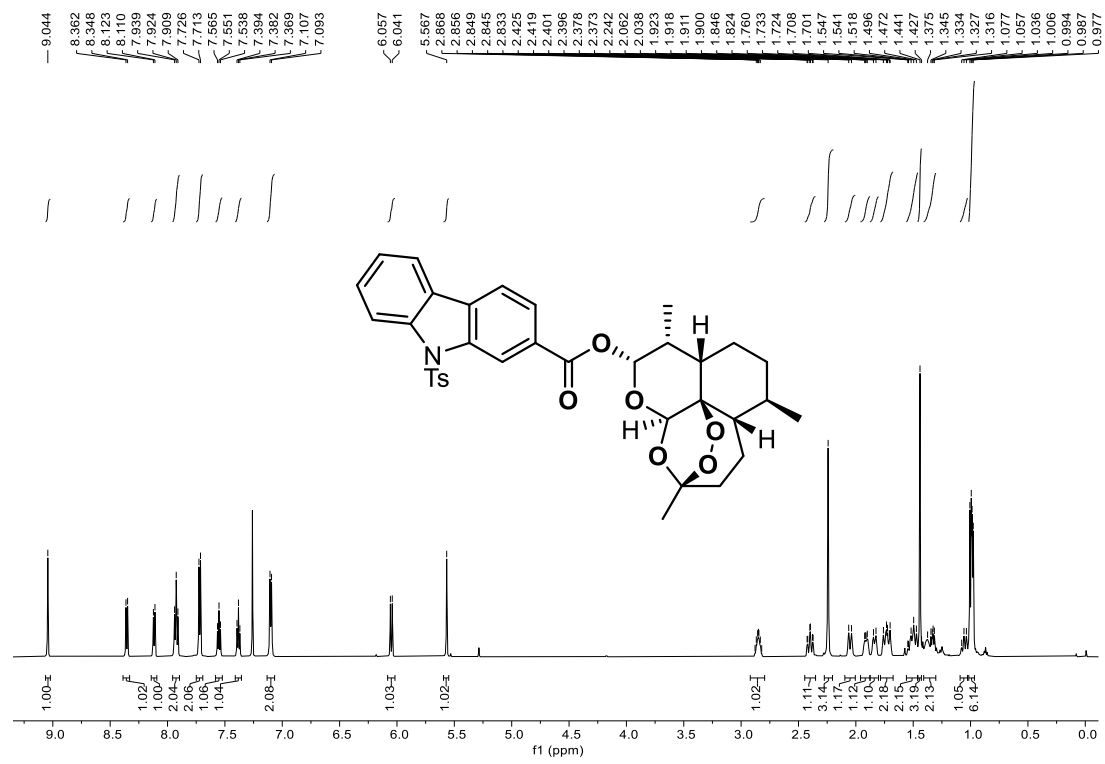

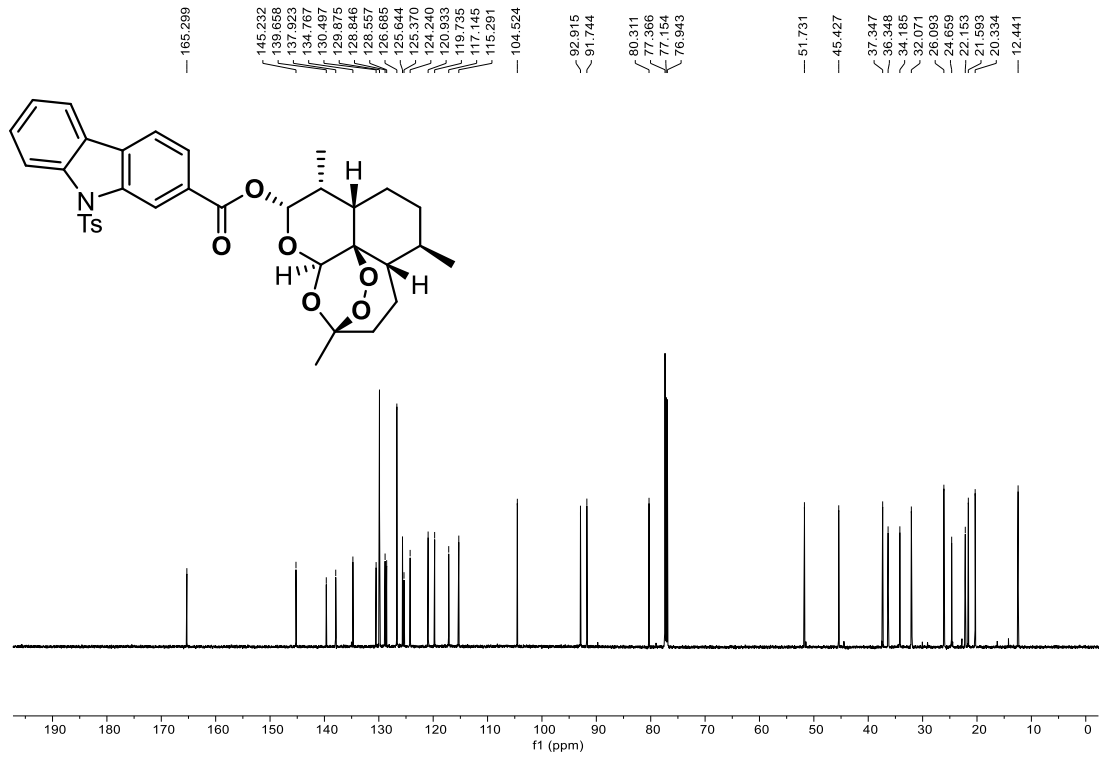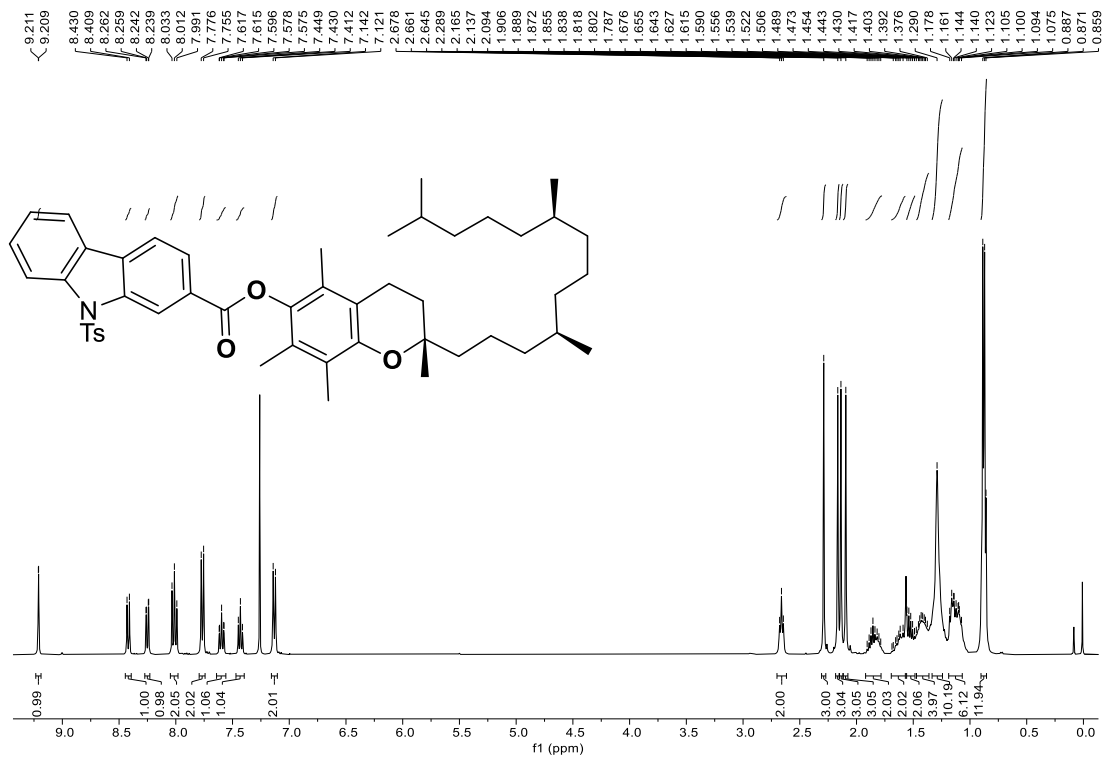



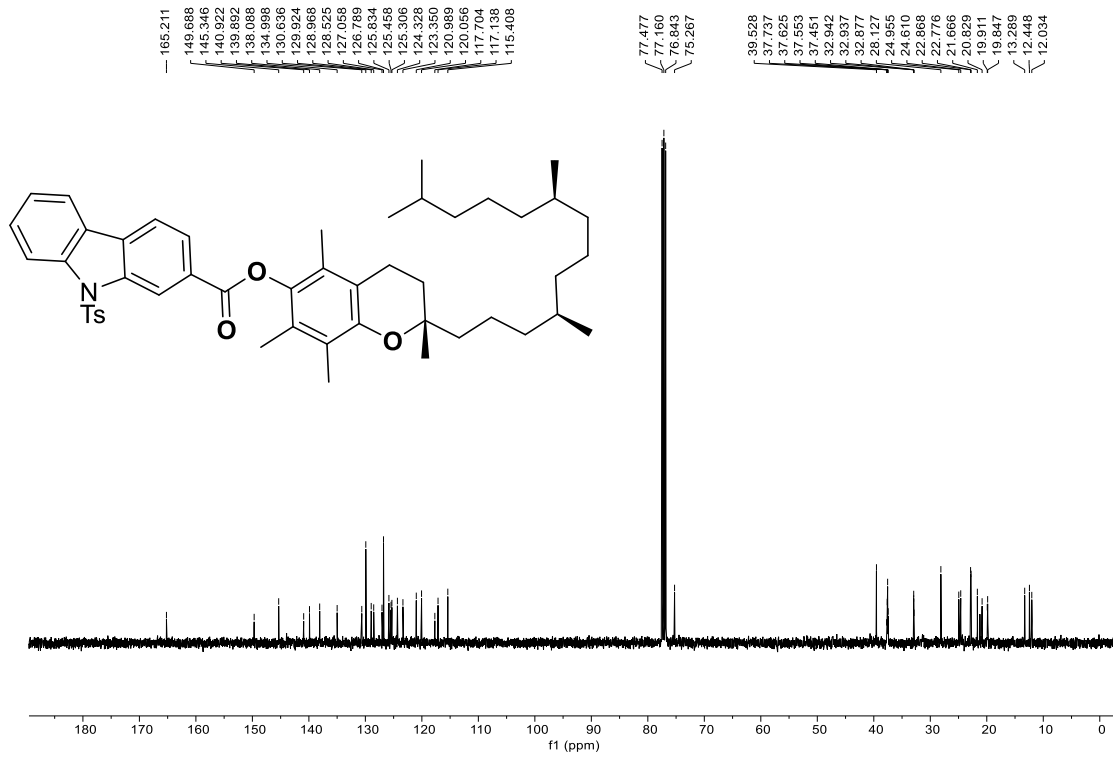

Supplement: d4qo00779d1.pdf [file d4qo00779d1.pdf]
